# Supplementary material for: Pharmacological Inhibition of CBP/p300 Blocks Estrogen Receptor Alpha (ERα) Function through Suppressing Enhancer H3K27 Acetylation in Luminal Breast Cancer
Source: MDPI journal article supplement (doi:10.3390/cancers13112799), 2021-06-04
Supplement: s1 [file s1]

### **RT-qPCR Primers**

#### **MYC qPCR**

F: AGCGACTCTGAGGAGGAACA

R: CTCTGACCTTTTGCCAGGAG

#### **CCND1 qPCR**

F: CCCTCGGTGTCCTACTTCAA

R: AGGAAGCGGTCCAGGTAGTT

#### **ESR1 qPCR**

F: TGGAGATCTTCGACATGCTG

R: TCCAGAGACTTCAGGGTGCT

#### **FASN qPCR**

F: CACAGGGACAACCTGGAGTT

R: ACTCCACAGGTGGGAACAAG

#### **TFF1 qPCR**

F: CACCATGGAGAACAAGGTGA

R: TGACACCAGGAAAACCACAA

#### **Actin qPCR**

F: GCTCCTCCTGAGCGCAAGTACTC

R: GTGGACAGCGAGGCCAGGAT

### **ChIP Primers**

#### **MYC enhancer**

F: CATCCAATAAACCTTCCTACCTGA

R: TGGCAGGTGTCCTAGAGCAT

#### **MYC promoter**

F: CTCTGGAACAGGCAGACACA

R: TGGATACCTTCCACCCAGAC

#### **CCND1 enhancer**

F: CAGTTTGTCTCCCGGGTTA

R: TCATCCAGAGCAAACAGCAG
