# Supplementary material for: Pharmacological Inhibition of CBP/p300 Blocks Estrogen Receptor Alpha (ERα) Function through Suppressing Enhancer H3K27 Acetylation in Luminal Breast Cancer
Source: MDPI journal article supplement (doi:10.3390/cancers13112799), 2021-06-04
Supplement: s1 [file s1]

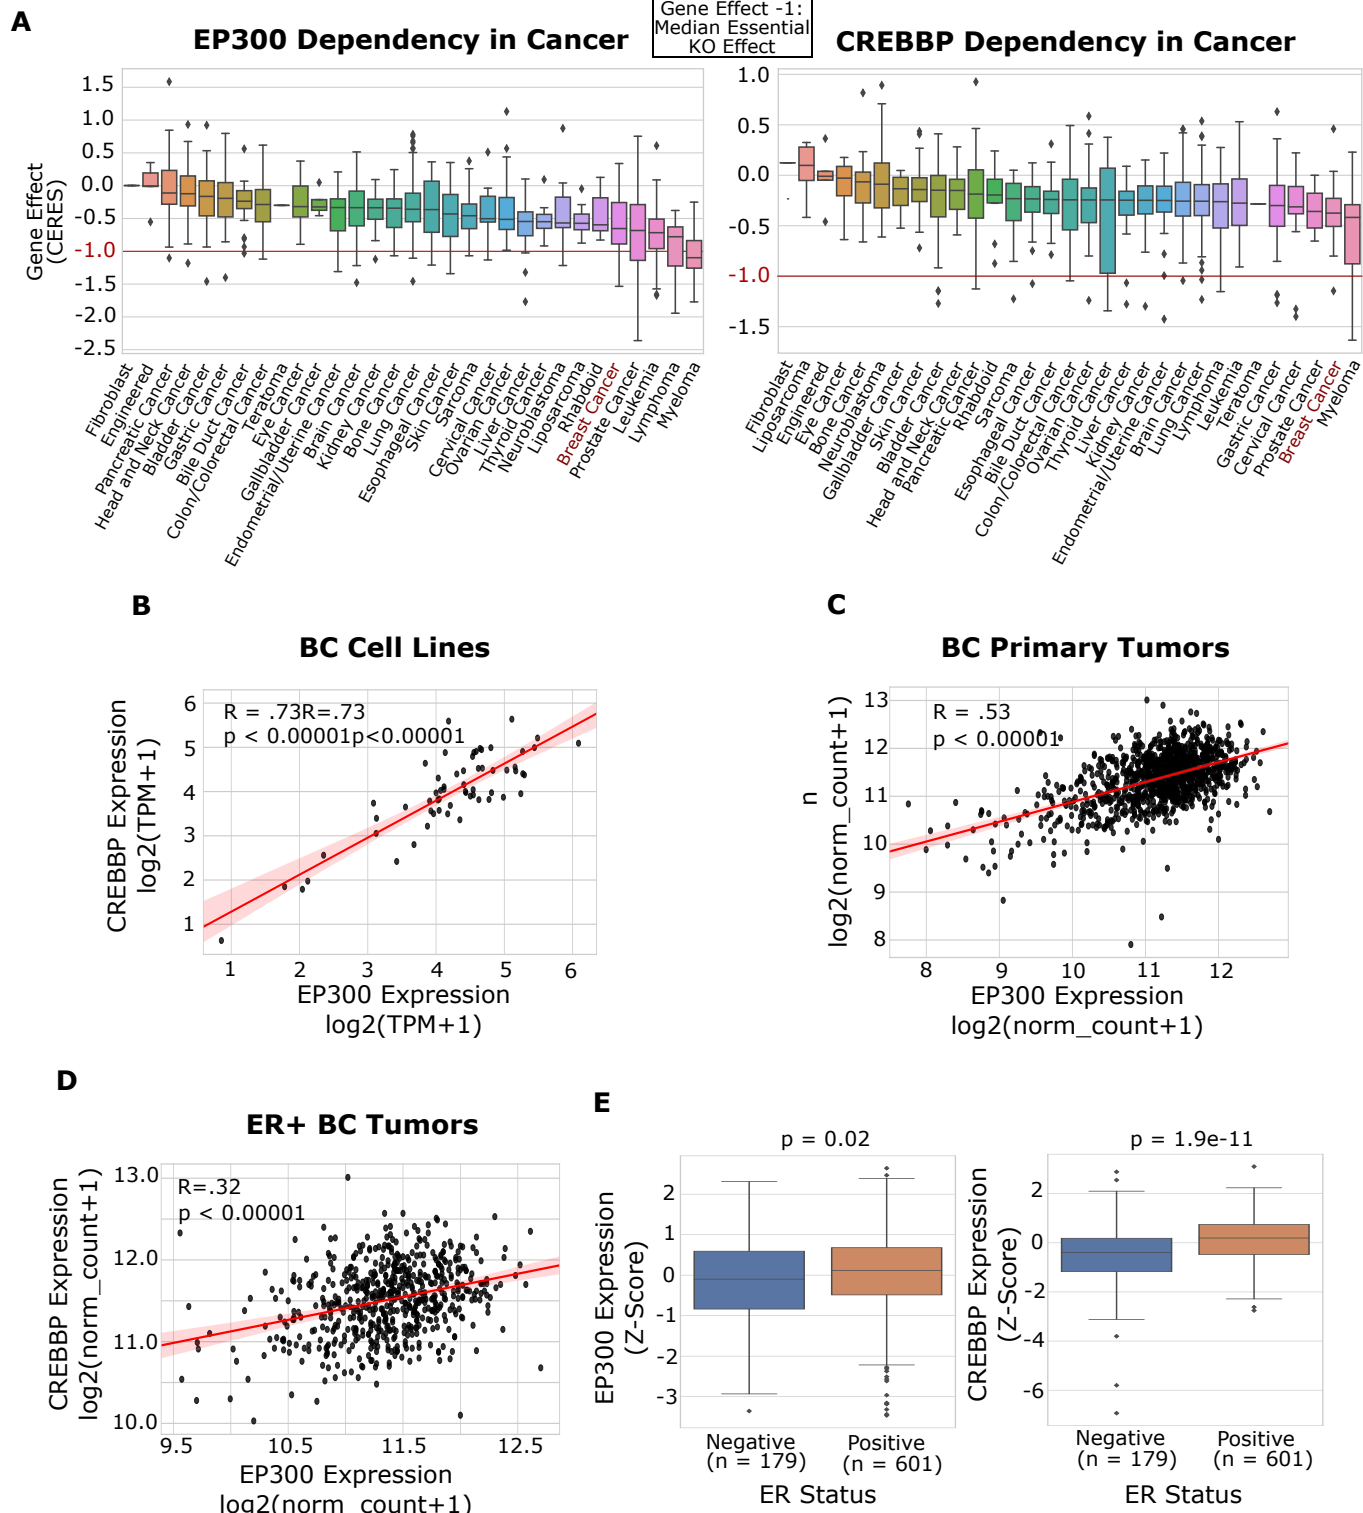

**Figure S1. CBP/p300 are positively correlated in BC cell lines/tumors and are upregulated in ER+ BC tumors**

(A) Genetic dependency on EP300 (left) and CREBBP (right) in cancer cell lines. A Gene Effect of -1 represents the median essential knockout (KO) effect. Data from Cancer Dependency Map.

(B) EP300 and CREBBP expression are positively correlated in BC cell lines. EP300 and CREBBP mRNA expression values were obtained from the Cancer Dependency Map for BC cell lines. EP300 and CREBBP expression levels in the BC cell lines were plotted via scatterplot and the Pearson correlation coefficient (R) with its associated p-value is displayed.

(C) EP300 and CREBBP expression are positively correlated in BC primary tumors. EP300 and CREBBP mRNA expression values were obtained for primary BC tumors in the TCGA BRCA dataset using the Xena database. EP300 and CREBBP expression levels in the samples were plotted via scatterplot and the Pearson correlation coefficient (R) with its associated p-value is displayed.

(D) EP300 and CREBBP expression are positively correlated in primary ER+ BC tumors. EP300 and CREBBP mRNA expression values were obtained for primary ER+ BC tumors in the TCGA BRCA dataset using the Xena database. EP300 and CREBBP expression levels in the samples were plotted via scatterplot and the Pearson correlation coefficient (R) with its associated p-value is displayed.

(E) EP300 and CREBBP expression are upregulated in ER+ BC. EP300 and CREBBP mRNA expression values were obtained for primary BC tumors in the TCGA BRCA dataset and samples were filtered to analyze ER+ BC samples versus ER- BC samples using the Xena database.

**A**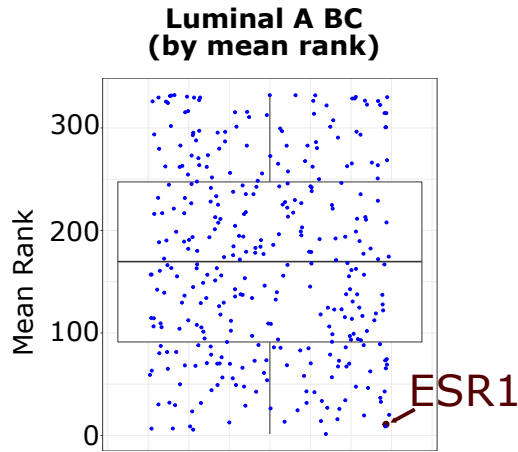**B**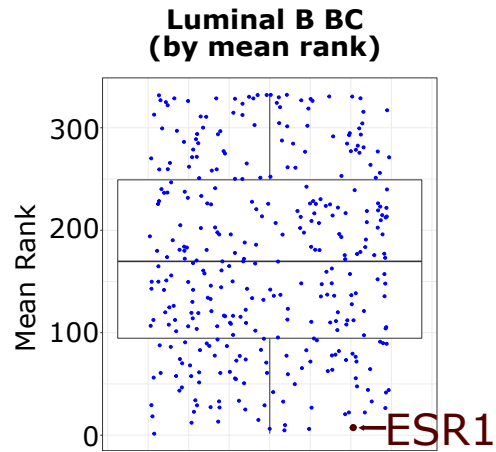

**Figure S2. ESR1 is among the top 10 most highly expressed CBP/p300 partners in luminal BC, as measured by mean rank.**

(A) ER is one of the top 10 most highly expressed CBP/p300 partners in luminal A BC (data from TCGA). The expression of each CBP/p300 interaction partner was ranked 1-354 (total 354 partners, with 1 having the highest mRNA expression value and 354 having the lowest) within each tumor sample. The mean rank of each CBP/p300 partner was then determined across samples and mean rank was plotted.

(B) ER is one of the top 10 most highly expressed CBP/p300 partners in luminal B BC (data from TCGA). The ranking of each CBP/p300 interaction partner and plotting were done as in (A).

**A**

Relapse-Free Survival of BC Patients Who Received Endocrine Therapy  
(Auto Select Best Cutoff)

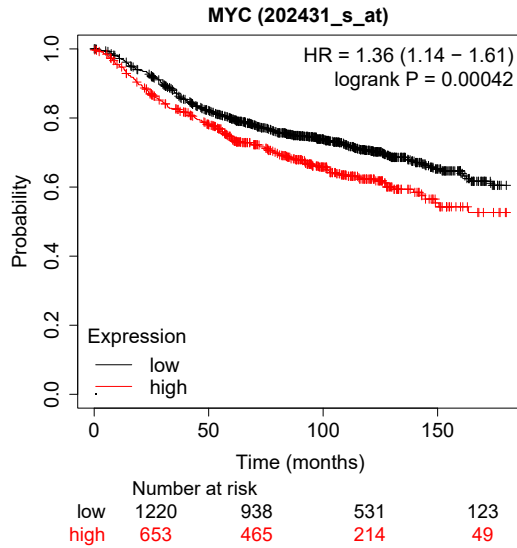

Relapse-Free Survival of BC Patients Who Received Endocrine Therapy  
(Trichotomization: T1 vs T3)

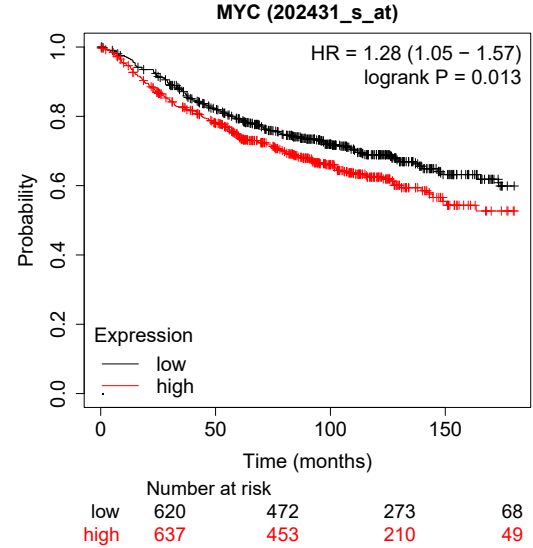**B**

Relapse-Free Survival of BC Patients Who Received Tamoxifen Therapy  
(Auto Select Best Cutoff)

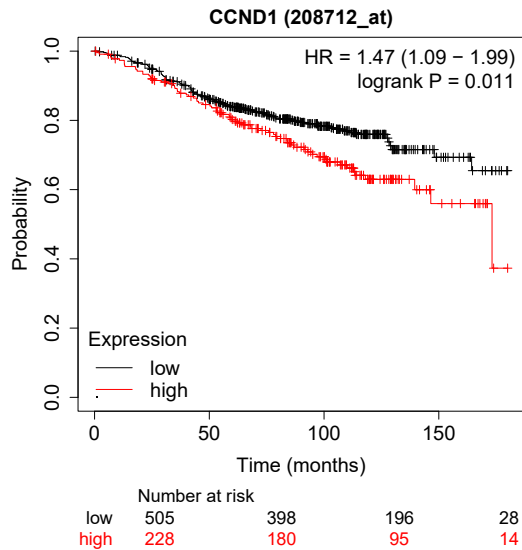

Relapse-Free Survival of BC Patients Who Received Tamoxifen Therapy  
(Auto Select Best Cutoff)

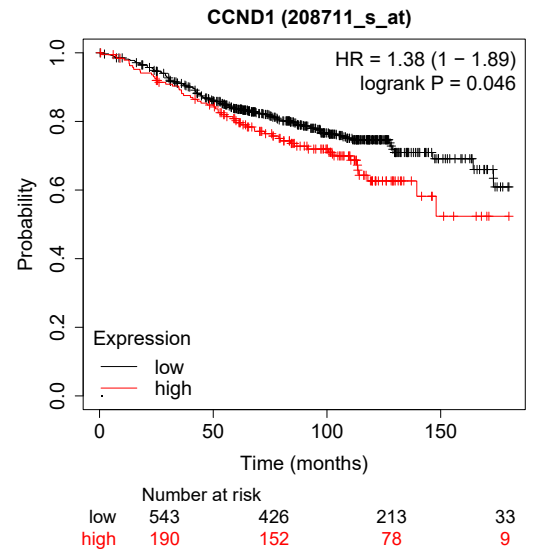

**Figure S3: MYC and CCND1 expression negatively correlate with relapse-free survival of patients treated with endocrine therapy**

(A) High MYC expression negatively correlates with relapse-free survival in patients treated with endocrine therapy, using two cutoff methods (auto:left and trichotomization:right). Data and plot from KM Plotter (kmplot.com)

(B) High CCND1 expression negatively correlates with relapse-free survival in patients treated with tamoxifen therapy. Plots for two different CCND1 probes are shown (left and right). Data and plot from KM Plotter (kmplot.com)

**A**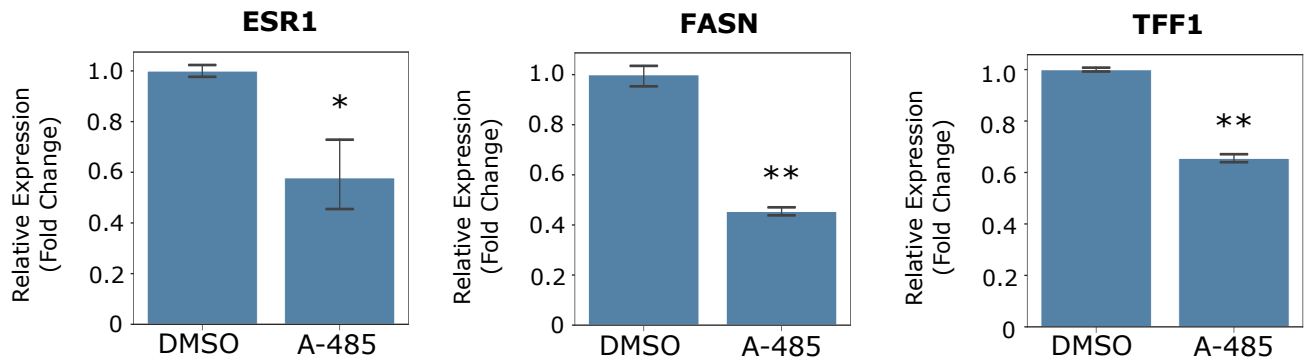**B**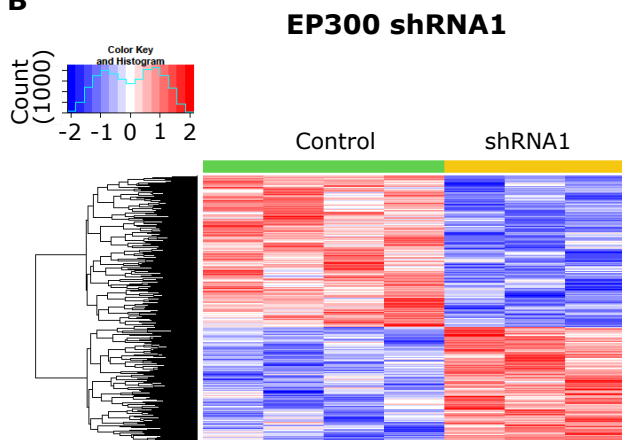**GSEA Hallmark Gene Sets**

| GSEA Hallmarks                    | # of Enriched Genes (total 178) | p-value              |
|-----------------------------------|---------------------------------|----------------------|
| Estrogen Response Late            | 9                               | 3.12 e <sup>-7</sup> |
| TNFA Signaling Via NFKB           | 8                               | 3.46 e <sup>-6</sup> |
| UV Response DN                    | 6                               | 4.74 e <sup>-5</sup> |
| Inflammatory Response             | 6                               | 2.86 e <sup>-4</sup> |
| UV Response Up                    | 5                               | 7.28 e <sup>-4</sup> |
| Epithelial Mesenchymal Transition | 5                               | 2.06 e <sup>-3</sup> |
| Estrogen Response Early           | 5                               | 2.06 e <sup>-3</sup> |
| KRAS Signaling DN                 | 5                               | 2.06 e <sup>-3</sup> |
| IL6_JAK_STAT3 Signaling           | 3                               | 6.95 e <sup>-3</sup> |
| Angiogenesis                      | 2                               | 1.12 e <sup>-2</sup> |

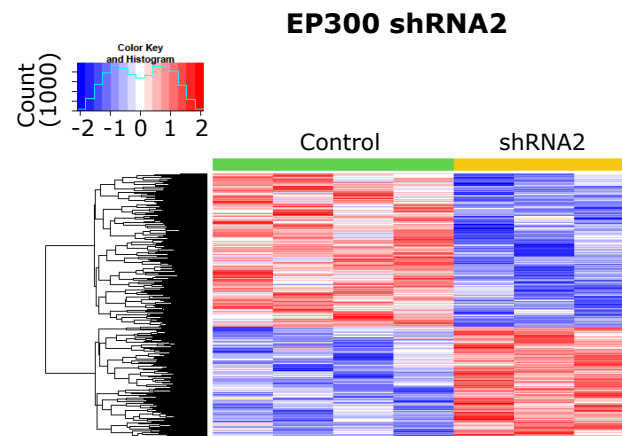**GSEA Hallmark Gene Sets**

| GSEA Hallmarks                    | # of Enriched Genes (total 144) | p-value              |
|-----------------------------------|---------------------------------|----------------------|
| Estrogen Response Late            | 7                               | 8.57 e <sup>-6</sup> |
| TNFA Signaling Via NFKB           | 6                               | 9.02 e <sup>-5</sup> |
| UV Response DN                    | 5                               | 1.8 e <sup>-4</sup>  |
| Epithelial Mesenchymal Transition | 5                               | 8.09 e <sup>-4</sup> |
| Allograft Rejection               | 4                               | 6.01 e <sup>-3</sup> |
| Estrogen Response Early           | 4                               | 6.01 e <sup>-3</sup> |
| KRAS Signaling DN                 | 4                               | 6.01 e <sup>-3</sup> |
| Angiogenesis                      | 2                               | 7.46 e <sup>-3</sup> |
| Hedgehog Signaling                | 2                               | 7.46 e <sup>-3</sup> |

**Figure S4. A-485 and EP300 genetic knockdown commonly repress ER target genes in MCF-7 cells**

(A) 24 h treatment with A-485 (3  $\mu$ M) downregulates expression of ESR1 (n = 3), FASN (n = 3) and TFF1 (n = 2), as measured by RT-qPCR, in MCF-7 cells.

(B) EP300 genetic knockdown via two different shRNAs reduces ER target gene expression in MCF-7 cells (data from GEO GSE76200). A heatmap of the differentially expressed genes (p value < 0.05, |FC|  $\geq$  1.25) for each EP300 shRNA is shown on the left. The downregulated genes were analyzed for their involvement in biological pathways using the GSEA Hallmarks Gene Sets. The top statistically enriched pathways are shown in a table (right).

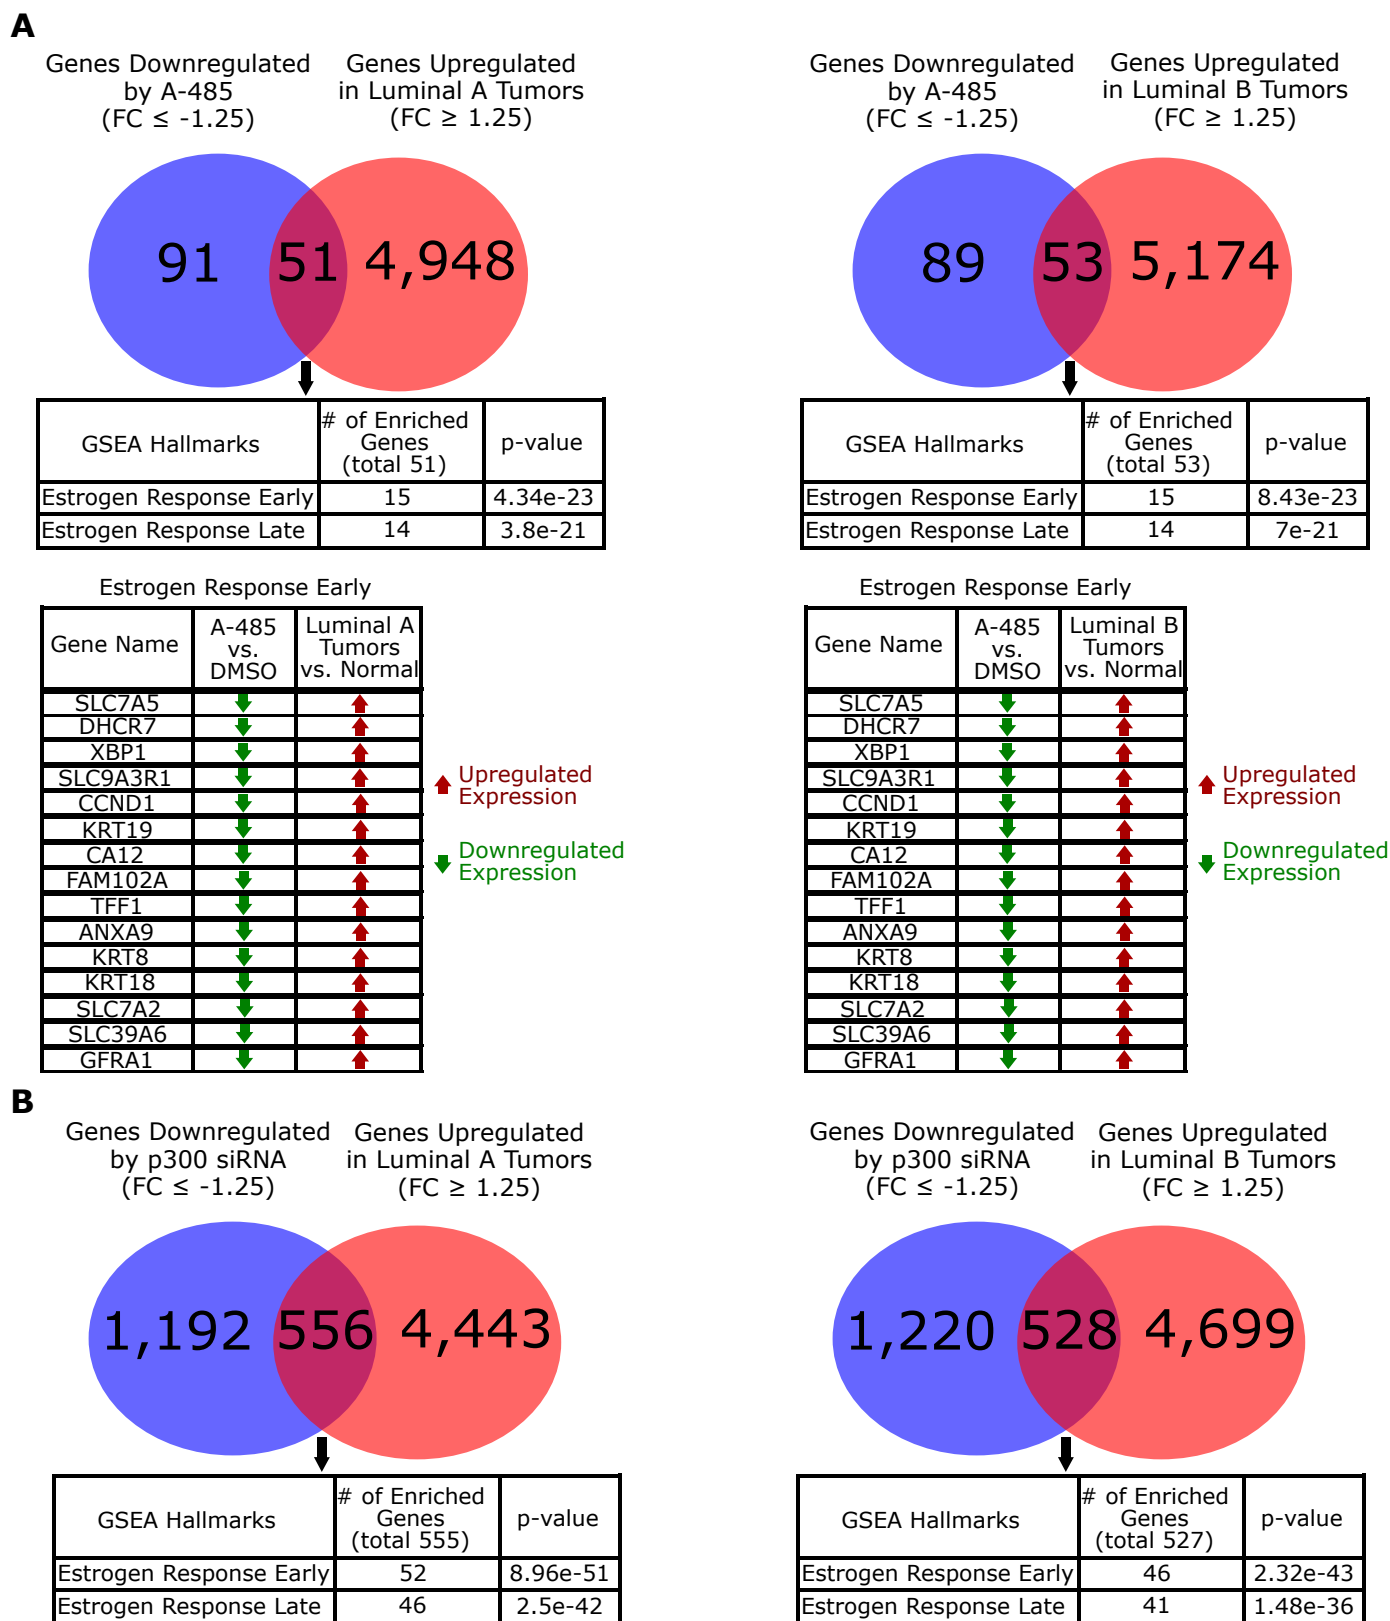

**Figure S5: A-485 and EP300 KD reduce expression of genes that are upregulated in luminal BC**

A) Genes downregulated by A-485 in MCF-7 cells are compared to genes that are upregulated in Luminal A tumors (left) and Luminal B tumors (right). The number of overlapping genes and the top two enriched pathways are shown. Tumor data is from the TCGA.

B) Genes downregulated by p300 siRNA in MCF-7 cells are compared to genes that are upregulated in Luminal A tumors (left) and Luminal B tumors (right). The number of overlapping genes and the top two enriched pathways are shown. Tumor data is from the TCGA.

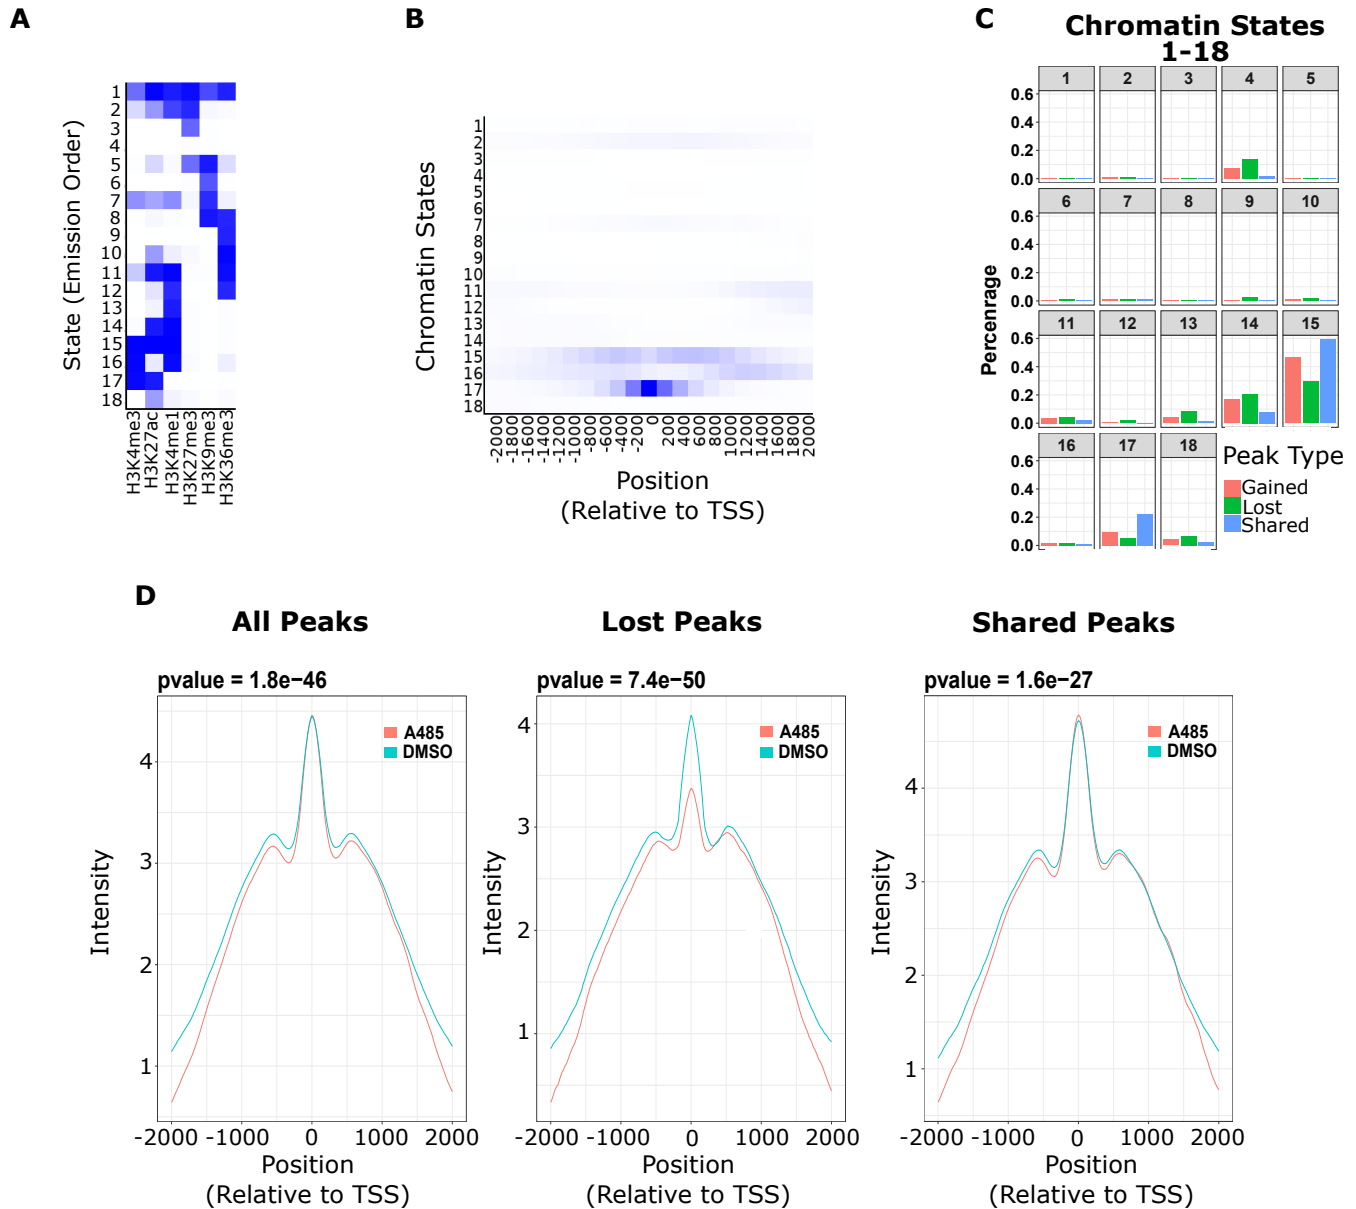

**Figure S6. ChromHMM Analysis in MCF-7 cells**

A) Six histone marks (namely H3K27ac, H3K27me3, H3K36me3, H3K4me1, H3K4me3, H3K9ac, H3K9me3 in MCF-7 cells, data from GEOGSE85158) were used to identify chromatin regions enriched with a different combination of these marks. ChromHMM model was trained using these chromatin marks and 18 states were identified. State 14 is defined as an Active Enhancer, State 15 as Flanking TSS and State 17 as an Active TSS.

(B) Enrichment of different chromatin states identified in (A) relative to the TSS.

(C) The distribution of H3K27ac peaks for the 18 chromatin states are shown for each of the peak types (Lost, Gained and Shared). Active regulatory regions of the genome (State 14, 15 and 17) are the most enriched states in our dataset.

(D) H3K27ac peak intensity at TSS regions defined by Homer for each peak type.

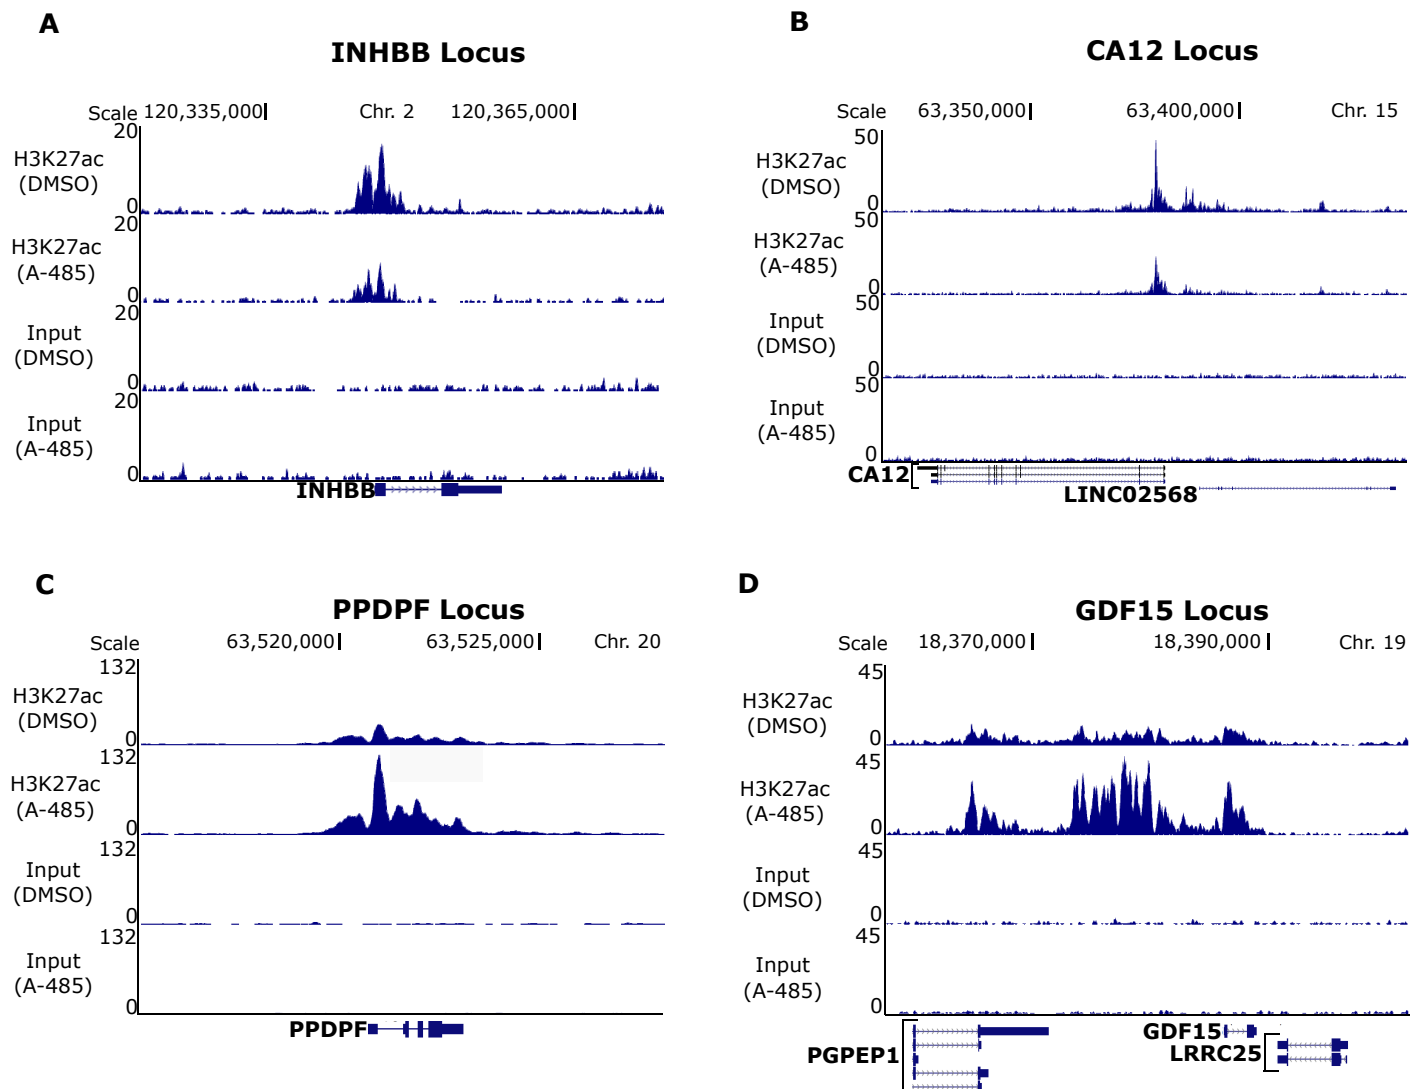

**Figure S7. A-485 reduces H3K27ac at ER target genes but increases H3K27ac at a subset of genes**

(A and B) UCSC genome browser tracks for the INHBB (A) and CA12 (B) locus. A-485 reduces H3K27ac intensity at the INHBB (A) and CA12 (B) promoter.

(C and D) UCSC genome browser tracks for the PPDPF (C) and GDF15 (D) locus. A-485 increases H3K27ac intensity at the PPDPF (C) and GDF15 (D) promoter.



**A**

Genes Associated with  
Active Enhancers  
Downregulated by A-485  
(Lost Peaks)

Genes Upregulated  
in Luminal A Tumors  
(FC  $\geq 1.25$ )

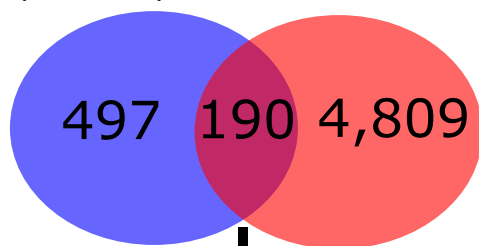

| GSEA Hallmarks          | # of Enriched Genes (total 190) | p-value  |
|-------------------------|---------------------------------|----------|
| Estrogen Response Early | 14                              | 9.04e-13 |
| Estrogen Response Late  | 9                               | 5.15e-7  |

Estrogen Response Early

| Gene Name | A-485 vs. DMSO | Luminal A Tumors vs. Normal |
|-----------|----------------|-----------------------------|
| SEMA3B    | ↓              | ↑                           |
| SULT2B1   | ↓              | ↑                           |
| FLNB      | ↓              | ↑                           |
| RAB31     | ↓              | ↑                           |
| DHRS2     | ↓              | ↑                           |
| ANXA9     | ↓              | ↑                           |
| IGF1R     | ↓              | ↑                           |
| ABAT      | ↓              | ↑                           |
| RARA      | ↓              | ↑                           |
| KDM4B     | ↓              | ↑                           |
| WWC1      | ↓              | ↑                           |
| MLPH      | ↓              | ↑                           |
| THSD4     | ↓              | ↑                           |
| GREB1     | ↓              | ↑                           |

↑ Upregulated Expression

↓ Downregulated Enhancer H3K27ac

Genes Associated with  
Active Enhancers  
Downregulated by A-485  
(Lost Peaks)

Genes Upregulated  
in Luminal B Tumors  
(FC  $\geq 1.25$ )

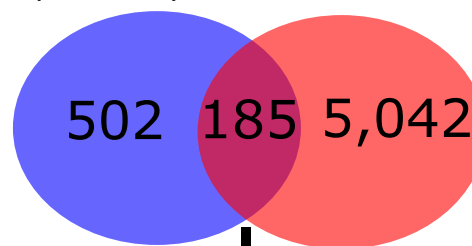

| GSEA Hallmarks          | # of Enriched Genes (total 185) | p-value |
|-------------------------|---------------------------------|---------|
| Estrogen Response Early | 13                              | 1.1e-11 |
| Estrogen Response Late  | 9                               | 4.11e-7 |

Estrogen Response Early

| Gene Name | A-485 vs. DMSO | Luminal B Tumors vs. Normal |
|-----------|----------------|-----------------------------|
| SULT2B1   | ↓              | ↑                           |
| FLNB      | ↓              | ↑                           |
| RAB31     | ↓              | ↑                           |
| DHRS2     | ↓              | ↑                           |
| ANXA9     | ↓              | ↑                           |
| IGF1R     | ↓              | ↑                           |
| ABAT      | ↓              | ↑                           |
| RARA      | ↓              | ↑                           |
| KDM4B     | ↓              | ↑                           |
| WWC1      | ↓              | ↑                           |
| MLPH      | ↓              | ↑                           |
| THSD4     | ↓              | ↑                           |
| GREB1     | ↓              | ↑                           |

↑ Upregulated Expression

↓ Downregulated Enhancer H3K27ac

**Figure S8: A-485 reduces H3K27ac at active enhancers associated with genes that are upregulated in luminal BC**

(A) Genes with active enhancers that have reduced H3K27ac intensity in MCF-7 cells treated with A-485 (lost peaks category) are compared to genes that are upregulated in Luminal A tumors (left) and Luminal B tumors (right). The number of overlapping genes and their pathway enrichment are shown. Tumor data is from the TCGA.
