# Supplementary material for: Pharmacological Inhibition of CBP/p300 Blocks Estrogen Receptor Alpha (ERα) Function through Suppressing Enhancer H3K27 Acetylation in Luminal Breast Cancer
Source: MDPI journal article supplement (doi:10.3390/cancers13112799), 2021-06-04
Supplement: s1 [file s1]

MCF-7 Raw Blots: Figure 2B

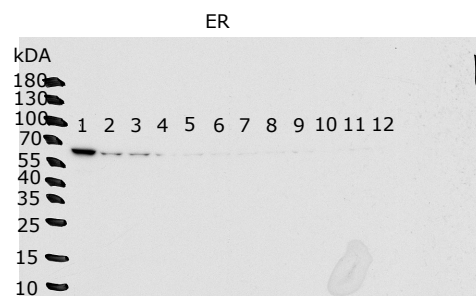

MYC

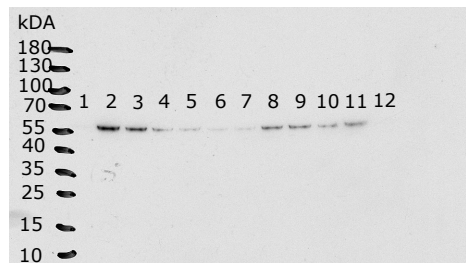

Cyclin D1

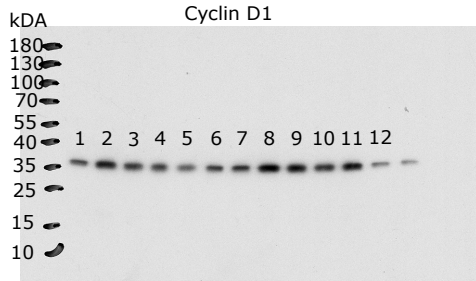

Alpha Tubulin

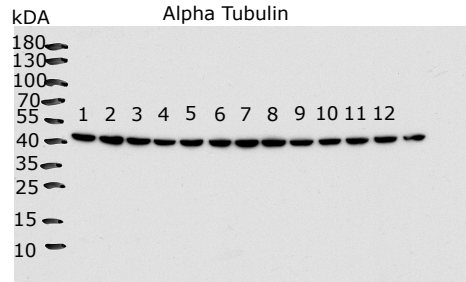

Key for all blots:

1. DMSO
2. Estrogen E2 1 nM
3. E2 + A-485 .25  $\mu$ M
4. E2 + A-485 .75  $\mu$ M
5. E2 + A-485 1.5  $\mu$ M
6. E2 + A-485 2.25  $\mu$ M
7. E2 + A-485 3  $\mu$ M
8. E2 + GNE-049 .25  $\mu$ M
9. E2 + GNE-049 .50  $\mu$ M
10. E2 + GNE-049 .75  $\mu$ M
11. E2 + GNE-049 1  $\mu$ M
12. E2 + Fulvestrant 100 nM

T-47D Raw Blots: Figure 2C

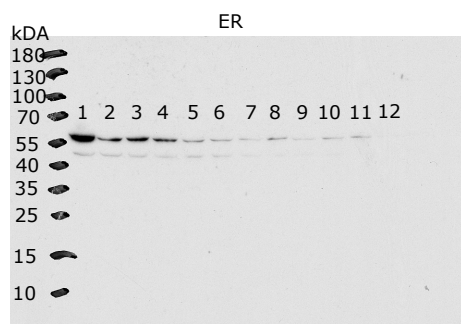

MYC

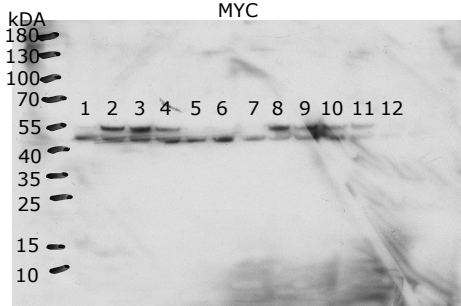

Cyclin D1

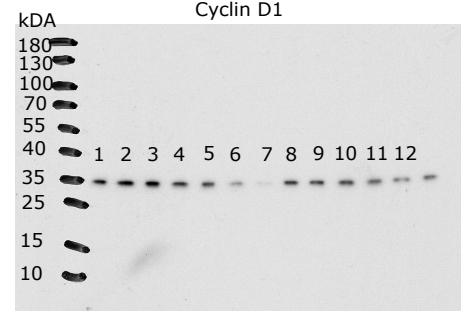

Alpha Tubulin

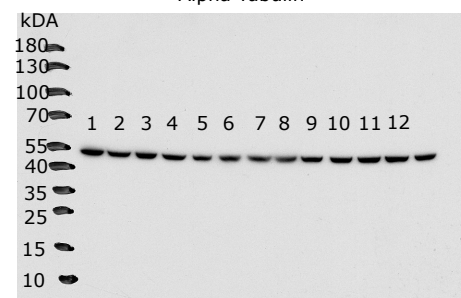

BT-474 Raw Blots: Figure 2D

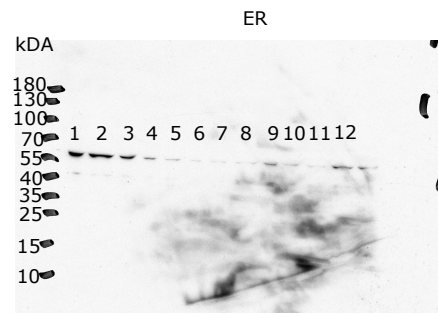

MYC

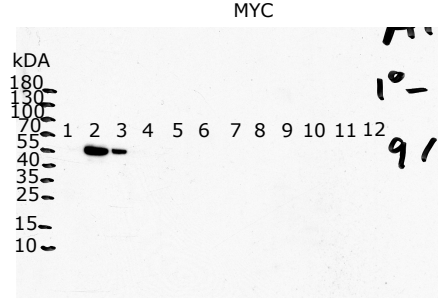

Cyclin D1

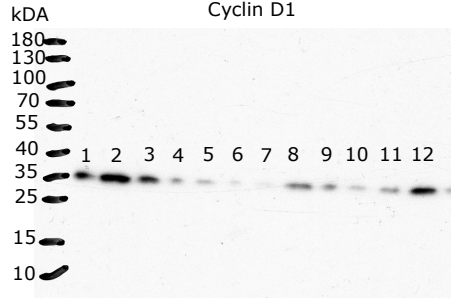

Alpha Tubulin

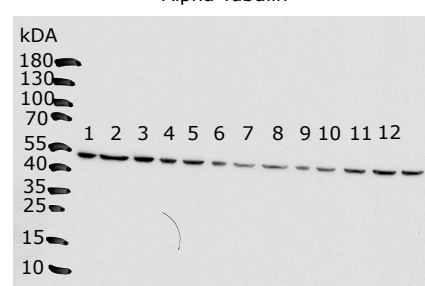

MCF-7 ERE Blot: Figure 2G

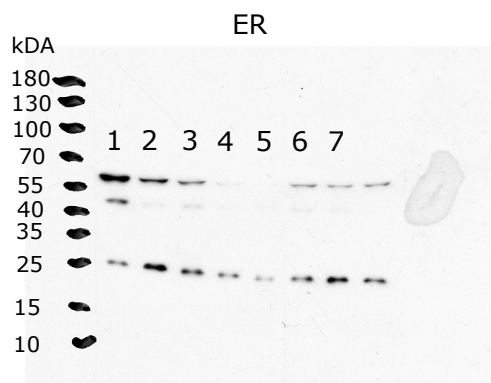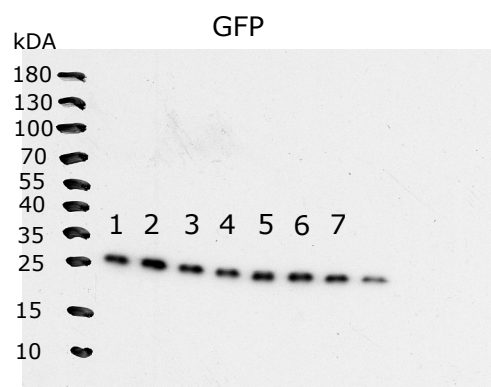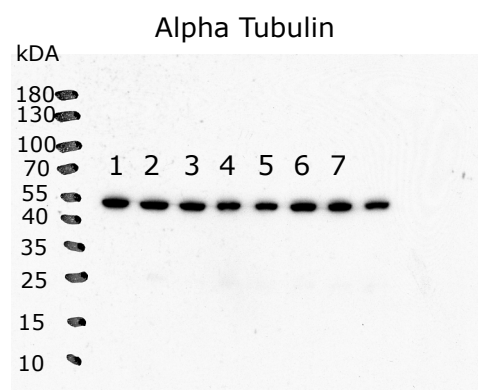

Key:

1. DMSO
2. Estrogen E2 1 nM
3. E2 + A-485 .25  $\mu$ M
4. E2 + A-485 .75  $\mu$ M
5. E2 + A-485 1.5  $\mu$ M
6. E2 + GNE-049 .25  $\mu$ M
7. E2 + GNE-049 .50  $\mu$ M

MCF-7 GREB1 Blot: Figure 2G

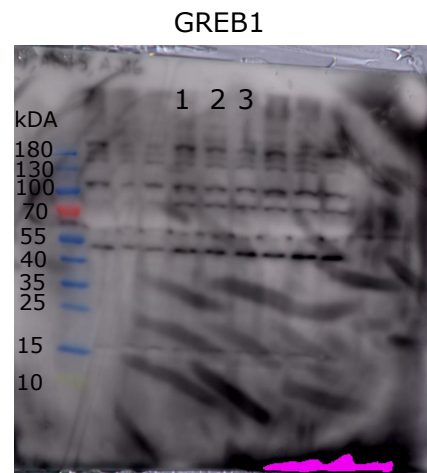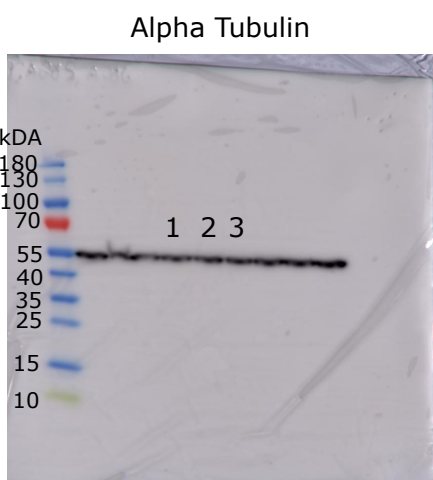

Key:

1. DMSO
2. A-485 3  $\mu$ M
3. GNE-049 1  $\mu$ M



MCF-7 H3ac Raw Blots:  
Corresponds to Figure 4A

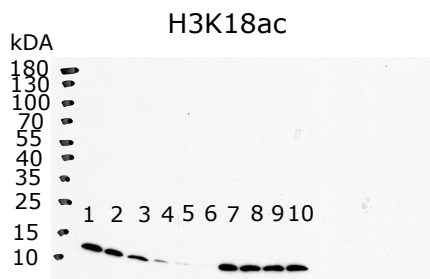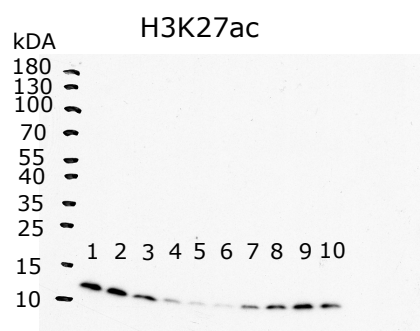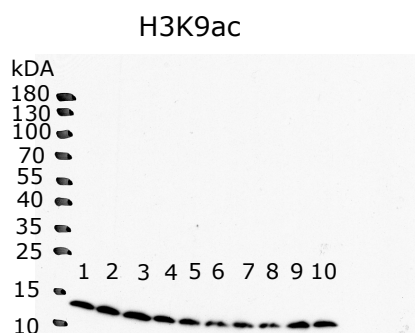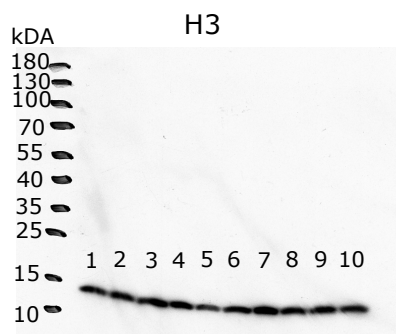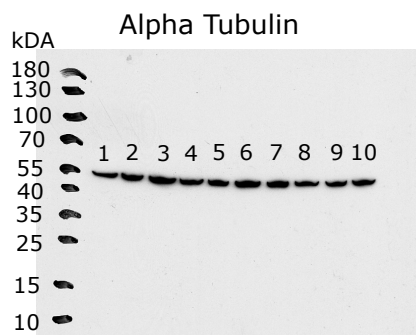

MCF-7 H2Bac Raw Blots:  
Corresponds to Figure 4A

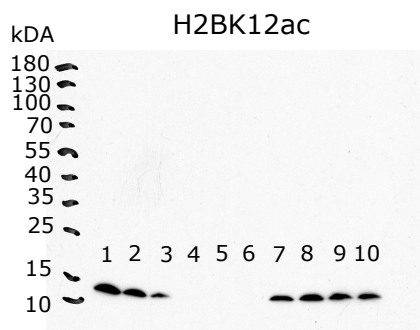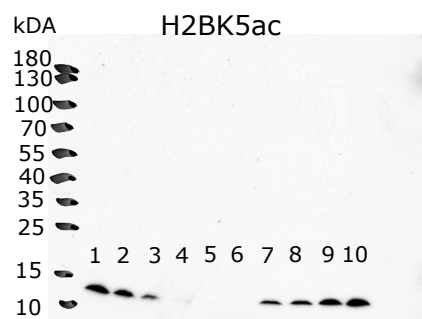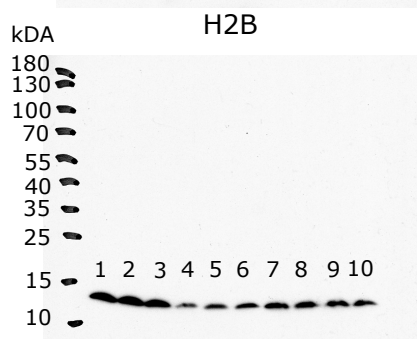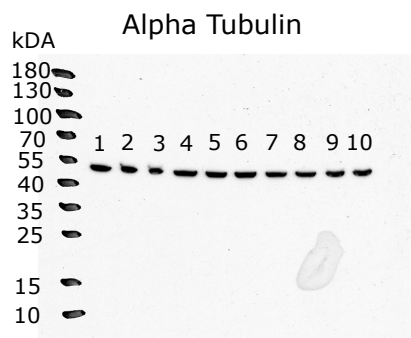

Key for all blots:

1. DMSO
2. A-485 .25  $\mu$ M
3. A-485 .75  $\mu$ M
4. A-485 1.5  $\mu$ M
5. A-485 2.25  $\mu$ M
6. A-485 3  $\mu$ M
7. GNE-049 .25  $\mu$ M
8. GNE-049 .50  $\mu$ M
9. GNE-049 .75  $\mu$ M
10. GNE-049 1  $\mu$ M

T-47D H3ac Raw Blots:  
Figure 4B

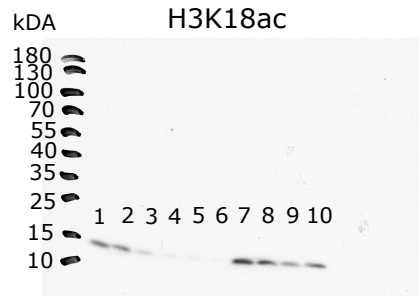

T-47D H2Bac Raw Blots:  
Figure 4B

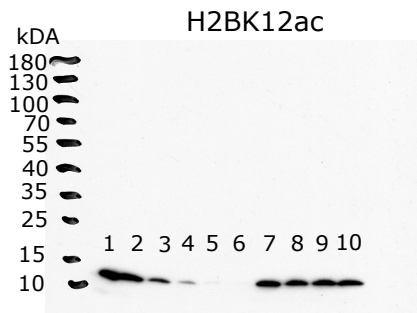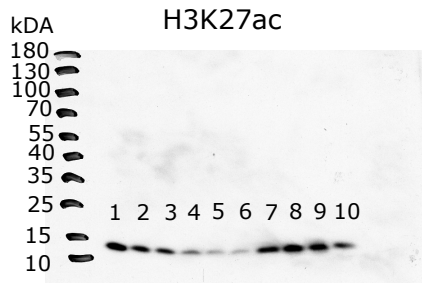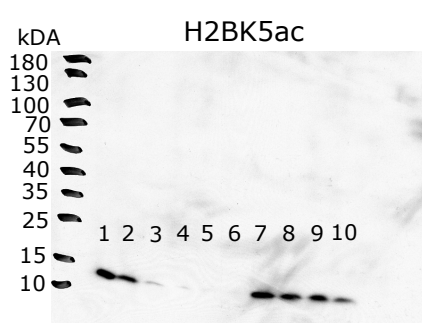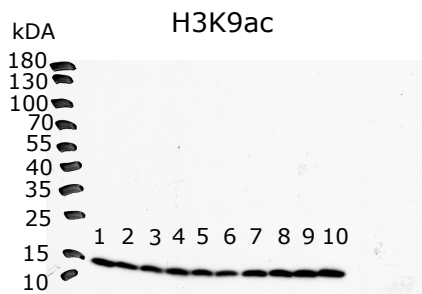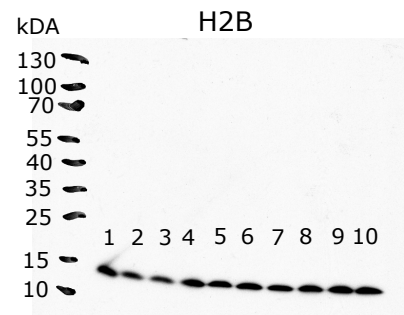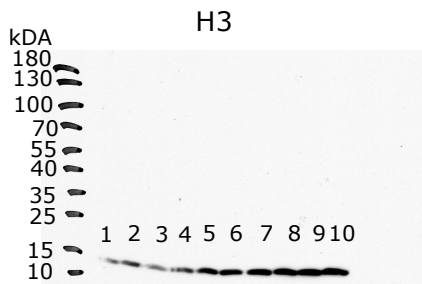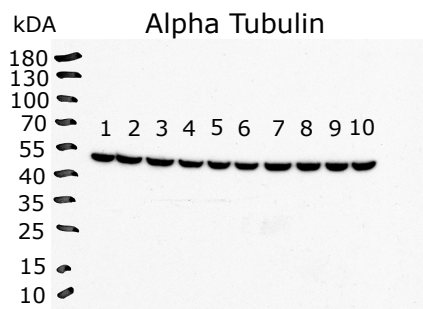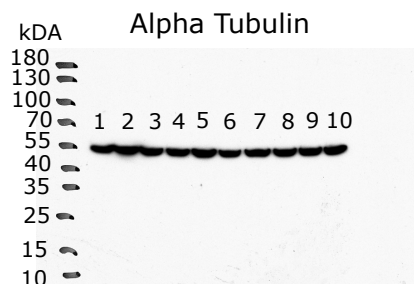

Key for all blots:

1. DMSO
2. A-485 .25  $\mu$ M
3. A-485 .75  $\mu$ M
4. A-485 1.5  $\mu$ M
5. A-485 2.25  $\mu$ M
6. A-485 3  $\mu$ M
7. GNE-049 .25  $\mu$ M
8. GNE-049 .50  $\mu$ M
9. GNE-049 .75  $\mu$ M
10. GNE-049 1  $\mu$ M

BT-474 H3ac Raw Blots:  
Figure 4C  
H3K18ac

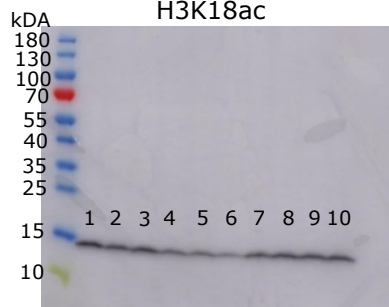

BT-474 H2Bac Raw Blots:  
Figure 4C  
H2BK12ac

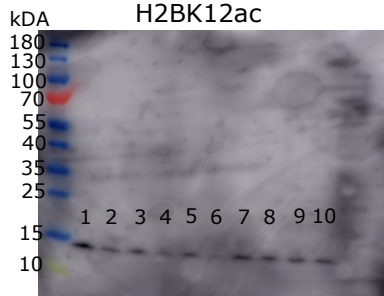

MCF-7 CBP/p300 Raw Blots:  
Figure 4E

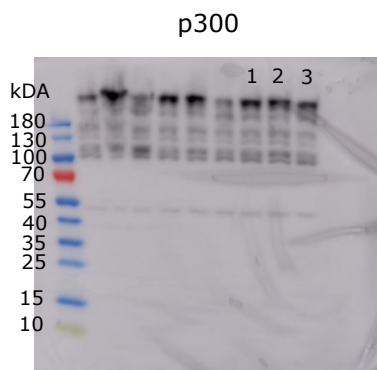

H3K27ac

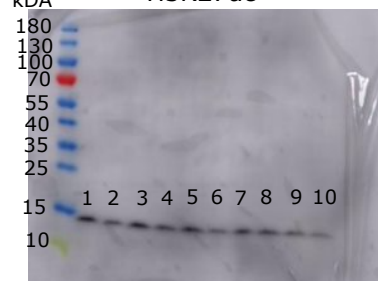

H2BK5ac

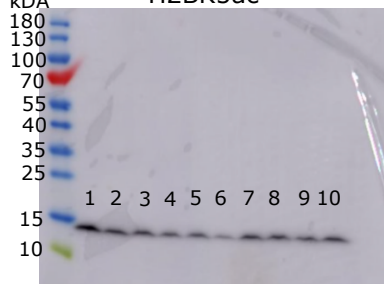

CBP

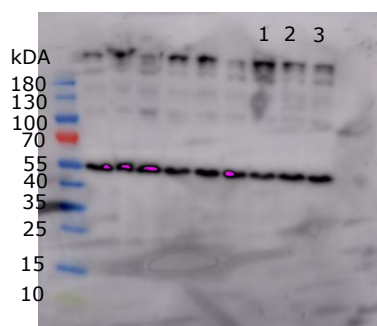

H3K9ac

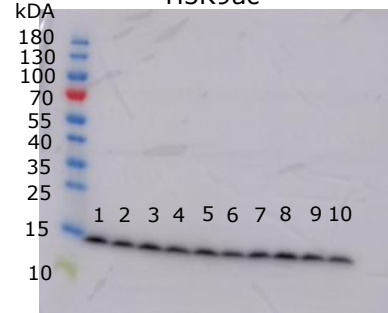

H2B

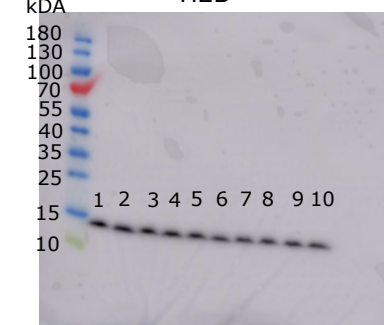

Alpha Tubulin

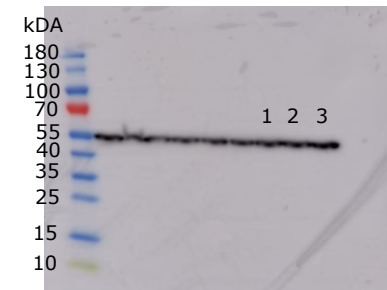

H3

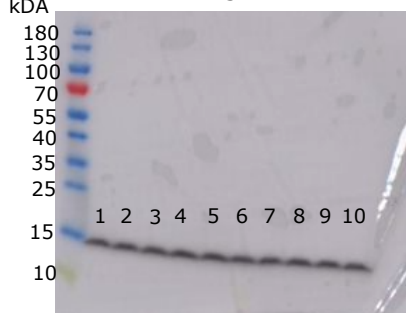

Alpha Tubulin

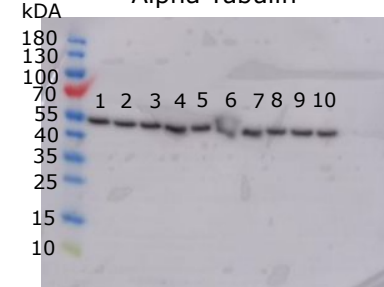

Key for MCF-7 blot:  
1. DMSO  
2. A-485 3.0  $\mu$ M  
3. GNE-049 1  $\mu$ M

Alpha Tubulin

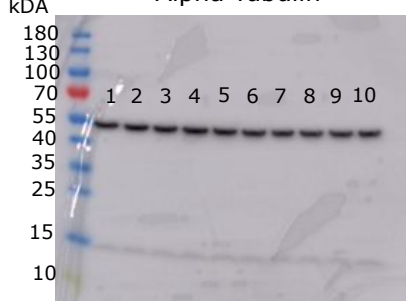

Key for BT-474 blots:

1. DMSO
2. A-485 .25  $\mu$ M
3. A-485 .75  $\mu$ M
4. A-485 1.5  $\mu$ M
5. A-485 2.25  $\mu$ M
6. A-485 3  $\mu$ M
7. GNE-049 .25  $\mu$ M
8. GNE-049 .50  $\mu$ M
9. GNE-049 .75  $\mu$ M
10. GNE-049 1  $\mu$ M
