# Supplementary material for: Pharmacological Inhibition of CBP/p300 Blocks Estrogen Receptor Alpha (ERα) Function through Suppressing Enhancer H3K27 Acetylation in Luminal Breast Cancer
Source: Cancers (Basel). 2021 Jun 4;13(11):2799. doi: 10.3390/cancers13112799 (PMC8200112; doi:10.3390/cancers13112799)
Supplement: Supplementary file 1 [file cancers-13-02799-s001.zip]

Archive with 5 entries (5 files):
- File S1.pdf
- File S2.pdf
- Supplementary Figures.pdf
- Table S1.xlsx
- Table S2.xlsx
