# Supplementary material for: Pharmacological Inhibition of CBP/p300 Blocks Estrogen Receptor Alpha (ERα) Function through Suppressing Enhancer H3K27 Acetylation in Luminal Breast Cancer
Source: Cancers (Basel). 2021 Jun 4;13(11):2799. doi: 10.3390/cancers13112799 (PMC8200112; doi:10.3390/cancers13112799)
Supplement: Supplementary file 1 [file cancers-13-02799-s001.zip › Table S1.xlsx]

## Sheet: p300 binding partners
Gene Name
TP53BP1
MYBL1
AHR
AIRE
GPS2
RUNX1
PRKAA2
TFAP2A
AP1B1
ANAPC5
ANAPC7
APEX1
AR
ARNT
ATF1
ATF2
ATF4
ATF5
ATG7
ATR
ATN1
CTNNB1
MYBL2
SMARCB1
BAG6
BCL6
BTRC
BICP0
BRCA1
SMARCA4
POU3F2
FOS
JUN
MAF
MYB
MYC
CEBPA
CEBPB
CEBPD
CDK5RAP3
CARM1
ALX1
CD44
CDC25B
CDK8
CDK9
CUX1
CDX2
NUDT21
CLTC
CIITA
CITED4
CNOT3
NR2F2
CENPJ
CREB1
CREM
SS18L1
CRX
CTBP1
CTBP2
CCND1
DACH1
DAXX
DBP
DDX24
HAND2
E2F1
E2F5
TCF3
EBF1
EGR1
EID1
EID2
EID3
EIF2B1
KLF1
ELK1
EMB
ETV1
ERAL1
MAPK1
ELF3
ETS1
ETS2
MECOM
EWSR1
EYA1
EYA3
FBXO3
FEN1
FGFR1
FHL2
KLF13
ZFPM2
FOXA2
FOXL1
FOXM1
FOXO1
FOXO3
FOXO4
GABPA
GAK
GAPDH
GATA1
GATA2
GATA3
GATA4
GATA5
GATA6
GCMA
KAT2A
GLI3
GMEB1
GMEB2
NR3C1
HIST3H2A
HIST2H2BE
HIST3H3
HIST4H4
HBP1
HBZ
HDAC1
HDAC6
TCF12
HES6
RAD23A
TGFB1I1
HIF1A
HIPK2
HLF
ONECUT1
HNF1A
HNF1B
HNF4A
HOXA10
HOXA11
HOXA9
HOXB1
HOXB2
HOXB3
HOXB4
HOXB6
HOXB7
HOXB9
HOXD10
HOXD12
HOXD13
HOXD4
HSF1
HTT
CHUK
ING2
IRF1
IRF2
IRF3
IRF7
ITPK1
JMY
JUNB
KLF2
KLF4
KLF5
KLF6
XRCC6
MAFG
MAGEA11
MAML2
ASCL1
MDC1
MDM2
MED25
MEF2D
MEF2C
MAP3K1
CHD4
MIER1
ZBTB17
DUSP1
KMT2A
MN1
NR3C2
MRE11
CITED1
MSH2
MSH6
RPS6KA5
MSX1
MTF1
MYOD1
CHD2
NCOR1
NBN
NEDD1
IKBKG
NEUROD1
NF-E2
NFKB1
RELA
NFYA
NFATC2
NFATC1
NFATC4
NEUROG1
NOTCH1
NFE2L2
NUP93
NUP98
NR4A1
OGG1
OLIG2
KAT2B
NFKB2
NPAT
ING5
ING4
ING1
SERTAD1
CITED2
MAPK14
TP53
HERC1
TP63
DDX5
DDX17
TP73
NURP1
REG3A
PARP1
PAX6
PAX3
PAX5
PAX8
SUB1
PCNA
PDX1
ETV4
PELP1
PPARGC1A
PHOX2B
PIAS1
PIAS3
PCMT1
POU1F1
PLAG1
PLAGL2
PLZF
PML
POLB
POLR2A
RPS6KA1
PPARA
PPARG
PR
CHD9
PRMT5
PROX1
PTEN
SPI1
VHL
RAD50
RARA
RB1
RBBP4
RBCK1
KNPA2
RECQL4
NRIP1
DHX9
ROCK2
RORA
RPS6KA3
RUNX2
RUNX3
KHDRBS1
SATB1
NR5A1
SGK1
SIRT1
SIRT2
SNW1
POU2F3
SKP2
SMAD1
SMAD2
SMAD3
SMAD4
SMAD7
DCP1A
SNIP1
SOX2
SOX4
SOX9
SP1
SP3
SPIB
NCOA1
SRCAP
SREBF1
SREBF2
SRF
STAT1
STAT2
STAT3
STAT4
STAT5A
STAT5B
STAT6
TTC5
PSMC5
BIRC5
SS18
TBX21
TAF1
TAF15
TAL1
TAZ
TBP
TDG
GTF2B
GTF2E2
GTF2F1
GTF3C1
ZBTB7B
NCOA2
TAX1BP3
FUS
TLX1
CRTC2
TNP2
THRB
TARBP2
TRERF1
TRIP10
TSG101
TTF1
TWIST
UBTF
VDR
VRK1
VRK2
WRN
WT1
XAF1
YAP
YBX1
YY1
ZNF148
ZBTB2
ZEB1
ZNF521
ESR1
NCOA3
AKT1

## Sheet: p300 partners_Essential MCF-7
Gene Name	Gene Effect
ATR	-1.25192
BIRC5	-1.57394
CCND1	-1.86384
CDK9	-1.28367
CHD4	-1.3752
CLTC	-1.25756
CNOT3	-1.44059
DDX5	-1.00022
EIF2B1	-1.10384
ESR1	-1.30276
EWSR1	-1.04382
GATA3	-1.26798
GTF2B	-1.67544
GTF2E2	-1.1973
MYC	-1.63318
NEDD1	-1.5012
NUDT21	-1.69329
NUP93	-1.53376
NUP98	-1.22457
PCNA	-1.8923
PELP1	-1.03672
PRMT5	-1.44527
PSMC5	-1.11465
RBBP4	-1.09228
SMARCB1	-1.15988
SNW1	-1.30989
TSG101	-1.01545
UBTF	-1.66
XRCC6	-1.49627
YBX1	-1.06515
YY1	-1.25686

## Sheet: MCF-7 Essential Genes
Gene Name	Gene Effect
AARS	-1.74974
AATF	-1.08681
ABCB7	-1.28081
ABCE1	-1.31316
ACO2	-1.0162
ACTL6A	-1.50206
ACTR10	-1.12048
ACTR2	-1.05582
ADSL	-1.3565
AFG3L2	-1.39388
AKIRIN2	-1.22993
ALG11	-1.37157
ALG2	-1.2167
ALYREF	-1.13223
ANAPC1	-1.02714
ANAPC10	-1.09197
ANAPC2	-1.00365
ANAPC4	-1.06265
ANKLE2	-1.92981
AQR	-1.31637
ARCN1	-1.48261
ARL2	-1.32856
ARMC7	-1.08391
ATP1A1	-1.2047
ATP2A2	-1.54717
ATP5F1B	-1.31141
ATP5F1D	-1.1439
ATP5MF	-1.10026
ATP6V0B	-1.49991
ATP6V0C	-1.73949
ATP6V0D1	-1.08394
ATP6V1A	-1.76662
ATP6V1B2	-1.49567
ATP6V1E1	-1.18299
ATP6V1G1	-1.38684
ATR	-1.25192
AURKA	-1.04371
AURKB	-1.65884
BANF1	-1.5398
BIRC5	-1.57394
BOP1	-1.04414
BRF2	-1.51566
BRIX1	-1.17284
BUB1B	-1.25442
BUB3	-1.54683
BUD23	-1.59399
BUD31	-1.4662
BYSL	-1.14636
C1orf109	-1.21087
CACTIN	-1.20302
CAPZB	-1.4424
CARS	-1.81537
CCDC84	-1.43097
CCNA2	-1.22434
CCND1	-1.86384
CCNH	-1.00381
CCNK	-1.03275
CCT2	-1.09586
CCT3	-1.95895
CCT4	-1.59195
CCT5	-1.15667
CCT6A	-1.22594
CCT7	-1.03472
CCT8	-1.14959
CDC123	-1.85102
CDC16	-1.76883
CDC20	-1.63501
CDC23	-1.49089
CDC27	-1.77518
CDC37	-1.31841
CDC45	-1.85814
CDC5L	-1.50111
CDC6	-1.55684
CDC7	-1.87212
CDC73	-1.18307
CDCA8	-1.09721
CDK1	-1.70661
CDK4	-1.49453
CDK7	-1.32106
CDK9	-1.28367
CDT1	-1.60215
CENPK	-1.35388
CENPN	-1.32618
CENPW	-1.2604
CEP192	-1.33024
CFAP298	-1.50743
CHAF1A	-1.26791
CHAF1B	-1.59227
CHD4	-1.3752
CHEK1	-1.5274
CHERP	-1.01833
CHMP2A	-1.76813
CHMP4B	-1.14004
CHMP6	-1.48025
CIAO1	-1.16502
CIAO3	-1.49484
CKAP5	-1.73715
CLNS1A	-1.56542
CLP1	-1.63649
CLSPN	-1.06587
CLTC	-1.25756
CMPK1	-1.11105
CNOT3	-1.44059
COPA	-1.66502
COPB1	-1.86453
COPB2	-1.74847
COPE	-1.30481
COPG1	-1.33337
COPS5	-1.42624
COPS6	-1.24928
COPS8	-1.13967
COPZ1	-1.1065
CPSF2	-1.15761
CPSF3	-1.18318
CPSF4	-1.41361
CRCP	-1.22179
CRNKL1	-1.35133
CSE1L	-1.59575
CSNK1A1	-1.25953
CSNK2B	-1.39107
CSTF3	-1.35741
CTCF	-1.24641
CTDP1	-1.62924
CTR9	-1.05056
CWC22	-1.57227
DAD1	-1.27923
DARS	-1.21625
DBR1	-1.50695
DCLRE1B	-1.05347
DCTN5	-1.04091
DDB1	-1.36695
DDOST	-1.00912
DDX10	-1.30198
DDX18	-1.42598
DDX20	-1.1035
DDX21	-1.17977
DDX27	-1.01841
DDX3X	-1.42575
DDX41	-1.11987
DDX42	-1.08629
DDX47	-1.34377
DDX49	-1.44334
DDX5	-1.00022
DDX51	-1.21591
DDX52	-1.02531
DDX54	-1.38952
DDX55	-1.31961
DDX56	-1.74303
DHDDS	-1.89312
DHX15	-1.06219
DHX16	-1.14274
DHX33	-1.20313
DHX37	-1.50988
DHX8	-1.36056
DKC1	-1.49348
DMAP1	-1.28001
DNAJC17	-1.25486
DNM2	-1.52947
DONSON	-1.75649
DPAGT1	-1.0485
DTL	-1.93707
DTYMK	-1.28337
DUT	-1.59133
DYNC1H1	-1.32475
DYNC1I2	-1.2938
DYNLRB1	-1.83344
EBNA1BP2	-1.15212
ECD	-1.61583
ECT2	-1.0516
EEF1A1	-1.05875
EEF2	-1.9782
EFTUD2	-1.48569
EIF1	-1.39149
EIF1AD	-1.24018
EIF1AX	-1.48424
EIF2B1	-1.10384
EIF2B2	-1.15193
EIF2B3	-1.55149
EIF2B4	-1.38219
EIF2B5	-1.06349
EIF2S1	-1.49331
EIF2S2	-1.16378
EIF2S3	-1.6692
EIF3A	-1.8254
EIF3B	-1.32413
EIF3D	-1.41277
EIF3F	-1.28106
EIF3G	-1.36741
EIF3H	-1.07848
EIF3I	-1.43579
EIF3M	-1.31331
EIF4A1	-1.39643
EIF4A3	-1.71429
EIF4G1	-1.07451
EIF5	-1.20563
EIF5A	-1.16793
EIF6	-1.70861
ELAC2	-1.19525
ELL	-1.23092
ELOB	-1.47901
EP400	-1.05999
EPRS	-1.53432
ERCC2	-1.12414
ERCC3	-1.09345
ERH	-1.59757
ESPL1	-1.751
ESR1	-1.30276
ESS2	-1.23311
ETF1	-1.19117
EWSR1	-1.04382
EXOSC2	-1.33426
EXOSC3	-1.18859
EXOSC4	-1.258
EXOSC5	-1.02987
EXOSC6	-1.32843
EXOSC7	-1.03308
EXOSC8	-1.08191
FARSA	-1.42999
FARSB	-1.69348
FAU	-1.78025
FBL	-1.14387
FDPS	-1.12549
FDX2	-1.08067
FIP1L1	-1.00544
FNTA	-1.21213
FNTB	-1.39154
FOXA1	-1.64831
FTSJ3	-1.04847
GARS	-1.05414
GATA3	-1.26798
GBF1	-1.03862
GEMIN5	-1.15922
GFER	-1.02916
GGPS1	-1.04956
GGTLC2	-1.06849
GINS1	-1.5899
GINS2	-1.62976
GINS3	-1.02889
GINS4	-1.35634
GMPS	-1.20123
GNB1L	-1.02349
GNL2	-1.20067
GNL3	-1.36858
GNL3L	-1.00007
GOSR2	-1.06911
GPKOW	-1.05306
GPN1	-1.42982
GPN2	-1.64184
GPN3	-1.10878
GRPEL1	-1.32254
GRWD1	-1.42397
GSPT1	-1.68674
GTF2A2	-1.17007
GTF2B	-1.67544
GTF2E1	-1.00078
GTF2E2	-1.1973
GTPBP4	-1.50168
GUK1	-1.12036
H2AFX	-1.07304
HARS	-1.41583
HAUS1	-1.65199
HAUS3	-1.06238
HAUS5	-1.37956
HAUS6	-1.23961
HAUS7	-1.43948
HCFC1	-1.48197
HDAC3	-1.03726
HEATR1	-1.84048
HINFP	-1.3946
HIRA	-1.07543
HIST1H2BC	-1.17837
HIST1H2BJ	-1.07388
HIST1H2BN	-1.58581
HIST2H3D	-1.29827
HMGCS1	-1.25346
HMGN2	-1.04384
HNRNPC	-1.09281
HNRNPK	-1.68862
HNRNPL	-1.35561
HNRNPU	-1.04186
HSPA5	-1.11541
HSPA9	-1.51812
HSPD1	-1.22055
HSPE1	-1.79845
HTATSF1	-1.10342
HYPK	-1.0725
IARS	-1.7028
IGBP1	-1.42859
ILF3	-1.41228
IMP3	-1.26836
IMP4	-1.33318
INCENP	-1.0981
INTS1	-1.26418
INTS11	-1.70595
INTS7	-1.16293
INTS8	-1.01263
INTS9	-1.63438
IPO11	-1.1891
IPO13	-1.42003
ISCU	-1.39602
ISG20L2	-1.24357
ISY1	-1.11834
KANSL3	-1.34043
KARS	-1.45941
KAT8	-1.5009
KIF11	-1.78868
KIF18A	-1.30416
KIF23	-1.4297
KPNB1	-1.6048
KRR1	-1.23513
KRT8	-1.23302
LARS	-1.2208
LAS1L	-1.03492
LETM1	-1.07388
LIAS	-1.07185
LONP1	-1.43529
LRR1	-1.63607
LSG1	-1.10838
LSM2	-1.70057
LSM3	-1.19097
LSM4	-1.27325
LSM7	-1.8112
LSM8	-1.14682
LTO1	-1.51847
LUC7L3	-1.67588
LYRM4	-1.45089
MAD2L1	-1.06614
MAGOH	-1.08639
MAK16	-1.63653
MARS	-1.39355
MARS2	-1.06085
MASTL	-1.47082
MAT2A	-1.43008
MCM2	-1.62398
MCM3AP	-1.01215
MCM4	-1.17994
MCM5	-1.57735
MCM6	-1.30375
MCM7	-1.71306
MDN1	-1.35854
MEAF6	-1.06282
MED11	-1.69312
MED14	-1.35857
MED17	-1.1603
MED18	-1.16515
MED20	-1.27512
MED22	-1.1589
MED26	-1.13228
MED30	-1.47577
MED4	-1.15265
MED6	-1.15727
METTL16	-1.00805
MFAP1	-1.51735
MLST8	-1.0587
MMS22L	-1.22274
MPHOSPH10	-1.16387
MRGBP	-1.05685
MRPL27	-1.03159
MRPL34	-1.08853
MRPL37	-1.0638
MRPL38	-1.01205
MRPL4	-1.10224
MRPL57	-1.08226
MRPS21	-1.05709
MSTO1	-1.01762
MTBP	-1.17209
MTOR	-1.32804
MTPAP	-1.09008
MTREX	-1.1274
MYC	-1.63318
MZT1	-1.08457
NAA10	-1.22823
NAA15	-1.25922
NAA20	-1.15578
NAA50	-1.38961
NACA	-1.12416
NAPA	-1.45032
NARS	-1.67762
NAT10	-1.51645
NCAPD2	-1.1734
NCAPG	-1.51149
NCAPH2	-1.07195
NCBP1	-1.04968
NCBP2	-1.20993
NCL	-1.27606
NDC80	-1.25587
NDUFA11	-1.11251
NDUFA6	-1.0507
NDUFB7	-1.15519
NEDD1	-1.5012
NEDD8	-1.5949
NELFA	-1.18153
NFS1	-1.40956
NIFK	-1.52809
NIP7	-1.69257
NKAP	-1.43658
NLE1	-1.20556
NOB1	-1.37444
NOC4L	-1.22124
NOL10	-1.13603
NOL6	-1.41167
NOP10	-1.23794
NOP14	-1.07292
NOP16	-1.20365
NOP2	-1.06226
NOP56	-1.7055
NOP58	-1.45308
NOP9	-1.00179
NPIPA5	-1.15288
NPLOC4	-1.39309
NSA2	-1.13536
NSF	-1.62291
NSL1	-1.11244
NUDC	-1.08957
NUDT21	-1.69329
NUF2	-1.46148
NUP133	-1.53753
NUP155	-1.48548
NUP160	-1.33895
NUP205	-1.00784
NUP214	-1.3165
NUP43	-1.41455
NUP85	-1.46061
NUP88	-1.16108
NUP93	-1.53376
NUP98	-1.22457
NUS1	-1.26013
NUTF2	-1.29784
NVL	-1.43638
NXF1	-1.06508
OGT	-1.55036
ORC6	-1.75541
OSBP	-1.02661
PABPC1	-1.00551
PABPN1	-1.17014
PAF1	-1.04998
PAFAH1B1	-1.55004
PAK1IP1	-1.23248
PAM16	-1.34453
PCBP1	-1.28584
PCF11	-1.16684
PCID2	-1.27265
PCNA	-1.8923
PDCD11	-1.13861
PDCD2	-1.10608
PDPK1	-1.10844
PDRG1	-1.30237
PELP1	-1.03672
PES1	-1.17978
PFDN2	-1.48398
PFDN6	-1.51155
PGD	-1.20863
PHB	-1.50595
PHB2	-1.88977
PHF5A	-1.95163
PIK3C3	-1.1579
PIK3CA	-1.02143
PLK1	-1.98538
PLK4	-1.19285
PLRG1	-1.20613
PMF1	-1.23767
PMPCA	-1.26342
PMPCB	-1.42254
PNO1	-1.07326
PNPT1	-1.05838
POGZ	-1.03462
POLA2	-1.32469
POLD1	-1.74808
POLD2	-1.11806
POLD3	-1.59102
POLE	-1.48659
POLE2	-1.19155
POLR1A	-1.23554
POLR1B	-1.13692
POLR1C	-1.565
POLR2B	-1.68449
POLR2C	-1.60521
POLR2D	-1.53057
POLR2E	-1.48921
POLR2F	-1.49551
POLR2G	-1.39759
POLR2I	-1.35059
POLR2K	-1.28116
POLR2L	-2.14724
POLR3A	-1.92815
POLR3B	-1.52387
POLR3C	-1.00682
POLR3H	-1.6223
POLR3K	-1.3226
POP5	-1.50455
PPAN	-1.32558
PPIL1	-1.32293
PPIL2	-1.20422
PPIL4	-1.11277
PPP1R10	-1.0357
PPP1R8	-1.03184
PPP2CA	-1.30254
PPP2R1A	-1.1942
PPP4C	-1.17231
PPWD1	-1.35854
PRC1	-1.00306
PRELID1	-1.75696
PRELID3B	-1.33771
PRIM1	-1.50366
PRMT1	-1.39423
PRMT5	-1.44527
PRPF19	-1.99262
PRPF31	-1.95982
PRPF38A	-1.74507
PRPF38B	-1.58818
PRPF4	-1.03273
PRPF40A	-1.28019
PRPF6	-1.15338
PRPF8	-1.48088
PSMA1	-1.97767
PSMA2	-1.47944
PSMA3	-1.72872
PSMA4	-1.15756
PSMA5	-1.51828
PSMA6	-1.86994
PSMA7	-1.61615
PSMB2	-1.68316
PSMB3	-2.10023
PSMB4	-1.51565
PSMB5	-1.91652
PSMB6	-1.22442
PSMB7	-1.06557
PSMC1	-1.141
PSMC2	-1.41879
PSMC3	-1.47081
PSMC4	-1.30839
PSMC5	-1.11465
PSMC6	-1.15672
PSMD1	-1.39303
PSMD11	-2.00051
PSMD12	-1.14263
PSMD13	-1.39443
PSMD14	-1.39592
PSMD2	-1.30812
PSMD3	-1.84444
PSMD4	-1.02601
PSMD7	-1.38842
PSMG4	-1.26228
PUF60	-1.89981
PWP2	-1.23092
QARS	-1.4982
RABGGTA	-1.22576
RABGGTB	-1.51032
RACGAP1	-1.17733
RACK1	-1.73623
RAD21	-1.27269
RAD51	-1.64064
RAD51C	-1.22874
RAE1	-1.13042
RAN	-2.39766
RANGAP1	-1.48541
RBBP4	-1.09228
RBM14	-1.4659
RBM22	-1.38807
RBM25	-1.34152
RBM39	-1.28896
RBMX	-1.2432
RBMXL1	-1.05949
RCC1	-1.401
RCL1	-1.2112
RFC2	-1.1771
RFC3	-1.30315
RFC5	-1.23937
RIOK2	-1.12366
RNF113A	-1.47046
RNGTT	-1.52684
RNMT	-1.01959
RNPC3	-1.54702
ROMO1	-1.30993
RPA1	-1.859
RPA2	-1.40503
RPA3	-1.569
RPAIN	-1.22282
RPAP1	-1.56353
RPAP2	-1.22578
RPF2	-1.05664
RPL10A	-1.34313
RPL11	-1.75901
RPL12	-1.57423
RPL13	-1.58765
RPL13A	-1.27798
RPL14	-1.50226
RPL15	-1.53086
RPL17	-1.50498
RPL18	-1.73319
RPL18A	-1.85699
RPL19	-1.88611
RPL23	-1.85171
RPL23A	-1.72762
RPL24	-1.40266
RPL26	-1.37749
RPL27	-1.52591
RPL27A	-1.87176
RPL3	-1.90407
RPL30	-1.28946
RPL31	-1.95039
RPL32	-1.40738
RPL34	-1.56233
RPL35	-1.44545
RPL36	-1.79266
RPL37	-1.1111
RPL37A	-1.48202
RPL38	-1.21489
RPL4	-1.38039
RPL5	-1.84852
RPL6	-1.54646
RPL7	-1.51893
RPL7A	-1.33072
RPL8	-1.79484
RPLP0	-1.38184
RPLP1	-1.29807
RPLP2	-1.67803
RPP14	-1.33369
RPP21	-1.05965
RPS11	-1.94946
RPS12	-1.56679
RPS13	-1.64891
RPS14	-1.67537
RPS15	-1.77892
RPS15A	-1.54225
RPS16	-1.91867
RPS18	-1.57604
RPS19	-1.68149
RPS2	-1.25719
RPS20	-2.04223
RPS21	-1.08403
RPS23	-1.7768
RPS24	-1.53061
RPS25	-1.07112
RPS27A	-1.09397
RPS28	-2.03485
RPS29	-1.88546
RPS3	-1.73475
RPS4X	-1.85975
RPS5	-1.61221
RPS6	-1.61389
RPS7	-1.54343
RPS8	-1.78392
RPS9	-1.68906
RRM1	-1.89529
RRM2	-1.54513
RRN3	-1.3821
RRP12	-1.26964
RRP7A	-1.27568
RRP9	-1.14866
RRS1	-1.37961
RSL1D1	-1.35563
RSL24D1	-1.50264
RUVBL1	-1.44331
RUVBL2	-1.64555
SACM1L	-1.53146
SAE1	-1.50966
SAP18	-1.3969
SAP30BP	-1.08214
SARS	-2.06303
SART1	-1.06448
SART3	-1.5584
SBDS	-1.64632
SBNO1	-1.18332
SCAP	-1.05893
SCFD1	-1.17013
SDAD1	-1.11565
SDE2	-1.31266
SEC13	-1.00777
SEC61A1	-1.61729
SEC61G	-1.20152
SEH1L	-1.54291
SENP6	-1.00537
SETD1A	-1.04522
SF1	-1.82745
SF3A1	-1.59382
SF3A2	-1.70394
SF3A3	-1.81299
SF3B1	-1.34796
SF3B3	-1.925
SF3B4	-1.32613
SF3B5	-1.99457
SF3B6	-1.6043
SFPQ	-1.41718
SKP1	-1.06823
SLC39A7	-1.12353
SLC7A6OS	-1.0997
SMARCB1	-1.15988
SMC1A	-1.22948
SMC2	-1.24695
SMC4	-1.38661
SMG1	-1.10132
SMG5	-1.31872
SMG6	-1.23115
SMNDC1	-1.21944
SMU1	-2.13617
SNAPC1	-1.33549
SNAPC2	-1.45717
SNAPC3	-1.10273
SNRNP200	-2.11607
SNRNP25	-1.26885
SNRNP27	-1.24701
SNRNP35	-1.31899
SNRNP40	-1.18777
SNRNP70	-1.33598
SNRPA1	-1.67141
SNRPB	-1.49322
SNRPD1	-2.08391
SNRPD2	-1.54368
SNRPD3	-1.78641
SNRPE	-2.03843
SNRPF	-2.03719
SNRPG	-1.57419
SNU13	-1.92818
SNUPN	-1.17656
SNW1	-1.30989
SOD1	-1.41252
SOD2	-1.27543
SON	-1.38576
SPC24	-1.82629
SPC25	-1.26603
SPCS3	-1.11112
SPOUT1	-1.42754
SRBD1	-1.15268
SRP54	-1.61188
SRRM1	-1.16959
SRSF1	-1.38816
SRSF11	-1.46104
SRSF2	-1.71079
SRSF3	-1.619
SRSF7	-1.8452
SS18L2	-1.37102
SSRP1	-1.53212
SSU72	-1.25179
STX5	-1.10901
SUMO2	-1.08143
SUPT16H	-1.41253
SUPT5H	-1.42133
SUPT6H	-1.63007
SYF2	-1.17079
TAF6	-1.0285
TANGO6	-1.47435
TARS	-1.49964
TBCA	-1.01215
TBCB	-1.60826
TBL3	-1.23302
TCP1	-1.64614
THOC1	-1.02145
THOC2	-1.38759
THOC3	-1.00982
TIMELESS	-1.10516
TIMM13	-1.17797
TIMM29	-1.0461
TIMM44	-1.22444
TINF2	-1.12021
TNPO3	-1.26348
TOMM22	-1.30283
TOMM40	-1.0884
TONSL	-1.29683
TOP2A	-1.54209
TOP3A	-1.20652
TOPBP1	-1.20019
TPR	-1.08988
TPT1	-1.03753
TPX2	-1.2248
TRAPPC1	-1.27313
TRAPPC11	-1.09694
TRAPPC3	-1.77278
TRAPPC4	-1.18711
TRAPPC5	-1.01412
TRAPPC8	-1.50829
TRIAP1	-1.10895
TRMT112	-1.56642
TRNT1	-1.44275
TRRAP	-1.14797
TSG101	-1.01545
TSR1	-1.32569
TSR2	-1.60317
TTC1	-1.13455
TTC27	-1.4839
TTI1	-1.15121
TUBA1B	-1.30208
TUBA1C	-1.06651
TUBB	-1.47903
TUBG1	-1.60178
TUBGCP2	-1.30469
TUBGCP3	-1.48998
TUBGCP4	-1.29786
TUBGCP5	-1.11753
TUBGCP6	-1.30706
TUT1	-1.52764
TWISTNB	-1.54572
TXNL4A	-1.92448
U2AF2	-1.23319
U2SURP	-1.16973
UBA1	-1.83241
UBA2	-1.28446
UBA52	-1.39044
UBE2I	-1.57
UBE2M	-1.12945
UBE2N	-1.16611
UBL5	-2.00122
UBR4	-1.30111
UBTF	-1.66
UFD1	-1.29684
UGT1A6	-1.46933
UPF1	-1.35539
UPF2	-1.15639
UQCRH	-1.06313
URB1	-1.11443
URI1	-1.24968
USP36	-1.34208
USP39	-1.28875
USP5	-1.22576
USP7	-1.10527
UTP11	-1.23963
UTP15	-1.52304
UTP20	-1.21535
UTP25	-1.07376
UTP4	-1.48784
UTP6	-1.05247
UXT	-1.23891
VCP	-1.84838
VMP1	-1.0962
VPS25	-1.76805
VPS28	-1.16902
WARS	-1.05817
WBP11	-1.14519
WDHD1	-1.0838
WDR12	-1.15629
WDR18	-1.47833
WDR3	-1.17627
WDR33	-1.1536
WDR43	-2.02206
WDR5	-1.32231
WDR55	-1.48987
WDR61	-1.08621
WDR70	-1.23241
WDR74	-1.79059
WDR75	-1.29654
WDR77	-1.67295
WDR82	-1.47711
WEE1	-1.89317
WTAP	-1.02597
XAB2	-1.99099
XPO1	-1.34526
XRCC6	-1.49627
YARS	-2.00886
YARS2	-1.10521
YBX1	-1.06515
YJU2	-1.44045
YKT6	-1.46454
YPEL5	-1.21643
YRDC	-1.7838
YY1	-1.25686
ZBTB11	-1.50215
ZMAT2	-1.20016
ZNF131	-1.10584
ZNF207	-1.20654
ZNF407	-1.05665
ZNF574	-1.01147
ZNF830	-1.37859
ZNHIT2	-1.47742
ZNHIT3	-1.02209
ZNHIT6	-1.07982
ZPR1	-1.28293

## Sheet: p300 partners_Essential HCC1419
Gene Name	Gene Effect
ANAPC5	-1.09697
BIRC5	-1.68716
CCND1	-2.11858
CDK9	-1.27589
CHD4	-1.20344
CLTC	-1.47858
CNOT3	-1.81113
EIF2B1	-1.2831
ESR1	-1.08178
GATA3	-1.38885
GTF2B	-1.39042
GTF2E2	-1.00324
MYC	-1.53296
NEDD1	-1.59454
NUDT21	-1.63037
NUP93	-1.55987
PCNA	-1.84396
PRMT5	-1.10263
PSMC5	-1.75273
SMARCB1	-1.08891
SNIP1	-1.08984
SNW1	-1.54797
TAF1	-1.03507
TBP	-1.21585
TSG101	-1.22135
UBTF	-1.31597
XRCC6	-1.42617
YBX1	-1.47761

## Sheet: HCC1419 Essential Genes
Gene Name	Gene Effect
AARS	-1.86511
ABCE1	-1.19793
ACIN1	-1.31677
ACO2	-1.00852
ACTL6A	-1.44754
ADSL	-1.48975
AFG3L2	-1.17671
AHCY	-1.22111
AKIRIN2	-1.08058
ALG1	-1.00929
ALG11	-1.39634
ALG2	-1.43691
ANAPC1	-1.32511
ANAPC10	-1.02566
ANAPC11	-1.42969
ANAPC2	-1.29022
ANAPC4	-1.243
ANAPC5	-1.09697
ANKLE2	-1.78182
AP1G1	-1.07586
AP2M1	-1.23798
AP2S1	-1.00298
AQR	-1.67492
ARCN1	-1.40609
ARFRP1	-1.35839
ARIH1	-1.7008
ARL2	-1.15954
ARMC7	-1.38658
ATP1A1	-1.50549
ATP2A2	-1.3584
ATP5F1B	-1.45143
ATP5MF	-1.10084
ATP6AP1	-1.28001
ATP6AP2	-1.10689
ATP6V0B	-1.55581
ATP6V0C	-1.72883
ATP6V0D1	-1.21563
ATP6V1A	-1.57981
ATP6V1B2	-1.89963
ATP6V1E1	-1.56232
ATP6V1F	-1.39682
ATP6V1G1	-1.40982
ATP6V1H	-1.45347
AURKA	-1.1053
AURKB	-1.82384
BAMBI	-1.434
BANF1	-1.68445
BAP1	-1.12757
BCAS2	-1.36164
BCL2L1	-1.22925
BECN1	-1.0639
BIRC5	-1.68716
BIRC6	-1.13867
BRF1	-1.57307
BRF2	-1.65718
BUB1B	-1.13768
BUB3	-1.77399
BUD23	-1.38995
BUD31	-1.76132
BYSL	-1.07554
C1orf109	-1.12714
CACTIN	-1.28991
CAPZB	-1.72298
CARS	-1.44836
CASC3	-1.32628
CCDC115	-1.16913
CCDC130	-1.0588
CCDC84	-1.59178
CCDC86	-1.31655
CCNA2	-1.49847
CCND1	-2.11858
CCNK	-1.26136
CCT2	-1.18112
CCT3	-1.74662
CCT4	-1.48359
CCT6A	-1.14988
CCT7	-1.1785
CCT8	-1.16902
CDAN1	-1.16961
CDC123	-1.824
CDC16	-1.43075
CDC20	-1.77066
CDC23	-1.78778
CDC26	-1.05825
CDC27	-1.89074
CDC37	-1.47478
CDC45	-1.75595
CDC5L	-1.59439
CDC6	-1.4744
CDC7	-1.38726
CDCA5	-1.08882
CDCA8	-1.30003
CDIPT	-1.14581
CDK1	-1.68682
CDK4	-1.89076
CDK7	-1.37563
CDK9	-1.27589
CDT1	-1.41221
CENPE	-1.00413
CENPK	-1.2289
CENPN	-1.26076
CENPW	-1.04807
CFAP298	-1.1559
CFL1	-1.28286
CHAF1A	-1.17112
CHAF1B	-1.40339
CHD4	-1.20344
CHEK1	-1.77823
CHERP	-1.11488
CHMP2A	-1.80438
CHMP3	-1.29045
CHMP6	-1.86496
CHORDC1	-1.50102
CIAO1	-1.24147
CIAO2B	-1.06863
CIAO3	-1.69098
CIT	-1.09471
CKAP5	-1.29487
CLNS1A	-1.46357
CLP1	-1.72542
CLTC	-1.47858
CMPK1	-1.15139
CNOT1	-1.13267
CNOT3	-1.81113
COASY	-1.16007
COPA	-1.52929
COPB1	-1.71183
COPB2	-1.69388
COPG1	-1.45486
COPS5	-1.53749
COPS6	-1.70147
COPS8	-1.13584
COPZ1	-1.21444
COQ4	-1.03871
CPSF1	-1.01699
CPSF2	-1.30645
CPSF3	-1.29097
CPSF4	-1.44596
CRCP	-1.52721
CRNKL1	-1.74031
CSE1L	-1.46743
CSNK2B	-1.23331
CSTF3	-1.12622
CTCF	-1.74693
CTDP1	-1.75001
CWC22	-1.62361
CYC1	-1.11191
CYCS	-1.10862
CYHR1	-1.3785
DAD1	-1.63507
DARS	-1.3647
DBR1	-1.39623
DCTN3	-1.20308
DDB1	-1.89442
DDOST	-1.26238
DDX10	-1.09479
DDX18	-1.49592
DDX20	-1.28695
DDX27	-1.44402
DDX39B	-1.19259
DDX3X	-1.30523
DDX41	-1.35388
DDX42	-1.26318
DDX47	-1.56735
DDX49	-1.02457
DDX54	-1.32859
DDX55	-1.24483
DDX56	-1.6309
DHDDS	-1.93118
DHX15	-1.48926
DHX16	-1.18905
DHX37	-1.53224
DHX8	-1.47798
DKC1	-1.12834
DLX3	-1.13406
DMAP1	-1.39442
DNAJC11	-1.18614
DNAJC17	-1.6064
DNAJC9	-1.61982
DNM1L	-1.04315
DNM2	-1.57984
DONSON	-1.45813
DPAGT1	-1.3347
DPH3	-1.14074
DR1	-1.19907
DTL	-1.82204
DTYMK	-1.57316
DUT	-1.71012
DYNC1H1	-1.38807
DYNC1I2	-1.47846
DYNLRB1	-1.52068
EBNA1BP2	-1.16187
ECD	-1.75302
ECT2	-1.05917
EEF2	-2.13888
EFTUD2	-1.97146
EIF1	-1.21095
EIF1AD	-1.24793
EIF1AX	-1.83267
EIF2B1	-1.2831
EIF2B2	-1.79162
EIF2B3	-1.81586
EIF2B4	-1.65845
EIF2B5	-1.28143
EIF2S1	-1.66342
EIF2S2	-1.09741
EIF2S3	-1.91002
EIF3A	-1.20962
EIF3B	-1.4754
EIF3D	-1.48886
EIF3E	-1.20725
EIF3F	-1.21002
EIF3G	-1.05033
EIF3I	-1.62971
EIF3M	-1.15049
EIF4A3	-1.84478
EIF4G2	-1.02111
EIF5	-1.3167
EIF5A	-1.46996
EIF6	-1.43027
ELAC2	-1.21127
ELL	-1.1174
ELP1	-1.1488
ELP2	-1.00882
ELP3	-1.09818
ELP5	-1.27486
ELP6	-1.08536
EP400	-1.08728
EPRS	-1.52288
ERBB2	-1.42426
ERBB3	-1.39791
ERCC3	-1.055
ERH	-1.58644
ESPL1	-1.8417
ESR1	-1.08178
ESS2	-1.35323
ETF1	-1.38624
EXOSC3	-1.23881
EXOSC4	-1.19974
EXOSC6	-1.04977
EXOSC8	-1.05235
EXOSC9	-1.04721
FAM50A	-1.47037
FARSA	-1.13252
FARSB	-1.87545
FAU	-1.85767
FBL	-1.1619
FBXO5	-1.07939
FECH	-1.0012
FIP1L1	-1.35086
FNTB	-1.06232
FOXA1	-1.32796
GARS	-1.24048
GATA3	-1.38885
GBF1	-1.03771
GEMIN5	-1.42035
GGPS1	-1.14271
GGTLC2	-1.00004
GINS1	-1.58324
GINS2	-1.54141
GINS3	-1.27829
GINS4	-1.27657
GMPPB	-1.1129
GMPS	-1.52043
GNL2	-1.0464
GNL3	-1.1603
GNL3L	-1.05524
GOSR2	-1.20256
GPKOW	-1.38591
GPN1	-1.55005
GPN2	-1.46286
GPN3	-1.42261
GPS1	-1.16818
GRB2	-1.40186
GRPEL1	-1.29842
GSPT1	-1.69312
GTF2A1	-1.06065
GTF2B	-1.39042
GTF2E2	-1.00324
GTF3A	-1.31585
GTPBP4	-1.08299
GUK1	-1.35637
HARS	-1.53806
HAUS1	-1.7067
HAUS4	-1.14101
HAUS5	-1.12344
HAUS6	-1.10283
HAUS7	-1.36194
HAUS8	-1.34986
HCFC1	-1.68899
HDAC3	-1.05757
HEATR1	-1.4657
HGS	-1.12055
HINFP	-1.45618
HIRA	-1.01866
HIST1H2AM	-1.05549
HIST1H2BC	-1.47912
HIST1H2BE	-1.16678
HIST1H2BJ	-1.30169
HIST1H2BL	-1.11649
HIST1H2BN	-1.55112
HMGCR	-1.10164
HMGCS1	-1.38957
HNRNPK	-1.98588
HSPA5	-1.04723
HSPA9	-1.98873
HSPD1	-1.33143
HSPE1	-1.82264
HTATSF1	-1.23798
HYOU1	-1.2269
IARS	-1.55081
IARS2	-1.32004
IGBP1	-1.64457
IK	-1.56401
IMP3	-1.32702
IMP4	-1.01081
INCENP	-1.55445
INTS1	-1.00974
INTS11	-1.54947
INTS2	-1.16877
INTS3	-1.20611
INTS4	-1.04232
INTS5	-1.04658
INTS6	-1.57023
INTS7	-1.12557
INTS8	-1.17696
INTS9	-1.39196
IPO13	-1.36818
ISCU	-1.31617
ISY1	-1.10901
KANSL3	-1.45857
KARS	-1.52817
KAT8	-1.00873
KCMF1	-1.57348
KCTD10	-1.30038
KIF11	-1.75292
KIF14	-1.27433
KIF18A	-1.14088
KIF23	-1.50251
KIN	-1.14328
KLC2	-1.10529
KMT2D	-1.1342
KPNB1	-1.91982
KRAS	-1.01794
KRR1	-1.05095
LARS	-1.26764
LIAS	-1.22269
LONP1	-1.28374
LRR1	-2.03371
LSG1	-1.05062
LSM12	-1.00205
LSM2	-1.88356
LSM3	-1.35532
LSM4	-1.42084
LSM6	-1.16919
LSM7	-1.74599
LSM8	-1.47569
LTO1	-1.36322
LTV1	-1.19427
LUC7L3	-1.6493
LYRM4	-1.23542
MAD2L1	-1.10258
MAK16	-1.46812
MARS	-1.72215
MARS2	-1.18647
MASTL	-1.46915
MAT2A	-1.94977
MCM2	-1.72845
MCM3AP	-1.26465
MCM4	-1.10052
MCM5	-1.08436
MCM6	-1.17142
MCM7	-1.58693
MDN1	-1.48074
MED11	-1.41434
MED12	-1.06979
MED14	-1.16039
MED22	-1.14095
MED30	-1.4163
MED4	-1.09666
MED6	-1.02051
METTL16	-1.22673
MFAP1	-1.51158
MFN2	-1.00859
MIB1	-1.30195
MIEN1	-1.13372
MMS22L	-1.29238
MRGBP	-1.04334
MRPL21	-1.28316
MRPL38	-1.14649
MRPL39	-1.03377
MRPL43	-1.00588
MRPL49	-1.06171
MRPL53	-1.1086
MRPL57	-1.15907
MRPS11	-1.02089
MTOR	-1.02806
MTREX	-1.12142
MVD	-1.04612
MVK	-1.56763
MYBBP1A	-1.00971
MYC	-1.53296
NAA10	-1.31249
NAA20	-1.01671
NAA50	-1.57935
NACA	-1.08344
NAMPT	-1.16776
NAPA	-1.4726
NARS	-1.69819
NAT10	-1.22858
NCAPD2	-1.14912
NCAPG	-1.19093
NCBP2	-1.2417
NDC80	-1.44302
NDUFA6	-1.19574
NDUFAB1	-1.33577
NDUFB10	-1.20007
NDUFB9	-1.00325
NDUFC2	-1.06662
NEDD1	-1.59454
NEDD8	-1.78425
NFS1	-1.20773
NFYC	-1.09005
NIFK	-1.24493
NIP7	-1.3581
NKAP	-1.60742
NLE1	-1.24591
NMD3	-1.04887
NMT1	-1.78896
NOB1	-1.13702
NOL6	-1.22052
NOP14	-1.04963
NOP16	-1.32098
NOP2	-1.15419
NOP56	-1.32523
NOP58	-1.27183
NPLOC4	-1.48458
NRBP1	-1.25655
NRDE2	-1.28901
NRF1	-1.08447
NSA2	-1.1209
NSF	-1.66122
NSMCE3	-1.05739
NUDC	-1.20143
NUDCD3	-1.07177
NUDT21	-1.63037
NUF2	-1.21281
NUP133	-1.27773
NUP160	-1.24101
NUP205	-1.2097
NUP214	-1.03183
NUP43	-1.03278
NUP85	-1.35239
NUP88	-1.03396
NUP93	-1.55987
NUS1	-1.19119
NUTF2	-1.44317
NVL	-1.39413
NXF1	-1.17203
OGDH	-1.34951
OGT	-1.73314
ORC6	-1.46798
OSGEP	-1.60459
PABPN1	-1.19569
PAF1	-1.19274
PAFAH1B1	-1.53159
PAK1IP1	-1.10353
PAM16	-1.89536
PAXBP1	-1.00885
PCBP1	-1.6597
PCBP2	-1.02984
PCF11	-1.38916
PCID2	-1.111
PCNA	-1.84396
PDCD11	-1.0715
PDCD2	-1.16808
PDRG1	-1.33142
PES1	-1.20225
PFDN2	-1.68863
PFDN6	-1.26464
PGD	-1.2765
PHAX	-1.20243
PHB	-1.04486
PHB2	-1.5409
PHF5A	-1.83849
PIK3C3	-1.2662
PLK1	-1.87242
PMF1	-1.04981
PMPCA	-1.20011
PMPCB	-1.79211
PNPT1	-1.24199
POLA2	-1.00632
POLD1	-1.64284
POLD2	-1.2655
POLD3	-1.54721
POLE	-1.39056
POLE2	-1.12737
POLR1A	-1.11879
POLR1C	-1.28159
POLR2B	-1.5287
POLR2C	-1.8331
POLR2D	-1.39585
POLR2E	-1.49915
POLR2F	-1.62998
POLR2G	-1.58174
POLR2H	-1.17438
POLR2I	-1.55969
POLR2K	-1.1458
POLR2L	-1.66609
POLR3A	-1.92964
POLR3B	-1.5366
POLR3C	-1.25383
POLR3E	-1.22723
POLR3F	-1.32865
POLR3H	-1.55945
POLR3K	-1.62984
POP5	-1.07556
PPAN	-1.07932
PPAT	-1.0659
PPIL2	-1.29583
PPIL4	-1.0928
PPP1R11	-1.08387
PPP1R12A	-1.38092
PPP1R15B	-1.78299
PPP1R2	-1.14044
PPP1R8	-1.45124
PPWD1	-1.50686
PREB	-1.06321
PRELID1	-1.83156
PRELID3B	-1.02434
PRIM1	-1.70929
PRMT1	-1.05951
PRMT5	-1.10263
PRPF19	-2.12156
PRPF3	-1.06212
PRPF31	-1.84474
PRPF38A	-1.59329
PRPF38B	-1.34652
PRPF4	-1.25464
PRPF40A	-1.27325
PRPF8	-1.99129
PSMA1	-1.60717
PSMA2	-1.85959
PSMA3	-2.26431
PSMA4	-1.43102
PSMA5	-1.47656
PSMA6	-1.92889
PSMA7	-2.09881
PSMB1	-1.44362
PSMB2	-1.7937
PSMB3	-2.21034
PSMB4	-2.00685
PSMB5	-2.08628
PSMB6	-1.89178
PSMB7	-1.30334
PSMC1	-1.35721
PSMC2	-1.39373
PSMC3	-1.96057
PSMC4	-1.49416
PSMC5	-1.75273
PSMC6	-1.33796
PSMD1	-1.40153
PSMD11	-2.00726
PSMD13	-1.10765
PSMD14	-1.60801
PSMD2	-1.42468
PSMD3	-1.86107
PSMD4	-1.29307
PSMD6	-1.57862
PSMD7	-1.56774
PSMG1	-1.13207
PSMG3	-1.75723
PSMG4	-1.72587
PTPN23	-1.63142
PUF60	-1.91333
PWP2	-1.09238
QARS	-1.60155
RAB10	-1.14766
RABGGTA	-1.66144
RABGGTB	-1.55175
RACGAP1	-1.18115
RACK1	-1.54315
RAD51	-1.0755
RAE1	-1.26149
RAN	-2.20824
RANGAP1	-1.32222
RBBP6	-1.24874
RBM14	-1.15417
RBM17	-1.1567
RBM22	-1.56412
RBM25	-1.33044
RBM39	-1.58878
RBM8A	-1.31629
RCC1	-1.57808
RFC2	-1.29442
RFC3	-1.1656
RFC5	-1.08473
RHOB	-1.49384
RIOK2	-1.11562
RNF113A	-1.37575
RNF20	-1.24763
RNGTT	-1.36845
RNPC3	-1.62349
ROMO1	-1.5135
RPA1	-1.63872
RPA2	-1.44693
RPA3	-1.52075
RPAIN	-1.66988
RPAP1	-1.62777
RPAP2	-1.08249
RPL10A	-1.50941
RPL11	-1.76358
RPL12	-1.52378
RPL13	-1.4425
RPL14	-1.42743
RPL15	-1.45512
RPL17	-1.99081
RPL18	-1.68973
RPL18A	-1.64855
RPL19	-1.84972
RPL23	-1.90982
RPL23A	-1.27001
RPL24	-1.32118
RPL26	-1.41576
RPL27	-1.68972
RPL27A	-1.32125
RPL3	-1.70839
RPL31	-1.67781
RPL32	-1.22298
RPL34	-1.26011
RPL35	-1.21549
RPL36	-1.30244
RPL37	-1.31743
RPL38	-1.17645
RPL4	-1.606
RPL5	-1.6198
RPL6	-1.01785
RPL7	-1.4163
RPL7A	-1.47773
RPL8	-1.16943
RPLP0	-1.53137
RPLP1	-1.28401
RPLP2	-1.37034
RPN2	-1.03169
RPS11	-1.76197
RPS12	-1.36179
RPS13	-1.56373
RPS14	-1.77705
RPS15	-1.20363
RPS15A	-1.5997
RPS16	-1.54607
RPS18	-1.6242
RPS19	-1.63512
RPS20	-1.69831
RPS23	-1.43001
RPS24	-1.36374
RPS25	-1.14115
RPS27A	-1.24879
RPS28	-1.60665
RPS29	-1.6969
RPS3	-1.89508
RPS4X	-1.68618
RPS6	-1.71069
RPS7	-1.06798
RPS8	-1.57686
RPS9	-1.55071
RRM1	-1.6555
RRM2	-1.51029
RRS1	-1.07086
RSL24D1	-1.28978
RUVBL1	-1.88196
RUVBL2	-1.96607
SACM1L	-1.45941
SAE1	-1.47085
SAP18	-1.18324
SAP30BP	-1.43216
SARS	-1.97632
SART3	-1.67019
SBDS	-1.92129
SBNO1	-1.56783
SDAD1	-1.06649
SDE2	-1.71518
SDHB	-1.28912
SDHC	-1.07074
SDHD	-1.15192
SEC13	-1.34816
SEC61A1	-1.83553
SEC61G	-1.12179
SEH1L	-1.32492
SEM1	-1.32032
SF1	-2.03715
SF3A1	-1.74885
SF3A2	-1.36014
SF3A3	-1.77158
SF3B1	-1.37447
SF3B2	-1.42383
SF3B3	-1.81461
SF3B4	-1.68614
SF3B5	-2.05632
SF3B6	-1.59821
SFPQ	-1.6167
SGF29	-1.11775
SKP1	-1.00021
SLC2A4RG	-1.23223
SLC39A7	-1.34711
SLC7A6OS	-1.20048
SLU7	-1.32586
SMARCB1	-1.08891
SMARCE1	-1.1192
SMC1A	-1.40669
SMC3	-1.16283
SMC4	-1.34082
SMG1	-1.35212
SMG5	-1.43122
SMG6	-1.17906
SMU1	-2.34641
SNAPC1	-1.33058
SNAPC4	-1.18121
SNAPC5	-1.09403
SNIP1	-1.08984
SNRNP200	-2.06705
SNRNP25	-1.28258
SNRNP27	-1.50487
SNRNP35	-1.23669
SNRNP40	-1.21661
SNRNP70	-1.35711
SNRPA1	-1.81949
SNRPB	-1.93725
SNRPD1	-1.99838
SNRPD2	-1.83903
SNRPD3	-1.97782
SNRPE	-2.25239
SNRPF	-2.18014
SNRPG	-1.53616
SNU13	-1.81193
SNUPN	-1.15127
SNW1	-1.54797
SOD1	-1.13667
SOD2	-1.4415
SON	-1.33224
SPATA5L1	-1.14018
SPC24	-1.83171
SPC25	-1.67881
SPCS2	-1.19166
SPCS3	-1.4186
SPDEF	-1.20706
SPOUT1	-1.60441
SRBD1	-1.23398
SRP14	-1.53961
SRP19	-1.24621
SRP54	-1.36699
SRP72	-1.23913
SRP9	-1.34917
SRPRA	-1.09705
SRRM1	-1.07092
SRSF1	-1.61246
SRSF11	-1.38332
SRSF2	-2.05071
SRSF3	-1.57169
SRSF7	-1.7604
SSRP1	-1.41695
SSU72	-1.49495
STX4	-1.17842
STX5	-1.29373
SUPT16H	-1.47056
SUPT5H	-1.34271
SUPT6H	-1.41169
SUPV3L1	-1.08075
SYF2	-1.132
SYMPK	-1.22173
TAF1	-1.03507
TAF1C	-1.03596
TAF6	-1.04508
TANGO6	-1.44227
TARS	-1.1818
TBCB	-1.27935
TBL3	-1.06894
TBP	-1.21585
TBX3	-1.2107
TCP1	-1.25979
TELO2	-1.0368
TFAP2C	-1.78464
TFIP11	-1.22821
TFRC	-1.46099
THAP1	-1.40445
THOC1	-1.29701
THOC2	-1.52682
THOC3	-1.2583
THOC5	-1.18207
TICRR	-1.49827
TIMELESS	-1.34742
TIMM10	-1.11689
TIMM13	-1.30523
TIMM23	-1.01154
TIMM44	-1.1283
TINF2	-1.28042
TMEM258	-1.2651
TNPO3	-1.40145
TOMM22	-1.1084
TONSL	-1.58927
TOP2A	-1.96619
TOPBP1	-1.30345
TPX2	-1.0028
TRAPPC1	-1.4399
TRAPPC3	-1.55868
TRAPPC4	-1.35989
TRAPPC8	-1.50647
TRMT112	-1.20799
TRNT1	-1.3467
TRPM7	-1.25258
TRPS1	-1.01314
TRRAP	-1.35842
TSG101	-1.22135
TSR1	-1.27374
TSR2	-1.45243
TTC1	-1.56853
TTC27	-1.53915
TTI1	-1.13694
TUBA1B	-1.01571
TUBG1	-1.50091
TUBGCP4	-1.05847
TUT1	-1.98142
TWISTNB	-1.19918
TXNL4A	-2.1784
TXNL4B	-1.16898
U2AF2	-1.64026
U2SURP	-1.01801
UBA1	-1.81832
UBA2	-1.05038
UBA52	-1.20685
UBAP1	-1.295
UBE2I	-1.33149
UBE2M	-1.06543
UBL5	-2.0846
UBR4	-1.70915
UBTF	-1.31597
UFD1	-1.36812
UGT1A6	-1.44632
UPF1	-1.20871
UQCRFS1	-1.16175
URB1	-1.07697
URI1	-1.16682
URM1	-1.02984
UROD	-1.37191
USP36	-1.09354
USP39	-1.07668
USP5	-1.31158
UTP15	-1.09211
UTP20	-1.25858
UTP4	-1.26296
UXT	-1.19294
VARS	-1.56877
VCP	-2.13191
VMP1	-1.09183
VPS13D	-1.03261
VPS18	-1.32966
VPS25	-2.04572
VPS28	-1.45837
VPS37A	-1.04264
WAC	-1.02942
WARS	-1.43242
WBP11	-1.17777
WDHD1	-1.14137
WDR12	-1.27712
WDR18	-1.1895
WDR33	-1.10312
WDR43	-1.54355
WDR55	-1.23893
WDR61	-1.08562
WDR7	-1.05529
WDR70	-1.13583
WDR74	-1.54725
WDR75	-1.1265
WDR77	-1.17449
WEE1	-1.86625
WNK1	-1.22885
XAB2	-2.10251
XPO1	-1.48471
XRCC5	-1.06732
XRCC6	-1.42617
XRN2	-1.03715
YARS	-1.96039
YARS2	-1.09951
YBX1	-1.47761
YJU2	-1.70517
YKT6	-1.52376
YRDC	-2.52848
ZBTB11	-1.1547
ZBTB8OS	-1.11297
ZFX	-1.22287
ZGPAT	-1.38229
ZMAT2	-1.56194
ZNF131	-1.25749
ZNF207	-1.60065
ZNF407	-1.25806
ZNF830	-1.50008
ZNHIT2	-1.82206
ZPR1	-1.68269
ZRSR2	-1.18302
ZZZ3	-1.14311

## Sheet: p300 binding_DE_LumA
Gene	Ensemble	log2FC	FC	pvalue	qvalue
GATA3	2625	2.57981	5.9786	4.08983e-81	5.45249e-79
EBF1	1879	-2.74183	-6.68919	3.63888e-75	3.22025e-73
PPARA	5465	-1.85001	-3.60504	1.73749e-74	1.41557e-72
FOXO1	2308	-1.78963	-3.45726	2.66772e-70	1.64973e-68
NR3C2	4306	-2.44989	-5.46375	3.76103e-70	2.28455e-68
MAML2	84441	-2.67526	-6.38755	2.24523e-68	1.20357e-66
HLF	3131	-3.44813	-10.9141	4.01439e-67	1.96705e-65
STAT5B	6777	-1.08259	-2.11783	1.10804e-66	5.29051e-65
PPARG	5468	-3.00045	-8.0025	1.07364e-64	4.36494e-63
PPARGC1A	10891	-2.59949	-6.06072	1.63045e-62	5.68331e-61
FOXM1	2305	2.18526	4.54808	4.17943e-62	1.41364e-60
NR3C1	2908	-1.71697	-3.28746	7.8896e-61	2.46496e-59
PROX1	5629	-2.91424	-7.53832	1.3375e-58	3.61795e-57
PARP1	142	0.970304	1.95925	6.10486e-58	1.58858e-56
TAL1	6886	-1.71348	-3.2795	2.17552e-57	5.46035e-56
GTF3C1	2975	0.85479	1.8085	4.01583e-57	9.88597e-56
ESR1	2099	2.23336	4.70229	4.8198e-57	1.18085e-55
ETS2	2114	-1.39924	-2.63762	6.16576e-57	1.4981e-55
RECQL4	9401	2.07199	4.20466	7.65885e-57	1.84993e-55
KLF4	9314	-2.27589	-4.84296	3.48011e-53	6.80477e-52
IRF7	3665	1.74725	3.35719	3.66072e-53	7.13753e-52
RARA	5914	1.16994	2.25002	8.51093e-53	1.61645e-51
BIRC5	332	2.4262	5.37477	1.59708e-52	2.99176e-51
KAT2B	8850	-1.42337	-2.68212	7.4704e-50	1.21341e-48
EGR1	1958	-2.68112	-6.41355	2.24465e-49	3.53412e-48
KLF6	1316	-1.46265	-2.75614	2.56244e-49	4.02213e-48
STAT5A	6776	-1.28883	-2.4433	3.6398e-49	5.6527e-48
MED25	81857	0.988104	1.98358	7.00136e-49	1.06794e-47
BCL6	604	-1.19384	-2.28761	2.55782e-46	3.44132e-45
HOXA9	3205	-2.42314	-5.36337	4.21947e-46	5.59987e-45
SGK1	6446	-1.60679	-3.04574	1.20545e-45	1.5664e-44
RPS6KA3	6197	-1.47067	-2.7715	4.69569e-44	5.68104e-43
MEF2C	4208	-1.17107	-2.25178	8.51981e-43	9.73944e-42
THRB	7068	-1.40204	-2.64276	2.27671e-42	2.5487e-41
MAF	4094	-1.17175	-2.25285	9.64968e-42	1.05663e-40
FEN1	2237	0.82013	1.76557	1.73602e-41	1.87591e-40
PCNA	5111	0.710414	1.63627	3.92528e-41	4.16485e-40
SMARCA4	6597	0.731304	1.66014	1.46419e-40	1.51748e-39
MYBL2	4605	2.07101	4.20182	1.71563e-39	1.68372e-38
DUSP1	1843	-1.91863	-3.78064	1.69005e-38	1.58223e-37
HES6	55502	1.92275	3.79146	6.56563e-38	5.98308e-37
HIST2H2BE	8349	1.81111	3.50913	8.4386e-38	7.65817e-37
FOXO4	4303	-0.905293	-1.87292	3.53065e-37	3.1084e-36
E2F1	1869	1.43542	2.70461	4.4669e-37	3.9092e-36
SATB1	6304	-1.67604	-3.19549	1.06944e-36	9.17534e-36
MYC	4609	-1.59102	-3.01262	1.75231e-36	1.48602e-35
MYB	4602	2.20291	4.60407	1.76963e-36	1.49886e-35
DCP1A	55802	-0.625381	-1.54262	3.44534e-35	2.72587e-34
HOXA10	3206	-1.76575	-3.40051	1.12312e-34	8.63626e-34
YBX1	4904	-0.66827	-1.58917	1.1619e-34	8.92443e-34
FOS	2353	-2.38336	-5.2175	3.80134e-34	2.84837e-33
ZBTB7B	51043	0.8451	1.79639	1.09339e-33	8.01158e-33
UBTF	7343	0.436717	1.35352	4.4988e-33	3.20822e-32
KLF13	51621	-0.913254	-1.88329	1.16329e-32	8.1347e-32
CHD9	80205	-1.06258	-2.08866	1.25543e-32	8.76706e-32
GAK	2580	0.69056	1.61391	3.06807e-32	2.10179e-31
FUS	2521	0.7555	1.68822	3.3319e-32	2.27872e-31
ROCK2	9475	-1.39598	-2.63167	1.39553e-31	9.30852e-31
SREBF1	6720	1.34523	2.5407	2.11514e-31	1.39768e-30
CHD4	1108	0.41257	1.33105	3.55718e-31	2.32587e-30
CEBPA	1050	-1.51672	-2.86139	5.47366e-31	3.54846e-30
NOTCH1	4851	-0.816674	-1.76134	9.4557e-31	6.07431e-30
FGFR1	2260	-1.23404	-2.35225	1.92682e-30	1.21909e-29
JUN	3725	-1.36815	-2.58139	3.71421e-30	2.31431e-29
CARM1	10498	0.490452	1.40488	7.63334e-30	4.69362e-29
NFE2L2	4780	-0.614604	-1.53114	9.97049e-30	6.09965e-29
MECOM	2122	-1.19288	-2.28609	1.68301e-29	1.01839e-28
POLB	5423	0.85999	1.81503	1.78236e-29	1.07755e-28
SMAD4	4089	-0.527407	-1.44134	3.58952e-29	2.13366e-28
ANAPC7	51434	0.34907	1.27374	6.27448e-29	3.68904e-28
ZNF521	25925	-1.39206	-2.62454	1.8635e-28	1.07229e-27
SRF	6722	-0.642556	-1.56109	2.4495e-28	1.40124e-27
AKT1	207	0.569173	1.48367	4.56334e-28	2.57815e-27
NR4A1	3164	-2.01371	-4.03818	6.73055e-28	3.76218e-27
HAND2	9464	-1.33792	-2.52787	1.23091e-27	6.81364e-27
DAXX	1616	0.51722	1.43119	1.24952e-27	6.91477e-27
MAFG	4097	-0.616009	-1.53263	2.60983e-27	1.42393e-26
MAPK14	1432	-0.428901	-1.34621	4.98098e-27	2.68341e-26
CEBPB	1051	-0.907772	-1.87615	6.87751e-27	3.68482e-26
ELK1	2002	0.381761	1.30293	7.48954e-27	4.00541e-26
TRERF1	55809	1.02595	2.0363	9.43696e-27	5.02464e-26
TP63	8626	-2.69871	-6.49221	1.04141e-26	5.53485e-26
TARBP2	6895	0.642754	1.56131	4.26786e-26	2.20785e-25
KLF5	688	-1.89738	-3.72537	5.7971e-26	2.98371e-25
ETV1	2115	-1.30996	-2.47934	8.15548e-26	4.17661e-25
PLAG1	5324	-1.16622	-2.24422	1.36261e-25	6.92299e-25
PAX3	5077	-1.66565	-3.17256	1.43323e-25	7.2746e-25
ETS1	2113	-0.987943	-1.98336	1.03761e-23	4.85154e-23
ALX1	8092	-1.13773	-2.20035	1.41263e-23	6.56764e-23
TCF3	6929	0.666037	1.58671	1.86358e-23	8.6174e-23
HBP1	26959	-0.407266	-1.32617	3.14376e-23	1.43816e-22
SIRT2	22933	-0.441893	-1.35839	3.17504e-23	1.45182e-22
CNOT3	4849	0.473449	1.38843	4.7133e-23	2.1357e-22
CCND1	595	1.01602	2.02233	1.17792e-22	5.25392e-22
KLF2	10365	-1.14248	-2.2076	1.52559e-22	6.771e-22
PAX6	5080	-0.592901	-1.50828	2.91276e-22	1.27864e-21
RPS6KA1	6195	0.833809	1.78239	4.17028e-22	1.81938e-21
HOXD4	3233	-1.35738	-2.56219	4.45831e-22	1.94256e-21
PTEN	5728	-0.595536	-1.51103	4.49161e-22	1.95624e-21
TRIP10	9322	-0.621949	-1.53895	5.26011e-22	2.28465e-21
GABPA	2551	-0.50473	-1.41886	6.93024e-22	2.98918e-21
NCOA1	8648	-0.514065	-1.42807	1.41372e-21	6.01556e-21
TFAP2A	7020	1.56011	2.94875	7.79719e-21	3.20617e-20
HERC1	8925	-0.684001	-1.60659	1.38396e-20	5.621e-20
RORA	6095	-0.749305	-1.68098	1.62266e-20	6.5697e-20
RUNX2	860	1.21161	2.31595	2.64012e-20	1.05785e-19
TSG101	7251	0.298763	1.23009	4.14199e-20	1.64327e-19
NUDT21	11051	-0.460882	-1.37638	5.51965e-20	2.17345e-19
JMY	133746	-0.616286	-1.53292	5.59935e-20	2.20399e-19
PIAS3	10401	0.557296	1.47151	1.38689e-19	5.35734e-19
WT1	7490	2.35455	5.11436	1.39106e-19	5.37141e-19
SRCAP	10847	0.409943	1.32863	2.48567e-19	9.48672e-19
TGFB1I1	7041	-0.800165	-1.7413	2.9635e-18	1.07478e-17
E2F5	1875	0.816038	1.76056	3.57925e-18	1.29217e-17
ATF5	22809	0.534437	1.44838	5.16733e-18	1.85279e-17
CRTC2	200186	0.38352	1.30452	5.51361e-18	1.97591e-17
EID3	493861	-0.759217	-1.69257	7.20066e-18	2.56261e-17
ATF4	468	-0.460513	-1.37603	1.80115e-17	6.26769e-17
SMAD2	4087	-0.362788	-1.28591	2.30416e-17	7.97214e-17
CITED1	4435	-2.04321	-4.12162	5.40311e-17	1.83966e-16
ERAL1	26284	0.349249	1.2739	9.5339e-17	3.20518e-16
GATA6	2627	-1.02769	-2.03875	1.48656e-16	4.95303e-16
KLF1	10661	0.688408	1.6115	3.18716e-16	1.04513e-15
FOXO3	2309	-0.548204	-1.46226	9.62725e-16	3.07925e-15
MEF2D	4209	0.368544	1.29105	3.22862e-15	1.00526e-14
RBCK1	10616	0.436378	1.3532	3.32569e-15	1.03485e-14
WRN	7486	-0.600574	-1.51632	3.67059e-15	1.1389e-14
MAPK1	5594	-0.370058	-1.2924	3.92387e-15	1.21565e-14
MSX1	4487	-0.837043	-1.78639	4.02068e-15	1.2447e-14
HDAC1	3065	0.414372	1.33272	4.20849e-15	1.30206e-14
GTF2F1	2962	0.360277	1.28367	4.45909e-15	1.37814e-14
ZFPM2	23414	-1.07676	-2.10929	5.37165e-15	1.65494e-14
PML	5371	-0.377482	-1.29907	8.09594e-15	2.47384e-14
BTRC	8945	0.548882	1.46295	1.94957e-14	5.84927e-14
STAT4	6775	-1.18034	-2.26631	3.54857e-14	1.0507e-13
EIF2B1	1967	-0.206193	-1.15364	1.5304e-13	4.4025e-13
AHR	196	-0.752996	-1.68529	1.54012e-13	4.42984e-13
CENPJ	55835	-0.474215	-1.38916	1.69925e-13	4.87458e-13
HOXB9	3219	1.01704	2.02376	2.36887e-13	6.74554e-13
ATN1	1822	-0.294787	-1.2267	2.75951e-13	7.82935e-13
SKP2	6502	-0.533212	-1.44715	2.77576e-13	7.8736e-13
HOXD10	3236	-0.901233	-1.86766	2.96951e-13	8.41157e-13
TTF1	7270	-0.261757	-1.19894	3.19235e-13	9.03156e-13
NFKB2	4791	0.46373	1.3791	4.22444e-13	1.18811e-12
ELF3	1999	1.2908	2.44663	8.92642e-13	2.4676e-12
GAPDH	2597	0.473214	1.3882	9.0187e-13	2.4921e-12
CTBP2	1488	0.472247	1.38727	1.20919e-12	3.31896e-12
SIRT1	23411	-0.396782	-1.31657	1.3519e-12	3.70029e-12
NFATC4	4776	0.71356	1.63985	1.59879e-12	4.36034e-12
SMAD3	4088	-0.453666	-1.36952	2.21352e-12	5.99391e-12
MTF1	4520	-0.384464	-1.30537	2.46467e-12	6.65906e-12
DDX24	57062	-0.231349	-1.17393	3.33737e-12	8.965e-12
SOX4	6659	0.613946	1.53044	3.41269e-12	9.15657e-12
STAT6	6778	-0.304337	-1.23485	3.58019e-12	9.59094e-12
HIST4H4	121504	0.952164	1.93477	5.00163e-12	1.3281e-11
CTBP1	1487	0.311076	1.24063	5.27258e-12	1.39896e-11
GMEB2	26205	0.311063	1.24062	7.54633e-12	1.98506e-11
DDX17	10521	-0.345884	-1.27093	8.64955e-12	2.26915e-11
ZEB1	6935	-0.773444	-1.70935	1.25657e-11	3.26523e-11
NFATC2	4773	-1.1331	-2.19329	1.3417e-11	3.48028e-11
CREB1	1385	-0.308547	-1.23846	2.11452e-11	5.42124e-11
HOXB2	3212	1.07226	2.10272	2.1475e-11	5.50373e-11
HIST3H2A	92815	1.36049	2.56772	7.18124e-11	1.78951e-10
PIAS1	8554	-0.415676	-1.33392	8.68607e-11	2.15561e-10
NFATC1	4772	-0.441605	-1.35811	3.04791e-10	7.35676e-10
RUNX1	861	0.572461	1.48706	3.32499e-10	8.00297e-10
ING2	3622	0.318538	1.24707	3.69461e-10	8.85937e-10
EYA1	2138	-1.25163	-2.3811	4.74243e-10	1.13059e-09
CLTC	1213	0.377247	1.29886	5.8577e-10	1.38825e-09
RPS6KA5	9252	-0.570835	-1.48538	6.36273e-10	1.50395e-09
SMARCB1	6598	0.295756	1.22753	7.22485e-10	1.70205e-09
DDX5	1655	-0.265058	-1.20168	9.25747e-10	2.16623e-09
CITED2	10370	-0.532176	-1.44611	1.4331e-09	3.31938e-09
ZBTB17	7709	0.369019	1.29147	2.35801e-09	5.38692e-09
IRF1	3659	0.470703	1.38578	2.58834e-09	5.89672e-09
RUNX3	864	-0.725442	-1.65341	2.74063e-09	6.23536e-09
BRCA1	672	0.457035	1.37272	5.496e-09	1.22958e-08
TAF1	6872	-0.350467	-1.27497	8.40235e-09	1.85653e-08
SP1	6667	-0.237072	-1.1786	9.61062e-09	2.11621e-08
HIPK2	28996	-0.718465	-1.64543	1.08812e-08	2.38857e-08
HBZ	3050	-0.322089	-1.25014	1.22173e-08	2.67443e-08
IKBKG	8517	0.326012	1.25354	1.28716e-08	2.81555e-08
HOXB1	3211	0.440495	1.35707	1.46388e-08	3.19257e-08
CHD2	1106	-0.281998	-1.21588	1.78388e-08	3.87154e-08
VDR	7421	0.583982	1.49898	1.80385e-08	3.91364e-08
PELP1	27043	0.317221	1.24593	2.99335e-08	6.40638e-08
STAT1	6772	0.507941	1.42202	3.88723e-08	8.26776e-08
ASCL1	429	1.69936	3.24757	5.00951e-08	1.05922e-07
DACH1	1602	0.833961	1.78257	5.56486e-08	1.17326e-07
CDK5RAP3	80279	0.369502	1.29191	5.56733e-08	1.17354e-07
SPI1	6688	0.538006	1.45196	7.16181e-08	1.50009e-07
TLX1	3195	0.953607	1.93671	8.45164e-08	1.76217e-07
CTNNB1	1499	-0.274938	-1.20994	8.59141e-08	1.78986e-07
HSF1	3297	0.319433	1.24784	9.2647e-08	1.92641e-07
DHX9	1660	0.182922	1.13518	1.05013e-07	2.17692e-07
CEBPD	1052	-0.6566	-1.57636	1.86219e-07	3.80387e-07
TP53BP1	7158	0.289864	1.22252	2.06845e-07	4.21345e-07
TBP	6908	-0.180824	-1.13353	3.22043e-07	6.48986e-07
GTF2B	2959	-0.182401	-1.13477	3.3565e-07	6.75677e-07
APEX1	328	0.198741	1.1477	3.63476e-07	7.3026e-07
NPAT	4863	-0.348541	-1.27327	5.5513e-07	1.10162e-06
CDK8	1024	-0.340128	-1.26587	8.16336e-07	1.60293e-06
SNIP1	79753	-0.181591	-1.13413	8.95086e-07	1.75387e-06
EID1	23741	-0.216065	-1.16156	1.79323e-06	3.44758e-06
IRF3	3661	0.376499	1.29819	1.87962e-06	3.60658e-06
ATG7	10533	0.160094	1.11736	2.05132e-06	3.9254e-06
ARNT	405	-0.221506	-1.16595	2.18423e-06	4.17467e-06
POU2F3	25833	0.597096	1.51267	3.38405e-06	6.38525e-06
PSMC5	5705	0.231977	1.17444	4.77179e-06	8.90551e-06
MYBL1	4603	0.603516	1.51942	6.18427e-06	1.14407e-05
ATF2	1386	-0.36511	-1.28798	8.21395e-06	1.50787e-05
CDK9	1025	0.186619	1.13809	1.6935e-05	3.04352e-05
NCOR1	9611	-0.294816	-1.22673	2.39792e-05	4.2647e-05
ATR	545	-0.230556	-1.17329	2.41068e-05	4.28665e-05
HOXA11	3207	0.58867	1.50386	2.42418e-05	4.31028e-05
ING5	84289	-0.250676	-1.18976	2.65296e-05	4.70402e-05
HOXB6	3216	0.834483	1.78322	2.78455e-05	4.92884e-05
PRMT5	10419	0.159571	1.11696	3.37345e-05	5.93439e-05
TBX21	30009	-0.618523	-1.5353	5.38666e-05	9.3383e-05
HNF1A	6927	0.379807	1.30117	5.73419e-05	9.9165e-05
GATA4	2626	0.855403	1.80926	8.37776e-05	0.000143217
YY1	7528	0.131136	1.09516	9.29304e-05	0.00015831
ING1	3621	0.258209	1.19599	0.000101186	0.00017196
MAP3K1	4214	0.39874	1.31836	0.000105055	0.000178359
GATA5	140628	0.819615	1.76494	0.000115154	0.000194971
FBXO3	26273	-0.163646	-1.12011	0.000136784	0.000230303
NUP98	4928	-0.147632	-1.10775	0.000181077	0.000301859
AP1B1	162	0.182764	1.13506	0.000201778	0.000335279
SUB1	10923	0.308329	1.23827	0.000249836	0.000411932
MIER1	57708	-0.196711	-1.14608	0.000292262	0.000479306
GMEB1	10691	-0.161846	-1.11872	0.000327919	0.000535346
HIF1A	3091	-0.359398	-1.28289	0.000402181	0.000652071
HIST3H3	8290	0.134464	1.09768	0.000739655	0.00117405
NFYA	4800	0.162509	1.11923	0.000742662	0.0011786
TCF12	6938	-0.191541	-1.14198	0.000807097	0.00127652
MDM2	4193	0.191305	1.1418	0.0008915	0.00140428
SPIB	6689	0.653799	1.57331	0.000944275	0.00148445
RB1	5925	-0.182239	-1.13464	0.00121767	0.0018925
RBBP4	5928	0.166446	1.12229	0.00126696	0.00196658
XAF1	54739	-0.346561	-1.27153	0.00139509	0.00215763
ATF1	466	-0.138888	-1.10106	0.00148241	0.00228837
SS18	6760	0.116561	1.08415	0.0015652	0.00241091
KAT2A	2648	0.231832	1.17433	0.00159033	0.00244797
DBP	1628	0.282043	1.21592	0.00170535	0.00261795
KHDRBS1	10657	0.0785192	1.05593	0.00220206	0.0033457
EWSR1	2130	0.114531	1.08262	0.00225597	0.00342331
CD44	960	0.268581	1.20462	0.0025788	0.00389504
NR2F2	7026	0.276289	1.21108	0.00393522	0.00584067
TDG	6996	0.126345	1.09152	0.00407329	0.00603687
HDAC6	10013	-0.0988651	-1.07093	0.00460696	0.0067964
ZBTB2	57621	0.134221	1.0975	0.00478752	0.00705264
JUNB	3726	-0.342795	-1.26821	0.00581847	0.00849276
PLAGL2	5326	0.128962	1.09351	0.00775115	0.0111778
NBN	4683	0.156199	1.11435	0.00792723	0.0114189
CUX1	1523	0.157896	1.11566	0.00914571	0.0130978
IRF2	3660	-0.0935591	-1.067	0.00919136	0.0131586
FOXA2	3170	-0.179706	-1.13265	0.00931408	0.0133269
NCOA2	10499	-0.395442	-1.31535	0.00975672	0.0139282
OGG1	4968	0.0961272	1.0689	0.0110085	0.0156336
HOXB3	3213	0.397293	1.31703	0.0126607	0.0178859
NRIP1	8204	0.217683	1.16286	0.0146482	0.0205565
SOX9	6662	-0.359159	-1.28268	0.0150386	0.0210741
VRK2	7444	0.197039	1.14634	0.015096	0.0211503
GATA1	2623	0.236036	1.17775	0.0187335	0.0260122
MSH6	2956	0.0932561	1.06678	0.020043	0.027733
EID2	163126	0.093977	1.06731	0.0222081	0.0306133
GLI3	2737	0.20443	1.15223	0.0271761	0.0370757
TP73	7161	0.335547	1.26186	0.0276692	0.0377234
XRCC6	2547	-0.0816806	-1.05825	0.0281417	0.0383395
CHUK	1147	-0.0968554	-1.06944	0.028696	0.0390351
AR	367	0.345781	1.27084	0.032254	0.0436496
ING4	51147	-0.0915955	-1.06555	0.0427361	0.0570491
CDX2	1045	-0.113512	-1.08186	0.0432094	0.0576397
TAF15	8148	0.106513	1.07662	0.0442461	0.0588887
RAD23A	5886	0.0953681	1.06834	0.049303	0.0652343
PCMT1	5110	0.0825767	1.05891	0.0521751	0.0688525
NEUROD1	4760	0.101676	1.07302	0.0565037	0.074264
MDC1	9656	-0.0845963	-1.06039	0.0573375	0.0752924
MAGEA11	4110	0.173953	1.12815	0.0690275	0.0896645
RAD50	10111	0.10043	1.07209	0.0706092	0.091572
GATA2	2624	0.250161	1.18934	0.0829202	0.106595
GPS2	2874	0.0929095	1.06652	0.0863177	0.110713
TAX1BP3	30851	0.102961	1.07398	0.0948871	0.120897
SMAD7	4092	-0.0819979	-1.05848	0.097383	0.123804
AIRE	326	0.0687567	1.04881	0.0982102	0.124774
POLR2A	5430	0.0826114	1.05893	0.104497	0.132255
EYA3	2140	-0.168672	-1.12402	0.108401	0.136884
SERTAD1	29950	-0.118575	-1.08566	0.111269	0.140315
MSH2	4436	0.0680821	1.04832	0.120443	0.151177
GTF2E2	2961	-0.0861585	-1.06154	0.132969	0.165937
CREM	1390	-0.0697857	-1.04956	0.13438	0.167505
FOXL1	2300	-0.141115	-1.10276	0.139549	0.173473
TP53	7157	0.0887831	1.06347	0.151337	0.187085
PHOX2B	8929	-0.0359678	-1.02524	0.152064	0.187916
NCOA3	8202	-0.0907602	-1.06493	0.155976	0.192367
SOX2	6657	0.310235	1.23991	0.156023	0.192414
ETV4	2118	-0.254951	-1.19329	0.205178	0.247955
POU3F2	5454	0.0906878	1.06488	0.207165	0.250106
CRX	1406	-0.0394354	-1.02771	0.217235	0.261295
NFKB1	4790	-0.0567634	-1.04013	0.217671	0.26179
SMAD1	4086	-0.0554334	-1.03917	0.220462	0.264897
PAX5	5079	0.243046	1.18349	0.221683	0.266241
TAZ	6901	0.0705915	1.05015	0.235167	0.28138
ZNF148	7707	-0.0636469	-1.0451	0.240511	0.287373
FHL2	2274	-0.150424	-1.1099	0.241975	0.28892
SNW1	22938	0.0330684	1.02319	0.277184	0.32723
CITED4	163732	0.188463	1.13955	0.280585	0.330922
REG3A	5068	0.0397809	1.02796	0.292382	0.34371
NR5A1	2516	-0.138089	-1.10045	0.300712	0.352674
RELA	5970	0.0336977	1.02363	0.305545	0.357913
PDX1	3651	0.0431374	1.03035	0.315475	0.368515
NUP93	9688	-0.0420358	-1.02957	0.318754	0.372007
STAT3	6774	0.0450858	1.03174	0.320151	0.37353
HOXB4	3214	-0.152688	-1.11164	0.331214	0.385213
HNF4A	3172	0.0608124	1.04305	0.342782	0.397451
VHL	7428	0.0566055	1.04002	0.351298	0.406316
NEUROG1	4762	0.0117829	1.0082	0.357241	0.412306
VRK1	7443	-0.035974	-1.02525	0.36173	0.416761
STAT2	6773	-0.0379019	-1.02662	0.380849	0.436365
PRKAA2	5563	-0.165348	-1.12144	0.392198	0.447967
PAX8	7849	0.143264	1.1044	0.423239	0.479779
HOXD13	3239	-0.0959688	-1.06878	0.431246	0.488034
TTC5	91875	-0.0285407	-1.01998	0.514162	0.570502
EMB	133418	0.0760365	1.05412	0.52506	0.581039
SS18L1	26039	0.0340792	1.0239	0.538768	0.594446
ONECUT1	3175	0.0191571	1.01337	0.612205	0.666093
SREBF2	6721	0.0310557	1.02176	0.629467	0.682849
CIITA	4261	-0.0526054	-1.03714	0.642583	0.694691
HOXD12	3238	0.0073109	1.00508	0.643107	0.695213
HOXB7	3217	-0.0533501	-1.03767	0.645172	0.696793
OLIG2	10215	0.0186535	1.01301	0.648081	0.699751
MN1	4330	-0.0578725	-1.04093	0.651634	0.702885
ANAPC5	51433	0.0116139	1.00808	0.698816	0.748195
NEDD1	121441	-0.0213366	-1.0149	0.705114	0.754387
HNF1B	6928	-0.0281896	-1.01973	0.728	0.775679
CDC25B	994	0.0260641	1.01823	0.731334	0.778666
TNP2	7142	-0.00358836	-1.00249	0.756386	0.801846
SP3	6670	-0.00710785	-1.00494	0.889891	0.921209
POU1F1	5449	0.00266683	1.00185	0.939616	0.964322
HTT	3064	0.0029549	1.00205	0.956878	0.979394
ITPK1	3705	0.00350209	1.00243	0.96111	0.983088
MYOD1	4654	-0.00338309	-1.00235	0.967577	0.989112

## Sheet: p300 binding_DE_LumB
Gene	Ensemble	log2FC	FC	pvalue	qvalue
FOXM1	2305	3.81107	14.0361	2.02702e-134	7.56669e-132
BIRC5	332	4.25537	19.0983	5.01569e-119	6.64369e-117
EBF1	1879	-3.32323	-10.009	3.57019e-105	2.66544e-103
MAML2	84441	-3.20942	-9.2498	6.53659e-105	4.84486e-103
E2F1	1869	2.85207	7.22036	6.61058e-100	3.91129e-98
MYBL2	4605	4.12021	17.3902	1.60711e-99	9.32079e-98
ETS2	2114	-1.98996	-3.97225	1.17902e-97	6.32022e-96
HLF	3131	-4.5442	-23.3314	2.11822e-97	1.12375e-95
FOXO1	2308	-2.32868	-5.02346	1.38226e-93	6.27858e-92
TAL1	6886	-2.50096	-5.66062	1.54155e-91	6.47231e-90
RECQL4	9401	3.17459	9.02913	3.76655e-91	1.54046e-89
PROX1	5629	-3.72871	-13.2573	1.39451e-89	5.44308e-88
HOXA9	3205	-3.34566	-10.1659	2.07193e-87	7.35965e-86
NR3C2	4306	-3.19312	-9.14584	2.51502e-86	8.59165e-85
PPARG	5468	-3.56254	-11.815	5.284e-86	1.7843e-84
PCNA	5111	1.4975	2.82353	1.27398e-85	4.25302e-84
EGR1	1958	-3.80027	-13.9314	6.18993e-82	1.80776e-80
PPARGC1A	10891	-3.56248	-11.8144	2.4298e-81	6.93829e-80
KLF4	9314	-3.01359	-8.07572	6.93056e-79	1.81494e-77
FEN1	2237	1.58779	3.00588	1.81918e-78	4.72182e-77
GATA3	2625	2.65548	6.30055	1.29671e-77	3.28272e-76
PPARA	5465	-2.18157	-4.53647	4.2223e-75	9.87335e-74
ESR1	2099	2.59532	6.04322	1.64827e-74	3.78955e-73
STAT5A	6776	-1.97841	-3.94058	3.9988e-73	8.77129e-72
NR3C1	2908	-2.02546	-4.07121	3.94551e-69	7.69281e-68
KLF6	1316	-1.6525	-3.14378	2.06002e-68	3.9089e-67
SGK1	6446	-2.07628	-4.21718	7.38755e-68	1.37137e-66
HES6	55502	2.7419	6.68952	8.30566e-67	1.4854e-65
MEF2C	4208	-1.69601	-3.24004	3.43011e-66	6.02426e-65
MAF	4094	-1.61886	-3.07133	7.68559e-64	1.26741e-62
DUSP1	1843	-2.7306	-6.63733	5.14888e-63	8.16937e-62
FOS	2353	-3.54003	-11.632	1.06094e-62	1.67041e-61
PARP1	142	1.14205	2.20694	4.10995e-62	6.32545e-61
TP63	8626	-4.4995	-22.6196	5.83435e-62	8.92586e-61
GTF3C1	2975	1.01198	2.01668	6.87806e-61	1.01959e-59
FOXO4	4303	-1.27226	-2.4154	2.1727e-60	3.1436e-59
STAT5B	6777	-1.42722	-2.68929	1.6182e-59	2.27869e-58
RPS6KA3	6197	-1.82017	-3.53123	6.7573e-59	9.33608e-58
JUN	3725	-2.05787	-4.1637	5.1761e-58	6.9777e-57
ZNF521	25925	-2.11556	-4.33357	2.71442e-55	3.38165e-54
SATB1	6304	-2.13363	-4.38821	4.36132e-54	5.18485e-53
HAND2	9464	-2.10927	-4.31474	5.69479e-54	6.72726e-53
RARA	5914	1.37299	2.59008	9.22263e-52	1.01856e-50
KAT2B	8850	-1.5431	-2.9142	5.65466e-50	5.95974e-49
HOXA10	3206	-2.33234	-5.03621	1.12624e-49	1.17435e-48
MECOM	2122	-1.65664	-3.15282	3.54817e-48	3.49892e-47
NOTCH1	4851	-1.14387	-2.20973	7.17968e-48	7.00599e-47
ETS1	2113	-1.44871	-2.72963	3.88675e-47	3.6706e-46
SRF	6722	-0.881513	-1.84231	1.78205e-46	1.65853e-45
IRF7	3665	1.78656	3.4499	2.20683e-46	2.04738e-45
BRCA1	672	1.39585	2.63144	2.34756e-46	2.17597e-45
BCL6	604	-1.48616	-2.80143	8.08693e-46	7.37596e-45
KLF2	10365	-1.78274	-3.4408	8.47876e-46	7.7162e-45
NR4A1	3164	-2.6455	-6.25714	2.37514e-45	2.12665e-44
THRB	7068	-1.80214	-3.48737	6.55378e-45	5.78236e-44
TGFB1I1	7041	-1.36604	-2.57762	1.17608e-41	9.2478e-41
TRIP10	9322	-1.05339	-2.0754	1.42669e-41	1.11756e-40
SMARCA4	6597	0.872665	1.83104	1.48937e-41	1.16577e-40
MYBL1	4603	2.02013	4.0562	1.77199e-41	1.38382e-40
MED25	81857	0.937904	1.91574	2.33971e-41	1.81407e-40
HBP1	26959	-0.64728	-1.56621	1.52133e-40	1.14917e-39
ANAPC7	51434	0.566455	1.48088	3.47637e-38	2.42437e-37
CEBPA	1050	-1.81217	-3.5117	2.10846e-37	1.42024e-36
KLF13	51621	-1.08673	-2.12392	5.13709e-37	3.40884e-36
DCP1A	55802	-0.701017	-1.62565	6.94446e-37	4.5948e-36
HOXD4	3233	-1.82412	-3.5409	2.83338e-36	1.82874e-35
ALX1	8092	-1.34222	-2.5354	1.48565e-35	9.3421e-35
ETV1	2115	-1.57377	-2.97681	9.8445e-35	6.03336e-34
RORA	6095	-1.06867	-2.0975	1.04604e-34	6.39937e-34
E2F5	1875	1.38837	2.61783	1.37247e-34	8.35652e-34
KLF5	688	-2.21623	-4.64677	2.20379e-34	1.33351e-33
GATA6	2627	-1.45949	-2.75012	4.41469e-34	2.63866e-33
CHD9	80205	-1.07826	-2.11149	1.36341e-33	8.00006e-33
ROCK2	9475	-1.30049	-2.46313	3.85253e-33	2.22368e-32
HIST2H2BE	8349	1.81784	3.52554	1.10754e-32	6.29364e-32
MYB	4602	2.12174	4.35217	1.12642e-32	6.39559e-32
CHD4	1108	0.476499	1.39136	2.76664e-32	1.54437e-31
HOXD10	3236	-1.78214	-3.43937	3.01432e-32	1.67943e-31
NCOA1	8648	-0.743477	-1.67421	2.11255e-31	1.1375e-30
MYC	4609	-1.44231	-2.71756	1.23703e-30	6.48392e-30
PAX3	5077	-1.80491	-3.49407	3.93178e-30	2.01859e-29
FUS	2521	0.74954	1.68126	2.82046e-29	1.40448e-28
GAPDH	2597	0.835877	1.78494	3.25526e-29	1.61669e-28
ERAL1	26284	0.614247	1.53076	7.29502e-29	3.56945e-28
ZFPM2	23414	-1.50351	-2.83532	9.51715e-29	4.63904e-28
NFE2L2	4780	-0.607587	-1.52371	1.39862e-28	6.78843e-28
SIRT2	22933	-0.570729	-1.48527	1.45895e-28	7.07457e-28
DAXX	1616	0.555982	1.47017	2.04973e-28	9.88095e-28
ELK1	2002	0.435957	1.35281	1.29275e-27	6.06108e-27
SMAD4	4089	-0.602393	-1.51823	1.94315e-27	9.04848e-27
TARBP2	6895	0.65517	1.5748	2.56446e-27	1.18717e-26
ZEB1	6935	-1.19508	-2.28958	1.32588e-26	5.96052e-26
AHR	196	-1.15128	-2.22111	1.40745e-26	6.31889e-26
CLTC	1213	0.914695	1.88517	1.62024e-26	7.25362e-26
GAK	2580	0.720692	1.64797	2.16699e-26	9.6383e-26
STAT4	6775	-1.67402	-3.19104	1.77416e-25	7.57282e-25
NFATC1	4772	-0.994781	-1.99278	1.99909e-25	8.50286e-25
PTEN	5728	-0.691879	-1.61539	2.12974e-25	9.04919e-25
HERC1	8925	-0.793309	-1.73304	3.16036e-25	1.33509e-24
GABPA	2551	-0.57048	-1.48502	4.67603e-25	1.96487e-24
SREBF1	6720	1.11909	2.1721	1.32302e-24	5.46538e-24
CNOT3	4849	0.476358	1.39123	2.36669e-24	9.69289e-24
TSG101	7251	0.479124	1.3939	3.09604e-24	1.26296e-23
PLAG1	5324	-1.45373	-2.73916	4.10058e-24	1.66414e-23
EID3	493861	-1.15685	-2.2297	4.47585e-24	1.81393e-23
CITED1	4435	-2.77997	-6.86839	5.65862e-24	2.28785e-23
CEBPD	1052	-1.34313	-2.53702	6.27201e-24	2.53336e-23
CCND1	595	1.53515	2.89818	1.22681e-23	4.89461e-23
PAX6	5080	-0.743765	-1.67454	1.46792e-22	5.63326e-22
UBTF	7343	0.427079	1.34451	5.26685e-22	1.9783e-21
KLF1	10661	0.837045	1.78639	1.16666e-21	4.32047e-21
CDC25B	994	0.861347	1.81673	1.31599e-21	4.85945e-21
YBX1	4904	-0.597918	-1.51353	1.48502e-21	5.47083e-21
PML	5371	-0.563032	-1.47737	4.423e-21	1.60213e-20
DHX9	1660	0.375849	1.2976	4.93151e-21	1.78286e-20
TFAP2A	7020	1.59075	3.01205	6.76632e-21	2.43291e-20
TRERF1	55809	1.0342	2.04798	9.19844e-21	3.29127e-20
CITED2	10370	-0.996556	-1.99523	1.18824e-20	4.2361e-20
RUNX3	864	-1.25607	-2.38845	1.75739e-20	6.21549e-20
CHD2	1106	-0.480039	-1.39478	4.81247e-20	1.67267e-19
POLB	5423	0.867429	1.82441	6.80308e-20	2.34628e-19
CARM1	10498	0.485203	1.39978	1.15292e-19	3.93853e-19
JUNB	3726	-1.15909	-2.23317	1.29504e-19	4.41377e-19
NFATC2	4773	-1.38743	-2.61612	9.23022e-19	3.04329e-18
MSH6	2956	0.4604	1.37592	1.91062e-18	6.22552e-18
HDAC1	3065	0.534771	1.44871	2.48299e-18	8.05472e-18
DDX17	10521	-0.453543	-1.3694	4.31085e-18	1.38616e-17
CEBPB	1051	-0.834087	-1.78273	5.79985e-18	1.85593e-17
FGFR1	2260	-1.25606	-2.38843	6.59359e-18	2.10566e-17
STAT6	6778	-0.567856	-1.48232	1.33471e-17	4.20031e-17
WT1	7490	2.56328	5.91048	2.09575e-17	6.54018e-17
AKT1	207	0.520496	1.43445	2.72688e-17	8.4711e-17
DDX24	57062	-0.3723	-1.29441	3.66212e-17	1.12995e-16
TDG	6996	0.464647	1.37998	6.00651e-17	1.83621e-16
ASCL1	429	3.16962	8.9981	6.56709e-17	2.00489e-16
WRN	7486	-0.653539	-1.57302	1.01167e-16	3.06578e-16
FOXO3	2309	-0.688679	-1.61181	1.31828e-16	3.98081e-16
HIST4H4	121504	1.221	2.33109	2.17924e-16	6.51741e-16
MSX1	4487	-1.02654	-2.03713	2.34782e-16	7.00728e-16
STAT1	6772	0.929671	1.90484	3.27177e-16	9.70984e-16
CTNNB1	1499	-0.504678	-1.41881	5.41881e-16	1.59412e-15
HSF1	3297	0.605047	1.52103	8.08765e-16	2.364e-15
ATF5	22809	0.569462	1.48397	1.88629e-15	5.42704e-15
MSH2	4436	0.439446	1.35608	2.21368e-15	6.34497e-15
JMY	133746	-0.653659	-1.57315	7.56716e-15	2.11808e-14
ING5	84289	-0.490364	-1.4048	8.03897e-15	2.24678e-14
HBZ	3050	-0.421263	-1.3391	1.28477e-14	3.56118e-14
MAPK14	1432	-0.349146	-1.27381	2.19497e-14	6.01587e-14
SRCAP	10847	0.361201	1.28449	4.25085e-14	1.14986e-13
ATN1	1822	-0.374499	-1.29639	5.63086e-14	1.51537e-13
CREB1	1385	-0.343683	-1.26899	6.6925e-14	1.79636e-13
PSMC5	5705	0.54122	1.4552	7.30446e-14	1.95755e-13
SOX4	6659	0.694816	1.61868	9.23749e-14	2.46401e-13
SIRT1	23411	-0.417648	-1.33575	1.21651e-13	3.22689e-13
TCF3	6929	0.500282	1.41449	1.47756e-13	3.8982e-13
PIAS3	10401	0.490321	1.40476	1.62824e-13	4.29022e-13
CRTC2	200186	0.32536	1.25298	2.66149e-13	6.93263e-13
NBN	4683	0.487069	1.40159	3.23336e-13	8.39668e-13
ING2	3622	0.457157	1.37283	3.72902e-13	9.65088e-13
MAFG	4097	-0.48683	-1.40136	3.85923e-13	9.98033e-13
ZBTB7B	51043	0.523526	1.43746	5.6497e-13	1.44956e-12
PIAS1	8554	-0.438205	-1.35492	9.02535e-13	2.29445e-12
VRK1	7443	0.423867	1.34152	9.91142e-13	2.51472e-12
NPAT	4863	-0.483589	-1.39822	1.9543e-12	4.88897e-12
MDM2	4193	0.589083	1.50429	2.31897e-12	5.78433e-12
RPS6KA5	9252	-0.677737	-1.59963	4.50495e-12	1.10941e-11
ARNT	405	-0.356219	-1.28007	9.26664e-12	2.24673e-11
RBBP4	5928	0.343945	1.26922	1.17888e-11	2.84213e-11
KHDRBS1	10657	0.196446	1.14587	1.19153e-11	2.87196e-11
GATA4	2626	1.92683	3.80219	1.4078e-11	3.38489e-11
HIPK2	28996	-0.787979	-1.72665	1.44124e-11	3.46245e-11
MTF1	4520	-0.394584	-1.31456	3.9954e-11	9.38769e-11
ATF4	468	-0.360095	-1.28351	4.22834e-11	9.9167e-11
SS18L1	26039	0.459446	1.37501	4.26716e-11	1.00033e-10
TLX1	3195	1.21746	2.32537	4.3943e-11	1.02943e-10
GMEB2	26205	0.341974	1.26749	6.6633e-11	1.54756e-10
RBCK1	10616	0.404978	1.32407	9.53741e-11	2.19743e-10
ELF3	1999	1.16239	2.23828	2.16069e-10	4.90341e-10
SMAD2	4087	-0.287877	-1.22084	2.63174e-10	5.95135e-10
KAT2A	2648	0.489914	1.40436	2.81597e-10	6.35745e-10
RUNX2	860	0.85138	1.80423	4.72718e-10	1.05585e-09
TBX21	30009	-0.982267	-1.97557	5.07792e-10	1.1321e-09
PCMT1	5110	0.339769	1.26555	9.07336e-10	1.99598e-09
TTF1	7270	-0.253793	-1.19234	1.11263e-09	2.43559e-09
FOXL1	2300	-0.621843	-1.53884	1.35113e-09	2.942e-09
NFYA	4800	0.30261	1.23337	1.95054e-09	4.21721e-09
NFKB1	4790	-0.338912	-1.2648	2.64445e-09	5.68098e-09
YY1	7528	0.234431	1.17644	2.69188e-09	5.77925e-09
SOX9	6662	-0.993724	-1.99132	5.0821e-09	1.07901e-08
ZBTB2	57621	0.375846	1.2976	5.71951e-09	1.21121e-08
TAF1	6872	-0.33498	-1.26136	6.93449e-09	1.46143e-08
NFATC4	4776	0.698517	1.62284	8.00449e-09	1.68123e-08
MIER1	57708	-0.319615	-1.248	8.32456e-09	1.74738e-08
RPS6KA1	6195	0.525206	1.43914	1.04935e-08	2.18834e-08
MN1	4330	-0.767239	-1.70201	1.26621e-08	2.62962e-08
HOXB9	3219	0.864821	1.82111	1.89831e-08	3.90171e-08
PRMT5	10419	0.285927	1.21919	2.7141e-08	5.52918e-08
SMARCB1	6598	0.302199	1.23302	2.73693e-08	5.57404e-08
CDK5RAP3	80279	0.412229	1.33074	2.97799e-08	6.05297e-08
CTBP2	1488	0.407068	1.32599	3.66684e-08	7.41641e-08
APEX1	328	0.261136	1.19842	4.2261e-08	8.50982e-08
HIST3H2A	92815	1.28272	2.43297	4.61555e-08	9.26222e-08
EID1	23741	-0.328271	-1.25551	7.35887e-08	1.46131e-07
BTRC	8945	0.37836	1.29986	9.48754e-08	1.87207e-07
NUDT21	11051	-0.290711	-1.22324	9.57358e-08	1.88832e-07
PELP1	27043	0.293435	1.22555	1.57076e-07	3.06028e-07
IRF2	3660	-0.202817	-1.15094	2.57768e-07	4.9576e-07
SMAD3	4088	-0.373298	-1.29531	2.97242e-07	5.69705e-07
EWSR1	2130	0.199551	1.14834	3.72251e-07	7.09166e-07
PLAGL2	5326	0.291988	1.22433	4.00775e-07	7.62092e-07
SERTAD1	29950	-0.412051	-1.33058	4.15507e-07	7.88937e-07
CITED4	163732	-1.0427	-2.06008	5.12832e-07	9.69161e-07
HNF1A	6927	0.524839	1.43877	5.37168e-07	1.01394e-06
CUX1	1523	0.350181	1.27472	8.20499e-07	1.53282e-06
SP1	6667	-0.202856	-1.15097	8.5376e-07	1.59305e-06
SOX2	6657	1.32618	2.50738	1.66389e-06	3.04659e-06
TAX1BP3	30851	-0.334257	-1.26073	1.69545e-06	3.10271e-06
HOXB4	3214	-0.866473	-1.8232	2.3985e-06	4.34592e-06
NCOR1	9611	-0.360033	-1.28346	2.73271e-06	4.93319e-06
MAPK1	5594	-0.236516	-1.17814	2.95512e-06	5.32347e-06
NCOA3	8202	0.331052	1.25793	3.89592e-06	6.96025e-06
CIITA	4261	-0.618947	-1.53575	4.7271e-06	8.40351e-06
CTBP1	1487	0.240824	1.18167	5.64403e-06	9.98945e-06
SS18	6760	0.19475	1.14453	5.91417e-06	1.04487e-05
GTF2F1	2962	0.231927	1.1744	1.16477e-05	2.02523e-05
TP73	7161	0.717826	1.6447	1.35306e-05	2.34269e-05
RAD23A	5886	0.238031	1.17938	1.51601e-05	2.61732e-05
TCF12	6938	-0.237625	-1.17905	1.7417e-05	2.99513e-05
FHL2	2274	-0.650002	-1.56917	2.04775e-05	3.50528e-05
VDR	7421	0.473569	1.38854	2.63776e-05	4.48199e-05
NR5A1	2516	-0.368782	-1.29126	3.85026e-05	6.47524e-05
GTF2B	2959	-0.172015	-1.12663	4.02598e-05	6.75802e-05
STAT3	6774	-0.23254	-1.1749	4.4704e-05	7.48567e-05
HOXB1	3211	0.325848	1.2534	5.4412e-05	9.05881e-05
EYA1	2138	-0.98804	-1.98349	5.9291e-05	9.84475e-05
SNIP1	79753	-0.167493	-1.12311	6.29782e-05	0.000104401
POU3F2	5454	0.467941	1.38313	6.65455e-05	0.000110146
GATA5	140628	0.994683	1.99264	9.37182e-05	0.000153464
ATF2	1386	-0.298228	-1.22963	9.64443e-05	0.000157789
RB1	5925	-0.283027	-1.21675	9.74685e-05	0.000159363
VRK2	7444	0.339589	1.2654	0.000104815	0.000171022
FBXO3	26273	-0.191512	-1.14196	0.000122139	0.000198484
SUB1	10923	0.320923	1.24913	0.000151554	0.000244716
NFKB2	4791	0.271431	1.207	0.000158086	0.000254902
ING1	3621	0.329195	1.25631	0.000165564	0.000266624
IKBKG	8517	0.222955	1.16712	0.000332867	0.000525214
NUP93	9688	0.191497	1.14195	0.000336286	0.000530406
MDC1	9656	0.189824	1.14062	0.000345838	0.000545094
ING4	51147	-0.204249	-1.15209	0.00040207	0.000630578
NEDD1	121441	0.203036	1.15112	0.000513359	0.000798286
HOXB2	3212	0.661203	1.5814	0.000582938	0.000901907
MAGEA11	4110	0.453713	1.36956	0.000662041	0.00101983
RAD50	10111	0.203542	1.15152	0.000675806	0.00103956
AP1B1	162	0.190391	1.14107	0.000681006	0.00104709
ANAPC5	51433	0.119083	1.08604	0.000702049	0.00107839
IRF1	3659	0.306265	1.2365	0.000783943	0.00119934
SMAD1	4086	-0.172754	-1.12721	0.000810591	0.00123835
GMEB1	10691	-0.166856	-1.12261	0.00101439	0.001537
OGG1	4968	0.157195	1.11512	0.00115845	0.00174703
TAF15	8148	0.214235	1.16009	0.00121497	0.00182985
VHL	7428	0.210335	1.15696	0.00171654	0.00255509
ONECUT1	3175	0.251759	1.19066	0.0017736	0.00263723
HIST3H3	8290	0.121023	1.08751	0.00218214	0.00322244
NRIP1	8204	0.286374	1.21957	0.00321709	0.00468706
IRF3	3661	0.231491	1.17405	0.00323712	0.00471523
ATF1	466	-0.13398	-1.09732	0.00354219	0.00514356
TP53BP1	7158	0.187056	1.13844	0.00377723	0.00547478
SPI1	6688	0.297799	1.22927	0.00752535	0.0106107
HIF1A	3091	-0.281367	-1.21535	0.00796084	0.0112032
CDX2	1045	-0.14985	-1.10945	0.00836454	0.01174
PAX5	5079	-0.428773	-1.34609	0.0105042	0.0146152
ETV4	2118	-0.549818	-1.4639	0.0105234	0.014639
TBP	6908	-0.116695	-1.08425	0.0140232	0.0192428
CD44	960	-0.286866	-1.21999	0.0147098	0.0201405
ITPK1	3705	0.192721	1.14292	0.0192853	0.026101
PRKAA2	5563	-0.540773	-1.45475	0.0285277	0.0379832
HOXD13	3239	-0.257259	-1.19521	0.0287333	0.0382396
CREM	1390	-0.114567	-1.08265	0.029633	0.0393656
HNF4A	3172	0.153434	1.11221	0.0301173	0.0399753
ATR	545	-0.122293	-1.08846	0.0320058	0.0423123
NEUROD1	4760	0.209019	1.1559	0.0439415	0.0572838
SMAD7	4092	-0.111531	-1.08037	0.044036	0.0573961
GATA1	2623	-0.185932	-1.13755	0.0443275	0.057754
DACH1	1602	0.372256	1.29438	0.0453612	0.0590372
HTT	3064	0.126571	1.0917	0.0502802	0.065109
POU2F3	25833	0.26665	1.20301	0.0615868	0.0789288
ATG7	10533	0.0662044	1.04696	0.0633475	0.0810588
NUP98	4928	-0.083843	-1.05984	0.0747663	0.094913
NR2F2	7026	-0.214968	-1.16068	0.07596	0.0963568
FOXA2	3170	-0.122754	-1.08881	0.0805567	0.101923
EIF2B1	1967	-0.0636681	-1.04512	0.0848973	0.107059
ZNF148	7707	-0.0922666	-1.06604	0.0893382	0.112355
CRX	1406	-0.0454485	-1.032	0.0921887	0.115777
DDX5	1655	-0.0814193	-1.05806	0.0953728	0.119556
TAZ	6901	0.106325	1.07648	0.102783	0.128306
PDX1	3651	0.0978122	1.07015	0.10586	0.131921
CENPJ	55835	-0.112403	-1.08103	0.108992	0.135669
HOXB7	3217	-0.227296	-1.17064	0.109468	0.136213
CHUK	1147	0.0769259	1.05477	0.112355	0.139634
TNP2	7142	-0.0113263	-1.00788	0.119304	0.147646
CDK9	1025	0.0653629	1.04635	0.135119	0.166065
PHOX2B	8929	-0.0366098	-1.0257	0.139154	0.170596
OLIG2	10215	0.058618	1.04147	0.155683	0.189311
SPIB	6689	-0.248404	-1.18789	0.173029	0.208895
HDAC6	10013	-0.0541743	-1.03826	0.182449	0.219454
EID2	163126	0.0599267	1.04241	0.189201	0.227017
EMB	133418	-0.186264	-1.13781	0.191246	0.229203
AR	367	0.203417	1.15142	0.212541	0.252804
ZBTB17	7709	0.0846065	1.0604	0.215758	0.256379
CDK8	1024	-0.0908881	-1.06503	0.216691	0.257413
HOXB6	3216	0.228224	1.17139	0.245077	0.288233
MAP3K1	4214	-0.1189	-1.08591	0.254508	0.298487
SNW1	22938	0.044218	1.03112	0.254548	0.2985
SP3	6670	-0.0548726	-1.03877	0.272038	0.317468
DBP	1628	0.101653	1.073	0.276392	0.322128
MEF2D	4209	0.0542083	1.03829	0.296591	0.343738
EYA3	2140	-0.103795	-1.0746	0.303504	0.351154
NEUROG1	4762	0.0110208	1.00767	0.326109	0.374628
GATA2	2624	0.158343	1.116	0.38589	0.437181
SREBF2	6721	0.0636184	1.04508	0.389342	0.440612
HOXA11	3207	0.112473	1.08108	0.394598	0.445774
HNF1B	6928	-0.0617826	-1.04375	0.424238	0.476322
SKP2	6502	0.0619886	1.0439	0.436612	0.488479
XAF1	54739	-0.0881283	-1.06299	0.521922	0.573901
RUNX1	861	0.0631894	1.04477	0.524275	0.576164
RELA	5970	-0.0247114	-1.01728	0.554369	0.605831
GTF2E2	2961	-0.0359393	-1.02522	0.579068	0.629906
NCOA2	10499	-0.069763	-1.04954	0.603697	0.654098
TTC5	91875	0.0267232	1.0187	0.604439	0.654799
GLI3	2737	-0.0521448	-1.03681	0.622288	0.672149
POLR2A	5430	-0.0248779	-1.01739	0.646254	0.694709
POU1F1	5449	-0.0149329	-1.0104	0.66264	0.710167
HOXB3	3213	-0.0715514	-1.05085	0.685602	0.731968
GPS2	2874	-0.0187122	-1.01305	0.709993	0.754848
XRCC6	2547	-0.0127475	-1.00888	0.755705	0.79705
HOXD12	3238	0.00337118	1.00234	0.806065	0.84229
AIRE	326	-0.0089496	-1.00622	0.81426	0.849599
REG3A	5068	0.0013218	1.00092	0.826874	0.861404
MYOD1	4654	-0.0130353	-1.00908	0.856002	0.887695
TP53	7157	0.0127719	1.00889	0.876135	0.906101
PAX8	7849	-0.0233398	-1.01631	0.890464	0.919253
STAT2	6773	-0.00201551	-1.0014	0.970703	0.991025
