# Supplementary material for: Pharmacological Inhibition of CBP/p300 Blocks Estrogen Receptor Alpha (ERα) Function through Suppressing Enhancer H3K27 Acetylation in Luminal Breast Cancer
Source: Cancers (Basel). 2021 Jun 4;13(11):2799. doi: 10.3390/cancers13112799 (PMC8200112; doi:10.3390/cancers13112799)
Supplement: Supplementary file 1 [file cancers-13-02799-s001.zip › Table S2.xlsx]

## Sheet: A-485 Microarray_DE Genes
	ID	seqname	strand	start	stop	geneSymbol	geneFullName	logFC	FC	pvalue	qvalue
46525	TC13000320.hg.1	chr13	+	90883436	90883531	MIR622	microRNA 622	-1.07712	-2.10982	8.79602e-06	0.163294
59506	TC19000583.hg.1	chr19	+	42212504	42234437	CEACAM5	carcinoembryonic antigen-related cell adhesion molecule 5	-0.83505	-1.78392	1.34773e-05	0.163294
37286	TC10000721.hg.1	chr10	+	102106772	102124591	SCD	stearoyl-CoA desaturase (delta-9-desaturase)	-1.21833	-2.32677	2.11514e-05	0.163294
58392	TC18000458.hg.1	chr18	-	33688494	33709357	SLC39A6	solute carrier family 39 (zinc transporter), member 6	-1.20226	-2.301	2.61324e-05	0.163294
16160	TC04001530.hg.1	chr4	-	125585204	125633887	ANKRD50	ankyrin repeat domain 50	-0.9798	-1.97219	3.57557e-05	0.163294
38218	TC10001678.hg.1	chr10	-	117816442	118033126	GFRA1	GDNF family receptor alpha 1	-0.70631	-1.63162	4.22921e-05	0.163294
57894	TC17002906.hg.1	chr17	-	39679869	39684641	KRT19	keratin 19	-0.813725	-1.75774	4.54846e-05	0.163294
40203	TC11000718.hg.1	chr11	+	69455855	69469242	CCND1	cyclin D1	-0.949136	-1.93072	5.18328e-05	0.163294
50466	TC15000270.hg.1	chr15	+	39873127	39891667	THBS1	thrombospondin 1	-0.633834	-1.55168	5.77155e-05	0.163294
1174	TC01001197.hg.1	chr1	+	150954493	150968114	ANXA9	annexin A9	-0.792623	-1.73222	5.77627e-05	0.163294
36778	TC10000199.hg.1	chr10	+	28966271	28971868	BAMBI	BMP and activin membrane-bound inhibitor homolog (Xenopus laevis)	-0.619216	-1.53604	5.96122e-05	0.163294
13195	TC03001948.hg.1	chr3	-	158363611	158390482	LXN	latexin	-0.861564	-1.81701	6.81718e-05	0.163294
34453	TC0X000571.hg.1	chrX	+	115567747	115592625	SLC6A14	solute carrier family 6 (amino acid transporter), member 14	-0.531583	-1.44551	7.99133e-05	0.163294
25982	TC07000964.hg.1	chr7	+	147592371	147797648	MIR548F3	microRNA 548f-3	-0.584375	-1.49939	8.02272e-05	0.163294
41614	TC11002162.hg.1	chr11	-	85405265	85522184	SYTL2	synaptotagmin-like 2	-0.551107	-1.46521	8.16335e-05	0.163294
8070	TC02001790.hg.1	chr2	-	43449541	43453748	ZFP36L2	ZFP36 ring finger protein-like 2	-0.844955	-1.79621	8.43381e-05	0.163294
55814	TC17000796.hg.1	chr17	+	65736785	65736917	SNORA38B	small nucleolar RNA, H/ACA box 38B	0.559404	1.47366	8.49708e-05	0.163294
29416	TC08001062.hg.1	chr8	-	23699428	23712320	STC1	stanniocalcin 1	-0.784862	-1.72293	9.42142e-05	0.170999
55808	TC17000790.hg.1	chr17	+	64960980	65029518	CACNG4	calcium channel, voltage-dependent, gamma subunit 4	-0.925046	-1.89875	0.000107741	0.185258
44451	TC12001539.hg.1	chr12	-	53290971	53343650	KRT8	keratin 8	-0.924851	-1.89849	0.000116007	0.189497
15971	TC04001335.hg.1	chr4	-	83405604	83483510	TMEM150C	transmembrane protein 150C	-0.537778	-1.45173	0.000130953	0.201504
43367	TC12000424.hg.1	chr12	+	53342655	53346690	KRT18	keratin 18	-0.907555	-1.87586	0.000135693	0.201504
53515	TC16000559.hg.1	chr16	+	68771128	68869444	CDH1	cadherin 1, type 1, E-cadherin (epithelial)	-0.681786	-1.60412	0.000145768	0.204558
18935	TC05001385.hg.1	chr5	-	57749809	57756087	PLK2	polo-like kinase 2	-0.700862	-1.62548	0.000165708	0.204558
21634	TC06000675.hg.1	chr6	+	54711569	54806880	FAM83B	family with sequence similarity 83, member B	-0.817862	-1.76279	0.000166959	0.204558
51709	TC15001541.hg.1	chr15	-	63613577	63674360	CA12	carbonic anhydrase XII	-0.690089	-1.61338	0.000171649	0.204558
22053	TC06001102.hg.1	chr6	+	151773422	151791236	C6orf211	chromosome 6 open reading frame 211	-0.491973	-1.40637	0.000173462	0.204558
28508	TC08000127.hg.1	chr8	+	17354597	17428082	SLC7A2	solute carrier family 7 (cationic amino acid transporter, y+ system), member 2	-0.547578	-1.46163	0.000175317	0.204558
33949	TC0X000053.hg.1	chrX	+	12993226	12995346	TMSB4X	thymosin beta 4, X-linked	-0.679217	-1.60127	0.000199042	0.224231
56762	TC17001769.hg.1	chr17	-	59756547	59940920	BRIP1	BRCA1 interacting protein C-terminal helicase 1	-0.476798	-1.39165	0.000246076	0.261709
59113	TC19000180.hg.1	chr19	+	10713121	10755235	SLC44A2	solute carrier family 44, member 2	-0.514237	-1.42824	0.000260013	0.261709
59452	TC19000527.hg.1	chr19	+	38865176	38874464	PSMD8	proteasome (prosome, macropain) 26S subunit, non-ATPase, 8	0.474031	1.38898	0.000262202	0.261709
22258	TC06001313.hg.1	chr6	-	20100935	20212670	MBOAT1	membrane bound O-acyltransferase domain containing 1	-0.454116	-1.36994	0.000267961	0.261709
923	TC01000939.hg.1	chr1	+	109656585	109749403	KIAA1324	KIAA1324	-0.40656	-1.32552	0.000272363	0.261709
16221	TC04001592.hg.1	chr4	-	141541919	141677471	TBC1D9	TBC1 domain family, member 9 (with GRAM domain)	-0.444293	-1.36065	0.000282719	0.263898
54268	TC16001335.hg.1	chr16	-	87863622	87903125	SLC7A5	solute carrier family 7 (amino acid transporter light chain, L system), member 5	-0.402015	-1.32135	0.00030717	0.268347
51116	TC15000936.hg.1	chr15	+	96869157	96883492	NR2F2	nuclear receptor subfamily 2, group F, member 2	-0.414297	-1.33265	0.00032262	0.268347
32558	TC09001618.hg.1	chr9	-	130702858	130742812	FAM102A	family with sequence similarity 102, member A	-0.4632	-1.3786	0.000325387	0.268347
22039	TC06001088.hg.1	chr6	+	150263136	150270371	ULBP2	UL16 binding protein 2	0.411598	1.33016	0.000327105	0.268347
29181	TC08000814.hg.1	chr8	+	144099399	144105249	LY6E	lymphocyte antigen 6 complex, locus E	-0.531395	-1.44533	0.000328555	0.268347
59123	TC19000191.hg.1	chr19	+	11200038	11244505	LDLR	low density lipoprotein receptor	-0.39407	-1.3141	0.000356299	0.269051
2375	TC01002426.hg.1	chr1	-	28905255	28905334	SNORD99	small nucleolar RNA, C/D box 99	0.59835	1.51398	0.000373568	0.269051
50398	TC15000202.hg.1	chr15	+	32576353	32576459	RNU6-18	RNA, U6 small nuclear 18	0.619124	1.53594	0.000379157	0.269051
51310	TC15001135.hg.1	chr15	-	30546605	30546711	RNU6-17	RNA, U6 small nuclear 17	0.619124	1.53594	0.000379157	0.269051
34465	TC0X000583.hg.1	chrX	+	118556880	118557510	OTTHUMG00000022274	NULL	-0.370352	-1.29267	0.000410715	0.269051
36650	TC10000070.hg.1	chr10	+	8095567	8117164	GATA3	GATA binding protein 3	-0.683395	-1.60591	0.000414378	0.269051
59047	TC19000112.hg.1	chr19	+	6361463	6368915	CLPP	ClpP caseinolytic peptidase, ATP-dependent, proteolytic subunit homolog (E. coli)	0.384294	1.30522	0.000419612	0.269051
44341	TC12001426.hg.1	chr12	-	46576841	46663208	SLC38A1	solute carrier family 38, member 1	-0.619386	-1.53622	0.000426298	0.269051
18267	TC05000701.hg.1	chr5	+	137801169	137805004	EGR1	early growth response 1	0.602501	1.51835	0.000427693	0.269051
21939	TC06000985.hg.1	chr6	+	132129156	132216295	ENPP1	ectonucleotide pyrophosphatase/phosphodiesterase 1	-0.400605	-1.32006	0.00042932	0.269051
22055	TC06001104.hg.1	chr6	+	151977826	152450754	ESR1	estrogen receptor 1	-0.361146	-1.28445	0.000433025	0.269051
56892	TC17001903.hg.1	chr17	-	74561461	74582145	ST6GALNAC2	ST6 (alpha-N-acetyl-neuraminyl-2,3-beta-galactosyl-1,3)-N-acetylgalactosaminide alpha-2,6-sialyltransferase 2	-0.455846	-1.37159	0.000433234	0.269051
37796	TC10001238.hg.1	chr10	-	47133295	47133836	HNRNPA1P33	heterogeneous nuclear ribonucleoprotein A1 pseudogene 33	-0.437082	-1.35386	0.000436477	0.269051
23182	TC06002265.hg.1	chr6	-	159186773	159240456	EZR	ezrin	-0.352688	-1.27694	0.000496923	0.297517
18190	TC05000621.hg.1	chr5	+	129450102	129450203	RNA5SP191	RNA, 5S ribosomal pseudogene 191	0.366607	1.28932	0.00050087	0.297517
59507	TC19000584.hg.1	chr19	+	42259329	42276113	CEACAM6	carcinoembryonic antigen-related cell adhesion molecule 6 (non-specific cross reacting antigen)	-0.383213	-1.30424	0.000535491	0.303418
13204	TC03001959.hg.1	chr3	-	161062580	161090668	SPTSSB	serine palmitoyltransferase, small subunit B	-0.444275	-1.36063	0.000545929	0.303418
8727	TC02002469.hg.1	chr2	-	160956177	161128399	ITGB6	integrin, beta 6	-0.348015	-1.27281	0.000553502	0.303418
36628	TC10000047.hg.1	chr10	+	5454514	5500426	NET1	neuroepithelial cell transforming 1	-0.350009	-1.27457	0.000553669	0.303418
18654	TC05001097.hg.1	chr5	-	535955	535997	MIR4456	microRNA 4456	-0.42281	-1.34054	0.000557242	0.303418
59868	TC19000963.hg.1	chr19	+	58874805	58874929	RNA5SP473	RNA, 5S ribosomal pseudogene 473	0.363655	1.28668	0.000567506	0.303941
46776	TC13000574.hg.1	chr13	-	37740489	37740795	RN7SKP1	RNA, 7SK small nuclear pseudogene 1	0.323113	1.25103	0.000654159	0.343643
9031	TC02002784.hg.1	chr2	-	219866362	219866431	MIR375	microRNA 375	0.4584	1.37402	0.000663265	0.343643
56751	TC17001758.hg.1	chr17	-	58120552	58156292	HEATR6	HEAT repeat containing 6	0.414314	1.33267	0.000673191	0.343643
16017	TC04001384.hg.1	chr4	-	91759636	91760263	TMSB4XP8	NULL	-1.21669	-2.32412	0.000716223	0.344823
53806	TC16000857.hg.1	chr16	-	10622279	10674555	EMP2	epithelial membrane protein 2	-0.417678	-1.33578	0.000756543	0.344823
56478	TC17001480.hg.1	chr17	-	39185929	39186377	KRTAP1-4	keratin associated protein 1-4	-0.345085	-1.27023	0.000763601	0.344823
56962	TC17001973.hg.1	chr17	-	80036214	80056106	FASN	fatty acid synthase	-0.443472	-1.35987	0.000785597	0.344823
35091	TC0X001223.hg.1	chrX	-	100888994	100889100	RNU6-30P	RNA, U6 small nuclear 30, pseudogene	0.36052	1.28389	0.000800414	0.344823
44909	TC12002004.hg.1	chr12	-	116396381	116715143	MED13L	mediator complex subunit 13-like	-0.3627	-1.28583	0.000880977	0.344823
32644	TC09001706.hg.1	chr9	-	137741455	137741528	MIR3689D1	microRNA 3689d-1	-0.332666	-1.25934	0.000884826	0.344823
29830	TC08001481.hg.1	chr8	-	101698044	101735037	PABPC1	poly(A) binding protein, cytoplasmic 1	-0.417447	-1.33556	0.000886219	0.344823
22469	TC06001529.hg.1	chr6	-	31504151	31504226	SNORD117	small nucleolar RNA, C/D box 117	0.386651	1.30736	0.000889829	0.344823
65953	TC6_apd_hap1000080.hg.1	chr6_apd_hap1	-	2818839	2818914	SNORD117	small nucleolar RNA, C/D box 117	0.386651	1.30736	0.000889829	0.344823
66144	TC6_cox_hap2000158.hg.1	chr6_cox_hap2	-	3013813	3013888	SNORD117	small nucleolar RNA, C/D box 117	0.386651	1.30736	0.000889829	0.344823
66379	TC6_dbb_hap3000147.hg.1	chr6_dbb_hap3	-	2789731	2789806	SNORD117	small nucleolar RNA, C/D box 117	0.386651	1.30736	0.000889829	0.344823
66590	TC6_mann_hap4000135.hg.1	chr6_mann_hap4	-	2847065	2847140	SNORD117	small nucleolar RNA, C/D box 117	0.386651	1.30736	0.000889829	0.344823
66790	TC6_mcf_hap5000135.hg.1	chr6_mcf_hap5	-	2883901	2883976	SNORD117	small nucleolar RNA, C/D box 117	0.386651	1.30736	0.000889829	0.344823
67018	TC6_qbl_hap6000150.hg.1	chr6_qbl_hap6	-	2797831	2797906	SNORD117	small nucleolar RNA, C/D box 117	0.386651	1.30736	0.000889829	0.344823
67222	TC6_ssto_hap7000130.hg.1	chr6_ssto_hap7	-	2834956	2835031	SNORD117	small nucleolar RNA, C/D box 117	0.386651	1.30736	0.000889829	0.344823
55793	TC17000775.hg.1	chr17	+	62223438	62223517	SNORD104	small nucleolar RNA, C/D box 104	0.414919	1.33322	0.000914543	0.344823
54987	TC16002054.hg.1	chr16	+	2563727	2570224	ATP6V0C	ATPase, H+ transporting, lysosomal 16kDa, V0 subunit c	0.526865	1.4408	0.000925898	0.344823
46514	TC13000309.hg.1	chr13	+	82264046	82265207	PTMAP5	NULL	-0.372825	-1.29489	0.000929916	0.344823
62498	TC20000913.hg.1	chr20	-	46285092	46415360	SULF2	sulfatase 2	-0.400108	-1.31961	0.0009302	0.344823
8704	TC02002445.hg.1	chr2	-	157180944	157198860	NR4A2	nuclear receptor subfamily 4, group A, member 2	0.394047	1.31407	0.0009459	0.344823
51734	TC15001568.hg.1	chr15	-	65845419	65845525	RNU6-19P	RNA, U6 small nuclear 19, pseudogene	0.376144	1.29787	0.000955649	0.344823
50092	TC14002223.hg.1	chr14	-	106354409	106354436	IGHD2-21	immunoglobulin heavy diversity 2-21	-0.556732	-1.47093	0.00096993	0.344823
18039	TC05000461.hg.1	chr5	+	95049226	95160087	RHOBTB3	Rho-related BTB domain containing 3	-0.360437	-1.28381	0.000971036	0.344823
63821	TC21000486.hg.1	chr21	-	43782391	43786703	TFF1	trefoil factor 1	-0.413126	-1.33157	0.000992277	0.345302
25528	TC07000485.hg.1	chr7	+	75931861	75933614	HSPB1	heat shock 27kDa protein 1	-0.438725	-1.35541	0.00101147	0.345302
56092	TC17001081.hg.1	chr17	-	7143333	7145772	GABARAP	GABA(A) receptor-associated protein	0.349652	1.27425	0.00101963	0.345302
6569	TC02000244.hg.1	chr2	+	38828740	38829320	OTTHUMG00000153432	NULL	0.383001	1.30405	0.00102523	0.345302
55851	TC17000834.hg.1	chr17	+	72744752	72765499	SLC9A3R1	solute carrier family 9, subfamily A (NHE3, cation proton antiporter 3), member 3 regulator 1	-0.63765	-1.55579	0.00103625	0.345454
56108	TC17001098.hg.1	chr17	-	7833663	7835317	TRAPPC1	trafficking protein particle complex 1	0.326407	1.25389	0.0010493	0.345918
28790	TC08000415.hg.1	chr8	+	62491130	62492230	KRT8	keratin 8	-0.59397	-1.50939	0.00105913	0.345918
43426	TC12000486.hg.1	chr12	+	56030644	56031638	OR10P1	olfactory receptor, family 10, subfamily P, member 1	0.377416	1.29901	0.00106941	0.345918
43522	TC12000589.hg.1	chr12	+	66460001	66460118	RNA5SP362	RNA, 5S ribosomal pseudogene 362	-0.36344	-1.28649	0.00114048	0.350152
62554	TC20000970.hg.1	chr20	-	55305453	55306516	OTTHUMG00000032807	NULL	0.347463	1.27232	0.00114681	0.350152
1180	TC01001204.hg.1	chr1	+	151170425	151222012	PIP5K1A	phosphatidylinositol-4-phosphate 5-kinase, type I, alpha	0.341776	1.26732	0.00116723	0.351276
63525	TC21000181.hg.1	chr21	+	41755010	41757285	DSCAM-AS1	DSCAM antisense RNA 1	-1.02626	-2.03673	0.00118199	0.351276
56089	TC17001078.hg.1	chr17	-	7126616	7126698	MIR324	microRNA 324	-0.449937	-1.36598	0.00120291	0.351276
915	TC01000931.hg.1	chr1	+	109102711	109187522	FAM102B	family with sequence similarity 102, member B	-0.67145	-1.59267	0.00120358	0.351276
59273	TC19000345.hg.1	chr19	+	17973397	17973529	SNORA68	small nucleolar RNA, H/ACA box 68	0.796123	1.73643	0.00122921	0.351276
7596	TC02001302.hg.1	chr2	+	219267369	219267445	MIR26B	microRNA 26b	-0.445929	-1.36219	0.00124191	0.351276
65005	TC22000627.hg.1	chr22	-	29190543	29196585	XBP1	X-box binding protein 1	-0.460288	-1.37582	0.00124599	0.351276
999	TC01001018.hg.1	chr1	+	116915004	116952883	ATP1A1	ATPase, Na+/K+ transporting, alpha 1 polypeptide	-0.33875	-1.26466	0.00135591	0.352524
2239	TC01002289.hg.1	chr1	-	17733251	17766250	RCC2	regulator of chromosome condensation 2	-0.347687	-1.27252	0.00136782	0.352524
39565	TC11000059.hg.1	chr11	+	2194293	2194368	MIR4686	microRNA 4686	-0.357054	-1.28081	0.00139976	0.352524
34993	TC0X001123.hg.1	chrX	-	70430035	70948962	BCYRN1	brain cytoplasmic RNA 1	0.365167	1.28803	0.00142682	0.352524
42917	TC11003472.hg.1	chr11	-	1773982	1785222	CTSD	cathepsin D	-0.365971	-1.28875	0.00148532	0.352524
128	TC01000128.hg.1	chr1	+	10359024	10359130	RNU6-37	RNA, U6 small nuclear 37	0.591494	1.50681	0.00149987	0.352524
8797	TC02002540.hg.1	chr2	-	175422694	175422800	RNU6-1	RNA, U6 small nuclear 1	0.591494	1.50681	0.00149987	0.352524
12247	TC03000967.hg.1	chr3	+	180949525	180949631	RNU6-1	RNA, U6 small nuclear 1	0.591494	1.50681	0.00149987	0.352524
26809	TC07001824.hg.1	chr7	-	123430659	123430765	RNU6-11	RNA, U6 small nuclear 11	0.591494	1.50681	0.00149987	0.352524
35302	TC0X001437.hg.1	chrX	-	140212215	140212321	RNU6-1	RNA, U6 small nuclear 1	0.591494	1.50681	0.00149987	0.352524
48117	TC14000206.hg.1	chr14	+	32671251	32671357	RNU6-1	RNA, U6 small nuclear 1	0.591494	1.50681	0.00149987	0.352524
48907	TC14001020.hg.1	chr14	-	32672369	32672475	RNU6-1	RNA, U6 small nuclear 1	0.591494	1.50681	0.00149987	0.352524
51756	TC15001590.hg.1	chr15	-	68132277	68132383	RNU6-1	RNA, U6 small nuclear 1	0.591494	1.50681	0.00149987	0.352524
58959	TC19000021.hg.1	chr19	+	893484	893590	RNU6-1	RNA, U6 small nuclear 1	0.591494	1.50681	0.00149987	0.352524
58964	TC19000026.hg.1	chr19	+	1021521	1021627	RNU6-1	RNA, U6 small nuclear 1	0.591494	1.50681	0.00149987	0.352524
25884	TC07000863.hg.1	chr7	+	137808504	137808567	MIR4468	microRNA 4468	-0.343371	-1.26872	0.0015407	0.352542
11649	TC03000357.hg.1	chr3	+	55521727	55522336	WNT5A-AS1	WNT5A antisense RNA 1	0.326477	1.25395	0.00154239	0.352542
55782	TC17000764.hg.1	chr17	+	61086898	61505067	TANC2	tetratricopeptide repeat, ankyrin repeat and coiled-coil containing 2	-0.368578	-1.29108	0.0015536	0.352542
36649	TC10000069.hg.1	chr10	+	8093504	8095047	OTTHUMG00000017642	NULL	-0.340013	-1.26577	0.00157431	0.35375
32301	TC09001357.hg.1	chr9	-	97365415	97402531	FBP1	fructose-1,6-bisphosphatase 1	-0.498941	-1.41318	0.00170083	0.366968
31472	TC09000504.hg.1	chr9	+	102067394	102068893	KRT8P11	---	-0.463741	-1.37911	0.00173335	0.366968
29189	TC08000823.hg.1	chr8	+	144624280	144624570	OTTHUMG00000165015	NULL	0.828771	1.77617	0.00179989	0.375168
65801	TC22001439.hg.1	chr22	+	22723982	22724454	IGLV7-46	immunoglobulin lambda variable 7-46 (gene/pseudogene)	-0.353961	-1.27806	0.00181439	0.375168
56806	TC17001816.hg.1	chr17	-	65467605	65467701	MIR548AA2	microRNA 548aa-2	-0.336896	-1.26304	0.00186655	0.37642
53163	TC16000194.hg.1	chr16	+	16326389	16388668	NOMO3	NODAL modulator 3	0.337551	1.26361	0.00187834	0.376474
53724	TC16000774.hg.1	chr16	-	2140196	2140285	MIR1225	microRNA 1225	0.446768	1.36298	0.00193867	0.383856
11620	TC03000327.hg.1	chr3	+	51989330	51991520	GPR62	G protein-coupled receptor 62	-0.402842	-1.32211	0.00198714	0.389214
46704	TC13000500.hg.1	chr13	-	26618735	26625198	SHISA2	shisa homolog 2 (Xenopus laevis)	-0.39967	-1.31921	0.00199823	0.389214
62113	TC20000518.hg.1	chr20	+	62152077	62153559	PPDPF	pancreatic progenitor cell differentiation and proliferation factor homolog (zebrafish)	0.479266	1.39403	0.00201461	0.389214
2015	TC01002058.hg.1	chr1	-	453633	460480	OTTHUMG00000002855	NULL	-0.358797	-1.28236	0.00203166	0.389214
53858	TC16000912.hg.1	chr16	-	18511182	18573533	NOMO2	NODAL modulator 2	0.33571	1.262	0.00203721	0.389214
54073	TC16001135.hg.1	chr16	-	56700647	56701977	MT1G	metallothionein 1G	0.465149	1.38046	0.00209275	0.39512
3613	TC01003692.hg.1	chr1	-	201452658	201478584	CSRP1	cysteine and glycine-rich protein 1	-0.357934	-1.28159	0.002136	0.39512
48606	TC14000711.hg.1	chr14	+	101459573	101459647	SNORD114-31	small nucleolar RNA, C/D box 114-31	-0.4664	-1.38166	0.0021772	0.39512
51367	TC15001193.hg.1	chr15	-	34633914	34635378	NOP10	NOP10 ribonucleoprotein	0.335626	1.26192	0.00220543	0.39512
54188	TC16001253.hg.1	chr16	-	71792305	71792390	SNORD71	small nucleolar RNA, C/D box 71	1.95431	3.87531	0.0022303	0.39512
33836	TC09002901.hg.1	chr9	+	91611421	91619925	S1PR3	sphingosine-1-phosphate receptor 3	-0.475696	-1.39059	0.00224144	0.39512
59886	TC19000981.hg.1	chr19	-	281044	291435	PPAP2C	phosphatidic acid phosphatase type 2C	-0.327524	-1.25486	0.00226983	0.39512
54161	TC16001225.hg.1	chr16	-	69743304	69760707	NQO1	NAD(P)H dehydrogenase, quinone 1	-0.51434	-1.42834	0.00227568	0.39512
48774	TC14000882.hg.1	chr14	-	20811207	20811844	RPPH1	ribonuclease P RNA component H1	0.382268	1.30339	0.00227658	0.39512
7067	TC02000762.hg.1	chr2	+	121103719	121109384	INHBB	inhibin, beta B	-0.413039	-1.33149	0.00230171	0.39512
11424	TC03000120.hg.1	chr3	+	22423436	22424420	HMGB1P5	high mobility group box 1 pseudogene 5	-0.403948	-1.32312	0.00231573	0.39512
16011	TC04001378.hg.1	chr4	-	89605999	89606105	RNU6-33P	RNA, U6 small nuclear 33, pseudogene	0.576986	1.49173	0.00231583	0.39512
54967	TC16002034.hg.1	chr16	+	56642111	56643409	MT2A	metallothionein 2A	0.739693	1.66982	0.00231722	0.39512
50097	TC14002240.hg.1	chr14	-	106380218	106380248	IGHD3-3	immunoglobulin heavy diversity 3-3	-0.518102	-1.43207	0.00236015	0.39512
7463	TC02001167.hg.1	chr2	+	201694732	201694839	RNU6-31P	RNA, U6 small nuclear 31, pseudogene	0.365181	1.28804	0.00236188	0.39512
22152	TC06001204.hg.1	chr6	+	171044839	171045633	OTTHUMG00000016090	NULL	-0.509214	-1.42327	0.00238558	0.39512
44743	TC12001837.hg.1	chr12	-	96051583	96184930	NTN4	netrin 4	-0.445126	-1.36143	0.00249424	0.400628
21620	TC06000659.hg.1	chr6	+	52860418	52860748	RN7SK	RNA, 7SK small nuclear	0.57833	1.49312	0.00250162	0.400628
31848	TC09000893.hg.1	chr9	-	5765076	5833117	ERMP1	endoplasmic reticulum metallopeptidase 1	-0.430482	-1.34768	0.00255534	0.407234
36267	TC0Y000046.hg.1	chrY	+	10037764	10037915	RNA5-8SP6	RNA, 5.8S ribosomal pseudogene 6	0.481278	1.39598	0.0025912	0.410945
43401	TC12000461.hg.1	chr12	+	54673977	54680872	HNRNPA1	heterogeneous nuclear ribonucleoprotein A1	-0.327114	-1.2545	0.0026539	0.416173
36728	TC10000148.hg.1	chr10	+	21610890	21610996	RNU6-15P	RNA, U6 small nuclear 15, pseudogene	0.626595	1.54392	0.00277657	0.420302
3128	TC01003193.hg.1	chr1	-	149856009	149858232	HIST2H2BE	histone cluster 2, H2be	0.796328	1.73668	0.00278658	0.420302
12167	TC03000886.hg.1	chr3	+	164059129	164059238	MIR720	microRNA 720	-0.339081	-1.26495	0.00280459	0.420302
48589	TC14000694.hg.1	chr14	+	101441143	101441217	SNORD114-17	small nucleolar RNA, C/D box 114-17	-0.38852	-1.30905	0.0028217	0.420936
40026	TC11000534.hg.1	chr11	+	61276068	61276129	MIR4488	microRNA 4488	0.429943	1.34718	0.00289118	0.42178
53149	TC16000180.hg.1	chr16	+	14927538	14990017	NOMO1	NODAL modulator 1	0.333992	1.2605	0.00293809	0.42178
40308	TC11000823.hg.1	chr11	+	76494283	76509198	TSKU	tsukushi, small leucine rich proteoglycan	-0.339483	-1.2653	0.00298386	0.42178
31881	TC09000926.hg.1	chr9	-	15776179	15776284	RNU6-14P	RNA, U6 small nuclear 14, pseudogene	0.37434	1.29625	0.0029952	0.42178
28742	TC08000366.hg.1	chr8	+	53106922	53112140	OTTHUMG00000164251	NULL	-0.374694	-1.29656	0.00315378	0.428086
8859	TC02002606.hg.1	chr2	-	188328957	188430487	TFPI	tissue factor pathway inhibitor (lipoprotein-associated coagulation inhibitor)	-0.363013	-1.28611	0.00318743	0.428086
47031	TC13000833.hg.1	chr13	-	100188573	100188650	RNY3P6	RNA, Ro-associated Y3 pseudogene 6	0.355629	1.27954	0.00319721	0.428086
11682	TC03000390.hg.1	chr3	+	63531116	63531211	RNA5SP134	RNA, 5S ribosomal pseudogene 134	0.382916	1.30397	0.00329252	0.431994
59104	TC19000171.hg.1	chr19	+	10220425	10220516	SNORD105B	small nucleolar RNA, C/D box 105B	1.13836	2.20131	0.00349144	0.450851
53364	TC16000401.hg.1	chr16	+	33961652	33961766	LINC00273	long intergenic non-protein coding RNA 273	-0.419635	-1.33759	0.00352168	0.451189
22806	TC06001881.hg.1	chr6	-	75962638	75994684	TMEM30A	transmembrane protein 30A	-0.41698	-1.33513	0.00375771	0.468352
43032	TC12000076.hg.1	chr12	+	6308881	6347437	CD9	CD9 molecule	-0.330213	-1.2572	0.00394171	0.473861
49177	TC14001296.hg.1	chr14	-	74178486	74181128	PNMA1	paraneoplastic Ma antigen 1	0.327537	1.25487	0.00396492	0.473861
34089	TC0X000197.hg.1	chrX	+	41152051	41152169	RNA5SP502	RNA, 5S ribosomal pseudogene 502	0.355019	1.279	0.00402524	0.473861
12363	TC03001083.hg.1	chr3	+	194935516	194935622	RNU6-7	RNA, U6 small nuclear 7	0.656575	1.57634	0.004061	0.473861
40072	TC11000580.hg.1	chr11	+	63737942	63738048	RNU6-45P	RNA, U6 small nuclear 45, pseudogene	0.472107	1.38713	0.00406741	0.473861
34888	TC0X001016.hg.1	chrX	-	48635380	48635486	RNU6-29	RNA, U6 small nuclear 29	0.646769	1.56566	0.00434315	0.481928
36191	TC0X002330.hg.1	chrX	-	48928818	48931733	PRAF2	PRA1 domain family, member 2	0.335153	1.26151	0.0044052	0.481928
38051	TC10001508.hg.1	chr10	-	91352500	91352586	MIR107	microRNA 107	-0.337435	-1.26351	0.00446358	0.481928
32003	TC09001056.hg.1	chr9	-	35657748	35658015	RMRP	RNA component of mitochondrial RNA processing endoribonuclease	1.48333	2.79592	0.00446408	0.481928
9105	TC02002862.hg.1	chr2	-	232325079	232325153	SNORD82	small nucleolar RNA, C/D box 82	0.611711	1.52807	0.00446967	0.481928
32098	TC09001152.hg.1	chr9	-	66458144	66458262	RNA5SP283	RNA, 5S ribosomal pseudogene 283	0.497352	1.41162	0.0047146	0.48284
29928	TC08001580.hg.1	chr8	-	124228028	124228103	MIR4663	microRNA 4663	-0.442404	-1.35887	0.00480175	0.483808
46377	TC13000170.hg.1	chr13	+	45634864	45635221	RN7SKP3	RNA, 7SK small nuclear pseudogene 3	0.340813	1.26647	0.00483875	0.483808
36654	TC10000074.hg.1	chr10	+	9012088	9015431	OTTHUMG00000017651	NULL	-0.554103	-1.46826	0.00487743	0.483808
18538	TC05000976.hg.1	chr5	+	174178737	174178790	MIR4634	microRNA 4634	0.334922	1.26131	0.00487866	0.483808
3632	TC01003711.hg.1	chr1	-	202909951	202927700	ADIPOR1	adiponectin receptor 1	0.322418	1.25042	0.0050437	0.489107
3126	TC01003191.hg.1	chr1	-	149821759	149822340	HIST2H2BC	histone cluster 2, H2bc (pseudogene)	0.346598	1.27156	0.00504527	0.489107
55888	TC17000871.hg.1	chr17	+	74333397	74333503	RNU6-24	RNA, U6 small nuclear 24	0.467369	1.38259	0.00516396	0.489221
375	TC01000382.hg.1	chr1	+	28835071	28835274	RNU105A	RNA, U105A small nucleolar	0.741606	1.67204	0.00516474	0.489221
25803	TC07000780.hg.1	chr7	+	128337764	128337798	RNA5SP243	RNA, 5S ribosomal pseudogene 243	1.21713	2.32484	0.00524867	0.489221
31648	TC09000687.hg.1	chr9	+	131104432	131105049	TMSB4XP4	thymosin beta 4, X-linked pseudogene 4	-1.01745	-2.02434	0.00537905	0.489221
53365	TC16000402.hg.1	chr16	+	33965426	33965577	RNA5-8SP2	RNA, 5.8S ribosomal pseudogene 2	0.518559	1.43252	0.00538775	0.489221
44945	TC12002040.hg.1	chr12	-	120730900	120731040	RNU4-1	RNA, U4 small nuclear 1	1.5959	3.02283	0.00548068	0.489221
59283	TC19000356.hg.1	chr19	+	18496968	18499986	GDF15	growth differentiation factor 15	0.575655	1.49035	0.00549052	0.489221
29449	TC08001096.hg.1	chr8	-	28906011	28906121	RNA5SP260	RNA, 5S ribosomal pseudogene 260	0.422413	1.34017	0.00555209	0.489221
32673	TC09001736.hg.1	chr9	-	139440625	139440711	MIR4674	microRNA 4674	0.408715	1.3275	0.00556538	0.489221
59632	TC19000717.hg.1	chr19	+	49468566	49470136	FTL	ferritin, light polypeptide	0.425465	1.34301	0.00558554	0.489221
16058	TC04001425.hg.1	chr4	-	101944566	102268637	PPP3CA	protein phosphatase 3, catalytic subunit, alpha isozyme	-0.343342	-1.26869	0.00572578	0.492266
34761	TC0X000887.hg.1	chrX	-	16893269	16893390	RNU4-6P	RNA, U4 small nuclear 6, pseudogene	0.420233	1.33814	0.006097	0.495486
28648	TC08000270.hg.1	chr8	+	36621963	36622069	RNA5SP264	RNA, 5S ribosomal pseudogene 264	0.401832	1.32118	0.0061961	0.495486
26971	TC07001994.hg.1	chr7	-	148684228	148684340	RNY1	RNA, Ro-associated Y1	0.888282	1.85097	0.00629016	0.495486
34319	TC0X000433.hg.1	chrX	+	80457303	80554046	SH3BGRL	SH3 domain binding glutamic acid-rich protein like	-0.361637	-1.28488	0.00653732	0.495486
15768	TC04001128.hg.1	chr4	-	39299225	39299331	RNU6-32	RNA, U6 small nuclear 32	0.65925	1.57926	0.00688384	0.495486
28765	TC08000390.hg.1	chr8	+	57829643	57829749	RNU6-13	RNA, U6 small nuclear 13	0.65925	1.57926	0.00688384	0.495486
29061	TC08000693.hg.1	chr8	+	119988752	119988858	RNU6-12	RNA, U6 small nuclear 12	0.65925	1.57926	0.00688384	0.495486
25548	TC07000507.hg.1	chr7	+	79400572	79400606	MIR548M	microRNA 548m	-0.854514	-1.80815	0.00693789	0.495486
36679	TC10000099.hg.1	chr10	+	13259269	13259375	RNU6-1	RNA, U6 small nuclear 1	0.704361	1.62942	0.00693831	0.495486
28637	TC08000259.hg.1	chr8	+	33370993	33371096	SNORD13	small nucleolar RNA, C/D box 13	1.25053	2.37928	0.00778333	0.510289
50096	TC14002235.hg.1	chr14	-	106373069	106373099	IGHD2-8	immunoglobulin heavy diversity 2-8	-0.403133	-1.32238	0.00807297	0.514185
50817	TC15000631.hg.1	chr15	+	69116303	69489862	MIR548H4	microRNA 548h-4	-0.600027	-1.51574	0.00812317	0.514185
32646	TC09001708.hg.1	chr9	-	137742123	137742202	MIR3689D2	microRNA 3689d-2	-0.397016	-1.31678	0.0083294	0.514185
55140	TC17000102.hg.1	chr17	+	7480129	7480276	SNORD10	small nucleolar RNA, C/D box 10	0.855502	1.80939	0.00835229	0.514185
43975	TC12001052.hg.1	chr12	+	132515769	132515905	SNORA49	small nucleolar RNA, H/ACA box 49	0.987178	1.9823	0.00850127	0.514185
32643	TC09001705.hg.1	chr9	-	137741144	137741215	MIR3689C	microRNA 3689c	-0.542814	-1.45681	0.00854898	0.514185
40091	TC11000600.hg.1	chr11	+	64136074	64136175	MIR1237	microRNA 1237	0.323931	1.25174	0.00858976	0.514185
2361	TC01002412.hg.1	chr1	-	27992572	27998729	IFI6	interferon, alpha-inducible protein 6	-0.336098	-1.26234	0.00905546	0.514185
15490	TC04000843.hg.1	chr4	+	169931581	169932090	OTTHUMG00000161027	NULL	0.378495	1.29999	0.00919166	0.514185
50792	TC15000606.hg.1	chr15	+	65822820	65870693	PTPLAD1	protein tyrosine phosphatase-like A domain containing 1	-0.355195	-1.27916	0.00921075	0.514185
8620	TC02002359.hg.1	chr2	-	133010727	133010878	RNA5-8SP5	RNA, 5.8S ribosomal pseudogene 5	0.431857	1.34897	0.00926982	0.514185
62464	TC20000878.hg.1	chr20	-	43953928	43977064	SDC4	syndecan 4	-0.367634	-1.29023	0.00953672	0.515589
21017	TC06000041.hg.1	chr6	+	4428197	4428315	RNA5SP202	RNA, 5S ribosomal pseudogene 202	0.354802	1.27881	0.00989049	0.520441
41491	TC11002038.hg.1	chr11	-	71145457	71159481	DHCR7	7-dehydrocholesterol reductase	-0.427554	-1.34495	0.010004	0.520556
13254	TC03002010.hg.1	chr3	-	172514219	172514348	RNU4-4P	RNA, U4 small nuclear 4, pseudogene	0.47927	1.39404	0.0100383	0.520556
43662	TC12000732.hg.1	chr12	+	95228174	95228804	MIR492	microRNA 492	-0.334274	-1.26074	0.0102372	0.521974
55525	TC17000498.hg.1	chr17	+	38530341	38530428	RNA5SP441	RNA, 5S ribosomal pseudogene 441	0.338808	1.26471	0.0103162	0.521974
1506	TC01001541.hg.1	chr1	+	178530048	178530164	RNA5SP69	RNA, 5S ribosomal pseudogene 69	0.359766	1.28322	0.010757	0.523061
55494	TC17000466.hg.1	chr17	+	36909002	36920483	PSMB3	proteasome (prosome, macropain) subunit, beta type, 3	0.346515	1.27149	0.0108231	0.523061
42944	TC11003499.hg.1	chr11	+	63742079	63744015	COX8A	cytochrome c oxidase subunit VIIIA (ubiquitous)	0.692903	1.61653	0.0109851	0.525454
58976	TC19000039.hg.1	chr19	+	1438363	1440493	RPS15	ribosomal protein S15	0.353755	1.27788	0.0111356	0.528239
6449	TC02000116.hg.1	chr2	+	20646835	20649206	RHOB	ras homolog family member B	-0.411132	-1.32973	0.0114746	0.528239
49144	TC14001262.hg.1	chr14	-	70233000	70234430	LOC100289511	uncharacterized LOC100289511	0.351005	1.27545	0.0114865	0.528239
7954	TC02001673.hg.1	chr2	-	27293340	27294641	OST4	oligosaccharyltransferase 4 homolog (S. cerevisiae)	0.332605	1.25928	0.0115917	0.528239
2836	TC01002896.hg.1	chr1	-	95708781	95729610	OTTHUMG00000010851	NULL	-0.472438	-1.38745	0.0116807	0.528239
46557	TC13000352.hg.1	chr13	+	99857962	99858260	RN7SKP9	RNA, 7SK small nuclear pseudogene 9	0.488461	1.40295	0.0119584	0.528239
59469	TC19000544.hg.1	chr19	+	39897487	39900047	ZFP36	ZFP36 ring finger protein	0.547183	1.46123	0.0121375	0.528239
25991	TC07000973.hg.1	chr7	+	148680847	148680948	RNY3	RNA, Ro-associated Y3	1.1503	2.2196	0.0124873	0.530506
56238	TC17001233.hg.1	chr17	-	19015734	19015949	SNORD3D	small nucleolar RNA, C/D box 3D	0.698985	1.62336	0.0126817	0.532383
58174	TC18000240.hg.1	chr18	+	66526171	66526277	RNU6-39P	RNA, U6 small nuclear 39, pseudogene	0.443428	1.35983	0.0127093	0.532383
56243	TC17001238.hg.1	chr17	-	19093343	19093558	SNORD3C	small nucleolar RNA, C/D box 3C	0.55182	1.46593	0.0136728	0.537478
48181	TC14000273.hg.1	chr14	+	50053297	50053598	RN7SL1	RNA, 7SL, cytoplasmic 1	0.9843	1.97835	0.0138876	0.537478
19066	TC05001521.hg.1	chr5	-	78466057	78466158	RNY3P1	RNA, Ro-associated Y3 pseudogene 1	1.22488	2.33736	0.0143391	0.537478
44944	TC12002039.hg.1	chr12	-	120729566	120729706	RNU4-2	RNA, U4 small nuclear 2	1.10238	2.14708	0.0151679	0.537478
62426	TC20000839.hg.1	chr20	-	37055949	37056086	SNORA71A	small nucleolar RNA, H/ACA box 71A	0.453477	1.36934	0.0155795	0.537478
13286	TC03002042.hg.1	chr3	-	179879674	179879765	RNA5SP149	RNA, 5S ribosomal pseudogene 149	1.23582	2.35515	0.0176315	0.549266
55139	TC17000101.hg.1	chr17	+	7478031	7478165	SNORA48	small nucleolar RNA, H/ACA box 48	0.791462	1.73083	0.0177682	0.549266
48887	TC14000999.hg.1	chr14	-	29896117	30174608	MIR548AI	microRNA 548ai	-0.980711	-1.97344	0.0192579	0.553389
40119	TC11000631.hg.1	chr11	+	65265233	65273940	MALAT1	metastasis associated lung adenocarcinoma transcript 1 (non-protein coding)	-0.586542	-1.50164	0.0199427	0.553411
12864	TC03001607.hg.1	chr3	-	99273153	99717059	MIR548G	microRNA 548g	-0.718192	-1.64512	0.0200474	0.553411
46157	TC12003257.hg.1	chr12	+	120875893	120878545	COX6A1	cytochrome c oxidase subunit VIa polypeptide 1	0.402915	1.32218	0.0216031	0.562295
41629	TC11002177.hg.1	chr11	-	88345973	88346079	RNU6-16P	RNA, U6 small nuclear 16, pseudogene	0.520099	1.43405	0.0244921	0.566652
23143	TC06002225.hg.1	chr6	-	150647759	150647899	RNU4-7P	RNA, U4 small nuclear 7, pseudogene	0.336006	1.26226	0.0246624	0.567622
67328	TCUn_gl000220000001.hg.1	chrUn_gl000220	+	97129	156152	RNA5-8S5	RNA, 5.8S ribosomal 5	0.366824	1.28951	0.0253028	0.571674
40293	TC11000808.hg.1	chr11	+	75115465	75115610	SNORD15B	small nucleolar RNA, C/D box 15B	0.842601	1.79328	0.0266323	0.580683
1855	TC01001896.hg.1	chr1	+	228743494	228743602	RNA5SP19	RNA, 5S ribosomal pseudogene 19	0.348091	1.27287	0.0271254	0.580683
34827	TC0X000953.hg.1	chrX	-	37883146	37883241	MIR548AJ2	microRNA 548aj-2	-0.36102	-1.28433	0.0278997	0.584356
60103	TC19001207.hg.1	chr19	-	12817263	12817332	SNORD41	small nucleolar RNA, C/D box 41	0.934956	1.91183	0.028054	0.584356
36398	TC0Y000182.hg.1	chrY	-	21152526	21154705	CD24	CD24 molecule	-0.373464	-1.29546	0.0281733	0.584356
29360	TC08001005.hg.1	chr8	-	14710947	14711019	MIR383	microRNA 383	-0.376308	-1.29802	0.0289364	0.588862
50089	TC14002215.hg.1	chr14	-	106330024	106330072	IGHJ5	immunoglobulin heavy joining 5	-0.418075	-1.33614	0.0308904	0.59188
3289	TC01003361.hg.1	chr1	-	157257493	157257843	OTTHUMG00000017483	NULL	-0.348369	-1.27312	0.0311171	0.59296
43686	TC12000757.hg.1	chr12	+	98115494	98115600	RNU6-36P	RNA, U6 small nuclear 36, pseudogene	0.636476	1.55453	0.031431	0.594455
12104	TC03000823.hg.1	chr3	+	150905886	150906010	RNA5SP145	RNA, 5S ribosomal pseudogene 145	0.343624	1.26894	0.032353	0.597315
55263	TC17000230.hg.1	chr17	+	19091329	19091544	SNORD3A	small nucleolar RNA, C/D box 3A	0.722165	1.64966	0.0323869	0.597315
35266	TC0X001400.hg.1	chrX	-	134184962	134186226	FAM127B	family with sequence similarity 127, member B	0.355793	1.27969	0.0326657	0.597315
64859	TC22000477.hg.1	chr22	-	18246946	18247025	MIR3198-1	microRNA 3198-1	-0.369424	-1.29184	0.0337127	0.601906
8617	TC02002356.hg.1	chr2	-	132722304	132737446	OTTHUMG00000150221	NULL	-0.353474	-1.27763	0.0346671	0.605314
47974	TC14000052.hg.1	chr14	+	20883146	20883257	RNA5SP382	RNA, 5S ribosomal pseudogene 382	0.33129	1.25814	0.0347972	0.605314
65890	TC6_apd_hap1000013.hg.1	chr6_apd_hap1	+	853540	853616	SNORD32B	small nucleolar RNA, C/D box 32B	-0.35355	-1.2777	0.0351933	0.606096
66017	TC6_cox_hap2000017.hg.1	chr6_cox_hap2	+	1068838	1068914	SNORD32B	small nucleolar RNA, C/D box 32B	-0.35355	-1.2777	0.0351933	0.606096
66256	TC6_dbb_hap3000013.hg.1	chr6_dbb_hap3	+	853386	853462	SNORD32B	small nucleolar RNA, C/D box 32B	-0.35355	-1.2777	0.0351933	0.606096
66482	TC6_mann_hap4000014.hg.1	chr6_mann_hap4	+	853056	853132	SNORD32B	small nucleolar RNA, C/D box 32B	-0.35355	-1.2777	0.0351933	0.606096
66679	TC6_mcf_hap5000012.hg.1	chr6_mcf_hap5	+	853232	853308	SNORD32B	small nucleolar RNA, C/D box 32B	-0.35355	-1.2777	0.0351933	0.606096
66892	TC6_qbl_hap6000012.hg.1	chr6_qbl_hap6	+	853360	853436	SNORD32B	small nucleolar RNA, C/D box 32B	-0.35355	-1.2777	0.0351933	0.606096
15857	TC04001218.hg.1	chr4	-	57197343	57197383	RNA5SP162	RNA, 5S ribosomal pseudogene 162	0.770074	1.70536	0.0354235	0.60698
3016	TC01003079.hg.1	chr1	-	143647014	143647177	RNU1-10P	RNA, U1 small nuclear 10, pseudogene	0.423816	1.34147	0.0373702	0.610712
55259	TC17000226.hg.1	chr17	+	18965225	18965440	SNORD3B-1	small nucleolar RNA, C/D box 3B-1	0.718072	1.64498	0.0406479	0.619667
56236	TC17001231.hg.1	chr17	-	18967234	18967449	SNORD3B-2	small nucleolar RNA, C/D box 3B-2	0.718072	1.64498	0.0406479	0.619667
22293	TC06001348.hg.1	chr6	-	26188938	26189304	HIST1H4D	histone cluster 1, H4d	-0.355088	-1.27906	0.0435413	0.625323
554	TC01000565.hg.1	chr1	+	45242162	45242265	SNORD46	small nucleolar RNA, C/D box 46	0.767168	1.70193	0.0456593	0.628097
50094	TC14002229.hg.1	chr14	-	106363815	106363845	IGHD2-15	immunoglobulin heavy diversity 2-15	-0.801573	-1.743	0.0474834	0.633694
14692	TC04000031.hg.1	chr4	+	1976363	1976487	SCARNA22	small Cajal body-specific RNA 22	0.32601	1.25354	0.0483027	0.633968

## Sheet: p300_shRNA1_DE Genes
	probes	logFC	AveExpr	t	P.Value	adj.P.Val	B	gene.names
1	16684080	3.77687	8.92965	43.0039	1.27389e-10	2.59125e-06	13.8034	IFI6
2	17059804	3.49857	8.76685	41.9793	1.53889e-10	2.59125e-06	13.697	CALCR
3	16677451	3.40783	6.66526	38.9561	2.76388e-10	2.59125e-06	13.3509	KCNK2
4	16981631	-3.95782	6.34323	-38.9378	2.77409e-10	2.59125e-06	13.3487	GLRA3
5	17119208	-3.86035	7.52963	-38.2983	3.15819e-10	2.59125e-06	13.2687	LINC01293
6	16862548	-5.023	7.7187	-38.169	3.24293e-10	2.59125e-06	13.2522	CEACAM5
7	16755958	-4.53867	8.70206	-36.9364	4.19329e-10	2.59125e-06	13.0897	ASCL1
8	17078870	3.06223	8.43335	36.8335	4.28589e-10	2.59125e-06	13.0757	MMP16
9	16992530	-3.95394	9.2922	-36.7641	4.34961e-10	2.59125e-06	13.0662
10	16773131	3.41004	8.36034	35.6653	5.51549e-10	2.95724e-06	12.9114	SGCG
11	17121988	-2.98257	8.0036	-34.5467	7.07722e-10	3.35723e-06	12.7446	NA
12	16907979	3.23646	8.2691	34.2833	7.51381e-10	3.35723e-06	12.7039	ABCA12
13	16855673	3.50805	8.6151	33.7863	8.42287e-10	3.47391e-06	12.6257	BCL2
14	16744205	-4.09524	6.74723	-33.2239	9.60414e-10	3.67818e-06	12.5346	ARHGAP20
15	16908897	3.10377	7.3945	32.2327	1.21697e-09	4.14876e-06	12.3674	EPHA4
16	16804449	6.53261	8.69778	32.1191	1.25103e-09	4.14876e-06	12.3477	LINC00052
17	17112149	3.97287	8.28209	31.8274	1.34348e-09	4.14876e-06	12.2965	XIST
18	16755465	2.95022	6.08223	31.6406	1.40672e-09	4.14876e-06	12.2633	RMST
19	16920585	-2.55241	9.32871	-31.4613	1.47058e-09	4.14876e-06	12.2311	BMP7
20	17020846	2.56634	8.54235	31.2501	1.55003e-09	4.14876e-06	12.1928	COL12A1
21	16852463	-2.45664	8.68146	-30.9356	1.67746e-09	4.14876e-06	12.1349	RAB27B
22	17070456	-3.00687	8.51511	-30.7015	1.78003e-09	4.14876e-06	12.0912	CA2
23	16773113	2.65545	8.95057	30.6363	1.8098e-09	4.14876e-06	12.0789	NA
24	16677556	2.63066	7.50798	30.5206	1.86408e-09	4.14876e-06	12.057	TGFB2
25	16767991	3.12065	6.42529	30.3761	1.93444e-09	4.14876e-06	12.0295	LIN7A
26	16734355	-2.37395	8.70067	-29.6777	2.31968e-09	4.78363e-06	11.8933	H19,MIR675
27	17012304	-2.59626	8.82233	-29.5302	2.41164e-09	4.78908e-06	11.8638	HEY2
28	17120346	4.37033	8.3127	28.893	2.85926e-09	5.47518e-06	11.7339	MALRD1
29	16678651	-2.41547	6.69702	-28.6253	3.07459e-09	5.68449e-06	11.6779	CAPN9
30	16881863	-3.43664	6.98473	-28.3366	3.32755e-09	5.9471e-06	11.6166	LINC01291
31	16947173	2.8568	6.61496	28.1068	3.54573e-09	5.96536e-06	11.567	MME
32	16702982	3.26281	5.87974	27.9199	3.73518e-09	5.96536e-06	11.5262	MALRD1
33	16762759	2.9701	7.56967	27.8911	3.76535e-09	5.96536e-06	11.5199	TMTC1
34	16912362	-3.01766	8.90269	-27.8407	3.81885e-09	5.96536e-06	11.5088	ID1
35	17020258	4.32549	6.40956	27.7711	3.89405e-09	5.96536e-06	11.4935	BMP5
36	17013520	-2.39576	7.44676	-27.5128	4.18839e-09	6.01894e-06	11.4359	SASH1
37	16967863	-2.72621	8.52431	-27.4136	4.30798e-09	6.01894e-06	11.4136	AREG
38	16983373	-2.46797	6.38387	-27.3677	4.36456e-09	6.01894e-06	11.4033	OTULINL
39	16948461	-2.87315	8.38588	-27.3463	4.39135e-09	6.01894e-06	11.3984	SOX2
40	16987773	-4.71986	5.94453	-27.2682	4.49032e-09	6.01894e-06	11.3807	LINC02163
41	16981099	2.3423	10.5986	26.9367	4.93936e-09	6.45936e-06	11.3045	NPY1R
42	17021092	2.32085	7.35638	26.5836	5.47423e-09	6.98837e-06	11.2218	TENT5A
43	16814584	-2.45634	7.92965	-26.2228	6.08904e-09	7.37932e-06	11.1355	CACNA1H
44	17121982	-2.92767	7.58075	-26.1995	6.13133e-09	7.37932e-06	11.1299
45	17000168	2.53776	7.77993	26.1657	6.19336e-09	7.37932e-06	11.1217	CXCL14
46	16690343	-2.13171	6.88056	-25.8935	6.71877e-09	7.79132e-06	11.0552	VAV3
47	16729693	-2.68322	6.88511	-25.8391	6.82978e-09	7.79132e-06	11.0417	CCDC83
48	16780133	-2.17893	8.54571	-25.6752	7.17656e-09	7.89374e-06	11.0011	SLITRK6
49	16702379	2.33491	8.21531	25.6581	7.214e-09	7.89374e-06	10.9968
50	16777794	2.07886	10.4766	25.5176	7.52907e-09	7.95925e-06	10.9615	UBL3
51	16942958	3.20059	6.45842	25.4576	7.66816e-09	7.95925e-06	10.9464	EPHA3
52	16675045	2.14407	7.90977	25.4359	7.71922e-09	7.95925e-06	10.9409	HMCN1
53	17031720	2.34992	8.03907	25.2383	8.20225e-09	7.996e-06	10.8906	CDSN
54	17034172	2.34992	8.03907	25.2383	8.20225e-09	7.996e-06	10.8906	CDSN
55	17036422	2.34992	8.03907	25.2383	8.20225e-09	7.996e-06	10.8906	CDSN
56	17121984	-2.99636	7.62783	-25.1799	8.35165e-09	7.99626e-06	10.8756
57	17106398	2.09431	10.8874	25.0981	8.56583e-09	8.05744e-06	10.8546	SLC6A14
58	16856350	-2.50052	9.10382	-24.7745	9.47575e-09	8.75967e-06	10.7702	CNN2
59	16837768	2.17768	8.59015	24.6389	9.88917e-09	8.98691e-06	10.7344	TMEM94
60	16914084	2.96921	7.76811	24.2606	1.11535e-08	9.96691e-06	10.6328	CCN5
61	16967853	-2.61403	7.89648	-23.8964	1.25452e-08	1.10268e-05	10.5329	AREG
62	16914585	-2.42355	9.94259	-23.6232	1.37178e-08	1.1863e-05	10.4565	NA
63	16880712	2.44279	7.71506	23.5327	1.41331e-08	1.18895e-05	10.4308	SLC1A4
64	16914469	-2.27258	9.11409	-23.4918	1.43255e-08	1.18895e-05	10.4192	SLC2A10
65	16958403	2.01873	8.40657	23.4732	1.44136e-08	1.18895e-05	10.4139	HEG1
66	17057460	2.2127	6.90237	23.419	1.46748e-08	1.19215e-05	10.3985	TBRG4,SNORA5A,SNORA5C
67	17122120	-2.75028	6.94353	-23.256	1.5493e-08	1.23146e-05	10.3517	LINC00665
68	16970118	4.32039	6.28287	23.232	1.56181e-08	1.23146e-05	10.3447	SYNPO2
69	17106357	-4.00911	6.66524	-23.052	1.65903e-08	1.25934e-05	10.2924	PLS3
70	16691459	2.8303	6.25922	23.0266	1.67328e-08	1.25934e-05	10.285	VTCN1
71	16972076	2.05062	6.14102	23.0001	1.68831e-08	1.25934e-05	10.2773	NPY5R
72	16847095	2.96013	7.55681	22.9391	1.72351e-08	1.25934e-05	10.2593	,RNF43
73	16734237	-2.94642	7.27828	-22.9154	1.73738e-08	1.25934e-05	10.2524	MUC5B-AS1
74	16804446	2.73376	5.73446	22.9142	1.73809e-08	1.25934e-05	10.252
75	17122122	-3.05331	8.12686	-22.7181	1.85805e-08	1.32831e-05	10.1939	LINC00665
76	16992537	-2.13755	6.23878	-22.0544	2.33863e-08	1.64987e-05	9.99173
77	16906308	3.54854	5.60829	21.8275	2.53393e-08	1.76444e-05	9.92065	TFPI
78	16863041	-1.73103	8.70809	-21.7084	2.64369e-08	1.81727e-05	9.88295	BCL3
79	17064810	-2.12473	8.07373	-21.4453	2.90575e-08	1.95018e-05	9.79863	SHH
80	16877968	-2.44939	6.53048	-21.4415	2.90979e-08	1.95018e-05	9.79738	DPYSL5
81	16986913	-1.85326	5.31662	-21.1544	3.23011e-08	2.1157e-05	9.70372	VCAN
82	16862563	-4.74237	7.31785	-21.1484	3.23721e-08	2.1157e-05	9.70174	CEACAM6
83	16955815	-3.60507	7.65966	-21.1023	3.29242e-08	2.1157e-05	9.68653	NA
84	16720601	-2.42382	7.64486	-21.0806	3.3187e-08	2.1157e-05	9.67937	MUC5B
85	17122488	2.20609	7.86176	21.0518	3.35406e-08	2.1157e-05	9.66982	CYTOR,,MIR4435-2HG
86	17018841	2.76032	7.39143	21.0141	3.40102e-08	2.12038e-05	9.65729	KCNK5
87	17095098	-1.66944	7.18618	-20.7988	3.68326e-08	2.26342e-05	9.58527	GNA14
88	17087109	2.51633	7.23663	20.7751	3.71597e-08	2.26342e-05	9.57727	MIR23B,MIR27B
89	16773125	3.10137	7.14615	20.7447	3.75835e-08	2.26342e-05	9.567	NA
90	16667999	-1.68012	7.96915	-20.6861	3.84153e-08	2.26342e-05	9.54715
91	16690424	-1.68012	7.96915	-20.6861	3.84153e-08	2.26342e-05	9.54715
92	16914588	-2.36962	7.07556	-20.6318	3.92052e-08	2.28485e-05	9.52868	NA
93	16970762	2.00518	8.84868	20.5603	4.02716e-08	2.32177e-05	9.5043	PCDH10
94	16972663	1.89507	8.72722	20.4002	4.27833e-08	2.44033e-05	9.44922	TENM3
95	16690638	1.70464	7.69467	20.3428	4.37271e-08	2.46791e-05	9.42932	GSTM3
96	16743009	2.24023	7.57951	20.2673	4.50022e-08	2.49219e-05	9.40306
97	17122656	1.64916	7.92078	20.2624	4.50869e-08	2.49219e-05	9.40135	CYTOR,MIR4435-2HG
98	16886174	2.17685	8.83323	20.201	4.61575e-08	2.52533e-05	9.37989	KYNU
99	16908197	-1.86471	10.2477	-20.1395	4.7259e-08	2.55732e-05	9.35829	IGFBP5
100	16984244	-1.82732	8.41892	-20.1156	4.7696e-08	2.55732e-05	9.34986	OSMR
101	16754729	2.04306	8.29516	20.0535	4.88493e-08	2.59322e-05	9.32795	ACSS3
102	16788296	-1.96905	8.32839	-19.9248	5.13424e-08	2.69885e-05	9.28223	EML1
103	16768270	1.72658	8.27327	19.8362	5.31421e-08	2.73713e-05	9.25053	KITLG
104	17062321	-1.89675	8.49626	-19.7859	5.41948e-08	2.73713e-05	9.23246	CADPS2
105	16962602	-1.95494	6.06469	-19.78	5.432e-08	2.73713e-05	9.23033	NA
106	16998059	1.9126	9.37089	19.7696	5.45416e-08	2.73713e-05	9.22658	ARRDC3
107	16851383	-1.57761	8.40391	-19.7658	5.46231e-08	2.73713e-05	9.2252	GATA6
108	16748565	1.88489	9.07782	19.7361	5.5262e-08	2.7435e-05	9.21447	FAM234B
109	16819082	1.79229	8.17322	19.6961	5.61353e-08	2.76129e-05	9.2	LPCAT2
110	16897834	1.69146	9.46712	19.4497	6.18695e-08	3.01569e-05	9.11001	EFEMP1
111	16666545	2.97381	6.52206	19.3506	6.43583e-08	3.08734e-05	9.07341	ADGRL2
112	16979917	2.3752	8.50152	19.3455	6.44911e-08	3.08734e-05	9.07149	SLC7A11
113	17094814	1.49635	8.40142	19.2501	6.69996e-08	3.17904e-05	9.03602	CEMIP2
114	16904410	-1.77197	7.64904	-19.1938	6.85328e-08	3.22313e-05	9.01495	FIGN
115	16973296	-2.01054	7.52567	-19.1663	6.92934e-08	3.22313e-05	9.00467	ZNF732
116	17066065	1.80113	10.8616	19.1507	6.97322e-08	3.22313e-05	8.99879	SLC7A2
117	17125282	2.36186	7.3928	19.0906	7.14453e-08	3.27409e-05	8.97615	PGM5P2,PGM5
118	17090296	1.78565	10.4003	18.963	7.52396e-08	3.41875e-05	8.92782	ASS1
119	16864553	1.74897	8.81831	18.8736	7.8033e-08	3.51588e-05	8.89371	EMC10
120	17080486	2.1924	6.57595	18.8017	8.03656e-08	3.5908e-05	8.8661	TNFRSF11B
121	16870200	2.10088	4.97584	18.5663	8.85681e-08	3.92459e-05	8.77479	BST2
122	16703036	1.53703	10.3123	18.4903	9.14147e-08	4.01753e-05	8.74499	PLXDC2
123	17078388	-2.87383	5.50518	-18.4365	9.34903e-08	4.07534e-05	8.72382	CASC9
124	16879067	1.65117	8.50214	18.3629	9.64183e-08	4.16908e-05	8.6947	CRIM1
125	16855358	-1.95969	4.81082	-18.3158	9.8343e-08	4.21828e-05	8.67602	CCDC68
126	17010782	2.81386	6.05002	18.2019	1.03187e-07	4.39094e-05	8.63052	HTR1E
127	17122116	-2.38096	7.61338	-18.1213	1.06773e-07	4.44066e-05	8.59814	LINC00665
128	17122118	-2.38096	7.61338	-18.1213	1.06773e-07	4.44066e-05	8.59814	LINC00665
129	16866946	-1.53633	9.50262	-18.1199	1.0684e-07	4.44066e-05	8.59755	TIMM13,LMNB2
130	16800450	1.50391	8.32527	18.0918	1.08124e-07	4.45947e-05	8.58621	B2M
131	16992534	-1.99797	7.10932	-18.0224	1.11372e-07	4.52963e-05	8.55811
132	16886961	1.48693	7.05229	18.0194	1.11515e-07	4.52963e-05	8.55689	SLC4A10
133	17078995	2.35763	6.3239	17.9978	1.1255e-07	4.53729e-05	8.54811
134	16995177	1.9361	9.64199	17.9623	1.14275e-07	4.5422e-05	8.53366	PRLR
135	17122114	-2.39192	6.40405	-17.9604	1.14366e-07	4.5422e-05	8.5329	LINC00665
136	17048190	-2.6412	6.51933	-17.9309	1.15822e-07	4.55857e-05	8.52086	CDK14
137	16903186	-1.83884	6.09007	-17.9178	1.16479e-07	4.55857e-05	8.51548	LRP1B
138	17016406	1.46187	8.16734	17.8378	1.20559e-07	4.68406e-05	8.4827	H4C8
139	16764817	-2.39759	7.55146	-17.7666	1.24327e-07	4.79572e-05	8.45335	KRT81
140	17121980	-2.50312	7.34397	-17.6846	1.28837e-07	4.93416e-05	8.41934
141	16712277	-1.40909	8.13516	-17.6681	1.29763e-07	4.93439e-05	8.41249	ST8SIA6
142	17113293	1.93051	5.75617	17.616	1.32748e-07	4.99025e-05	8.39075	ACSL4
143	16835356	1.34561	9.86898	17.61	1.33093e-07	4.99025e-05	8.38827	,CDK5RAP3
144	16913957	-1.41057	10.8927	-17.5431	1.37048e-07	5.10285e-05	8.36024	MYBL2
145	16720085	1.78391	8.77892	17.4872	1.40455e-07	5.16925e-05	8.33672	IFITM1
146	16812925	3.55478	5.04602	17.4593	1.4219e-07	5.16925e-05	8.32495
147	17121986	-2.76326	7.04923	-17.4579	1.42276e-07	5.16925e-05	8.32437
148	17121978	-2.50199	7.17821	-17.4268	1.44243e-07	5.16925e-05	8.3112
149	16690388	-1.39188	10.8383	-17.4257	1.44316e-07	5.16925e-05	8.31072	SLC25A24
150	16714581	1.83027	6.74709	17.4118	1.45199e-07	5.16925e-05	8.30486	SLC16A9
151	16717290	1.56493	7.71998	17.4002	1.45949e-07	5.16925e-05	8.29992	PYROXD2
152	16847771	1.75374	7.82203	17.391	1.46544e-07	5.16925e-05	8.29601	ERN1
153	16943548	-1.52153	8.76414	-17.3336	1.50314e-07	5.26756e-05	8.27162	ALCAM
154	16761811	-2.1018	6.23299	-17.2725	1.5445e-07	5.37735e-05	8.24553	ART4
155	16704865	-2.47655	7.23204	-17.2352	1.57039e-07	5.43224e-05	8.22954	MSMB
156	16761726	1.42366	7.3792	17.2168	1.58333e-07	5.44189e-05	8.22164	PLBD1
157	16966026	-1.55575	7.46881	-17.1367	1.64111e-07	5.60454e-05	8.18712	FAM114A1
158	17122500	1.75912	7.6207	17.0952	1.672e-07	5.67388e-05	8.16914	CYTOR,,MIR4435-2HG
159	17075973	-2.03745	6.75229	-17.0611	1.6978e-07	5.71554e-05	8.15437	DUSP4
160	16826586	1.58971	8.54155	17.0509	1.70559e-07	5.71554e-05	8.14995	IRX3
161	16920762	1.51071	6.89661	16.9955	1.74879e-07	5.82392e-05	8.1258	CTSZ
162	16875114	-1.99054	7.19266	-16.925	1.80556e-07	5.97583e-05	8.09493	ZNF888
163	16756649	2.00366	6.99673	16.9003	1.82589e-07	6.00606e-05	8.0841	ACACB
164	16688999	1.79073	6.05471	16.8844	1.83912e-07	6.01268e-05	8.07711	MCOLN2
165	16917061	-1.81273	6.95959	-16.856	1.86305e-07	6.05401e-05	8.0646	FERMT1
166	16707009	1.36741	8.42785	16.8234	1.89093e-07	6.08745e-05	8.05022	PAPSS2
167	17005223	-2.70573	6.05344	-16.8175	1.89605e-07	6.08745e-05	8.0476	ID4
168	16975333	-1.48291	10.0945	-16.7384	1.96589e-07	6.24488e-05	8.01254	SMIM14
169	16724178	-1.75843	7.85526	-16.7357	1.96838e-07	6.24488e-05	8.01131	SLC35C1
170	17124006	-1.38682	6.13049	-16.6734	2.02552e-07	6.38837e-05	7.98354	OSMR-AS1
171	17100201	-2.06216	9.02076	-16.639	2.05787e-07	6.45245e-05	7.96815	CLIC3
172	17059323	-1.47591	4.58918	-16.6136	2.0821e-07	6.49047e-05	7.95678	SEMA3A
173	16829085	1.52489	12.7784	16.588	2.10687e-07	6.52973e-05	7.94529	SLC7A5
174	16981824	1.83234	5.63725	16.5055	2.18911e-07	6.74559e-05	7.90804	NA
175	16728778	1.74413	8.52237	16.4773	2.21795e-07	6.77273e-05	7.8953	P2RY2
176	16998648	2.70254	4.75657	16.4723	2.22318e-07	6.77273e-05	7.89301
177	16685868	-1.47785	9.28665	-16.422	2.27586e-07	6.89406e-05	7.87019	CITED4
178	16848070	1.40055	9.95288	16.3483	2.35576e-07	7.09599e-05	7.83654	SLC16A6
179	16693474	-1.59139	7.96031	-16.3256	2.38102e-07	7.13201e-05	7.82614	S100A16
180	16950396	-2.7547	4.33733	-16.2218	2.50024e-07	7.44751e-05	7.77841
181	17122492	1.60101	7.54883	16.2075	2.51721e-07	7.45665e-05	7.77179	CYTOR,,MIR4435-2HG
182	17056896	1.24781	8.71228	16.1723	2.55954e-07	7.54039e-05	7.75548	VPS41
183	16768341	1.5439	10.5018	16.1148	2.63024e-07	7.70631e-05	7.72882	ATP2B1
184	16676183	1.56574	7.3322	16.0736	2.6824e-07	7.78072e-05	7.70958	ATP2B4
185	16718263	1.62522	5.85306	16.0718	2.68466e-07	7.78072e-05	7.70876	SORCS1
186	16912472	-1.52091	7.1212	-16.0603	2.69947e-07	7.78158e-05	7.70337	HCK
187	16977868	2.82722	7.9027	15.9944	2.78575e-07	7.98735e-05	7.67252	ABCG2
188	16793129	-1.58439	8.68274	-15.9742	2.81284e-07	8.02214e-05	7.66302	BMP4
189	16850923	-1.59993	11.0209	-15.9379	2.86238e-07	8.12023e-05	7.64589	RAB31
190	16894911	-1.6119	8.84032	-15.8458	2.9921e-07	8.44354e-05	7.60235	SDC1
191	16764724	-1.48606	9.71584	-15.8175	3.03338e-07	8.48067e-05	7.58887	SMAGP
192	16819325	1.42526	9.48143	15.8151	3.03689e-07	8.48067e-05	7.58773	HERPUD1
193	16994618	-1.64422	8.18058	-15.7965	3.06438e-07	8.51311e-05	7.57887	MYO10
194	17070082	1.33034	7.12667	15.7735	3.09874e-07	8.56418e-05	7.5679	GDAP1
195	16920047	-1.34059	10.9387	-15.7517	3.1317e-07	8.6109e-05	7.55748	PREX1
196	16998661	3.33838	4.51439	15.7314	3.1627e-07	8.65177e-05	7.54778	RNU6-334P
197	17122650	1.60928	7.42137	15.6692	3.26011e-07	8.85516e-05	7.5179	CYTOR,,MIR4435-2HG
198	16975310	-1.31087	11.9604	-15.645	3.29877e-07	8.85516e-05	7.50627	UGDH
199	16980096	1.24512	10.6207	15.6406	3.30588e-07	8.85516e-05	7.50415	TBC1D9
200	16859763	1.89732	10.1889	15.6159	3.34607e-07	8.85516e-05	7.49223	,IFI30
201	16690881	2.5081	5.70285	15.6152	3.3472e-07	8.85516e-05	7.4919	LINC01160
202	17010760	3.62699	5.94135	15.6129	3.35106e-07	8.85516e-05	7.49076	NT5E
203	17011302	1.53558	8.92227	15.6083	3.35861e-07	8.85516e-05	7.48854	CRYBG1
204	16751190	1.39969	7.15189	15.6019	3.36918e-07	8.85516e-05	7.48544	METTL7A
205	16837308	1.43871	8.97274	15.5577	3.44312e-07	9.00535e-05	7.46402	ARSG
206	17122652	1.41413	7.03951	15.535	3.48165e-07	9.06192e-05	7.45303	CYTOR,,MIR4435-2HG
207	16998532	1.41385	8.67291	15.5198	3.50777e-07	9.08581e-05	7.44564	ST8SIA4
208	17069816	1.36104	8.56206	15.4917	3.55677e-07	9.16843e-05	7.43194	SULF1
209	16787882	1.71964	6.50258	15.4708	3.59366e-07	9.2192e-05	7.42174	SERPINA5
210	16849576	1.71029	9.31459	15.4269	3.67258e-07	9.3768e-05	7.40025	LGALS3BP
211	16714725	-2.1743	6.53541	-15.4097	3.70396e-07	9.4121e-05	7.39184	TMEM26
212	17106183	1.42364	9.96976	15.365	3.78719e-07	9.57819e-05	7.36984	TMEM164
213	17069063	-1.96771	7.41499	-15.3534	3.809e-07	9.58812e-05	7.36416	LYN
214	16826692	1.3674	10.7157	15.3209	3.8712e-07	9.68541e-05	7.34811	AMFR
215	16745186	1.361	10.9178	15.3127	3.88706e-07	9.68541e-05	7.34406	HYOU1
216	16667914	1.82532	5.59744	15.3051	3.90184e-07	9.68541e-05	7.3403	LINC01661
217	16872982	-1.29557	9.25386	-15.2784	3.95417e-07	9.77009e-05	7.3271	LYPD3
218	17096728	-1.3513	5.8652	-15.2286	4.05412e-07	9.97109e-05	7.30234	ABCA1
219	17086048	-1.87603	7.33467	-15.2022	4.10811e-07	0.000100292	7.28921	GCNT1
220	16673191	1.24691	8.47658	15.1988	4.11515e-07	0.000100292	7.28752	PBX1
221	17061662	2.7723	6.05098	15.1442	4.22977e-07	0.000102619	7.26024	LAMB1
222	16817254	-1.42802	7.90778	-15.0033	4.54266e-07	0.000109433	7.18928	IL4R
223	16994002	-1.28858	10.7079	-14.9943	4.5635e-07	0.000109433	7.18473	LPCAT1
224	16920806	-1.36195	8.85032	-14.9907	4.57187e-07	0.000109433	7.1829	SYCP2
225	16962316	-1.49848	6.52021	-14.9495	4.6688e-07	0.000111257	7.16201	LIPH
226	16701106	-1.34875	9.07639	-14.8856	4.82391e-07	0.000112384	7.12945	CHML
227	16996433	1.47907	9.83645	14.8807	4.83605e-07	0.000112384	7.12694	PLK2
228	16979133	-1.64199	5.69969	-14.8798	4.83816e-07	0.000112384	7.1265	CAMK2D
229	17014846	1.347	7.56862	14.8791	4.83986e-07	0.000112384	7.12616	ERMARD
230	16983611	2.10541	4.99197	14.871	4.85996e-07	0.000112384	7.12202	PURPL
231	17083197	1.6721	7.44348	14.8699	4.86282e-07	0.000112384	7.12144	VLDLR
232	16690511	-1.25763	8.29719	-14.8688	4.86567e-07	0.000112384	7.12085	TAF13
233	16785379	-1.47105	7.56492	-14.8521	4.90736e-07	0.000112384	7.11234	HSPA2
234	16942425	-1.40781	6.33809	-14.8487	4.91608e-07	0.000112384	7.11057
235	17114272	1.89467	7.87652	14.8449	4.92572e-07	0.000112384	7.10862	GPC4
236	17122506	1.66373	8.92208	14.8246	4.97719e-07	0.000112829	7.09825	CYTOR,MIR4435-2HG,
237	16953944	1.40612	8.79483	14.8207	4.98733e-07	0.000112829	7.09622	LAMB2
238	16668111	-1.15437	11.0412	-14.8119	5.00978e-07	0.000112861	7.09174	ELAPOR1
239	16740037	-1.23593	6.90125	-14.7907	5.06488e-07	0.000113625	7.08082	MAP4K2
240	16669087	-1.57064	6.64468	-14.7741	5.10847e-07	0.000114125	7.07226	SLC22A15
241	16984287	-2.88544	6.4542	-14.7037	5.29792e-07	0.000117867	7.03589	PTGER4
242	17090320	1.82288	9.05238	14.6801	5.36295e-07	0.00011882	7.02369	NA
243	17106102	2.25731	5.72356	14.6564	5.42961e-07	0.000119802	7.01134	COL4A5
244	16946280	1.97578	7.82048	14.614	5.55063e-07	0.000121971	6.98928	CLSTN2
245	16957095	1.34915	10.5208	14.5542	5.72679e-07	0.000125328	6.95801	CD47
246	16816497	-1.16691	8.85199	-14.526	5.81194e-07	0.000126674	6.94322	VPS35L
247	16851191	-1.58176	6.92901	-14.494	5.91037e-07	0.000128298	6.92639	LDLRAD4
248	16766420	-1.23399	7.13778	-14.4821	5.9474e-07	0.000128411	6.92013	STAT6
249	17075553	1.37738	11.1543	14.477	5.96347e-07	0.000128411	6.91742	STC1
250	16900635	1.3512	9.13013	14.456	6.02961e-07	0.000129316	6.90636	SEMA4C
251	17122510	1.43207	8.7248	14.3992	6.21291e-07	0.000132716	6.87632	CYTOR,MIR4435-2HG,
252	16682333	1.82574	5.64127	14.3878	6.2506e-07	0.000132991	6.87025	MFAP2
253	17095423	-1.52625	7.32548	-14.3388	6.41491e-07	0.000135948	6.84419	GOLM1
254	17121276	1.55695	6.89185	14.3145	6.49839e-07	0.000136231	6.8312	GOLGA8R,GOLGA8Q,GOLGA8O,GOLGA8N
255	16816962	1.95761	6.66693	14.3022	6.54073e-07	0.000136231	6.82468	SCNN1G
256	17059826	1.87943	5.2629	14.2992	6.55131e-07	0.000136231	6.82305	MIR489
257	16848318	1.29609	8.71819	14.2933	6.57203e-07	0.000136231	6.81988	ABCA5
258	16849274	-1.16043	10.9254	-14.2914	6.57844e-07	0.000136231	6.8189	ST6GALNAC2
259	17102041	-1.20001	10.2868	-14.2888	6.58786e-07	0.000136231	6.81746	SMS
260	17112426	-1.50772	5.32431	-14.2835	6.60613e-07	0.000136231	6.81468	HMGN5
261	16796652	1.26371	8.94855	14.275	6.63634e-07	0.00013633	6.81009	DEGS2
262	16899476	-2.57562	7.82876	-14.2505	6.72352e-07	0.000137181	6.79696	NA
263	17125034	1.18659	8.6824	14.2385	6.76678e-07	0.000137181	6.79051	ASNS,,ASNSP1
264	17122508	1.62154	8.64034	14.2384	6.76715e-07	0.000137181	6.79046	CYTOR,MIR4435-2HG,
265	16687208	2.03426	5.35785	14.2348	6.78011e-07	0.000137181	6.78853	TUT4
266	17104893	-1.90474	5.27422	-14.2228	6.82366e-07	0.000137543	6.78209	PABPC1L2B
267	16708728	-1.2452	10.2048	-14.2144	6.85443e-07	0.000137646	6.77757	SFXN2
268	17016043	-1.11985	10.7043	-14.1661	7.03398e-07	0.000140724	6.75154	MBOAT1
269	16763060	-1.74375	7.47774	-14.1272	7.18256e-07	0.00014265	6.73049	SYT10
270	16676673	1.46999	6.41158	14.1183	7.21719e-07	0.00014265	6.72564	IL20
271	16860888	-1.43108	9.28767	-14.1161	7.22579e-07	0.00014265	6.72444	,FXYD3
272	16771571	-1.33292	9.86727	-14.1133	7.23664e-07	0.00014265	6.72293	NA
273	17022916	1.23973	8.55362	14.0809	7.364e-07	0.000144629	6.70535	FRK
274	17124274	-1.3336	10.5009	-14.069	7.41177e-07	0.000145035	6.69883	,SMS
275	16743432	1.62039	6.13882	14.0337	7.55445e-07	0.00014729	6.6796	SESN3
276	16765542	-2.1832	7.13287	-14.0119	7.64408e-07	0.000148497	6.66771	ZNF385A
277	17121122	-1.15145	8.98217	-13.9617	7.85535e-07	0.000152051	6.64019	DUXAP9,,DUXAP8
278	17028037	1.19361	9.46287	13.9001	8.12374e-07	0.00015668	6.60626	,SNHG32,SNORD52
279	16817630	1.5298	8.23223	13.8915	8.1618e-07	0.00015685	6.60153	QPRT
280	17082982	1.52741	6.45221	13.8568	8.31837e-07	0.000159288	6.58233	DOCK8
281	16669180	-1.14238	9.79311	-13.8479	8.35882e-07	0.000159493	6.57742	PTGFRN
282	17101517	-1.24368	9.89479	-13.8408	8.39168e-07	0.000159552	6.57346	PRPS2
283	16968122	1.37885	7.4557	13.8324	8.43042e-07	0.000159587	6.5688	FRAS1
284	17122660	1.43654	8.14076	13.8275	8.45306e-07	0.000159587	6.56609	CYTOR,MIR4435-2HG
285	17083319	1.27954	8.77859	13.8041	8.56247e-07	0.000161086	6.55308	JAK2
286	16744918	1.21463	6.61931	13.7806	8.6737e-07	0.000162013	6.54002	TMPRSS13
287	17080022	-1.75042	6.81388	-13.7785	8.68369e-07	0.000162013	6.53885	LRP12
288	16958201	1.2783	7.20646	13.7746	8.70241e-07	0.000162013	6.53667	ADCY5
289	17086386	1.93888	5.54047	13.7668	8.73996e-07	0.000162149	6.53231	NTRK2
290	17088957	-1.43398	8.16345	-13.76	8.77283e-07	0.000162198	6.52851	NA
291	16928680	-1.15562	9.74156	-13.7474	8.83398e-07	0.000162767	6.52148	CCDC117
292	16973578	-1.21016	8.84761	-13.7242	8.94773e-07	0.000164045	6.50853	SLBP
293	16675763	-2.01399	7.01119	-13.7208	8.96453e-07	0.000164045	6.50663	PKP1
294	17024746	-1.11895	9.72923	-13.6987	9.07479e-07	0.000164938	6.49424	ZBTB2
295	17122662	1.39523	8.19342	13.6898	9.11996e-07	0.000164938	6.48921	CYTOR,MIR4435-2HG
296	16863715	-1.89736	10.7933	-13.6807	9.16587e-07	0.000164938	6.48412	NA
297	16863719	-1.89736	10.7933	-13.6807	9.16587e-07	0.000164938	6.48412	NA
298	17028030	1.13272	9.43243	13.6775	9.18195e-07	0.000164938	6.48235	,SNHG32,SNORD52
299	17030188	1.16721	9.63532	13.6744	9.19789e-07	0.000164938	6.48059	HLA-A
300	17028021	1.10702	9.88672	13.5762	9.7145e-07	0.000173621	6.42518	,SNHG32,SNORD52
301	16920497	1.8111	5.92817	13.5624	9.78988e-07	0.000174387	6.41733	CYP24A1
302	16911338	-1.36803	8.22798	-13.5475	9.87159e-07	0.000174852	6.4089	PLCB4
303	16966008	-1.32143	8.54319	-13.5435	9.89341e-07	0.000174852	6.40665	KLF3
304	16968447	1.20398	6.75162	13.5378	9.92501e-07	0.000174852	6.40342	GPAT3
305	16689020	1.48885	5.92125	13.532	9.95783e-07	0.000174852	6.40006	MCOLN3
306	16911493	-1.76475	5.64354	-13.5282	9.97903e-07	0.000174852	6.39791	SPTLC3
307	17079530	1.21054	7.68443	13.5172	1.00406e-06	0.000175066	6.39166	COX6C
308	16794705	1.13857	10.0068	13.5143	1.00566e-06	0.000175066	6.39005	NPC2,MIR4709
309	16670377	1.08525	11.0878	13.4786	1.02601e-06	0.000177456	6.3697	H4C14,H4C15
310	16692626	1.08525	11.0878	13.4786	1.02601e-06	0.000177456	6.3697	H4C14,H4C15
311	16879500	-1.74098	6.95663	-13.4444	1.04597e-06	0.000180282	6.35011	PLEKHH2
312	16816978	1.33107	6.59154	13.4391	1.04907e-06	0.000180282	6.34711	SCNN1B
313	16686827	1.38142	5.69707	13.4246	1.05768e-06	0.000180787	6.3388	LINC01389
314	17089549	2.27181	7.23532	13.4229	1.05875e-06	0.000180787	6.33777	DNM1
315	17121440	-2.04534	6.55546	-13.4145	1.06375e-06	0.000180984	6.33298	PLA2G10,
316	16802903	-1.55771	7.76429	-13.406	1.06885e-06	0.000180984	6.32811	LOXL1
317	16861126	-1.4795	6.68552	-13.4041	1.07003e-06	0.000180984	6.32699	UPK1A
318	17035049	1.20394	10.5897	13.3946	1.07576e-06	0.000181381	6.32156	HLA-A
319	17124702	1.30194	6.83226	13.3556	1.09976e-06	0.000184847	6.29911	SEPTIN7P2
320	16862188	1.26001	9.40793	13.3225	1.12066e-06	0.00018777	6.27996	PLD3
321	17106438	-2.1355	5.54215	-13.3115	1.12764e-06	0.000188351	6.27363	DOCK11
322	16984689	1.3184	8.73777	13.277	1.15003e-06	0.000191132	6.25361	ITGA2
323	16707202	1.1806	7.12896	13.2697	1.1548e-06	0.000191132	6.24939	IFIT5
324	16675638	-1.91004	6.58908	-13.2695	1.15499e-06	0.000191132	6.24923	NR5A2
325	16894283	-1.16711	7.19977	-13.2015	1.20071e-06	0.000197684	6.20966	MBOAT2
326	16719025	1.71794	6.18775	13.1997	1.20195e-06	0.000197684	6.20861	FGFR2
327	16751269	1.25193	5.48236	13.1869	1.21082e-06	0.000198534	6.20111	NA
328	16764758	1.26043	9.85722	13.1748	1.21925e-06	0.000199132	6.19404	GALNT6
329	16990264	-1.01748	7.1502	-13.1606	1.22925e-06	0.000199132	6.1857	PCDHB4
330	16653931	1.52793	8.12559	13.1605	1.22933e-06	0.000199132	6.18564	NA
331	16654043	1.52793	8.12559	13.1605	1.22933e-06	0.000199132	6.18564	NA
332	16874512	-2.06188	8.78665	-13.1455	1.23998e-06	0.000200253	6.17684	NA
333	17125374	1.18804	8.26546	13.131	1.25031e-06	0.000200749	6.16837	GLIDR,
334	17078999	-1.38528	5.81355	-13.1307	1.25054e-06	0.000200749	6.16818	C8orf88
335	16669796	-1.30906	8.58988	-13.1113	1.26461e-06	0.000202402	6.15676	TXNIP
336	16900875	1.39938	7.95848	13.0939	1.27735e-06	0.000203679	6.14653	MGAT4A
337	17115271	1.52627	7.59844	13.0869	1.28257e-06	0.000203679	6.14237	L1CAM
338	17043727	-1.18876	7.56388	-13.085	1.28398e-06	0.000203679	6.14124	SCIN
339	16995802	1.7528	5.91485	13.0695	1.2955e-06	0.000204899	6.13213	PLCXD3
340	16883498	-1.60173	6.76722	-13.0621	1.30107e-06	0.000205176	6.12774	NPAS2
341	16980974	-1.63091	6.83992	-13.0539	1.30724e-06	0.000205543	6.12291	GASK1B
342	16856249	-1.0598	7.41494	-13.0463	1.313e-06	0.00020575	6.11842	MISP
343	17058176	1.13828	10.1648	13.0417	1.31648e-06	0.00020575	6.11572	GUSB
344	16850797	-1.09021	9.40069	-13.0371	1.32006e-06	0.00020575	6.11294	RAB12
345	16941809	1.15757	6.71118	13.0316	1.32422e-06	0.0002058	6.10972	CACNA1D
346	16805422	-1.25465	9.04829	-13.011	1.34019e-06	0.00020768	6.09748	NR2F2
347	16687487	1.06897	9.42727	12.9979	1.35037e-06	0.000208653	6.08975	TMEM59
348	16777571	1.48845	7.6647	12.9758	1.3679e-06	0.000210755	6.07656	SHISA2
349	17014562	-1.10345	7.08926	-12.9212	1.41215e-06	0.000216949	6.04399	QKI
350	16793877	-1.5107	5.81695	-12.9078	1.42324e-06	0.000217459	6.03599	GPX2
351	16724346	1.15397	10.3254	12.9063	1.42447e-06	0.000217459	6.03511	DGKZ,MDK
352	17039217	1.12297	7.04165	12.9025	1.42763e-06	0.000217459	6.03284	CDSN
353	16764092	1.59315	7.30316	12.8552	1.46782e-06	0.000222564	6.00442	NA
354	16937137	1.28758	7.53997	12.8533	1.46946e-06	0.000222564	6.00328	LMCD1
355	17122486	1.35108	6.93473	12.8409	1.48015e-06	0.000223552	5.99586	CYTOR,MIR4435-2HG
356	16991010	2.6721	6.92277	12.8236	1.49532e-06	0.00022521	5.98541	SLC26A2
357	16886656	1.35367	6.86932	12.8083	1.50885e-06	0.000226611	5.97618	KCNJ3
358	16854594	-1.28182	7.91877	-12.7938	1.5218e-06	0.000227917	5.96743	GAREM1
359	16960844	1.892	6.29191	12.7794	1.53474e-06	0.000228892	5.95875	VEPH1
360	16729290	1.4508	9.54771	12.7771	1.53684e-06	0.000228892	5.95735	TSKU
361	16708192	-1.19505	6.61936	-12.7211	1.58859e-06	0.000235943	5.92339	ABCC2
362	16798744	1.13559	6.90927	12.7138	1.59551e-06	0.000236315	5.91894	GOLGA8R,GOLGA8Q,GOLGA8O,GOLGA8N
363	17117463	2.37278	7.05715	12.7084	1.60065e-06	0.000236425	5.91563	PLXDC2
364	16659102	1.02189	8.33538	12.6983	1.61027e-06	0.000236885	5.90949	CLCN6
365	17047560	-1.59132	8.20848	-12.6958	1.61261e-06	0.000236885	5.908	UPK3B
366	16905238	2.92851	5.89352	12.6846	1.62343e-06	0.000237824	5.90114	NA
367	17125702	1.53356	8.78592	12.6592	1.64811e-06	0.000240782	5.88565	SLC6A14,SLC6A14P1
368	16929442	1.31869	8.86482	12.615	1.6921e-06	0.000246537	5.85861	TIMP3
369	16998642	2.52039	6.36901	12.6055	1.70172e-06	0.000247266	5.85279
370	17094656	1.91952	6.74458	12.5724	1.7358e-06	0.000251536	5.83242	NA
371	16913263	-1.1281	8.27148	-12.5559	1.75302e-06	0.000253348	5.82227	EPB41L1
372	16688937	1.16419	8.47551	12.5026	1.81018e-06	0.000260905	5.78929	CTBS
373	17002304	1.34713	7.10445	12.4795	1.83556e-06	0.000263853	5.77497	RNF145
374	17122474	1.97567	5.8532	12.4708	1.84519e-06	0.000264528	5.76959	CYTOR,,MIR4435-2HG
375	16735557	-1.13445	10.6453	-12.449	1.86963e-06	0.000266829	5.75605	SCUBE2
376	17063005	1.54052	6.52975	12.4476	1.87119e-06	0.000266829	5.75519	PLXNA4
377	16836375	1.07751	9.54451	12.4378	1.88229e-06	0.000267129	5.74911	MSI2
378	17114139	1.16858	7.03607	12.4369	1.88336e-06	0.000267129	5.74852	IGSF1
379	16985440	1.15067	7.96746	12.4326	1.88824e-06	0.000267129	5.74586	MAST4
380	17110040	-1.32964	5.54428	-12.4024	1.92309e-06	0.000271343	5.72703	TMEM47
381	16860418	-1.30943	8.00935	-12.3823	1.94673e-06	0.000273958	5.71445	CCNE1
382	16690019	2.93489	5.60678	12.3755	1.9548e-06	0.000274373	5.7102	PLPPR5
383	17009093	1.10791	8.07412	12.3634	1.96922e-06	0.000275291	5.70263	VEGFA
384	17005515	1.09649	7.20667	12.3614	1.97161e-06	0.000275291	5.70138	TRIM38
385	16834603	1.28498	6.95723	12.3434	1.99343e-06	0.000276808	5.69004	TMEM106A
386	16668997	-2.30617	6.69244	-12.3403	1.99721e-06	0.000276808	5.68809	HIPK1,OLFML3
387	16902945	1.09834	6.41897	12.3396	1.99796e-06	0.000276808	5.6877	NCKAP5
388	16757636	-0.982026	8.23227	-12.3216	2.02007e-06	0.000279149	5.67636	RNFT2
389	17051376	-1.23664	6.97773	-12.286	2.06444e-06	0.000284547	5.65397	TSPAN33
390	16662636	-2.24807	6.54579	-12.2727	2.08134e-06	0.000285403	5.64556	DNALI1
391	16717986	-1.07115	10.2611	-12.2722	2.08199e-06	0.000285403	5.64524	NT5C2
392	17121134	-0.989443	8.62684	-12.2686	2.08662e-06	0.000285403	5.64295	DUXAP8
393	16752244	-1.10286	7.64437	-12.2563	2.1024e-06	0.000285924	5.63518	DGKA
394	17028041	1.032	11.3974	12.2555	2.10341e-06	0.000285924	5.63468	,SNHG32
395	16691436	-1.838	6.94303	-12.2511	2.10907e-06	0.000285924	5.63191
396	17071577	1.13485	7.04233	12.2488	2.11214e-06	0.000285924	5.63041
397	16895179	1.27491	7.13416	12.2407	2.12257e-06	0.000285924	5.62533	TP53I3
398	17121124	-1.07522	8.7337	-12.2393	2.1245e-06	0.000285924	5.62439	DUXAP9,,DUXAP8
399	16690704	1.96006	5.58016	12.2348	2.13028e-06	0.000285924	5.62159	SLC16A4
400	16804228	1.49908	7.1413	12.232	2.13396e-06	0.000285924	5.61981	SCAND2P
401	16811437	1.01374	9.60636	12.2286	2.13842e-06	0.000285924	5.61766	HEXA
402	17126034	1.29748	6.70727	12.2105	2.16245e-06	0.000287703	5.60613	NA
403	17126144	1.29748	6.70727	12.2105	2.16245e-06	0.000287703	5.60613	NA
404	16669067	-0.998139	9.3386	-12.1978	2.17934e-06	0.000289232	5.5981	VANGL1
405	17056861	-1.93968	6.39058	-12.1913	2.18814e-06	0.000289683	5.59394	AMPH
406	17121860	1.35337	5.04219	12.181	2.20208e-06	0.000290611	5.58739
407	16847164	1.55651	6.75916	12.1719	2.21442e-06	0.000290611	5.58162	TEX14
408	16665621	1.38392	6.3466	12.1692	2.21813e-06	0.000290611	5.57989	CACHD1
409	17121126	-0.996757	8.34495	-12.1686	2.21899e-06	0.000290611	5.57949	DUXAP9,,DUXAP8
410	16980364	-1.48178	5.63876	-12.1654	2.22338e-06	0.000290611	5.57745	ZNF827
411	17070120	1.36672	5.73471	12.1623	2.22767e-06	0.000290611	5.57546	CRISPLD1
412	16871359	1.05019	7.45116	12.1466	2.24937e-06	0.00029264	5.56545	DMKN
413	16706499	-0.991032	9.9777	-12.1431	2.25414e-06	0.00029264	5.56326	PPIF
414	16958356	1.18071	9.26834	12.1183	2.2891e-06	0.00029589	5.54737	ITGB5
415	16722162	-1.1546	9.09847	-12.1175	2.29021e-06	0.00029589	5.54687	PARVA
416	16771132	-1.00112	8.89948	-12.106	2.30654e-06	0.000297283	5.53953	RAB35
417	16967513	-1.88169	4.82085	-12.0568	2.37816e-06	0.000305779	5.50793	AMTN
418	17123112	-1.07942	8.46017	-12.0404	2.40268e-06	0.000308192	5.49733	DUXAP8
419	16943452	1.71142	7.53277	12.0266	2.42339e-06	0.000310108	5.48845	NXPE3
420	16877225	1.18376	7.23713	12.0204	2.43276e-06	0.000310528	5.48446	LPIN1
421	16703563	0.993825	10.5064	12.0168	2.43827e-06	0.000310528	5.48213	BAMBI
422	16911283	0.977033	8.84497	12.0023	2.46046e-06	0.000312042	5.47276	PLCB1
423	16990862	1.06172	5.83868	11.9987	2.46589e-06	0.000312042	5.47047	ABLIM3
424	16858519	-1.60411	4.60698	-11.9976	2.46761e-06	0.000312042	5.46975	ZNF441
425	17108546	-0.9417	9.90831	-11.9774	2.4991e-06	0.00031528	5.45664	BRCC3
426	16792456	-2.00145	4.48791	-11.9403	2.55785e-06	0.000321935	5.43259	LINC00648
427	16772074	-0.988597	8.69596	-11.8862	2.64637e-06	0.000332297	5.39737	NCOR2
428	17088652	-0.989821	7.201	-11.878	2.66025e-06	0.000333259	5.39195	GSN
429	16805474	-1.21929	7.49455	-11.8559	2.69759e-06	0.000337148	5.37751	ARRDC4
430	16875014	0.911707	9.13174	11.8481	2.7109e-06	0.000338024	5.37241	ZNF841
431	16998810	1.35869	7.18221	11.8363	2.73119e-06	0.000339763	5.36469	STARD4
432	17087107	1.35208	7.45351	11.8217	2.7565e-06	0.000342119	5.35513	MIR23B,MIR27B
433	16835672	1.15276	8.78539	11.8146	2.7691e-06	0.000342889	5.3504	ITGA3
434	17108428	0.984596	8.35591	11.8085	2.77968e-06	0.000343406	5.34645	PLXNA3
435	17006895	0.965568	9.41759	11.7923	2.80845e-06	0.000343673	5.33577	,SNHG32
436	17026337	0.965568	9.41759	11.7923	2.80845e-06	0.000343673	5.33577	,SNHG32
437	17038315	0.965568	9.41759	11.7923	2.80845e-06	0.000343673	5.33577	,SNHG32
438	17122504	1.72351	8.66903	11.7897	2.81306e-06	0.000343673	5.33408	CYTOR,,MIR4435-2HG
439	16998551	1.91029	8.76896	11.7871	2.81778e-06	0.000343673	5.33234	SLCO4C1
440	16751993	1.23669	9.79195	11.7857	2.8203e-06	0.000343673	5.33141	NA
441	16894402	1.02238	9.74065	11.7781	2.83397e-06	0.000344555	5.3264	ODC1
442	17103951	1.00838	8.08989	11.7705	2.8476e-06	0.00034543	5.32142	TSPYL2
443	16791898	-1.88402	6.67836	-11.7629	2.86145e-06	0.000346326	5.31639	CFL2
444	17087057	1.48457	7.13491	11.7551	2.87571e-06	0.000347268	5.31123	NA
445	16824109	-2.50077	6.96024	-11.7423	2.89936e-06	0.000348746	5.30274	PLA2G10
446	16780456	-0.925175	7.4748	-11.7414	2.90096e-06	0.000348746	5.30217	STK24
447	16827041	2.16471	6.56141	11.7242	2.93295e-06	0.000351803	5.29079	CDH11
448	16883776	-0.954912	8.64097	-11.7104	2.95888e-06	0.000353979	5.28166	SLC9A2
449	16752016	1.52521	9.86809	11.7042	2.97065e-06	0.000353979	5.27754	NA
450	16687737	1.40689	6.9382	11.7041	2.97089e-06	0.000353979	5.27745	PLPP3
451	17093090	1.14057	7.10394	11.6986	2.98126e-06	0.000354426	5.27384	DDX58
452	17108605	-1.00631	9.87318	-11.684	3.00928e-06	0.000356702	5.26413	VAMP7
453	16730471	-1.1784	5.70818	-11.6817	3.01371e-06	0.000356702	5.2626	CEP126
454	16810177	0.980364	8.16739	11.6523	3.07105e-06	0.000362468	5.24304	VPS13C
455	16819430	-1.12601	8.8659	-11.6499	3.07595e-06	0.000362468	5.24138	CPNE2
456	17070705	0.964608	6.99629	11.6295	3.11643e-06	0.000366433	5.2278
457	17020152	0.993653	8.88352	11.6082	3.15946e-06	0.00037068	5.21356	ELOVL5
458	16907863	-1.06929	7.97444	-11.5885	3.19987e-06	0.000374601	5.20035	ERBB4
459	16874273	-1.18768	9.05792	-11.5793	3.2188e-06	0.000375997	5.19422	TEAD2
460	16819926	1.92046	5.63707	11.5658	3.24703e-06	0.00037847	5.18515	CES4A
461	16937050	1.01795	8.67848	11.5589	3.26169e-06	0.000379353	5.18047	EDEM1
462	17110289	2.3855	5.2212	11.5491	3.28228e-06	0.000380806	5.17393	MAOB
463	16965915	-1.35693	6.7457	-11.5463	3.28838e-06	0.000380806	5.172	C4orf19
464	16811762	0.968871	8.22643	11.533	3.31685e-06	0.000382111	5.16304	MAN2C1
465	17111874	-1.1076	7.94786	-11.5278	3.32799e-06	0.000382111	5.15955	SNX12
466	16692577	-1.6526	7.42687	-11.5266	3.33055e-06	0.000382111	5.15875	H2BP2
467	16912597	-1.28428	7.55294	-11.5249	3.33424e-06	0.000382111	5.1576	DNMT3B
468	17122658	1.45509	7.40893	11.5244	3.33528e-06	0.000382111	5.15728	CYTOR,MIR4435-2HG
469	16836655	1.13943	7.72059	11.5192	3.34656e-06	0.000382585	5.15377	CA4
470	16814915	-1.18874	9.91879	-11.5032	3.38142e-06	0.00038541	5.14299	SLC9A3R2
471	16777278	-1.09094	9.79408	-11.4968	3.39557e-06	0.00038541	5.13865	SKA3
472	17098027	0.978727	10.1954	11.496	3.39726e-06	0.00038541	5.13813	STOM
473	16857258	-0.924532	8.98156	-11.4948	3.40002e-06	0.00038541	5.13728	UHRF1
474	16964027	-1.60287	7.17005	-11.4599	3.47802e-06	0.000392617	5.11369	FGFR3
475	16834015	-1.13744	8.12172	-11.4598	3.47824e-06	0.000392617	5.11362	RAPGEFL1
476	16755527	1.05228	7.83007	11.4547	3.48982e-06	0.000393096	5.11016	NA
477	16903991	1.39694	4.99621	11.4415	3.52005e-06	0.000395669	5.10119	CCDC148
478	17077525	-1.10374	7.01007	-11.4258	3.55626e-06	0.00039742	5.09054	CA8
479	16988871	-1.10928	4.4768	-11.4255	3.55717e-06	0.00039742	5.09027	NA
480	16801862	1.11321	6.88226	11.4252	3.55785e-06	0.00039742	5.09007	APH1B
481	17120266	-0.994645	6.9195	-11.4177	3.5752e-06	0.000398527	5.08501	SLC25A24P1
482	16986249	0.90885	10.5821	11.4075	3.59911e-06	0.000400171	5.07807	HMGCR
483	16961039	-1.06761	8.34038	-11.4018	3.6126e-06	0.000400171	5.07417	B3GALNT1
484	16741142	1.14006	8.86859	11.3996	3.61777e-06	0.000400171	5.07268	ALDH3B2
485	17057354	1.09812	8.96838	11.3988	3.6198e-06	0.000400171	5.0721	TMED4
486	17117871	-1.10353	9.53136	-11.3937	3.63192e-06	0.000400684	5.06862	HMGA1P8,HMGA1
487	16875297	0.983587	8.31281	11.3725	3.68272e-06	0.000405455	5.05416	TMC4,
488	16999245	0.946277	9.3887	11.3683	3.69294e-06	0.000405746	5.05127	PPIC
489	16897872	-2.73893	6.44801	-11.3623	3.70751e-06	0.000406514	5.04717
490	16732584	1.3651	5.97403	11.3558	3.72336e-06	0.000407419	5.04273	SORL1
491	17106415	1.0161	8.84497	11.3331	3.77923e-06	0.000412473	5.02721	WDR44
492	17030840	0.975291	9.42198	11.3308	3.78493e-06	0.000412473	5.02564	,SNHG32
493	17032882	0.938258	7.53765	11.325	3.79949e-06	0.000413219	5.02164	HLA-A
494	17010544	-1.00271	8.1575	-11.3115	3.83358e-06	0.00041543	5.01233	SH3BGRL2
495	16863307	-1.05865	9.77182	-11.3108	3.83531e-06	0.00041543	5.01186	VASP
496	16661192	1.37605	7.77294	11.2915	3.88439e-06	0.000419898	4.99861	DHDDS,HMGN2
497	16988874	0.907599	9.32426	11.2869	3.89615e-06	0.000420321	4.99546	ADAMTS19
498	17087206	-0.991112	6.10324	-11.2802	3.9135e-06	0.000420682	4.99083
499	17015862	-1.23879	8.01469	-11.2777	3.92007e-06	0.000420682	4.98908	ATXN1
500	16713187	0.963665	9.44012	11.273	3.93214e-06	0.000420682	4.98587	NRP1
501	16697018	1.25354	7.47563	11.2704	3.93884e-06	0.000420682	4.9841	RGS16
502	16669944	1.41947	7.00541	11.2689	3.94283e-06	0.000420682	4.98304	PDZK1
503	16962850	0.963464	5.73637	11.2658	3.95082e-06	0.000420682	4.98093	NA
504	17111725	1.35175	7.62195	11.2645	3.95441e-06	0.000420682	4.97998	EDA2R
505	16689354	1.59823	5.53811	11.2302	4.04518e-06	0.000429486	4.95632	GBP2
506	16783739	1.68848	5.00048	11.2233	4.06378e-06	0.000430608	4.95153	LRFN5
507	16851486	1.22793	6.87139	11.2132	4.09131e-06	0.00043267	4.94449	LAMA3
508	17055182	0.938708	4.99537	11.1915	4.1507e-06	0.000438087	4.92945	NA
509	17107676	-0.915241	7.3437	-11.1871	4.16275e-06	0.000438496	4.92643	MAMLD1
510	17122642	1.11565	5.94946	11.1666	4.22009e-06	0.000442045	4.91215	MIR4435-2HG
511	17013195	1.78987	7.98553	11.1662	4.22118e-06	0.000442045	4.91188	RNA5SP221
512	17119472	1.78987	7.98553	11.1662	4.22118e-06	0.000442045	4.91188	RNA5SP221
513	16795368	1.17425	6.46002	11.1451	4.2812e-06	0.00044627	4.89715	STON2
514	17054660	-1.16842	4.52158	-11.1441	4.28388e-06	0.00044627	4.89649
515	16768948	1.04349	5.77954	11.1432	4.2865e-06	0.00044627	4.89586	ANKS1B
516	16981730	-1.3609	6.27872	-11.1246	4.34017e-06	0.000450305	4.88286	VEGFC
517	16909165	0.906655	9.23787	11.124	4.34205e-06	0.000450305	4.88241	IRS1
518	16654001	1.73207	4.42167	11.12	4.35355e-06	0.000450626	4.87965	NA
519	17070485	-2.68413	4.60213	-11.1111	4.37954e-06	0.000452443	4.87343
520	16830041	1.2706	8.03856	11.1059	4.39486e-06	0.000453152	4.86979	ZFP3
521	16847933	-1.39678	6.56866	-11.0805	4.47045e-06	0.000460061	4.85198	AXIN2,
522	17089147	-0.902167	7.53209	-11.0717	4.49685e-06	0.000461709	4.84583	MVB12B
523	17045674	0.937301	9.88783	11.0695	4.50368e-06	0.000461709	4.84424	OGDH
524	16825997	1.52156	7.89286	11.0652	4.51655e-06	0.000462145	4.84126	PYCARD
525	16653921	1.55778	9.56154	11.0332	4.6149e-06	0.000470413	4.81875	NA
526	16654033	1.55778	9.56154	11.0332	4.6149e-06	0.000470413	4.81875	NA
527	16847199	0.943697	7.3636	11.0124	4.68016e-06	0.00047616	4.80407
528	16817017	-0.868533	11.421	-11.0024	4.71194e-06	0.000478244	4.797	DCTN5,PLK1
529	16769569	-1.24059	6.97561	-11.0004	4.71848e-06	0.000478244	4.79555	NUAK1
530	16913681	-1.01988	8.57418	-10.9947	4.7367e-06	0.000479184	4.79152	FAM83D
531	17116684	-1.02694	9.69478	-10.9889	4.75532e-06	0.000480162	4.78741	VAMP7
532	16781315	-0.965253	7.93677	-10.9852	4.76721e-06	0.000480458	4.7848	RASA3
533	16704199	-1.21912	6.58541	-10.9501	4.8819e-06	0.000490292	4.75994	FXYD4
534	16880814	-1.2487	6.62071	-10.9497	4.88308e-06	0.000490292	4.75969	NA
535	17091043	1.3	6.92711	10.9417	4.90994e-06	0.000492058	4.75395	NA
536	16680284	1.12911	8.52152	10.9349	4.93241e-06	0.000492058	4.74917	CCNL2
537	16846476	1.1053	8.85907	10.9346	4.93344e-06	0.000492058	4.74895	SLC35B1
538	17087517	-1.75893	5.75561	-10.9309	4.94615e-06	0.000492058	4.74626	NR4A3
539	17105114	-0.865377	7.94964	-10.9307	4.94655e-06	0.000492058	4.74618	SH3BGRL
540	16909401	1.29223	7.93604	10.9265	4.96094e-06	0.000492575	4.74314	SLC16A14
541	16847839	1.13258	11.6543	10.9036	5.03859e-06	0.00049844	4.72689	DDX5,MIR5047
542	16847840	1.13258	11.6543	10.9036	5.03859e-06	0.00049844	4.72689	NA
543	16656829	1.36906	7.70915	10.8967	5.06239e-06	0.000499872	4.72195	NA
544	17039281	0.947784	9.79738	10.8902	5.08503e-06	0.000500906	4.71728	HLA-C
545	17122496	1.89135	7.23124	10.8883	5.09155e-06	0.000500906	4.71594	CYTOR,,MIR4435-2HG
546	16875970	0.913221	6.70092	10.8697	5.15654e-06	0.000502534	4.70267	ZNF550
547	16812803	0.900597	7.95723	10.8694	5.15774e-06	0.000502534	4.70242	WDR73
548	16873645	-2.15301	11.1074	-10.8689	5.15934e-06	0.000502534	4.7021	NA
549	17119138	-2.15301	11.1074	-10.8689	5.15934e-06	0.000502534	4.7021	NA
550	17119142	-2.15301	11.1074	-10.8689	5.15934e-06	0.000502534	4.7021	NA
551	16801789	1.03042	7.79299	10.8675	5.16434e-06	0.000502534	4.70109	NA
552	16860856	-0.900401	7.98537	-10.8559	5.20562e-06	0.000504816	4.69275	SCN1B
553	17018408	-1.04415	10.7269	-10.8556	5.20662e-06	0.000504816	4.69255	SPDEF
554	17087413	-0.939026	7.18625	-10.8289	5.30282e-06	0.000513216	4.67338	GALNT12
555	17043529	1.26921	7.78965	10.8232	5.32329e-06	0.000514268	4.66934	C1GALT1
556	17096285	-1.06039	7.43407	-10.8026	5.39925e-06	0.000520668	4.6545	CTSV
557	16777198	-1.00171	6.9067	-10.7963	5.42258e-06	0.000521729	4.64999	CRYL1
558	17122664	1.53772	8.1647	10.7901	5.44567e-06	0.000521729	4.64553	CYTOR,MIR4435-2HG
559	16773128	2.27214	6.95525	10.7896	5.44768e-06	0.000521729	4.64515	NA
560	17015084	0.93775	8.06919	10.7892	5.44917e-06	0.000521729	4.64486	SERPINB1
561	16667258	-0.959885	9.35607	-10.785	5.46486e-06	0.000522299	4.64185	FNBP1L
562	16847117	0.908652	9.91437	10.7792	5.48668e-06	0.000523451	4.63767	MTMR4
563	16974049	-1.07157	7.49775	-10.7734	5.50873e-06	0.000524621	4.63347	NA
564	17123832	-0.983084	6.96279	-10.7677	5.53046e-06	0.000524925	4.62935	FAM198B-AS1
565	17022887	-1.86506	5.61839	-10.7674	5.5315e-06	0.000524925	4.62915	HS3ST5
566	16929573	-0.919428	8.90775	-10.7638	5.54528e-06	0.000525303	4.62654	MCM5
567	16833708	-0.932473	9.09464	-10.7468	5.61067e-06	0.000529746	4.61425	LASP1
568	16754397	1.2547	5.2237	10.7456	5.61523e-06	0.000529746	4.6134
569	16874191	-1.57672	7.45029	-10.7434	5.62404e-06	0.000529746	4.61176	NA
570	17017900	-2.47253	7.80198	-10.7414	5.63171e-06	0.000529746	4.61033	HLA-DRB1
571	16692632	0.877197	9.52171	10.7328	5.66529e-06	0.000531972	4.6041	H2BC21
572	16713530	0.995522	7.52782	10.7282	5.68344e-06	0.000532743	4.60075	CXCL12
573	16835483	0.96306	8.08515	10.7196	5.71724e-06	0.000534158	4.59453	ATP5MC1
574	16874508	-2.09031	10.8455	-10.7168	5.72842e-06	0.000534158	4.59248	NA
575	16874510	-2.09031	10.8455	-10.7168	5.72842e-06	0.000534158	4.59248	NA
576	16919915	-0.859062	9.95711	-10.7038	5.78012e-06	0.000538043	4.58306	ZMYND8
577	16877297	2.29536	6.38128	10.6873	5.84635e-06	0.000542999	4.57112	TRIB2
578	16828450	-0.848407	8.4108	-10.6856	5.85362e-06	0.000542999	4.56981	CFDP1
579	16771570	-1.12026	7.72928	-10.6808	5.87288e-06	0.000543845	4.56637	RHOF
580	17015637	0.966642	10.3175	10.6682	5.92446e-06	0.00054621	4.55719	ELOVL2
581	16847824	0.849308	12.7987	10.6653	5.93629e-06	0.00054621	4.5551	NA
582	16723614	0.815187	7.78132	10.6651	5.93713e-06	0.00054621	4.55495	CD44
583	16749316	1.1011	7.02249	10.6647	5.93917e-06	0.00054621	4.55459	RASSF8
584	16723832	-1.04323	9.0475	-10.6552	5.97839e-06	0.000547477	4.54769	API5
585	16860545	-0.904216	8.92143	-10.655	5.97898e-06	0.000547477	4.54759	NUDT19
586	17041782	0.934781	9.31532	10.6539	5.98357e-06	0.000547477	4.54678	HLA-C
587	16777756	0.96276	7.42053	10.6472	6.01181e-06	0.00054864	4.54184	SLC46A3
588	16972167	1.08598	7.76308	10.644	6.02497e-06	0.00054864	4.53955	CPE
589	16891403	1.23019	6.16786	10.6435	6.02698e-06	0.00054864	4.5392	INHA
590	16656957	1.68239	6.19988	10.6318	6.07633e-06	0.000552194	4.53064	NA
591	17118690	1.0168	9.11449	10.6209	6.12278e-06	0.000555474	4.52265	SNHG12,SNORA61,SNORA44
592	16751999	1.58087	9.57681	10.5961	6.22965e-06	0.000562567	4.50449	NA
593	16805161	1.28764	7.1443	10.5958	6.2311e-06	0.000562567	4.50424	SLCO3A1
594	17087588	-0.855997	6.42449	-10.5944	6.23718e-06	0.000562567	4.50322	TMEFF1
595	16869960	2.406	6.53132	10.5931	6.24293e-06	0.000562567	4.50225	CYP4F11
596	16925809	1.04123	9.29144	10.5866	6.27127e-06	0.000563358	4.4975	DSCAM
597	17001100	1.24783	7.30809	10.5825	6.28937e-06	0.000563358	4.49447	NR3C1
598	16685330	0.818596	6.76924	10.5782	6.30819e-06	0.000563358	4.49134	GRIK3
599	16948871	-0.879402	9.70314	-10.5768	6.31437e-06	0.000563358	4.49031	PSMD2
600	16961826	-1.04251	8.07894	-10.5756	6.3196e-06	0.000563358	4.48944	MRPL47
601	17050328	1.26846	7.41886	10.5721	6.33527e-06	0.000563358	4.48684	DNAJB9
602	16653925	1.26503	6.97312	10.572	6.33576e-06	0.000563358	4.48676	NA
603	16654037	1.26503	6.97312	10.572	6.33576e-06	0.000563358	4.48676	NA
604	16848902	0.825873	8.02664	10.565	6.36702e-06	0.000565069	4.48159	UNC13D
605	17068385	-0.931547	6.58719	-10.5629	6.37609e-06	0.000565069	4.48009	GINS4
606	17045656	0.823981	7.5933	10.5591	6.39328e-06	0.000565658	4.47727	YKT6
607	16757894	-0.892108	10.2306	-10.5536	6.41787e-06	0.000566898	4.47324	,GATC
608	16810976	1.19487	8.40589	10.5294	6.52798e-06	0.00057473	4.45537	RPL4,SNORD18A
609	16810977	1.19487	8.40589	10.5294	6.52798e-06	0.00057473	4.45537	NA
610	17121592	1.27338	6.64158	10.523	6.55751e-06	0.000576148	4.45063	CCDC144A,,CCDC144B,CCDC144CP
611	16766627	0.987209	8.32135	10.5212	6.56557e-06	0.000576148	4.44934	B4GALNT1
612	17059771	1.41013	5.34228	10.5101	6.61697e-06	0.000579709	4.44115	SAMD9
613	17043095	1.07123	6.9156	10.5074	6.62979e-06	0.000579885	4.43911	SDK1
614	16748788	0.922408	8.05559	10.5036	6.64721e-06	0.000580462	4.43636	NA
615	17119976	-1.3507	6.46529	-10.4975	6.67629e-06	0.000582053	4.43177
616	16688469	-1.67406	5.15539	-10.4914	6.70486e-06	0.000582867	4.42728	PTGER3
617	17031781	0.920549	10.086	10.4891	6.71556e-06	0.000582867	4.42561	HLA-C
618	16739165	1.21159	7.46293	10.4886	6.71824e-06	0.000582867	4.42519	FADS3
619	16743764	2.47163	5.49525	10.4788	6.76474e-06	0.000585953	4.41794	MMP13
620	16994969	-0.879323	8.9595	-10.4748	6.78358e-06	0.000586637	4.41502	MTMR12
621	16809346	-0.927882	10.4307	-10.4697	6.80841e-06	0.000587836	4.41118	LEO1
622	16655037	1.49173	9.2452	10.4543	6.88288e-06	0.000593311	4.39975	NA
623	17125150	-1.54759	3.99923	-10.4475	6.91617e-06	0.000595223	4.39467
624	16863652	-1.2454	8.12631	-10.4402	6.95199e-06	0.000596956	4.38924	EHD2
625	17113725	0.820498	9.97018	10.4372	6.96637e-06	0.000596956	4.38707	LAMP2
626	16859368	0.868838	7.60916	10.4357	6.97376e-06	0.000596956	4.38596	SIN3B
627	16672583	-0.96191	10.0423	-10.4343	6.98083e-06	0.000596956	4.38489	PEA15
628	16851427	-0.94898	8.70476	-10.4271	7.01643e-06	0.000598126	4.37954	CABLES1
629	16692918	0.902068	7.98503	10.4271	7.01683e-06	0.000598126	4.37948	MINDY1
630	16814498	-1.01159	9.00987	-10.4096	7.10421e-06	0.000604613	4.36647	METRN
631	16764090	0.959075	7.69184	10.4048	7.12846e-06	0.000605716	4.36289	FKBP11
632	16654655	0.88615	12.1851	10.3874	7.21735e-06	0.000611593	4.34985	NA
633	16917849	1.53814	7.22931	10.3868	7.22044e-06	0.000611593	4.3494	THBD
634	16802650	-1.36893	6.72399	-10.3836	7.23662e-06	0.000611997	4.34705	NA
635	16722412	1.0622	5.02928	10.3746	7.28325e-06	0.000614933	4.34029	NA
636	16694701	1.01062	9.14112	10.372	7.29695e-06	0.000614933	4.33832	CRABP2
637	16920671	-1.03194	7.91228	-10.3698	7.30813e-06	0.000614933	4.33671	PMEPA1
638	16836732	0.917283	8.38439	10.3609	7.35487e-06	0.000614933	4.33	NA
639	17097880	-0.857134	9.28014	-10.3585	7.36712e-06	0.000614933	4.32825	FBXW2
640	16779119	-0.875637	9.71025	-10.3536	7.39315e-06	0.000614933	4.32454	KPNA3
641	17126218	1.32435	10.7565	10.3526	7.39856e-06	0.000614933	4.32377	LINC00632
642	17017495	0.962997	8.85994	10.3479	7.42331e-06	0.000614933	4.32026	NEU1
643	17026875	0.962997	8.85994	10.3479	7.42331e-06	0.000614933	4.32026	NEU1
644	17032134	0.962997	8.85994	10.3479	7.42331e-06	0.000614933	4.32026	NEU1
645	17034509	0.962997	8.85994	10.3479	7.42331e-06	0.000614933	4.32026	NEU1
646	17036841	0.962997	8.85994	10.3479	7.42331e-06	0.000614933	4.32026	NEU1
647	17039585	0.962997	8.85994	10.3479	7.42331e-06	0.000614933	4.32026	NEU1
648	16863684	-1.05869	8.69741	-10.3462	7.43191e-06	0.000614933	4.31904	SELENOW
649	16783265	1.46451	5.19761	10.3371	7.48071e-06	0.000618017	4.31215	NPAS3
650	17125104	1.33714	4.94523	10.3205	7.56996e-06	0.000624429	4.29967
651	16803197	1.04851	6.48933	10.3108	7.62262e-06	0.000627083	4.29237	NEIL1
652	16744822	1.20985	8.46507	10.3103	7.62553e-06	0.000627083	4.29197	BACE1
653	16692802	0.895426	7.5158	10.2979	7.6934e-06	0.000631653	4.28264	NA
654	16846745	0.937692	9.34679	10.2947	7.7113e-06	0.000631653	4.2802	SPAG9
655	16762146	-1.59367	6.26424	-10.2929	7.72078e-06	0.000631653	4.27891	KCNJ8
656	16982635	-0.949251	8.55543	-10.2893	7.74097e-06	0.000631653	4.27616	TRIP13
657	16761464	0.851762	5.76349	10.2882	7.74728e-06	0.000631653	4.2753	NA
658	17029348	0.964474	9.57275	10.287	7.75393e-06	0.000631653	4.2744	NEU1
659	16790614	0.897477	7.57934	10.2852	7.76357e-06	0.000631653	4.27309	AJUBA
660	17042101	0.949959	8.86069	10.2811	7.78639e-06	0.000632082	4.27	NEU1
661	16718687	-1.00883	6.49772	-10.2801	7.79242e-06	0.000632082	4.26918	C10orf82
662	16732045	0.996607	8.00354	10.2712	7.84238e-06	0.000635173	4.26245	UPK2
663	17122648	1.08902	7.75726	10.2604	7.90337e-06	0.000639148	4.2543	CYTOR,,MIR4435-2HG
664	16698980	0.865577	9.10577	10.2564	7.92627e-06	0.000640034	4.25125	SLC30A1
665	16993878	-0.927397	7.5617	-10.2484	7.97165e-06	0.000642484	4.24524	SLC12A7
666	17018215	0.869047	9.87287	10.2469	7.98057e-06	0.000642484	4.24406	TAPBP
667	16766578	1.19121	4.9174	10.2439	7.99737e-06	0.000642871	4.24185	DDIT3,
668	16697400	1.40497	5.17383	10.2379	8.03246e-06	0.000644579	4.23723	BRINP3
669	16654695	1.1093	7.74144	10.2361	8.04267e-06	0.000644579	4.2359	NA
670	16701092	-0.952827	7.27614	-10.2299	8.07844e-06	0.000646481	4.23122	OPN3
671	16872152	-1.08251	6.81339	-10.2222	8.12338e-06	0.000649107	4.22538	,FBXO17
672	17085187	0.838357	7.71176	10.2116	8.18617e-06	0.000653152	4.21727	GLIDR,
673	16846093	1.01767	7.41763	10.2067	8.21517e-06	0.000654492	4.21354	OSBPL7
674	16777896	-0.87345	11.0709	-10.1998	8.25607e-06	0.000656774	4.20831	HSPH1
675	17055519	-1.59044	4.03471	-10.186	8.33886e-06	0.000662377	4.1978	AGR3
676	16812831	0.800969	8.92659	10.1732	8.41626e-06	0.000667536	4.18806	SEC11A
677	16947626	-0.896317	11.565	-10.1489	8.56584e-06	0.000678397	4.16949	NMD3
678	16754111	-1.30402	6.64526	-10.1343	8.65769e-06	0.00068466	4.15825	KCNMB4
679	17108096	0.984682	7.14476	10.132	8.67167e-06	0.000684756	4.15655	ABCD1
680	16916682	-1.00707	8.13582	-10.1283	8.69499e-06	0.000685587	4.15372	SLC4A11
681	17026109	0.889702	8.16379	10.1223	8.73333e-06	0.000686591	4.14908	HLA-A
682	17027344	0.889702	8.16379	10.1223	8.73333e-06	0.000686591	4.14908	HLA-A
683	17094378	1.02556	7.81556	10.1154	8.77733e-06	0.000689039	4.14378	GLIDR,
684	16747211	-0.894642	5.85426	-10.1015	8.86642e-06	0.000695016	4.13313	PLEKHG6
685	17045404	0.846525	10.411	10.0941	8.91459e-06	0.000697771	4.12742	CDK13
686	16836333	0.874518	8.62577	10.0862	8.96586e-06	0.000699978	4.12137	SCPEP1
687	16981004	-0.825674	8.3509	-10.0858	8.96889e-06	0.000699978	4.12101	PPID
688	16829242	0.837785	9.64007	10.0716	9.0624e-06	0.000706201	4.11007	GALNS
689	16704977	1.95024	5.36978	10.0697	9.07497e-06	0.000706201	4.10861	PRKG1
690	16752014	1.24211	11.3706	10.0662	9.09792e-06	0.000706417	4.10595	NA
691	17057579	1.23154	7.56673	10.0653	9.1041e-06	0.000706417	4.10523	HUS1
692	16909411	1.23571	7.82497	10.0509	9.20017e-06	0.000712818	4.09416	RNY4P37,ATP5F1A,SLC16A14,RNY4P19
693	16922584	-0.922083	8.45069	-10.049	9.21318e-06	0.000712818	4.09267	CHAF1B
694	16962493	-0.924807	8.35701	-10.0379	9.28862e-06	0.00071762	4.08406	RFC4
695	17102829	0.86913	6.5132	10.0195	9.41485e-06	0.000726325	4.06982	MAOA
696	16803317	0.900664	9.6666	10.0072	9.49992e-06	0.000731835	4.06033	RCN2
697	17037511	0.86081	9.83791	9.9968	9.57288e-06	0.000736397	4.05225	TAPBP
698	16754889	-0.992335	4.5717	-9.98457	9.65944e-06	0.000738509	4.04275	NA
699	16832350	0.91576	7.50801	9.98387	9.66443e-06	0.000738509	4.0422	KSR1
700	17093204	0.80569	7.51785	9.9833	9.66843e-06	0.000738509	4.04177	BAG1
701	17030026	0.868484	9.83219	9.9832	9.6692e-06	0.000738509	4.04168	TAPBP
702	17032710	0.868484	9.83219	9.9832	9.6692e-06	0.000738509	4.04168	TAPBP
703	16828357	-0.898421	8.00231	-9.97032	9.76138e-06	0.000744489	4.03167	FA2H
704	16766279	1.18091	8.05907	9.96612	9.79162e-06	0.000744885	4.0284	ATP5F1B
705	16918679	0.916769	7.03728	9.96574	9.79435e-06	0.000744885	4.02811	MMP24OS,
706	17118694	1.22643	11.0796	9.95889	9.84399e-06	0.000747232	4.02277	SNHG12,SNORA16A
707	17052935	-0.931821	7.36473	-9.95591	9.86567e-06	0.000747232	4.02045	OR2A20P,,OR2A9P
708	17112123	-1.2943	5.39771	-9.95417	9.87834e-06	0.000747232	4.01909	PABPC1L2B-AS1,
709	16834302	1.04627	9.42448	9.95381	9.88096e-06	0.000747232	4.01881	ATP6V0A1
710	16753426	1.18181	9.25507	9.95031	9.90655e-06	0.000748112	4.01608	SRGAP1
711	16875108	-2.84163	5.58126	-9.94313	9.95919e-06	0.000750941	4.01048	ZNF320
712	16894452	0.7651	9.7243	9.94139	9.97202e-06	0.000750941	4.00912	PDIA6
713	16854316	-0.773946	8.9339	-9.93069	1.00512e-05	0.000755842	4.00077	OSBPL1A
714	17056649	0.833268	9.67768	9.92468	1.0096e-05	0.00075815	3.99607	HERPUD2
715	16732067	1.15589	7.41829	9.90962	1.02092e-05	0.000765561	3.98429	CCDC84
716	17067926	-0.852269	9.09525	-9.90776	1.02233e-05	0.000765561	3.98284	PLPBP
717	17083614	0.871648	8.23201	9.89965	1.02849e-05	0.000769104	3.97649	LURAP1L
718	16851964	1.02656	9.51229	9.89202	1.03434e-05	0.000772313	3.9705	ELP2
719	16871202	-0.863176	8.58249	-9.88644	1.03863e-05	0.000772313	3.96613	RHPN2
720	16863705	-1.48436	8.39358	-9.88319	1.04114e-05	0.000772313	3.96358	NA
721	16863711	-1.48436	8.39358	-9.88319	1.04114e-05	0.000772313	3.96358	NA
722	16863721	-1.48436	8.39358	-9.88319	1.04114e-05	0.000772313	3.96358	NA
723	16651237	1.07163	9.75594	9.88282	1.04143e-05	0.000772313	3.96329	NA
724	16655549	1.55576	4.18901	9.88012	1.04351e-05	0.000772791	3.96117	NA
725	17040221	0.87222	9.83979	9.87404	1.04824e-05	0.000775222	3.95639	TAPBP
726	17010941	0.996407	8.33846	9.86955	1.05175e-05	0.000776744	3.95287	PM20D2
727	16803212	1.02549	7.32347	9.84809	1.06868e-05	0.000788165	3.93598	SNX33
728	16983451	0.901858	10.4562	9.83765	1.07703e-05	0.000793229	3.92776	BASP1
729	16740914	0.872658	7.82335	9.83545	1.0788e-05	0.000793443	3.92603	PC
730	16979515	-0.871657	10.2725	-9.82904	1.08397e-05	0.000796153	3.92097	CCNA2
731	16914741	1.04236	9.18781	9.81538	1.09508e-05	0.000800963	3.91019	ZFAS1,,SNORD12C
732	16771575	-1.45166	10.0152	-9.81418	1.09607e-05	0.000800963	3.90924	NA
733	17063420	-0.876157	7.82775	-9.8137	1.09646e-05	0.000800963	3.90887	ZC3HAV1L
734	16832319	0.860207	10.1772	9.81366	1.09649e-05	0.000800963	3.90883	WSB1
735	16903140	-0.883917	8.91676	-9.80426	1.10422e-05	0.000805513	3.9014	CXCR4
736	16654669	0.969958	9.89914	9.79823	1.10921e-05	0.000808054	3.89663	NA
737	16858958	-1.02676	8.30198	-9.79593	1.11113e-05	0.000808348	3.89481	MISP3
738	16965377	1.01794	5.82069	9.78489	1.12035e-05	0.000813957	3.88607	SLIT2
739	16752495	0.810417	10.1433	9.78165	1.12307e-05	0.000814827	3.88351	ESYT1
740	16706906	-2.17446	7.53433	-9.77317	1.13024e-05	0.000818794	3.87678	ADIRF
741	16762489	0.829391	7.88528	9.77157	1.13159e-05	0.000818794	3.87551	ITPR2
742	17112623	-0.952062	7.51463	-9.76943	1.13342e-05	0.000819008	3.87381	SYTL4
743	16687123	-1.3148	6.22099	-9.76059	1.14095e-05	0.000823345	3.8668	RAB3B
744	17037670	1.1002	6.51464	9.75828	1.14294e-05	0.000823667	3.86496	HLA-A
745	16912192	-0.796712	9.41894	-9.75479	1.14594e-05	0.000824232	3.86219	GINS1
746	17125352	1.4098	6.20703	9.75379	1.14679e-05	0.000824232	3.8614	,RPL7AP28,RPL7AP49
747	17085722	0.822194	8.47292	9.75133	1.14892e-05	0.000824652	3.85944	FAM189A2
748	16823353	-0.785367	7.49201	-9.74423	1.15506e-05	0.000827956	3.8538	ZNF597
749	16656993	1.88645	5.62217	9.73833	1.16021e-05	0.000830531	3.8491	NA
750	16868017	-0.92945	7.45374	-9.73483	1.16327e-05	0.000831603	3.84631	PRR36
751	17121244	-0.783889	8.14958	-9.73147	1.16621e-05	0.000831603	3.84364
752	17063981	-0.82868	8.92447	-9.7313	1.16636e-05	0.000831603	3.84351	TCAF1
753	16811994	0.840718	7.84922	9.72266	1.17397e-05	0.000835921	3.83662	PEAK1
754	16997245	0.955579	6.25042	9.70277	1.19171e-05	0.000847425	3.82075	FAM169A
755	17095936	-0.805176	7.87298	-9.70043	1.19382e-05	0.0008478	3.81888	BICD2
756	16851933	-0.78223	9.81346	-9.69604	1.19778e-05	0.000849487	3.81538	GALNT1
757	17121282	1.09264	8.46903	9.69269	1.20081e-05	0.000850513	3.8127	GOLGA8A,GOLGA8B
758	16796998	-0.988512	6.13146	-9.68822	1.20487e-05	0.000851643	3.80913	CKB
759	17105249	-1.14429	3.36174	-9.68745	1.20558e-05	0.000851643	3.80851	PCDH11X
760	16925983	1.17893	7.12898	9.68353	1.20916e-05	0.000852646	3.80537	C2CD2
761	16821737	1.47559	7.41958	9.68241	1.21018e-05	0.000852646	3.80447	NA
762	17057422	1.37702	9.8185	9.67994	1.21244e-05	0.000853114	3.8025	SNHG15,SNORA9
763	17088929	-0.872565	7.82532	-9.67516	1.21683e-05	0.000854809	3.79867	NEK6
764	16676263	0.859378	10.3835	9.67386	1.21803e-05	0.000854809	3.79763	ZC3H11A,ZBED6
765	16834071	-0.820011	8.10156	-9.67183	1.2199e-05	0.000854998	3.79601	RARA
766	16686376	0.866498	7.71928	9.66632	1.225e-05	0.000857454	3.79159	ZSWIM5
767	17119498	1.0939	9.30751	9.64836	1.24179e-05	0.000865813	3.77718	SNHG32,SNORD52
768	17119536	1.0939	9.30751	9.64836	1.24179e-05	0.000865813	3.77718	SNHG32,SNORD52
769	17119598	1.0939	9.30751	9.64836	1.24179e-05	0.000865813	3.77718	SNHG32,SNORD52
770	16845222	1.02457	8.77322	9.64493	1.24502e-05	0.000866158	3.77443	EZH1
771	17098506	-1.0054	8.57477	-9.64441	1.24552e-05	0.000866158	3.77401	NIBAN2
772	17023810	-1.01395	5.12136	-9.64096	1.24878e-05	0.000867301	3.77124	SGK1
773	16725783	1.21169	5.7113	9.639	1.25063e-05	0.000867466	3.76967	BEST1
774	17082362	-0.926729	9.04929	-9.63357	1.2558e-05	0.000869927	3.7653	EPPK1
775	16703659	1.11186	5.75079	9.62584	1.2632e-05	0.00087358	3.75908	NA
776	17044382	-1.07888	7.38375	-9.62465	1.26433e-05	0.00087358	3.75813	MPP6
777	16941781	-0.822251	9.59611	-9.61767	1.27106e-05	0.000877098	3.75251	PRKCD
778	16763964	0.951475	11.5533	9.61411	1.27451e-05	0.000877766	3.74964	SNORA2C,MIR1291
779	16828886	-0.973915	9.30156	-9.61329	1.2753e-05	0.000877766	3.74898	GINS2
780	16823477	1.04324	8.52373	9.60803	1.28042e-05	0.000880156	3.74475	ADCY9
781	17120920	1.53591	6.03015	9.60458	1.28379e-05	0.000881344	3.74196	TPTE2P2,
782	16789723	-1.02928	7.46311	-9.58588	1.30221e-05	0.000891685	3.72687	CRIP2
783	16744616	1.1375	4.78181	9.58437	1.30371e-05	0.000891685	3.72565	NA
784	16668002	0.96745	10.7395	9.58288	1.30519e-05	0.000891685	3.72445	FAM102B
785	17114585	-1.08899	6.32855	-9.5822	1.30587e-05	0.000891685	3.72389	NA
786	16914478	-1.00727	7.2443	-9.5809	1.30717e-05	0.000891685	3.72285	EYA2
787	17011098	0.738014	9.78874	9.57499	1.31308e-05	0.000894578	3.71807	UFL1
788	16971443	0.863094	7.52823	9.56785	1.32026e-05	0.000897123	3.71229	FAM160A1
789	16979800	1.20179	5.69154	9.56606	1.32206e-05	0.000897123	3.71084
790	16941024	1.10603	8.12182	9.56416	1.32398e-05	0.000897123	3.70931	SEMA3B
791	17022362	0.935935	7.23428	9.56366	1.32448e-05	0.000897123	3.7089	SESN1
792	16768941	1.1062	6.5877	9.56183	1.32634e-05	0.000897123	3.70742	IKBIP
793	16753125	0.829633	10.9491	9.56092	1.32726e-05	0.000897123	3.70669	OS9
794	16873686	0.924069	6.68035	9.55946	1.32874e-05	0.000897123	3.7055	NA
795	17046284	0.761895	10.0619	9.55652	1.33174e-05	0.000897123	3.70312	SUMF2
796	16749423	-0.85647	7.39039	-9.55639	1.33187e-05	0.000897123	3.70301	ARNTL2
797	16736529	-0.864372	8.49225	-9.54878	1.33964e-05	0.000901223	3.69685	UEVLD
798	17062280	1.06838	6.61858	9.53516	1.35369e-05	0.000909532	3.6858	AASS
799	16757416	-0.988058	8.35011	-9.52729	1.36187e-05	0.000913883	3.67941	RITA1
800	16891258	-0.922913	4.24836	-9.52371	1.36562e-05	0.000915254	3.6765
801	16656411	1.14533	7.94774	9.51659	1.37309e-05	0.000919113	3.67071	NA
802	17122666	1.08388	7.12948	9.51012	1.37993e-05	0.000921068	3.66545	CYTOR,MIR4435-2HG
803	17021407	0.798027	8.44157	9.50993	1.38013e-05	0.000921068	3.66529	SNHG5
804	17063233	-0.758455	10.0326	-9.50896	1.38116e-05	0.000921068	3.6645	MTPN
805	16998850	-0.913714	6.44826	-9.50071	1.38994e-05	0.000925767	3.65779	EPB41L4A
806	16730845	0.780653	7.59856	9.49082	1.40055e-05	0.000930965	3.64973	ATM
807	16971465	1.04511	6.01252	9.4902	1.40121e-05	0.000930965	3.64922	FAM160A1
808	16654689	1.17985	9.24679	9.48566	1.40612e-05	0.000933071	3.64552	NA
809	17045032	0.874046	6.32807	9.47415	1.41864e-05	0.00094021	3.63612	BBS9
810	16654657	0.871225	12.4266	9.46905	1.42422e-05	0.000942743	3.63196	NA
811	16856946	-0.89968	10.3569	-9.46206	1.43191e-05	0.000945676	3.62625	NFIC
812	16771525	-1.37804	9.38041	-9.46183	1.43217e-05	0.000945676	3.62605	NA
813	16768006	1.47799	4.13986	9.45626	1.43834e-05	0.000948577	3.6215	MIR618
814	16703770	0.811688	5.5006	9.44375	1.45229e-05	0.000956603	3.61126	CCDC7
815	16795612	-1.16915	5.69512	-9.44012	1.45637e-05	0.000958114	3.60829	EML5
816	16759500	-0.941882	8.31024	-9.43808	1.45867e-05	0.000958452	3.60661	NOC4L
817	17114567	0.924633	10.4531	9.4342	1.46305e-05	0.000960151	3.60343	RBMX,SNORD61
818	16807139	1.17202	6.47505	9.42516	1.47332e-05	0.000965709	3.59602	NA
819	17060061	0.812688	8.02252	9.42263	1.47621e-05	0.000966419	3.59394	ASNS,
820	17120274	1.07512	7.7467	9.41973	1.47952e-05	0.000967405	3.59156
821	17037192	-0.763037	7.7512	-9.41479	1.48519e-05	0.000969935	3.5875	HLA-DRB4
822	17085610	1.4451	5.54816	9.41237	1.48797e-05	0.000970566	3.58552	PGM5
823	16722405	-1.04473	8.1323	-9.4088	1.49209e-05	0.000972072	3.58259	OR7E14P
824	17028028	0.872833	9.29306	9.40248	1.49943e-05	0.000975665	3.57738	SNHG32,SNORD48
825	16858823	-0.815653	10.3057	-9.39766	1.50503e-05	0.000977158	3.57343	NACC1
826	16839425	0.902188	8.81107	9.39738	1.50537e-05	0.000977158	3.57319	SLC43A2
827	16771242	-1.06249	9.0919	-9.38847	1.5158e-05	0.000982743	3.56586	PXN
828	16914096	1.12567	8.56941	9.38578	1.51897e-05	0.000983608	3.56365	KCNK15
829	16732569	0.964177	7.67007	9.38263	1.5227e-05	0.000984046	3.56104	SC5D
830	16875166	-2.01968	5.18965	-9.3821	1.52332e-05	0.000984046	3.56061	ZNF347
831	17084669	1.35126	6.49629	9.37762	1.52864e-05	0.000986292	3.55692	RUSC2
832	16696177	0.735259	9.5731	9.37022	1.53745e-05	0.000990788	3.55081	SLC19A2
833	16654685	1.21864	8.5815	9.36317	1.54591e-05	0.000995041	3.54499	NA
834	16764105	1.13502	10.2747	9.35733	1.55295e-05	0.000995538	3.54017	NA
835	16850216	-1.03737	8.0204	-9.357	1.55335e-05	0.000995538	3.5399	SECTM1
836	16654691	0.934786	8.11086	9.3564	1.55407e-05	0.000995538	3.5394	NA
837	16807976	0.859473	7.06332	9.35637	1.55411e-05	0.000995538	3.53938	TTBK2
838	17120094	1.26854	4.87708	9.35211	1.55927e-05	0.000997656	3.53586	NA
839	16867414	-0.845567	8.39782	-9.35017	1.56163e-05	0.000997746	3.53426	PLIN3
840	17020620	0.761283	8.99991	9.34894	1.56314e-05	0.000997746	3.53323	LMBRD1
841	17125058	0.746199	6.29524	9.34158	1.57213e-05	0.00100229	3.52715
842	17045738	1.15681	8.43459	9.33437	1.58099e-05	0.00100675	3.52118	PPIA
843	16684178	0.938998	8.0932	9.33077	1.58543e-05	0.00100838	3.5182	SNHG12
844	16978995	0.829233	8.28549	9.32582	1.59158e-05	0.00100993	3.51409	ELOVL6
845	17114690	1.31838	5.81923	9.32577	1.59164e-05	0.00100993	3.51406	SOX3
846	16797196	-0.880619	7.04255	-9.32327	1.59475e-05	0.0010107	3.51198	AHNAK2
847	16836985	0.786748	9.10239	9.31281	1.60782e-05	0.00101779	3.50331	MAP3K3
848	16826243	0.75815	9.34917	9.30521	1.61741e-05	0.00102265	3.497	ITFG1
849	16724471	0.766094	8.81559	9.29947	1.62469e-05	0.00102521	3.49224	DDB2
850	17076285	-0.931939	7.6307	-9.29901	1.62528e-05	0.00102521	3.49185	RAB11FIP1
851	17005865	-1.29363	12.2839	-9.28581	1.64217e-05	0.00103439	3.48087	H2BC14
852	16835374	0.852667	10.689	9.28397	1.64454e-05	0.00103439	3.47934	NFE2L1
853	16938562	1.03317	8.26834	9.28313	1.64562e-05	0.00103439	3.47865	TGFBR2
854	16775856	0.808936	9.76378	9.27675	1.65387e-05	0.00103836	3.47334	DNAJC3
855	16893414	-0.979762	6.46804	-9.27376	1.65775e-05	0.00103958	3.47085	ANO7
856	16668919	-0.994753	8.42203	-9.26826	1.66492e-05	0.00104285	3.46626	MAGI3
857	16893846	-1.00729	8.59845	-9.26197	1.67316e-05	0.00104679	3.46102	PXDN
858	16655613	1.16656	6.90165	9.26004	1.6757e-05	0.00104716	3.45941	NA
859	17125108	-0.898682	6.2706	-9.24556	1.69488e-05	0.00105727	3.44732	NA
860	17125032	1.09145	4.41197	9.24486	1.69582e-05	0.00105727	3.44673	ASNSP1
861	16926644	0.910541	9.32537	9.23152	1.71372e-05	0.00106718	3.43558	LSS
862	16653927	1.44243	8.75104	9.22344	1.72466e-05	0.00107151	3.42882	NA
863	16654039	1.44243	8.75104	9.22344	1.72466e-05	0.00107151	3.42882	NA
864	16658192	-0.83699	7.06709	-9.22187	1.7268e-05	0.0010716	3.4275	TP73
865	17011079	0.85227	9.19996	9.21591	1.73493e-05	0.00107487	3.42251	MANEA
866	17058826	-0.785531	9.44937	-9.21419	1.73728e-05	0.00107487	3.42107	HIP1
867	17082132	0.919828	7.19133	9.21241	1.73972e-05	0.00107487	3.41958	NAPRT
868	16941167	0.827618	7.18808	9.21213	1.7401e-05	0.00107487	3.41935	MANF
869	17022939	-0.842436	8.36687	-9.19986	1.75704e-05	0.00108362	3.40906	TSPYL4
870	16849970	-0.729495	9.84828	-9.19895	1.7583e-05	0.00108362	3.4083	ARHGDIA
871	16674185	-1.08591	6.26803	-9.19029	1.77038e-05	0.00108981	3.40102	BRINP2
872	16654769	1.32827	8.74224	9.18796	1.77364e-05	0.00108998	3.39907	NA
873	16907044	0.877218	7.98728	9.18719	1.77472e-05	0.00108998	3.39842	SATB2
874	16790673	0.805155	8.1339	9.1819	1.78216e-05	0.0010933	3.39397	CDH24
875	16870144	-0.877372	8.67363	-9.17934	1.78578e-05	0.00109426	3.39182	NR2F6
876	17045380	1.04877	9.36567	9.17562	1.79104e-05	0.00109517	3.38869	LINC00265
877	16925752	1.15779	8.34883	9.17541	1.79134e-05	0.00109517	3.38852	HMGN1
878	16883647	-1.30959	7.16837	-9.17055	1.79825e-05	0.00109702	3.38442	IL1R1
879	16952639	-0.829477	9.84541	-9.1704	1.79846e-05	0.00109702	3.3843	,HIGD1A
880	16720318	-0.775846	7.81801	-9.15939	1.81422e-05	0.00110466	3.37503	TALDO1
881	17047985	0.841765	6.97443	9.15878	1.8151e-05	0.00110466	3.37451	ADAM22
882	16920006	1.3352	8.12918	9.15246	1.82422e-05	0.00110895	3.36918	LINC01522
883	16985614	-0.827538	7.15745	-9.1482	1.83039e-05	0.00111027	3.3656	CENPH
884	16804205	0.857743	7.04438	9.14671	1.83255e-05	0.00111027	3.36434	ZSCAN2
885	16654649	1.01935	12.0998	9.1459	1.83374e-05	0.00111027	3.36365	NA
886	16692197	0.980458	7.66532	9.14384	1.83674e-05	0.00111027	3.36191	PDZK1,PDZK1P1
887	16692371	0.980458	7.66532	9.14384	1.83674e-05	0.00111027	3.36191	PDZK1,PDZK1P1
888	16833139	-0.758068	9.73919	-9.13936	1.84328e-05	0.00111297	3.35813	PSMD11
889	16698312	0.756721	8.68269	9.13711	1.84659e-05	0.00111371	3.35623	PLEKHA6
890	16860266	-1.60363	6.18105	-9.13467	1.85016e-05	0.00111384	3.35417	ZNF492
891	16842147	1.21206	5.97147	9.13412	1.85097e-05	0.00111384	3.35371	CCDC144B
892	16657403	-1.65729	3.55353	-9.13248	1.8534e-05	0.00111405	3.35232	NA
893	17118250	-0.774975	10.375	-9.12963	1.85759e-05	0.00111532	3.34992	NA
894	16918351	-0.832017	8.55736	-9.12268	1.86789e-05	0.00111894	3.34404	,COMMD7
895	17005894	1.04546	5.76866	9.12254	1.86809e-05	0.00111894	3.34392	ZSCAN12P1
896	17121640	0.953884	5.5624	9.12134	1.86988e-05	0.00111894	3.34291
897	17045303	0.749202	7.14561	9.11541	1.87873e-05	0.00112206	3.33789	STARD3NL
898	16922779	0.798013	8.98071	9.11504	1.87928e-05	0.00112206	3.33757	ETS2
899	17070221	-1.51582	6.18146	-9.11278	1.88266e-05	0.0011224	3.33566	PKIA
900	17012379	-0.801872	7.04908	-9.11187	1.88403e-05	0.0011224	3.33489	CENPW
901	16651241	0.90652	7.25008	9.11023	1.88649e-05	0.00112262	3.3335	NA
902	17059824	1.97152	3.95095	9.10699	1.89137e-05	0.00112427	3.33076	MIR653
903	17117588	-0.781982	9.1947	-9.10204	1.89884e-05	0.00112747	3.32656
904	16907257	1.00174	8.88778	9.09809	1.90483e-05	0.00112977	3.32322	TRAK2
905	16911651	-0.842582	7.95439	-9.09652	1.90721e-05	0.00112993	3.32189	DSTN
906	16825535	0.884492	10.6968	9.08892	1.91882e-05	0.00113545	3.31544	,SLC7A5P1
907	17121600	0.971101	6.53556	9.0866	1.92236e-05	0.00113545	3.31347	FAM106A
908	17121278	0.807893	5.27113	9.08503	1.92477e-05	0.00113545	3.31214
909	16809457	-0.7196	9.11446	-9.08488	1.925e-05	0.00113545	3.31201	MYO5A
910	16705024	2.02198	4.85609	9.07719	1.93686e-05	0.00114086	3.30548	RNA5SP318
911	16768738	0.838606	6.38698	9.07618	1.93842e-05	0.00114086	3.30463	NTN4
912	16994521	-1.30587	7.01672	-9.06913	1.94939e-05	0.00114606	3.29863	ANKH
913	16652863	1.95342	6.36728	9.06009	1.96353e-05	0.0011531	3.29094	NA
914	17078102	0.730003	9.96959	9.05782	1.9671e-05	0.00115384	3.28901	TRAM1
915	16691414	-0.882757	9.47674	-9.05655	1.96909e-05	0.00115384	3.28793	IGSF3
916	16931569	0.936174	7.36496	9.04043	1.99468e-05	0.00116756	3.2742	CRELD2
917	16847810	0.810068	8.0296	9.03609	2.00164e-05	0.00116933	3.27049	POLG2
918	16846800	0.834197	8.44831	9.03582	2.00207e-05	0.00116933	3.27026	MBTD1
919	16904270	-0.877942	7.08346	-9.0327	2.00708e-05	0.00117098	3.2676	MXRA7P1
920	17020464	-0.95355	7.83407	-9.02834	2.01413e-05	0.00117382	3.26387	RAB23
921	16723662	-1.2218	8.34262	-9.02165	2.02496e-05	0.00117681	3.25817	FJX1
922	16835816	1.14213	6.66792	9.02097	2.02606e-05	0.00117681	3.25759	ACSF2
923	16965798	0.832046	7.61342	9.01927	2.02883e-05	0.00117681	3.25614	PCDH7
924	17013784	-0.728483	11.5792	-9.01845	2.03018e-05	0.00117681	3.25543	ARMT1
925	16911212	-0.844058	9.90759	-9.01841	2.03024e-05	0.00117681	3.2554	MCM8,
926	16945101	-0.969933	9.66927	-9.01692	2.03267e-05	0.00117684	3.25412	MCM2
927	16760350	-1.09532	6.42777	-9.0157	2.03467e-05	0.00117684	3.25308	SCNN1A
928	16977378	0.91315	10.342	9.0119	2.04089e-05	0.00117916	3.24983	TMEM150C
929	16802553	0.982864	8.4002	9.00662	2.04957e-05	0.00118291	3.24531	RPLP1
930	16932008	-0.758469	8.15975	-8.99831	2.06332e-05	0.00118955	3.2382	BID
931	16959320	1.44634	4.3751	8.99698	2.06552e-05	0.00118955	3.23706	BFSP2-AS1
932	16656951	1.7023	3.29025	8.9944	2.06982e-05	0.00119075	3.23485	NA
933	16745561	1.01203	6.94703	8.98548	2.08475e-05	0.0011976	3.2272	HSPA8,SNORD14E,SNORD14D
934	16810743	0.838678	7.30377	8.98428	2.08676e-05	0.0011976	3.22618	IGDCC3
935	16940593	0.769337	8.22754	8.98329	2.08843e-05	0.0011976	3.22533	P4HTM
936	16656629	1.02969	8.76426	8.97547	2.10164e-05	0.00120388	3.21862	NA
937	17042650	0.769333	8.00657	8.9681	2.11417e-05	0.0012092	3.21229	CUTA
938	17120290	0.971951	6.35604	8.96683	2.11634e-05	0.0012092	3.2112
939	16888317	-0.856168	9.09622	-8.96604	2.11769e-05	0.0012092	3.21052	ITPRID2
940	16858805	-0.810499	7.74269	-8.96294	2.12298e-05	0.00121094	3.20786	NFIX
941	16864975	-1.04602	7.562	-8.96107	2.12619e-05	0.00121148	3.20626	ZNF813
942	16686201	1.07315	8.67309	8.95895	2.12984e-05	0.00121208	3.20443	SLC6A9
943	17028016	0.871107	7.42062	8.95783	2.13177e-05	0.00121208	3.20347	SNHG32
944	17118880	1.27179	5.36934	8.95624	2.1345e-05	0.00121235	3.2021	LINC00173
945	16849788	0.735038	8.59154	8.93152	2.17761e-05	0.00123456	3.18082	SLC38A10
946	16747661	1.19501	6.71347	8.92889	2.18226e-05	0.00123456	3.17854	MIR200C
947	16712482	0.754598	8.27075	8.9286	2.18276e-05	0.00123456	3.1783	PIP4K2A
948	17122540	-0.72967	7.6428	-8.92857	2.18283e-05	0.00123456	3.17827	NA
949	16818927	0.782344	9.46169	8.92021	2.19765e-05	0.00124164	3.17106	CHD9
950	17122490	1.43792	7.17807	8.9163	2.20464e-05	0.00124428	3.16768	MIR4435-2HG
951	16786403	-0.969562	5.19022	-8.91067	2.21472e-05	0.00124782	3.16282	BBOF1
952	17062679	-0.805887	8.73309	-8.9102	2.21557e-05	0.00124782	3.16242	IMPDH1
953	16670728	0.779809	8.41876	8.90425	2.2263e-05	0.00125255	3.15727	BNIPL,C1orf56
954	16998368	0.783833	8.00753	8.9024	2.22964e-05	0.00125311	3.15567	ERAP1
955	16843987	-0.76805	8.85613	-8.90058	2.23295e-05	0.00125366	3.15409	PCGF2
956	17120492	1.0771	8.0779	8.89696	2.23951e-05	0.00125603	3.15097	NA
957	16871000	0.917655	5.97242	8.89022	2.25182e-05	0.00126161	3.14513	NA
958	17022295	0.775385	10.3008	8.88733	2.25712e-05	0.00126326	3.14263	SEC63
959	16782408	0.938328	4.70739	8.88228	2.26641e-05	0.00126584	3.13826	NA
960	16847565	0.782603	9.8859	8.88226	2.26645e-05	0.00126584	3.13824	CYB561
961	16762126	-1.01875	4.59103	-8.87937	2.27178e-05	0.00126749	3.13574	LDHB
962	16804539	-0.826568	10.4765	-8.87761	2.27503e-05	0.00126799	3.13421	ABHD2
963	16816386	-0.775301	7.18132	-8.87593	2.27814e-05	0.0012684	3.13276	TMC7
964	16773946	-0.831503	10.4567	-8.87148	2.28642e-05	0.00127169	3.12889	RFC3
965	16810514	0.752967	12.336	8.85973	2.30841e-05	0.00128259	3.1187	PPIB,CSNK1G1
966	16780917	0.847126	6.58774	8.85047	2.32591e-05	0.00129098	3.11065	IRS2
967	16726790	-0.705454	9.00113	-8.84369	2.33882e-05	0.0012968	3.10476	POLA2,
968	17059628	0.68405	10.8441	8.83654	2.35252e-05	0.00130305	3.09854	CYP51A1,
969	16834327	0.85465	8.2219	8.83409	2.35723e-05	0.00130431	3.0964	NAGLU
970	17082081	-0.997063	7.1703	-8.83133	2.36255e-05	0.00130591	3.094	RHPN1-AS1
971	16872621	-2.47289	6.4257	-8.81973	2.38508e-05	0.00131519	3.08389	NA
972	16988801	-0.7489	10.8971	-8.8188	2.3869e-05	0.00131519	3.08308	SLC12A2
973	17033604	-0.865003	5.19544	-8.81848	2.38753e-05	0.00131519	3.0828	HLA-DRA,
974	17043613	-1.84716	5.76578	-8.81719	2.39005e-05	0.00131519	3.08167
975	16973038	1.07962	7.01546	8.81639	2.39161e-05	0.00131519	3.08098	CYP4V2
976	16877795	-0.830103	8.09796	-8.8117	2.40081e-05	0.00131694	3.07689	EFR3B
977	16978054	0.920961	4.9098	8.81047	2.40324e-05	0.00131694	3.07581	UNC5C
978	16712825	-0.738053	8.25988	-8.81001	2.40414e-05	0.00131694	3.07541	MPP7
979	16854727	0.718042	13.1835	8.80977	2.40461e-05	0.00131694	3.0752	SLC39A6
980	16886448	1.15397	6.70725	8.80491	2.4142e-05	0.00132042	3.07096	LYPD6
981	17122782	1.13553	6.93561	8.80353	2.41693e-05	0.00132042	3.06975
982	16759604	-1.07109	8.9818	-8.80281	2.41836e-05	0.00132042	3.06913	PGAM5
983	16654681	1.17801	8.32906	8.80023	2.42349e-05	0.00132187	3.06687	NA
984	16852647	-0.898832	6.64063	-8.79522	2.43346e-05	0.00132596	3.06249	ZNF532
985	16746696	0.910189	8.45721	8.79136	2.44119e-05	0.00132874	3.05911	ADIPOR2
986	16890126	0.70088	8.61943	8.7902	2.44351e-05	0.00132874	3.0581	PIKFYVE
987	17024633	-0.708536	8.84271	-8.78608	2.45178e-05	0.00133189	3.0545	NUP43
988	16835071	0.777003	7.9621	8.77349	2.47727e-05	0.00134349	3.04348	LRRC37A,LRRC37A2,LRRC37A3
989	16725984	0.688733	10.7966	8.77306	2.47816e-05	0.00134349	3.04309	SLC3A2
990	16869653	-0.824756	9.57424	-8.76472	2.49521e-05	0.00135137	3.03578	DNAJB1
991	16916261	0.73284	10.1407	8.76341	2.4979e-05	0.00135146	3.03463	PCMTD2,
992	16675239	-1.41388	7.24681	-8.75944	2.50607e-05	0.00135451	3.03116	NA
993	17066083	1.23028	8.41255	8.75801	2.50902e-05	0.00135474	3.0299	PDGFRL
994	16690594	-0.884731	9.64118	-8.75633	2.51249e-05	0.00135512	3.02843	PSMA5
995	16907488	0.840062	8.29505	8.75523	2.51477e-05	0.00135512	3.02746	RAPH1
996	16978417	0.807463	7.41895	8.75342	2.51853e-05	0.00135578	3.02587	SLC39A8
997	16757687	-0.843776	9.5095	-8.74949	2.52668e-05	0.00135881	3.02243	RFC5
998	17096904	-0.780756	6.98476	-8.74152	2.54334e-05	0.0013664	3.01542	CTNNAL1
999	16654651	0.724233	13.075	8.7351	2.55685e-05	0.00137228	3.00977	NA
1000	16676258	0.842685	10.2004	8.73324	2.56076e-05	0.001373	3.00814	ZC3H11A,ZBED6
1001	16838392	0.683624	7.97724	8.73077	2.566e-05	0.00137444	3.00596	PGS1
1002	16758671	-0.720376	9.25697	-8.72126	2.58621e-05	0.00138388	2.9976	TCTN2
1003	16795394	0.77395	10.4886	8.71973	2.5895e-05	0.00138393	2.99624	SEL1L
1004	16769481	1.62085	4.98531	8.71748	2.59431e-05	0.00138393	2.99427	ALDH1L2
1005	17070514	-0.709492	10.6819	-8.71697	2.5954e-05	0.00138393	2.99382	WWP1
1006	17081447	-0.908118	7.38784	-8.71595	2.59759e-05	0.00138393	2.99292	ST3GAL1
1007	17121284	0.993497	8.41885	8.71506	2.59951e-05	0.00138393	2.99213	GOLGA8A,GOLGA8B
1008	17067890	-0.987101	8.66412	-8.71151	2.60714e-05	0.00138393	2.989	ZNF703
1009	16773967	0.703504	8.25382	8.71081	2.60865e-05	0.00138393	2.98839	NBEA
1010	16955819	-1.74782	6.2158	-8.70989	2.61065e-05	0.00138393	2.98757	NA
1011	16756078	0.695833	12.187	8.70951	2.61147e-05	0.00138393	2.98723	HSP90B1,MIR3652
1012	16853828	-0.729619	9.11617	-8.70906	2.61243e-05	0.00138393	2.98684	PPP4R1
1013	16767052	0.7537	10.8382	8.70801	2.6147e-05	0.00138393	2.98592	GNS
1014	16656827	0.848668	7.37169	8.70446	2.6224e-05	0.00138631	2.98278	NA
1015	16756895	-0.856176	5.76432	-8.70355	2.62436e-05	0.00138631	2.98199	IFT81
1016	17053019	-0.7195	9.79199	-8.70236	2.62695e-05	0.00138631	2.98093	CUL1
1017	17123268	0.840929	7.12853	8.69856	2.63522e-05	0.00138931	2.97758	TRANK1
1018	17045369	0.807376	7.05112	8.68851	2.65725e-05	0.00139954	2.9687	RALA
1019	17090957	1.33889	6.58261	8.68293	2.66958e-05	0.00140419	2.96376	COL5A1
1020	16734491	-0.91061	8.73693	-8.68215	2.6713e-05	0.00140419	2.96308	PHLDA2
1021	16828826	-0.851012	8.42301	-8.67857	2.67924e-05	0.00140591	2.95991	COTL1
1022	16818165	-0.770477	9.18457	-8.67773	2.68111e-05	0.00140591	2.95917	BCKDK
1023	16960807	0.828267	8.99788	8.67713	2.68244e-05	0.00140591	2.95864	CCNL1
1024	16810970	1.1882	9.59579	8.66925	2.70004e-05	0.00140979	2.95166	RPL4,SNORD18C,,SNORD18B
1025	16810971	1.1882	9.59579	8.66925	2.70004e-05	0.00140979	2.95166	NA
1026	16874339	-1.09032	8.59582	-8.66912	2.70035e-05	0.00140979	2.95154	RRAS
1027	16651335	0.767261	7.06195	8.66911	2.70037e-05	0.00140979	2.95153	NA
1028	16654687	0.928828	10.0712	8.65594	2.73007e-05	0.00142391	2.93986	NA
1029	17018256	0.774227	7.8877	8.65462	2.73306e-05	0.00142408	2.9387	CUTA
1030	16960752	0.808988	9.33486	8.6522	2.73857e-05	0.00142557	2.93655	,SLC33A1
1031	16810341	0.760388	10.3885	8.64176	2.76245e-05	0.00143406	2.92729	CA12
1032	16806702	0.844428	6.68415	8.64153	2.763e-05	0.00143406	2.92708	GOLGA8R,GOLGA8Q,GOLGA8O,GOLGA8N
1033	17107420	-1.67348	6.16889	-8.6404	2.76558e-05	0.00143406	2.92608	SPANXC,SPANXA1,SPANXA2,SPANXD
1034	17114718	-1.67348	6.16889	-8.6404	2.76558e-05	0.00143406	2.92608	SPANXC,SPANXA1,SPANXA2,SPANXD
1035	16764108	0.994526	10.0051	8.63624	2.77517e-05	0.00143765	2.92239	NA
1036	17054691	0.968267	5.84957	8.6311	2.78709e-05	0.00144243	2.91782	SDK1-AS1
1037	17117909	1.23985	6.53643	8.62555	2.80001e-05	0.00144772	2.91288	LINC01522,LINC00494
1038	17056992	0.752929	7.44482	8.62319	2.80553e-05	0.00144888	2.91078	GLI3
1039	17103993	-0.801207	9.09402	-8.62228	2.80766e-05	0.00144888	2.90997	TSR2
1040	16714944	0.718268	7.7137	8.61745	2.81898e-05	0.00145219	2.90568	PBLD
1041	17064724	-0.67644	9.14095	-8.61724	2.8195e-05	0.00145219	2.90548	PAXIP1
1042	16676764	0.706677	9.24965	8.61432	2.82636e-05	0.00145433	2.90289	CD55
1043	16854046	-0.801029	7.26703	-8.60748	2.84256e-05	0.00145574	2.89679	CEP76
1044	16768205	0.861132	7.19349	8.60515	2.84809e-05	0.00145574	2.89471	CEP290
1045	16677201	-0.683926	9.61389	-8.60399	2.85086e-05	0.00145574	2.89368	DTL
1046	17064459	-0.765875	9.467	-8.60384	2.85121e-05	0.00145574	2.89355	ABCF2-H2BE1,ABCF2
1047	17123264	1.06488	6.80637	8.60309	2.85299e-05	0.00145574	2.89288	TRANK1
1048	16726224	-0.702857	8.99883	-8.60256	2.85426e-05	0.00145574	2.8924	STIP1
1049	16801065	1.4055	7.6207	8.6024	2.85464e-05	0.00145574	2.89226	MIR4713HG
1050	16825794	-0.764218	10.2118	-8.60209	2.85539e-05	0.00145574	2.89198	DCTPP1
1051	16739132	0.702666	7.79644	8.60106	2.85784e-05	0.00145574	2.89107	FADS1
1052	16930534	-0.925843	9.80061	-8.6006	2.85894e-05	0.00145574	2.89066	EP300
1053	16653923	1.40523	9.24832	8.59945	2.86168e-05	0.00145574	2.88963	NA
1054	16654035	1.40523	9.24832	8.59945	2.86168e-05	0.00145574	2.88963	NA
1055	16696533	0.855019	9.00274	8.59558	2.87096e-05	0.00145907	2.88618	GAS5
1056	16766281	0.924425	11.3036	8.58051	2.90739e-05	0.00147619	2.87272	SNORD59A
1057	17106972	-0.998859	7.89617	-8.57563	2.91928e-05	0.00147989	2.86837	ARHGAP36
1058	16961308	0.804023	9.01952	8.57526	2.9202e-05	0.00147989	2.86803	GOLIM4
1059	16856699	-0.91123	8.03399	-8.57386	2.92362e-05	0.00148023	2.86678	DOT1L
1060	16811391	0.86916	8.87462	8.57218	2.92776e-05	0.00148069	2.86527	PARP6
1061	16901109	0.746858	9.55498	8.57124	2.93006e-05	0.00148069	2.86443	LONRF2
1062	16918918	-0.692417	11.5513	-8.5688	2.93606e-05	0.00148167	2.86225	NORAD
1063	16983172	-0.693017	10.8101	-8.5682	2.93753e-05	0.00148167	2.86172	CCT5
1064	16900802	0.745815	10.2603	8.55881	2.96076e-05	0.00149198	2.85331	TMEM131
1065	16979256	0.811713	9.25488	8.5511	2.97997e-05	0.00149956	2.84641	SEC24D
1066	16714880	1.8523	6.54941	8.55053	2.9814e-05	0.00149956	2.84589	DNAJC12
1067	16867915	0.924194	7.33964	8.54624	2.99217e-05	0.00150357	2.84204	INSR
1068	17003682	0.702524	9.52391	8.54425	2.99717e-05	0.00150468	2.84026	HNRNPH1
1069	16933006	-0.992759	7.16608	-8.53527	3.01988e-05	0.00151266	2.8322	LINC02557
1070	16948278	-0.712746	9.02437	-8.53415	3.02272e-05	0.00151266	2.8312	ACTL6A
1071	16656933	1.20129	7.0209	8.5335	3.02439e-05	0.00151266	2.83061	NA
1072	17121318	-0.795858	11.6128	-8.53275	3.02628e-05	0.00151266	2.82994	NA
1073	17066018	-1.02509	6.63534	-8.53122	3.03019e-05	0.00151266	2.82857	ZDHHC2
1074	17035880	-0.895684	5.11834	-8.52908	3.03564e-05	0.00151266	2.82665	HLA-DRA,
1075	17038596	-0.895684	5.11834	-8.52908	3.03564e-05	0.00151266	2.82665	HLA-DRA,
1076	17041225	-0.895684	5.11834	-8.52908	3.03564e-05	0.00151266	2.82665	HLA-DRA,
1077	16815914	-0.836087	7.74409	-8.52628	3.04282e-05	0.00151433	2.82413	SNN
1078	16758264	-0.981423	7.67621	-8.52556	3.04465e-05	0.00151433	2.82348	MLXIP
1079	16961758	-1.10044	5.11708	-8.51644	3.06812e-05	0.0015215	2.81529	KCNMB2-AS1
1080	17004333	-0.698079	7.64358	-8.51587	3.06961e-05	0.0015215	2.81477	BPHL
1081	17004337	-0.698079	7.64358	-8.51587	3.06961e-05	0.0015215	2.81477	BPHL
1082	17108959	-0.995398	7.17473	-8.51555	3.07042e-05	0.0015215	2.81448	ANOS1
1083	16667960	-1.1601	7.38862	-8.51406	3.07429e-05	0.00152202	2.81314	SLC25A24P1
1084	16839913	0.738691	8.63164	8.50978	3.08541e-05	0.00152611	2.80928	ZZEF1
1085	17066773	0.953186	5.99934	8.50079	3.10887e-05	0.00153504	2.8012
1086	16835639	2.4006	4.18537	8.50067	3.10919e-05	0.00153504	2.80109	NA
1087	16711426	-0.853533	7.63249	-8.4956	3.12253e-05	0.00154021	2.79651	ASB13
1088	17057149	0.777063	7.08632	8.48842	3.14153e-05	0.0015476	2.79004	POLM
1089	16770553	-0.819302	7.28883	-8.48724	3.14464e-05	0.0015476	2.78898	SLC8B1
1090	17010104	-1.71095	4.17682	-8.48636	3.14698e-05	0.0015476	2.78819	FAM135A
1091	17036486	0.977738	7.37264	8.48558	3.14907e-05	0.0015476	2.78748	HLA-C
1092	16773453	-0.82643	8.1614	-8.48116	3.16086e-05	0.00155198	2.78349	WASF3
1093	17056137	1.15988	6.43953	8.47928	3.16589e-05	0.00155302	2.78179	HOXA5
1094	17005573	0.943618	7.47777	8.47404	3.17993e-05	0.00155754	2.77706	H2BC5
1095	17124448	1.12852	5.37102	8.47369	3.1809e-05	0.00155754	2.77674	DPY19L2,DPY19L2P3,DPY19L1P1,DPY19L2P2
1096	16908037	-0.741833	8.6373	-8.47224	3.18479e-05	0.00155802	2.77543	FN1
1097	17057369	0.827021	8.56114	8.46781	3.19674e-05	0.00156244	2.77143	H2AZ2
1098	16994329	-0.739033	8.7472	-8.46164	3.2135e-05	0.0015679	2.76585	ATPSCKMT
1099	16666509	1.40757	4.28229	8.46154	3.21377e-05	0.0015679	2.76576	IFI44
1100	17039907	-0.994774	8.23464	-8.45574	3.22959e-05	0.00157296	2.76051	HLA-DRB3
1101	16712435	-0.690718	6.73808	-8.4556	3.23e-05	0.00157296	2.76038	MIR1915HG,MIR1915
1102	16858137	1.04693	6.87621	8.44572	3.25716e-05	0.00158406	2.75143	ICAM1
1103	16924305	-1.54398	5.38677	-8.44516	3.25871e-05	0.00158406	2.75093	BTG3
1104	16889664	0.732842	7.32627	8.44278	3.2653e-05	0.00158583	2.74877	CARF
1105	16704182	0.789785	8.17334	8.44149	3.26886e-05	0.00158612	2.7476	CSGALNACT2
1106	17017126	0.783111	8.66853	8.43833	3.27765e-05	0.00158895	2.74473	HLA-C
1107	16989955	0.758251	5.88739	8.43567	3.28505e-05	0.0015911	2.74232	PURA,IGIP
1108	16667303	0.662083	9.28339	8.43013	3.30054e-05	0.00159596	2.7373	ABCD3
1109	16854926	1.00545	7.87999	8.42996	3.30104e-05	0.00159596	2.73714	RNY4P37,ATP5F1A,SLC16A14,RNY4P19
1110	17082250	-0.709537	9.57628	-8.41868	3.33284e-05	0.00160988	2.7269	FAM83H
1111	17057378	0.751193	9.81925	8.41737	3.33656e-05	0.00161023	2.7257	PURB
1112	16654647	1.03939	11.9941	8.4147	3.34414e-05	0.00161223	2.72328	NA
1113	16752561	0.641283	8.15767	8.41379	3.34672e-05	0.00161223	2.72245	MYL6
1114	17064907	-1.08603	5.54495	-8.40978	3.35816e-05	0.00161629	2.71881	PTPRN2
1115	16761830	-1.14217	5.78249	-8.4051	3.37159e-05	0.00162129	2.71455	ERP27
1116	17119464	1.0096	8.64228	8.40079	3.38398e-05	0.00162482	2.71063	SNHG32,SNORD52
1117	16653765	0.939877	8.12887	8.40044	3.38499e-05	0.00162482	2.71031	NA
1118	16883088	0.685992	8.61677	8.39434	3.40265e-05	0.00163184	2.70475	CNNM3
1119	17064679	-0.733327	9.1189	-8.39116	3.41188e-05	0.00163481	2.70185	XRCC2
1120	16986203	0.675025	11.1149	8.3852	3.42927e-05	0.00164163	2.69642	HEXB
1121	16663797	1.49168	5.10557	8.3833	3.43484e-05	0.00164163	2.69469	NA
1122	16660757	-1.12586	6.78727	-8.38314	3.43531e-05	0.00164163	2.69454	GRHL3
1123	16920475	-0.83725	7.36556	-8.37846	3.44906e-05	0.00164408	2.69027	BCAS1
1124	16654661	1.38866	9.27004	8.3779	3.45071e-05	0.00164408	2.68976	NA
1125	16911632	1.35527	6.5246	8.37729	3.4525e-05	0.00164408	2.68921	PCSK2
1126	17115777	1.27011	7.01816	8.37722	3.4527e-05	0.00164408	2.68914	RAB39B
1127	16853523	-0.924107	9.23072	-8.37356	3.46354e-05	0.00164778	2.68579	CHORDC1P4
1128	16748675	-0.772632	8.8102	-8.36773	3.48083e-05	0.00165454	2.68047	H2AJ
1129	16836677	1.06732	7.9553	8.36561	3.48713e-05	0.00165606	2.67854
1130	16731654	-0.869362	6.04335	-8.3636	3.49314e-05	0.00165745	2.6767	TAGLN
1131	16710786	-0.72008	8.29774	-8.35571	3.5168e-05	0.0016672	2.66949	INPP5A
1132	16878284	1.00208	7.47051	8.35409	3.52169e-05	0.00166804	2.668	KRTCAP3
1133	16767142	0.731764	7.91118	8.35284	3.52545e-05	0.00166819	2.66686	TMBIM4
1134	16946513	0.934859	6.82987	8.35129	3.53013e-05	0.00166819	2.66544	TRPC1
1135	16745563	0.870357	6.03416	8.35089	3.53134e-05	0.00166819	2.66507	CLMP
1136	17028942	1.03944	6.30166	8.34457	3.5505e-05	0.00167577	2.65929	CDSN
1137	16852445	-0.794602	8.02716	-8.3432	3.55468e-05	0.00167627	2.65803	C18orf54
1138	16770789	-0.757608	9.76684	-8.34194	3.55852e-05	0.0016766	2.65688	C12orf49
1139	17097308	-0.776283	11.4925	-8.33719	3.57302e-05	0.00168195	2.65253	PTBP3
1140	16669700	-0.779222	9.64838	-8.33198	3.58904e-05	0.00168546	2.64775	SEC22B,SEC22B3P,SEC22B2P
1141	16743577	-0.856222	8.96504	-8.33001	3.59511e-05	0.00168546	2.64594	PGR
1142	16944055	0.787751	8.97312	8.32994	3.59532e-05	0.00168546	2.64588	SIDT1
1143	16847897	1.24838	6.89795	8.32991	3.5954e-05	0.00168546	2.64586	LRRC37A3
1144	16833698	-0.8728	10.8109	-8.32966	3.59618e-05	0.00168546	2.64563	PSMB3
1145	16703034	2.06411	5.93312	8.32545	3.60919e-05	0.00168883	2.64177
1146	16692611	-1.2355	6.87592	-8.32479	3.61125e-05	0.00168883	2.64116
1147	17097895	-0.708746	9.05868	-8.32428	3.61283e-05	0.00168883	2.64069	PSMD5
1148	16654641	0.953217	11.2462	8.31984	3.62661e-05	0.0016938	2.63662	NA
1149	16995333	-0.680096	6.86029	-8.31346	3.64654e-05	0.00170162	2.63076	NIPBL-DT
1150	16823561	-0.789734	9.05917	-8.31141	3.653e-05	0.00170315	2.62887	NMRAL1
1151	16816200	-0.867337	9.76593	-8.30912	3.66018e-05	0.00170339	2.62677	NDE1
1152	17113866	0.691887	9.8401	8.30879	3.66121e-05	0.00170339	2.62647	THOC2
1153	17121480	0.702516	6.17014	8.30727	3.66602e-05	0.00170339	2.62507	HERC2P8
1154	16853399	-1.32761	5.02083	-8.30709	3.66658e-05	0.00170339	2.6249	COLEC12
1155	16860221	-0.776293	6.15638	-8.3062	3.66938e-05	0.00170339	2.62409	ZNF257
1156	17114707	0.853675	11.2542	8.30324	3.67873e-05	0.00170625	2.62136	LDOC1
1157	16757255	-0.679658	10.8248	-8.30151	3.68422e-05	0.00170732	2.61977	PTPN11
1158	17120344	1.17941	5.52929	8.29953	3.6905e-05	0.00170875	2.61795	MALRD1
1159	17096516	-0.83163	6.54949	-8.29554	3.70319e-05	0.00171315	2.61428	ANKS6
1160	17018335	-1.54086	6.72343	-8.28457	3.73835e-05	0.00172792	2.60418	LINC01016
1161	16933795	-0.856806	6.85687	-8.28307	3.74319e-05	0.00172867	2.60279	TBC1D10A
1162	17122920	-0.718344	7.15538	-8.27896	3.75649e-05	0.00173332	2.599	,PIK3CA
1163	16796094	0.746959	9.15862	8.27618	3.76551e-05	0.00173575	2.59644	ITPK1
1164	17124988	-0.778875	10.9968	-8.27484	3.76985e-05	0.00173575	2.5952	TPM4,
1165	17118652	0.858189	7.15933	8.27434	3.77147e-05	0.00173575	2.59474	RPS8,SNORD38A
1166	16888999	1.09062	5.2977	8.26219	3.81125e-05	0.00175255	2.58352	PCGEM1
1167	16826606	0.934269	8.54515	8.26078	3.81589e-05	0.00175318	2.58222	CRNDE
1168	17118662	0.805453	8.34047	8.25459	3.83634e-05	0.0017597	2.57651	RABGGTB,SNORD45C
1169	17125158	0.764008	8.04952	8.2545	3.83664e-05	0.0017597	2.57642	LINC00963
1170	17056621	1.19893	5.38029	8.2511	3.84794e-05	0.00176338	2.57328	DPY19L2P1
1171	16698556	0.992679	9.12681	8.24803	3.85817e-05	0.00176656	2.57044	SLC41A1
1172	17063461	0.780185	9.49473	8.24594	3.86516e-05	0.00176824	2.5685	HIPK2
1173	16760028	-1.15183	8.81508	-8.24399	3.87169e-05	0.00176972	2.5667
1174	17076063	-0.782103	10.1905	-8.23868	3.88951e-05	0.00177253	2.56179	GSR
1175	17121594	1.24628	6.6818	8.23844	3.89031e-05	0.00177253	2.56157	CCDC144A,,CCDC144B,CCDC144CP
1176	17122484	0.962779	5.07178	8.23834	3.89065e-05	0.00177253	2.56147	MIR4435-2HG
1177	16738429	-0.676265	10.0446	-8.23781	3.89245e-05	0.00177253	2.56098	SSRP1
1178	17062878	-0.702425	7.2007	-8.23724	3.89437e-05	0.00177253	2.56045	CEP41
1179	16813883	0.830764	7.01045	8.23353	3.90689e-05	0.00177673	2.55702	SELENOS
1180	17020317	0.784363	8.89208	8.23186	3.91257e-05	0.0017778	2.55546	DST
1181	17082507	-0.753881	7.97097	-8.22988	3.91928e-05	0.00177934	2.55363	BOP1
1182	17008706	0.781165	9.72742	8.22853	3.92385e-05	0.00177991	2.55239	CNPY3
1183	16876978	0.840352	6.78731	8.22351	3.94098e-05	0.00178604	2.54773	GRHL1
1184	16831306	-0.935686	5.81186	-8.22261	3.94404e-05	0.00178604	2.54689	HS3ST3B1
1185	17090190	-0.954857	8.30853	-8.2198	3.95368e-05	0.0017889	2.54428	NCS1
1186	16825097	-0.730867	10.0059	-8.21594	3.96692e-05	0.00179337	2.54071	NDUFAB1
1187	16796694	0.758021	7.71795	8.21094	3.98417e-05	0.00179956	2.53607	WARS1
1188	17121832	0.950126	7.6264	8.21004	3.9873e-05	0.00179956	2.53522	NA
1189	17045708	0.659933	7.87686	8.20825	3.99349e-05	0.00180083	2.53357	ZMIZ2
1190	16736821	1.03626	8.11525	8.20383	4.00885e-05	0.00180624	2.52946	LGR4
1191	16994672	1.27597	5.3847	8.20176	4.01608e-05	0.0018071	2.52753	BASP1-AS1
1192	16810329	1.20352	6.80383	8.20055	4.0203e-05	0.0018071	2.52641	RPS27L
1193	17057284	0.901109	6.83528	8.20039	4.02086e-05	0.0018071	2.52626	NA
1194	16745139	0.775665	7.5016	8.19677	4.03352e-05	0.00180976	2.5229	CCDC84-DT
1195	16656593	0.966172	7.89901	8.19677	4.03353e-05	0.00180976	2.52289	NA
1196	17121778	1.06669	3.8275	8.19566	4.03741e-05	0.00180998	2.52186	LINC00910
1197	16722299	-0.842668	7.63304	-8.19277	4.0476e-05	0.00181303	2.51917	PDE3B
1198	17095918	-0.810331	8.41436	-8.18735	4.06672e-05	0.00182008	2.51413	IPPK
1199	17104082	-0.757274	8.34284	-8.18618	4.07086e-05	0.00182041	2.51304	APEX2
1200	16732676	-0.813265	5.61335	-8.1838	4.07931e-05	0.00182248	2.51082	UBASH3B
1201	16987986	0.770243	7.89715	8.18296	4.0823e-05	0.00182248	2.51004	EPB41L4A-AS1,SNORA13
1202	16812997	0.848233	8.22377	8.18086	4.08977e-05	0.0018243	2.50808	,DET1
1203	16975084	-0.732837	6.65389	-8.17819	4.09929e-05	0.00182638	2.50559	ARAP2
1204	17113980	0.808261	4.91869	8.17733	4.10234e-05	0.00182638	2.5048	SMARCA1
1205	16673899	0.653878	9.61936	8.17668	4.10465e-05	0.00182638	2.50419	SUCO
1206	17045354	1.24198	7.51189	8.17077	4.12584e-05	0.00183238	2.49868	YAE1
1207	17122230	-0.819412	9.13596	-8.17076	4.12589e-05	0.00183238	2.49867	IGSF3,
1208	16771962	-0.699108	10.2847	-8.17007	4.12838e-05	0.00183238	2.49803	SBNO1
1209	16802795	0.739441	10.3868	8.16524	4.1458e-05	0.00183757	2.49352	NEO1
1210	16813189	1.02321	7.62443	8.16493	4.14693e-05	0.00183757	2.49323	PEX11A
1211	17125722	-1.37114	6.19168	-8.16179	4.15831e-05	0.00184109	2.4903	ANOS1,ANOS2P
1212	16785869	0.696052	9.57046	8.15809	4.17172e-05	0.0018455	2.48685	SRSF5
1213	16885859	1.83304	4.9793	8.14952	4.20307e-05	0.00185784	2.47884	NCKAP5-AS2
1214	16731918	1.18758	6.54175	8.14701	4.21231e-05	0.00186039	2.47649	TMEM25
1215	16868053	-0.648015	10.1272	-8.1401	4.2378e-05	0.00187011	2.47003	ELAVL1
1216	16941114	-0.861186	5.4285	-8.13884	4.24246e-05	0.00187063	2.46886	DOCK3
1217	17047504	-0.657908	13.4302	-8.13701	4.24926e-05	0.00187208	2.46714	HSPB1
1218	16908782	-0.725582	9.10156	-8.13471	4.25782e-05	0.00187432	2.46499	DNPEP
1219	16869596	-0.840137	9.5417	-8.13314	4.2637e-05	0.00187536	2.46351	ADGRL1
1220	17044201	-0.777332	6.67512	-8.12621	4.28962e-05	0.00188522	2.45703	KLHL7
1221	17086634	-1.04934	9.90966	-8.12261	4.30318e-05	0.00188963	2.45365	CKS2
1222	16857467	-0.641532	7.89125	-8.11869	4.31796e-05	0.00189457	2.44998	TRIP10
1223	16945854	0.643975	10.5448	8.11025	4.35004e-05	0.00190708	2.44206	CDV3
1224	16937741	-1.59288	5.86445	-8.10871	4.3559e-05	0.00190809	2.44061	PPARG
1225	16746808	-0.653717	10.0713	-8.10449	4.37205e-05	0.0019136	2.43665	FKBP4
1226	16740867	-0.974598	6.73951	-8.09791	4.39736e-05	0.00192266	2.43047	SPTBN2
1227	16751997	1.03333	10.0921	8.09725	4.39992e-05	0.00192266	2.42985	NA
1228	16770142	-0.673273	9.47039	-8.09498	4.4087e-05	0.00192493	2.42772	PPP1CC
1229	17045001	0.997292	7.80616	8.09121	4.42331e-05	0.00192974	2.42418	LINC00997
1230	17118802	0.779346	9.47833	8.08765	4.43717e-05	0.00193421	2.42083	RPS3,SNORD15A
1231	16732248	0.720968	6.55267	8.08668	4.44099e-05	0.0019343	2.41991	NLRX1
1232	16980051	1.97402	5.82934	8.08191	4.45962e-05	0.00194084	2.41543	CLGN
1233	16688210	1.65643	5.63086	8.08001	4.46711e-05	0.00194252	2.41363	MIR3671,MIR101-1
1234	16991839	0.739056	8.59548	8.07626	4.48187e-05	0.00194686	2.4101	CCNG1
1235	17122454	0.968483	10.594	8.07563	4.48435e-05	0.00194686	2.4095	ANKRD36C,ANKRD36,ANKRD36B
1236	16867047	-0.796852	9.09156	-8.0722	4.49791e-05	0.00195117	2.40627	TLE5
1237	16766499	0.658219	9.38445	8.06609	4.52215e-05	0.0019601	2.40052	R3HDM2
1238	16912379	-0.636417	10.9402	-8.05309	4.57428e-05	0.00198109	2.38825	TPX2
1239	16771624	-1.01577	5.8162	-8.05142	4.581e-05	0.0019824	2.38667
1240	16805151	0.859012	4.88811	8.04806	4.59461e-05	0.00198669	2.3835
1241	16821296	-0.763057	9.09804	-8.04672	4.60004e-05	0.00198716	2.38224	CMIP
1242	17087933	-0.669417	11.0468	-8.04597	4.60311e-05	0.00198716	2.38152	RAD23B
1243	17114745	-1.06409	5.9177	-8.04485	4.60764e-05	0.00198751	2.38047	SLITRK4
1244	16824004	-0.724442	10.2517	-8.0319	4.66063e-05	0.00200849	2.36822	GSPT1
1245	16714798	0.677596	8.97021	8.03114	4.66377e-05	0.00200849	2.3675	JMJD1C
1246	16839220	-0.802192	6.57402	-8.02658	4.68262e-05	0.00201499	2.36318	RFLNB
1247	16826718	0.676029	8.30077	8.02101	4.70575e-05	0.00202332	2.35791	BBS2
1248	16843511	0.754501	6.28954	8.014	4.73503e-05	0.00203428	2.35126	CCL5
1249	16983674	-0.751503	9.57533	-8.01295	4.73943e-05	0.00203454	2.35027	C5orf22
1250	16677913	0.713123	8.4246	8.00581	4.76948e-05	0.00204578	2.3435	DEGS1
1251	16844509	-1.20929	5.95778	-8.00493	4.77323e-05	0.00204578	2.34266	KRT23
1252	16689042	0.791916	8.83809	8.00266	4.78281e-05	0.00204824	2.34051	SYDE2
1253	16669288	-0.682583	9.05879	-7.99891	4.79875e-05	0.00205117	2.33695	WDR3
1254	17104983	-0.633578	8.62578	-7.9979	4.80304e-05	0.00205117	2.33599	PBDC1
1255	16792285	1.84592	5.98532	7.99608	4.8108e-05	0.00205117	2.33426	NA
1256	17122644	1.29974	6.15042	7.99576	4.81217e-05	0.00205117	2.33396	MIR4435-2HG
1257	16763540	0.633258	12.9794	7.99556	4.81303e-05	0.00205117	2.33376	SLC38A2
1258	16811312	0.746143	9.19134	7.99447	4.8177e-05	0.00205117	2.33273	MYO9A
1259	16707149	0.826529	6.95298	7.99417	4.81895e-05	0.00205117	2.33245	FAS
1260	17071584	-0.814845	10.0788	-7.99387	4.82026e-05	0.00205117	2.33216	ATP6V1C1
1261	16955800	-1.02659	6.94601	-7.99162	4.82989e-05	0.00205364	2.33002	PRICKLE2
1262	16702374	1.52688	8.57794	7.98705	4.84951e-05	0.00206035	2.32568	LINC02676
1263	17019877	1.37366	5.46187	7.98277	4.86797e-05	0.00206655	2.32161	CRISP3
1264	16771512	-0.659224	9.33683	-7.98025	4.87889e-05	0.00206955	2.31921	NA
1265	17021922	0.788623	9.2558	7.97695	4.8932e-05	0.00207304	2.31607	PNISR
1266	17077826	0.702379	8.6917	7.97657	4.89485e-05	0.00207304	2.31571	MYBL1
1267	16831550	1.29503	7.06442	7.97227	4.91362e-05	0.00207935	2.31161	FAM106C,FAM106A,USP32P3,
1268	17063996	-1.02898	7.05381	-7.97052	4.92125e-05	0.00208094	2.30995	ARHGEF35
1269	16668785	1.31166	6.31887	7.96913	4.92734e-05	0.00208187	2.30862	WNT2B
1270	16814389	0.726911	6.71472	7.96368	4.95128e-05	0.00209034	2.30343	WDR90
1271	17029003	0.784613	9.09453	7.96134	4.96163e-05	0.00209306	2.30119	HLA-C
1272	17016390	0.718489	8.57416	7.9583	4.97505e-05	0.00209707	2.2983	H2BC8
1273	16821541	1.02117	6.90071	7.95702	4.98074e-05	0.00209782	2.29708	CRISPLD2
1274	16990261	-0.760697	9.07402	-7.95299	4.99867e-05	0.00210372	2.29323	PCDHB3
1275	17021382	0.721247	5.95192	7.9485	5.0187e-05	0.00210762	2.28894	NA
1276	17124446	1.31771	4.42347	7.94784	5.02165e-05	0.00210762	2.28831	DPY19L2P3
1277	16768675	-0.7631	6.94614	-7.94708	5.02504e-05	0.00210762	2.28759	FGD6
1278	16837065	0.721188	9.65225	7.94688	5.02593e-05	0.00210762	2.2874	CEP95
1279	16664620	0.729034	7.1146	7.94651	5.02759e-05	0.00210762	2.28705	EPS15-AS1
1280	16974280	-0.634468	8.55382	-7.94507	5.03404e-05	0.00210867	2.28567	WDR1
1281	16752132	-0.932832	8.03412	-7.93543	5.07751e-05	0.00212374	2.27646	MUCL1
1282	17024753	-0.677297	10.0842	-7.93463	5.08116e-05	0.00212374	2.27569	RMND1
1283	16906509	0.908437	6.42438	7.93447	5.08189e-05	0.00212374	2.27554	NEMP2
1284	16903090	-0.656449	9.69744	-7.93189	5.09357e-05	0.00212696	2.27308	MCM6
1285	16987673	0.872167	8.1129	7.92645	5.11841e-05	0.00213567	2.26786	PAM
1286	16877451	1.13923	5.56435	7.92012	5.14742e-05	0.00214315	2.26181	NA
1287	16850437	-0.69745	10.7051	-7.92007	5.14765e-05	0.00214315	2.26176	USP14
1288	16786941	-0.638894	8.47246	-7.91982	5.14879e-05	0.00214315	2.26152	AHSA1
1289	17085432	1.02747	8.11959	7.91906	5.15232e-05	0.00214315	2.26079
1290	17122804	1.27072	4.41197	7.91631	5.16498e-05	0.00214675	2.25816	MIR646HG
1291	16686557	0.605128	8.27799	7.91523	5.17e-05	0.00214717	2.25712	PIK3R3,
1292	16900525	0.724392	11.5776	7.91192	5.18531e-05	0.00215186	2.25395	NA
1293	16652891	0.848667	7.62852	7.90802	5.20345e-05	0.00215772	2.25021	NA
1294	16815289	-0.904517	9.11472	-7.90607	5.21252e-05	0.00215981	2.24834	PAQR4
1295	16654679	1.24413	9.38091	7.90106	5.23596e-05	0.00216785	2.24353	NA
1296	17098411	0.6665	12.3594	7.89906	5.24533e-05	0.00217005	2.24162	HSPA5
1297	17122922	-0.625077	8.79246	-7.89799	5.25035e-05	0.00217046	2.24059	,PIK3CA
1298	17012963	-0.687333	8.58454	-7.89663	5.25677e-05	0.00217144	2.23928	ARFGEF3
1299	16674292	-0.668619	8.93081	-7.89308	5.2735e-05	0.00217667	2.23588	RALGPS2
1300	16835447	0.683808	7.37577	7.88981	5.28901e-05	0.00218139	2.23273	CALCOCO2
1301	16809596	-0.716533	7.12273	-7.88581	5.30799e-05	0.00218366	2.22889	RAB27A
1302	16767911	0.728556	7.69811	7.88565	5.30874e-05	0.00218366	2.22874	PAWR
1303	16880063	0.687071	9.90992	7.88526	5.3106e-05	0.00218366	2.22837	ERLEC1
1304	16959007	0.741269	8.27285	7.88522	5.31079e-05	0.00218366	2.22833	PLXND1
1305	16667662	-0.83356	7.14289	-7.88358	5.31863e-05	0.00218448	2.22675	CDC14A
1306	17092579	0.903303	6.569	7.8831	5.32094e-05	0.00218448	2.22628	TTC39B
1307	17071144	-0.978411	6.34408	-7.86959	5.38583e-05	0.00220913	2.21329	SDC2
1308	16918244	-0.684864	8.04365	-7.86889	5.38923e-05	0.00220913	2.21261	BCL2L1
1309	16985491	1.04646	3.79119	7.86678	5.39946e-05	0.00221163	2.21058	MAST4-IT1
1310	17052937	-0.940988	6.59868	-7.86456	5.41027e-05	0.00221399	2.20844	OR2A1,
1311	16823103	-0.95849	9.43463	-7.86337	5.41604e-05	0.00221399	2.20729	NA
1312	16878731	-1.04193	6.40125	-7.86305	5.4176e-05	0.00221399	2.20699	EHD3
1313	16944695	0.859502	7.33645	7.85969	5.43396e-05	0.00221737	2.20375	PARP14
1314	17075776	-0.800516	8.9862	-7.85966	5.43413e-05	0.00221737	2.20372	PBK
1315	16654653	0.806892	12.4119	7.85752	5.44462e-05	0.00221845	2.20165	NA
1316	16655667	-1.09099	4.98603	-7.85743	5.44506e-05	0.00221845	2.20157	NA
1317	16873647	-0.709707	9.81319	-7.85382	5.46274e-05	0.00222236	2.19809	AP2S1
1318	16963845	0.75638	7.87568	7.85378	5.46296e-05	0.00222236	2.19805	IDUA
1319	16823197	-0.846905	9.72096	-7.84987	5.4822e-05	0.0022285	2.19428	NA
1320	17013567	-0.677424	7.96119	-7.84552	5.50373e-05	0.00223468	2.19008	TAB2
1321	16662664	0.739258	8.49099	7.84511	5.50574e-05	0.00223468	2.18969	MANEAL
1322	16821294	-0.902733	5.74914	-7.84203	5.52106e-05	0.00223627	2.18671	GAN,MIR4720
1323	16916958	-0.724413	9.98029	-7.84191	5.52163e-05	0.00223627	2.1866	PCNA
1324	16763600	0.825079	8.11291	7.84162	5.52309e-05	0.00223627	2.18632	AMIGO2
1325	17044773	0.872703	6.77432	7.84044	5.52894e-05	0.00223627	2.18518	NA
1326	16738736	-0.684368	9.90472	-7.84013	5.53051e-05	0.00223627	2.18488	PATL1
1327	16863322	0.650392	6.67113	7.83479	5.5572e-05	0.00224537	2.17972	EML2-AS1
1328	16763848	0.913407	3.99502	7.83294	5.56648e-05	0.00224742	2.17793
1329	16760668	0.689013	9.83268	7.83012	5.58066e-05	0.00225145	2.1752	LPCAT3
1330	16664624	0.623114	7.78695	7.82769	5.59288e-05	0.00225469	2.17286	OSBPL9
1331	16859205	1.82862	5.76196	7.82398	5.61164e-05	0.00226055	2.16927	UCA1,
1332	16755525	0.926278	8.91227	7.82039	5.62988e-05	0.00226484	2.16579	NA
1333	16901161	0.780186	6.30555	7.82015	5.63106e-05	0.00226484	2.16556	TBC1D8
1334	16675698	-0.813754	6.55931	-7.81939	5.63496e-05	0.00226484	2.16482	INAVA
1335	16875200	0.671211	7.96961	7.8135	5.66502e-05	0.00227363	2.15912
1336	17080450	0.719165	8.46329	7.81344	5.66532e-05	0.00227363	2.15906	EXT1
1337	16823100	-0.748933	12.4509	-7.8102	5.6819e-05	0.00227827	2.15593	NA
1338	16834766	0.692458	12.1967	7.80953	5.68536e-05	0.00227827	2.15527	GRN
1339	16837061	0.837008	10.509	7.80601	5.7035e-05	0.00228383	2.15186	SNORD104
1340	16807098	1.16644	5.83361	7.80441	5.71174e-05	0.00228542	2.15031	MIR3942
1341	16866686	-1.27457	7.24824	-7.80303	5.71885e-05	0.00228614	2.14898	ADAMTSL5
1342	16654659	0.924408	11.3555	7.8016	5.72626e-05	0.00228614	2.14759	NA
1343	16919022	-0.623009	8.27992	-7.80159	5.72634e-05	0.00228614	2.14757	SAMHD1
1344	16919879	-1.16638	6.32443	-7.79839	5.74292e-05	0.00229106	2.14447	SLC13A3
1345	17006134	0.864533	4.34565	7.79506	5.76025e-05	0.00229626	2.14124	HLA-H
1346	16656767	1.61285	5.23066	7.79229	5.77474e-05	0.00229894	2.13855	NA
1347	16654563	1.07455	6.84204	7.79214	5.77554e-05	0.00229894	2.1384	NA
1348	16836232	0.764908	7.73985	7.78688	5.8031e-05	0.00230819	2.1333	STXBP4
1349	16987565	0.668253	9.80944	7.78479	5.81407e-05	0.00231078	2.13127	LNPEP
1350	16809532	-1.02587	6.09007	-7.78348	5.82101e-05	0.00231078	2.12999	ONECUT1
1351	17016038	-1.31236	5.79128	-7.78319	5.82253e-05	0.00231078	2.12971	LNC-LBCS
1352	16801122	-0.650377	5.53446	-7.78121	5.83301e-05	0.00231323	2.12779	TMOD2
1353	16833476	-0.726901	7.2775	-7.7746	5.86808e-05	0.0023231	2.12136	DHRS11
1354	16690427	-0.71639	8.67125	-7.77408	5.87083e-05	0.0023231	2.12086	HENMT1
1355	16803973	0.741712	7.49645	7.77406	5.87091e-05	0.0023231	2.12084	GOLGA6L10,GOLGA6L9,GOLGA6L3
1356	16803217	0.901167	6.228	7.77156	5.88424e-05	0.00232666	2.11841
1357	16690843	-0.640968	8.46097	-7.7697	5.89421e-05	0.00232889	2.11659	WDR77
1358	17112339	-0.631037	9.51194	-7.76881	5.89898e-05	0.00232905	2.11573	TAF9B
1359	16771652	-0.738091	7.5176	-7.76525	5.91803e-05	0.00233449	2.11227	VPS33A
1360	16770507	-0.616304	9.49564	-7.76462	5.92146e-05	0.00233449	2.11165	DDX54
1361	16772004	-0.724466	7.47049	-7.76246	5.93308e-05	0.00233676	2.10954	RILPL1
1362	17006222	0.661825	8.27183	7.76193	5.93593e-05	0.00233676	2.10903	HLA-L
1363	16855682	2.58921	4.50875	7.76059	5.94314e-05	0.00233788	2.10773	NA
1364	16671707	-0.736327	7.25155	-7.75916	5.95088e-05	0.00233867	2.10633	MTX1
1365	16886757	0.607706	9.60259	7.75861	5.95386e-05	0.00233867	2.1058	PKP4
1366	16993431	0.61985	12.4177	7.7566	5.96476e-05	0.00234123	2.10383	NA
1367	16888578	0.770378	7.07555	7.74992	6.00105e-05	0.00235376	2.09733	GULP1
1368	16912871	-0.629248	10.1756	-7.74491	6.02851e-05	0.0023628	2.09243	CHMP4B
1369	17067170	-0.786937	9.76126	-7.74319	6.03795e-05	0.00236458	2.09075	BNIP3L
1370	16848755	-0.690008	10.9534	-7.74247	6.04188e-05	0.00236458	2.09006	SUMO2P17,SUMO2
1371	17120790	0.918907	3.8761	7.73814	6.06572e-05	0.00237117	2.08583	A2MP1
1372	16759324	-0.645893	7.31898	-7.73781	6.06757e-05	0.00237117	2.08551	MMP17
1373	16655575	1.48777	4.63955	7.73489	6.08375e-05	0.00237552	2.08265	NA
1374	17007620	-0.725719	9.06203	-7.7342	6.08754e-05	0.00237552	2.08198	HMGA1
1375	16761789	-0.858951	9.0283	-7.73061	6.10751e-05	0.00238157	2.07847	WBP11
1376	16735826	1.53729	7.39651	7.72636	6.13119e-05	0.00238907	2.07432	NA
1377	17044997	1.37777	7.78768	7.72479	6.13999e-05	0.0023891	2.07278	ZNRF2P1
1378	17086208	-1.16322	6.80764	-7.72475	6.14018e-05	0.0023891	2.07275	NA
1379	16834111	0.930319	6.04645	7.72281	6.15107e-05	0.00239074	2.07085	TMEM99
1380	16914745	0.667488	10.1972	7.72241	6.15331e-05	0.00239074	2.07046	ZFAS1,SNORD12B,,SNORD12
1381	16812406	1.05711	7.53447	7.72109	6.16072e-05	0.00239188	2.06917	STARD5
1382	16795819	-1.06446	6.60884	-7.71994	6.16719e-05	0.00239266	2.06804	GPR68
1383	16935690	0.908863	6.98667	7.71779	6.17928e-05	0.00239414	2.06594	A4GALT
1384	16933502	-0.704792	6.9926	-7.71768	6.17992e-05	0.00239414	2.06583	CHEK2
1385	17017185	0.901228	10.3448	7.71505	6.19475e-05	0.00239656	2.06326	NA
1386	16748683	-1.23256	5.60375	-7.71353	6.20339e-05	0.00239656	2.06176	NA
1387	17022623	0.696226	9.49967	7.71345	6.20383e-05	0.00239656	2.06169	REV3L
1388	16756431	-0.639895	7.3561	-7.71341	6.20404e-05	0.00239656	2.06165	TMEM263
1389	16815001	-0.666938	10.0096	-7.71149	6.21493e-05	0.00239903	2.05977	TRAF7
1390	17121400	-0.619392	11.3217	-7.70778	6.23601e-05	0.00240374	2.05614
1391	16943763	-0.671633	5.92307	-7.70605	6.24591e-05	0.00240374	2.05444	NA
1392	16777384	-0.864979	7.89232	-7.70581	6.24728e-05	0.00240374	2.0542	SACS
1393	16758650	-0.668847	8.23991	-7.70577	6.24751e-05	0.00240374	2.05416	GTF2H3
1394	16852331	-0.71544	7.93653	-7.70541	6.24954e-05	0.00240374	2.05381	ME2
1395	17057066	0.787545	7.76988	7.70252	6.26604e-05	0.00240836	2.05098	COA1
1396	17125030	0.731331	5.42833	7.69706	6.29744e-05	0.00241531	2.04562	ASNSP1
1397	16917434	-1.24423	4.69737	-7.69651	6.30056e-05	0.00241531	2.04509	NA
1398	17075731	0.815555	8.0153	7.69567	6.30542e-05	0.00241531	2.04426	CLU
1399	17112376	0.762501	7.63952	7.69554	6.30615e-05	0.00241531	2.04414	BRWD3
1400	16752017	1.49508	9.47503	7.69494	6.30961e-05	0.00241531	2.04355	NA
1401	16961974	-0.715298	9.98122	-7.69468	6.31116e-05	0.00241531	2.04329	DCUN1D1
1402	16993403	0.837425	11.7521	7.69263	6.323e-05	0.00241706	2.04128	NA
1403	16963174	-0.615185	6.9727	-7.69233	6.32474e-05	0.00241706	2.04098	TNK2
1404	16930093	-0.696599	8.371	-7.68683	6.35664e-05	0.00242752	2.03558	TOMM22
1405	16771572	-1.38902	9.03979	-7.68012	6.39578e-05	0.00244073	2.029	NA
1406	17054074	-0.744322	8.0137	-7.67887	6.40312e-05	0.00244179	2.02777	NA
1407	16688164	0.622143	10.3129	7.6773	6.41233e-05	0.00244357	2.02623	JAK1
1408	16970906	1.31032	6.52645	7.67217	6.44257e-05	0.00245074	2.02118	MGST2
1409	16852718	0.905627	5.57738	7.67095	6.44978e-05	0.00245074	2.01998	NA
1410	16888963	0.784398	6.97408	7.67081	6.45059e-05	0.00245074	2.01985	NABP1
1411	16802162	0.698863	8.69909	7.67079	6.45073e-05	0.00245074	2.01982	DIS3L
1412	16992462	0.772624	7.64626	7.67024	6.454e-05	0.00245074	2.01928	NA
1413	16942692	-1.08704	6.48748	-7.66779	6.4685e-05	0.0024545	2.01687	LINC02005
1414	16772493	-1.10654	7.4469	-7.66558	6.48159e-05	0.00245773	2.0147	STX2
1415	17100350	-0.93009	8.01434	-7.6642	6.4898e-05	0.00245911	2.01334	LRRC26,,MIR3621
1416	16774130	0.660142	10.6882	7.66266	6.49899e-05	0.0024595	2.01182	FREM2
1417	16823750	-0.841251	8.71075	-7.66249	6.50001e-05	0.0024595	2.01166	CARHSP1
1418	16700911	1.67272	5.74557	7.65906	6.5205e-05	0.00246551	2.00828	ERO1B
1419	17061958	0.885258	8.71957	7.65294	6.55725e-05	0.00247284	2.00225	TMEM168
1420	16935767	-0.721562	7.72599	-7.65285	6.55781e-05	0.00247284	2.00216	MCAT
1421	17057433	0.764003	8.02645	7.65157	6.56551e-05	0.00247284	2.0009	TBRG4
1422	16868035	-0.924738	7.80003	-7.6515	6.56594e-05	0.00247284	2.00083	CTXN1
1423	16668102	-0.639526	8.83987	-7.6513	6.56712e-05	0.00247284	2.00064	TMEM167B
1424	17056285	0.759669	6.37257	7.65062	6.57123e-05	0.00247284	1.99996	NA
1425	16655897	1.13684	5.12644	7.65047	6.57215e-05	0.00247284	1.99981	NA
1426	17075460	0.827715	6.88452	7.64946	6.57825e-05	0.00247339	1.99882	TNFRSF10A
1427	17093829	0.654644	7.45341	7.64643	6.59658e-05	0.00247855	1.99583	GBA2
1428	17048563	-1.01434	6.18224	-7.64121	6.62831e-05	0.00248872	1.99069	PEG10
1429	16771317	-0.680692	10.6046	-7.63853	6.64471e-05	0.00249314	1.98803	NA
1430	16984032	-0.628383	9.41613	-7.63738	6.6517e-05	0.00249381	1.98691	SKP2
1431	16803926	0.70212	7.64977	7.63596	6.66038e-05	0.00249381	1.98551	UBE2Q2P2
1432	16771443	-0.798972	8.76034	-7.63595	6.66044e-05	0.00249381	1.9855	NA
1433	16653341	0.794567	8.04907	7.63404	6.6722e-05	0.00249472	1.9836	NA
1434	16653443	0.794567	8.04907	7.63404	6.6722e-05	0.00249472	1.9836	NA
1435	16732419	1.09225	7.21048	7.62697	6.71575e-05	0.00250926	1.97662	TLCD5
1436	16962105	-0.8603	7.16752	-7.61964	6.76127e-05	0.00252282	1.96937	,MAP6D1
1437	16803628	0.72855	7.55008	7.61924	6.76374e-05	0.00252282	1.96898	TMED3
1438	16764620	0.64941	8.72873	7.61879	6.76654e-05	0.00252282	1.96854	SLC11A2
1439	16838412	1.18678	5.93051	7.6181	6.77088e-05	0.00252282	1.96785
1440	16676461	0.597323	6.55875	7.61208	6.80853e-05	0.00253509	1.9619	CDK18
1441	17043822	0.638615	8.778	7.61049	6.81854e-05	0.00253705	1.96032	BZW2
1442	16803743	-0.717208	9.19754	-7.60354	6.86242e-05	0.0025507	1.95344	ABHD17C
1443	16930066	-0.676715	7.63323	-7.60318	6.86472e-05	0.0025507	1.95308	KDELR3
1444	16699533	-0.890238	6.45036	-7.59725	6.90238e-05	0.00256248	1.94721	DUSP10
1445	16758874	-0.834	9.29811	-7.59597	6.91058e-05	0.00256248	1.94593	NA
1446	16939439	-1.20938	5.97555	-7.59594	6.91076e-05	0.00256248	1.9459	MYRIP
1447	16949537	-0.73442	5.92843	-7.59484	6.91781e-05	0.00256332	1.94481	TP63
1448	16897026	-0.628807	9.72835	-7.59202	6.93587e-05	0.00256824	1.94201	ZFP36L2,THADA
1449	17112596	-1.2991	5.65933	-7.59078	6.94379e-05	0.00256939	1.94079	PCDH19
1450	16889411	0.713048	6.90996	7.5894	6.95269e-05	0.00257091	1.93941	CFLAR
1451	16955795	-0.947408	4.83471	-7.58797	6.96185e-05	0.00257253	1.938	LINC00994
1452	16851309	-0.82544	7.71379	-7.58584	6.97558e-05	0.00257582	1.93588	GREB1L
1453	16810376	0.781725	8.72695	7.58264	6.99626e-05	0.00258032	1.93271	HERC1
1454	17125684	0.695175	7.44608	7.58247	6.99739e-05	0.00258032	1.93253	,LINC00893,LINC00894
1455	17122654	1.71827	5.77926	7.57644	7.03654e-05	0.00259298	1.92655	CYTOR,MIR4435-2HG
1456	16882615	0.858761	6.8913	7.57437	7.05001e-05	0.00259547	1.92449	THNSL2
1457	16919508	-0.712618	8.2753	-7.57392	7.05299e-05	0.00259547	1.92404	TOMM34
1458	16916233	-0.822297	6.32553	-7.57096	7.0723e-05	0.00260045	1.92111	MYT1,
1459	16769649	-0.61797	8.81314	-7.57036	7.07622e-05	0.00260045	1.92051	PRDM4
1460	16806968	0.876506	8.28836	7.56831	7.08968e-05	0.00260072	1.91847	GOLGA8A,GOLGA8B
1461	16993335	-0.763199	6.45149	-7.5681	7.09111e-05	0.00260072	1.91825	ZNF354C
1462	17005396	-0.686336	7.87511	-7.56802	7.09164e-05	0.00260072	1.91817	GMNN
1463	17005108	-0.819127	7.25014	-7.5673	7.09635e-05	0.00260072	1.91746	ATXN1-AS1
1464	17126192	0.780863	8.77063	7.5651	7.11083e-05	0.00260424	1.91527	SNHG29,SNORD49B
1465	17012767	-1.07944	7.1488	-7.56348	7.12148e-05	0.00260637	1.91367	TBPL1
1466	16772144	-0.6679	8.59688	-7.56227	7.12953e-05	0.00260753	1.91245	SCARB1
1467	17082947	-0.848809	8.11288	-7.55997	7.14475e-05	0.00261131	1.91017	ZNF252P
1468	16911394	-0.749555	7.34349	-7.55286	7.19199e-05	0.00262679	1.90309	ANKEF1
1469	16901393	0.720493	6.81836	7.55031	7.20907e-05	0.00263089	1.90054	FHL2
1470	16963798	-0.722707	8.80095	-7.54959	7.21388e-05	0.00263089	1.89983	PCGF3
1471	17118478	-1.0123	6.44485	-7.54806	7.22412e-05	0.00263089	1.89831	TEKT4P2,
1472	17082088	-0.672215	8.23963	-7.54697	7.23144e-05	0.00263089	1.89722	ZC3H3
1473	16668730	-0.612074	7.68721	-7.54647	7.23481e-05	0.00263089	1.89672	DDX20
1474	16654683	1.73873	7.68867	7.54646	7.23489e-05	0.00263089	1.89671	NA
1475	16753270	0.691915	8.06126	7.54606	7.23757e-05	0.00263089	1.89631	NA
1476	16763481	0.605451	8.81702	7.54477	7.24626e-05	0.00263227	1.89502	SCAF11
1477	17016263	-0.89687	5.20294	-7.5418	7.26623e-05	0.00263606	1.89207	CMAHP
1478	16856483	-0.735547	9.15589	-7.54115	7.27067e-05	0.00263606	1.89141	MIDN
1479	17047652	-0.700452	8.93652	-7.54103	7.27145e-05	0.00263606	1.8913	PTPN12
1480	17085236	0.741002	8.77758	7.5337	7.32118e-05	0.00265229	1.88398	CBWD5
1481	17088124	-0.724013	9.16422	-7.53214	7.33182e-05	0.00265332	1.88242	HSDL2
1482	16691486	-0.767969	8.11005	-7.53183	7.33391e-05	0.00265332	1.88212	GDAP2
1483	16758130	-0.716637	8.19993	-7.52925	7.35152e-05	0.0026579	1.87954	ORAI1
1484	17004657	-0.8232	6.14945	-7.52853	7.35648e-05	0.0026579	1.87882	BMP6
1485	16766035	0.614952	9.41922	7.52347	7.39117e-05	0.00266692	1.87377	CNPY2
1486	16840799	-0.723317	5.68801	-7.52344	7.3914e-05	0.00266692	1.87373	ALOX12B
1487	16685779	0.630683	10.429	7.52169	7.40346e-05	0.00266948	1.87198	PPT1
1488	16690067	-0.705532	8.26662	-7.51872	7.42396e-05	0.00267507	1.86901	SASS6
1489	16840945	1.00241	6.10988	7.51779	7.43041e-05	0.0026756	1.86808	SLC25A35
1490	16886602	0.702462	7.25074	7.51546	7.44653e-05	0.0026796	1.86575	ARL6IP6
1491	16965922	-0.625573	9.17125	-7.5139	7.45735e-05	0.00268169	1.8642	PGM2
1492	17119930	1.19379	5.01395	7.51293	7.46411e-05	0.00268233	1.86322	LINC01661
1493	16908926	1.76695	7.03719	7.51185	7.47163e-05	0.00268323	1.86214	NA
1494	16913737	-0.59985	11.2395	-7.5056	7.51531e-05	0.00269238	1.85588	TOP1
1495	16758549	-0.718242	9.24272	-7.50548	7.51611e-05	0.00269238	1.85577	,ARL6IP4
1496	16867756	-1.38395	5.35002	-7.50496	7.51978e-05	0.00269238	1.85524	TUBB4A
1497	16837646	0.666543	8.48213	7.50473	7.52139e-05	0.00269238	1.85501	TMEM104
1498	16803932	0.699785	7.95395	7.50461	7.52222e-05	0.00269238	1.8549	GOLGA6L10,,GOLGA6L9,GOLGA6L4,GOLGA6L5P,GOLGA6L3
1499	16755908	-0.632393	8.64601	-7.50174	7.54242e-05	0.00269781	1.85202	DRAM1
1500	17089027	-0.848337	7.96786	-7.50074	7.54939e-05	0.00269851	1.85102	ARPC5L
1501	17057884	0.895367	7.08425	7.49884	7.56283e-05	0.00270151	1.84911	SEC61G
1502	16965527	-0.623592	8.42367	-7.49794	7.56916e-05	0.00270197	1.84822	PI4K2B
1503	17100777	-0.64277	7.8227	-7.48933	7.63028e-05	0.0027211	1.83958	NA
1504	16858710	-0.862824	9.20286	-7.48896	7.63289e-05	0.0027211	1.83921	JUNB
1505	16735738	-0.73591	7.43065	-7.48818	7.63851e-05	0.00272129	1.83842	RNF141
1506	16866867	-0.837157	9.85137	-7.48199	7.68277e-05	0.00273524	1.83222	MOB3A
1507	17044969	0.629272	10.3024	7.47668	7.72101e-05	0.00274703	1.82689	AVL9
1508	16821239	-0.621832	9.59932	-7.47421	7.73888e-05	0.00275156	1.82441	CENPN
1509	16702285	-1.34566	5.6307	-7.47204	7.75462e-05	0.00275533	1.82223	ITIH2
1510	16786625	0.786603	6.9432	7.47128	7.76018e-05	0.00275548	1.82146	FLVCR2
1511	16765404	0.61181	7.63857	7.46718	7.78998e-05	0.00276423	1.81734	CALCOCO1
1512	16851026	-0.714836	8.84659	-7.46197	7.82812e-05	0.00277438	1.81209	IMPA2
1513	17098004	-0.60435	10.5857	-7.46186	7.82893e-05	0.00277438	1.81198	RAB14
1514	16705620	-0.608341	9.66549	-7.45996	7.84286e-05	0.0027771	1.81007	TSPAN15
1515	17025895	0.729548	6.75239	7.4594	7.84697e-05	0.0027771	1.80951	WDR27
1516	17000235	-1.01022	6.50431	-7.4552	7.87793e-05	0.00278349	1.80528	SPOCK1
1517	17057413	0.880321	7.25401	7.45488	7.88032e-05	0.00278349	1.80496	SNHG15
1518	17094613	0.656116	8.85999	7.45484	7.8806e-05	0.00278349	1.80492	NA
1519	17094855	0.816303	8.32196	7.45143	7.90587e-05	0.00279058	1.80148	ABHD17B
1520	17125156	-0.804739	6.0344	-7.44764	7.93403e-05	0.00279868	1.79766	LINC01503
1521	16857608	-0.840904	8.07099	-7.44413	7.96016e-05	0.00280605	1.79413	,ZNF358
1522	16824046	-0.680625	8.43089	-7.44332	7.96626e-05	0.00280617	1.79331	CPPED1
1523	16670681	0.666717	10.9237	7.44268	7.97098e-05	0.00280617	1.79267	ANXA9
1524	16770463	-1.67747	8.084	-7.43515	8.02756e-05	0.00282424	1.78508	NA
1525	16918832	-0.641244	8.19334	-7.43366	8.03883e-05	0.00282635	1.78357	NFS1
1526	16733421	0.999763	6.6132	7.43123	8.0572e-05	0.00283095	1.78112	TMEM45B
1527	16650451	0.928272	7.86662	7.42786	8.08278e-05	0.00283808	1.77771	NA
1528	16886677	0.744833	9.77218	7.42584	8.09812e-05	0.0028416	1.77568	GPD2
1529	16833000	-0.604237	7.68718	-7.42216	8.12621e-05	0.00284808	1.77196	RAB11FIP4
1530	16994890	-0.683813	9.48538	-7.42203	8.1272e-05	0.00284808	1.77183	DROSHA
1531	16777380	2.73652	5.19779	7.42077	8.13682e-05	0.00284899	1.77056	RNY3P4
1532	16755536	1.45986	7.20931	7.4203	8.14042e-05	0.00284899	1.77008	NA
1533	16764093	0.944043	8.86652	7.41948	8.14675e-05	0.00284934	1.76925	NA
1534	17092738	1.06326	6.24479	7.4165	8.1696e-05	0.00285547	1.76624	NA
1535	17079918	-0.585395	9.65346	-7.4154	8.17812e-05	0.00285659	1.76512	AZIN1
1536	16763764	0.811668	6.7701	7.41403	8.18864e-05	0.0028584	1.76374	VDR
1537	16891575	0.663042	10.6219	7.4131	8.1958e-05	0.00285904	1.7628	ACSL3
1538	16867349	-0.679942	7.1925	-7.409	8.22752e-05	0.00286785	1.75865	SEMA6B
1539	17062533	-1.51644	5.4312	-7.40845	8.23176e-05	0.00286785	1.7581	LINC02830
1540	17031139	-0.736607	5.21637	-7.40562	8.2538e-05	0.00287366	1.75523	HLA-DRA,
1541	16840723	0.943843	6.9355	7.40174	8.28405e-05	0.00288175	1.7513	SAT2
1542	17106604	0.779986	7.75019	7.40126	8.28778e-05	0.00288175	1.75081	NDUFA1
1543	17047795	0.796346	4.51108	7.39579	8.33062e-05	0.00289379	1.74527	NA
1544	16823413	-0.585683	10.7763	-7.39546	8.33319e-05	0.00289379	1.74494	TRAP1
1545	16662735	0.916523	2.97981	7.39462	8.33982e-05	0.00289421	1.74409	RNU6-605P
1546	16934970	-0.696636	7.78524	-7.39381	8.34624e-05	0.00289457	1.74326	TMEM184B
1547	17108181	0.647593	8.40056	7.39221	8.35884e-05	0.00289706	1.74164	SSR4
1548	16948401	-0.671284	9.00276	-7.38953	8.37999e-05	0.00290252	1.73893	FXR1
1549	16999631	0.592321	9.05786	7.38744	8.39655e-05	0.00290625	1.73681	FNIP1
1550	17002962	1.12369	5.56613	7.38636	8.40508e-05	0.00290625	1.73572	DRD1
1551	16823097	-0.657425	11.7574	-7.38526	8.41383e-05	0.00290625	1.7346	RNPS1
1552	16795794	0.584953	7.867	7.38494	8.41636e-05	0.00290625	1.73427	RPS6KA5
1553	17119482	1.15665	7.91955	7.38475	8.41787e-05	0.00290625	1.73408	SNHG5,SNORD50B
1554	16808460	0.65197	8.24819	7.38403	8.42364e-05	0.00290637	1.73335	SPG11
1555	17075112	-0.727805	6.18614	-7.38319	8.4303e-05	0.0029068	1.7325	NA
1556	16762597	0.688274	9.3806	7.3747	8.49824e-05	0.00292666	1.72387	TM7SF3
1557	16799409	0.823126	6.332	7.37463	8.49881e-05	0.00292666	1.7238	NA
1558	16752715	0.711677	6.55066	7.37343	8.50846e-05	0.0029278	1.72258	LRP1
1559	17058905	-0.678373	10.3513	-7.37286	8.51305e-05	0.0029278	1.722	YWHAG
1560	16948738	-0.589258	10.2798	-7.37102	8.52782e-05	0.00293066	1.72014	AP2M1
1561	16726707	-0.711791	9.34272	-7.37008	8.53545e-05	0.00293066	1.71918	MRPL49
1562	16866702	-1.05187	7.24503	-7.36979	8.53776e-05	0.00293066	1.71889	MEX3D
1563	16765744	0.644022	8.25772	7.36448	8.58076e-05	0.00294354	1.71349	CD63
1564	16862001	-0.843375	7.34096	-7.36372	8.58699e-05	0.00294379	1.71271	PLEKHG2
1565	17120818	-1.01368	5.51312	-7.36168	8.60354e-05	0.00294758	1.71065	,TBX20
1566	17121388	-0.775975	8.83472	-7.36045	8.61355e-05	0.00294912	1.7094	,RHPN2
1567	17086167	-0.714952	8.48785	-7.35624	8.64802e-05	0.00295863	1.70511	CEP78
1568	17059355	1.33551	4.77936	7.35571	8.65234e-05	0.00295863	1.70457	SEMA3D
1569	16666392	0.692313	7.70579	7.35446	8.66257e-05	0.00295944	1.7033	MIGA1
1570	16962272	-1.03817	6.90732	-7.35407	8.66575e-05	0.00295944	1.7029	C3orf70
1571	16852812	-0.840282	4.13378	-7.35334	8.67176e-05	0.0029596	1.70216	SERPINB5
1572	16772994	-0.569003	6.99278	-7.35179	8.68454e-05	0.00296208	1.70058	IFT88
1573	16806936	0.877657	8.30938	7.34835	8.71286e-05	0.00296985	1.69708	GOLGA8A,GOLGA8B
1574	17119424	0.692513	4.70608	7.34496	8.74099e-05	0.00297651	1.69362	COX7C,SNORD138
1575	16922093	-0.661052	6.63497	-7.34465	8.74349e-05	0.00297651	1.69331
1576	16932117	-1.30752	4.69496	-7.34071	8.77624e-05	0.00298576	1.68929	GGT3P
1577	16775968	-0.727006	7.50843	-7.33959	8.78557e-05	0.00298704	1.68815	FARP1
1578	17117874	1.74521	5.2414	7.3377	8.8014e-05	0.00299052	1.68622
1579	16752008	1.51306	9.00822	7.33611	8.81463e-05	0.00299162	1.6846	NA
1580	16972616	-0.666157	8.03613	-7.33598	8.8158e-05	0.00299162	1.68446	NEIL3
1581	16859454	-0.683593	8.97159	-7.33089	8.85844e-05	0.00300419	1.67928	BABAM1,
1582	16776658	0.57747	8.28016	7.32933	8.87163e-05	0.00300529	1.67768	ATP11A
1583	17087716	-0.636997	9.69805	-7.32918	8.87287e-05	0.00300529	1.67753	SMC2
1584	16676150	0.679383	8.48695	7.32837	8.87969e-05	0.0030057	1.6767	BTG2
1585	16744174	-0.738227	8.33456	-7.32702	8.89111e-05	0.00300766	1.67532	RDX
1586	16966173	-0.641925	10.8722	-7.32416	8.91532e-05	0.00301395	1.6724	UBE2K
1587	16910154	-0.852402	6.36436	-7.3215	8.93785e-05	0.00301967	1.66969
1588	17048576	-0.867267	6.46934	-7.32052	8.94618e-05	0.00302058	1.66869	PPP1R9A
1589	16757902	-0.638009	7.50985	-7.31874	8.96138e-05	0.00302197	1.66686	DYNLL1
1590	16778166	0.604426	6.11937	7.31872	8.96157e-05	0.00302197	1.66684	ALG5
1591	17118704	1.99349	5.31638	7.31706	8.97571e-05	0.00302483	1.66515	MIR3671,MIR101-1
1592	17053917	-0.629891	6.49776	-7.31607	8.98414e-05	0.00302577	1.66414	EN2
1593	16833983	-0.629019	9.11363	-7.31403	9.00157e-05	0.00302672	1.66205	MSL1
1594	16969414	-0.703477	9.99926	-7.31385	9.00318e-05	0.00302672	1.66186	TET2
1595	17085561	0.672024	9.15809	7.31319	9.00882e-05	0.00302672	1.66119	CBWD6,CBWD5,CBWD3
1596	17024770	-0.707758	11.3629	-7.3131	9.00954e-05	0.00302672	1.6611	RNU6-813P
1597	17122204	0.892518	8.59752	7.31035	9.03316e-05	0.00303276	1.65829	ANKRD36BP2,ANKRD36C,ANKRD36,ANKRD36B
1598	17124594	-0.763783	9.72806	-7.30374	9.09024e-05	0.00304692	1.65152	DTX2,DTX2P1-UPK3BP1-PMS2P11,DTX2P1
1599	16957568	-0.590233	11.6182	-7.3037	9.09059e-05	0.00304692	1.65148	NAA50
1600	16823928	-0.714422	9.68646	-7.30349	9.09239e-05	0.00304692	1.65127	LITAF
1601	16804804	0.606058	11.5646	7.30235	9.1023e-05	0.00304833	1.6501	IQGAP1
1602	16900475	0.807691	9.68382	7.30014	9.12148e-05	0.00305285	1.64784	NA
1603	16841561	-0.716848	8.13725	-7.29946	9.12734e-05	0.0030529	1.64715	PMP22
1604	17118654	1.03972	6.26724	7.29502	9.16608e-05	0.00306376	1.64259	RPS8,SNORD38A,SNORD38B
1605	16963873	1.0891	5.66401	7.29443	9.17121e-05	0.00306376	1.64199	NA
1606	16688665	0.65218	8.94594	7.29307	9.1831e-05	0.00306582	1.6406	PIGK
1607	16778392	-1.01506	7.74123	-7.28993	9.2107e-05	0.00307312	1.63738	FOXO1
1608	16822330	-0.643053	9.10143	-7.28532	9.25129e-05	0.00308474	1.63265	NPRL3
1609	16778715	0.593811	9.56908	7.27863	9.31055e-05	0.00310257	1.62579	TPT1
1610	16977094	0.707536	9.57202	7.27567	9.33693e-05	0.00310943	1.62275	SCARB2
1611	17078793	-0.822084	5.52999	-7.27275	9.36305e-05	0.00311518	1.61975
1612	16757493	-0.702722	7.41706	-7.27189	9.37072e-05	0.00311518	1.61887	SDSL
1613	16948209	-0.638035	8.6409	-7.27179	9.37164e-05	0.00311518	1.61876	PIK3CA
1614	16805432	-0.843191	7.15185	-7.26494	9.43322e-05	0.00313298	1.61172
1615	16772023	-0.563614	9.55818	-7.26453	9.43686e-05	0.00313298	1.61131	EIF2B1
1616	17056968	0.765026	8.087	7.26135	9.46567e-05	0.0031388	1.60803	MPLKIP
1617	16895344	0.671523	7.05414	7.2613	9.46611e-05	0.0031388	1.60798	DNMT3A
1618	17121432	0.721314	8.33801	7.25487	9.52457e-05	0.00315622	1.60136	ERVK13-1
1619	16656941	1.04809	7.07054	7.25386	9.53379e-05	0.00315622	1.60032	NA
1620	16662475	0.665337	8.40117	7.25358	9.53631e-05	0.00315622	1.60004	AGO3
1621	16815815	-0.608434	8.82738	-7.25127	9.55741e-05	0.00316122	1.59766	NUBP1
1622	17092177	-1.38146	4.00388	-7.25064	9.56318e-05	0.00316122	1.59701	RLN2
1623	16706259	-0.763385	9.93611	-7.24285	9.6349e-05	0.00318296	1.58898	KAT6B
1624	16775763	0.624033	10.4103	7.24042	9.65732e-05	0.0031884	1.58649	KRT18P27,MIR622
1625	16971463	1.09407	6.022	7.23163	9.73911e-05	0.00321343	1.57742	RN7SKP35
1626	16764564	0.661625	6.85568	7.23049	9.7498e-05	0.00321498	1.57624	LIMA1
1627	16713318	-0.638158	9.71482	-7.22978	9.75643e-05	0.00321518	1.57551	NAMPTP1,NAMPT
1628	16914117	0.795983	7.6899	7.22401	9.8107e-05	0.00323108	1.56955	PABPC1L
1629	16747150	1.21103	5.41754	7.22274	9.82261e-05	0.00323179	1.56825
1630	16851344	-0.759089	9.44939	-7.2225	9.82491e-05	0.00323179	1.56799	SNRPD1
1631	16888106	-0.791718	7.60428	-7.21536	9.89256e-05	0.00325205	1.56062	OSBPL6
1632	16942991	-0.582102	8.74467	-7.21405	9.90504e-05	0.00325416	1.55926	ARL13B
1633	17021083	0.634716	7.38107	7.21264	9.91849e-05	0.00325483	1.5578	ELOVL4
1634	16756212	0.82009	5.79963	7.21256	9.91922e-05	0.00325483	1.55772	CHST11
1635	16872551	0.764254	9.85775	7.21022	9.94154e-05	0.00325957	1.55531	TGFB1
1636	17121774	0.587451	5.84366	7.20925	9.95085e-05	0.00325957	1.5543	LINC00910
1637	17120998	0.580125	7.20404	7.20886	9.95457e-05	0.00325957	1.5539	,MRPS31P5
1638	16770733	0.681948	10.0026	7.20846	9.95846e-05	0.00325957	1.55348	MED13L
1639	17005089	0.609471	6.40988	7.20787	9.96408e-05	0.00325957	1.55287	NA
1640	16994045	-0.777587	7.57846	-7.20576	9.98434e-05	0.0032597	1.55069	MRPL36
1641	16752007	1.4173	9.93438	7.20514	9.99026e-05	0.0032597	1.55005	NA
1642	17122646	1.59159	5.46582	7.20475	9.99408e-05	0.0032597	1.54964	CYTOR,MIR4435-2HG
1643	16878583	0.995848	7.24137	7.2042	9.99935e-05	0.0032597	1.54908	SNORD92
1644	17120240	1.04328	5.43342	7.20411	0.000100002	0.0032597	1.54898	LINC01409
1645	16776827	-0.649737	8.83333	-7.20403	0.00010001	0.0032597	1.5489	CUL4A
1646	16654663	1.17735	9.76476	7.20078	0.000100324	0.00326795	1.54553	NA
1647	16705577	-0.667509	8.90293	-7.19946	0.000100451	0.00326848	1.54417	HK1
1648	16852312	-0.782903	7.84139	-7.19935	0.000100462	0.00326848	1.54405	SKA1
1649	17075426	0.727866	7.2318	7.19633	0.000100754	0.00327601	1.54093	TNFRSF10B
1650	16885432	0.666567	10.6009	7.19237	0.00010114	0.00328303	1.53682	UGGT1
1651	17002052	-0.986946	6.87654	-7.19162	0.000101213	0.00328303	1.53605	FAXDC2
1652	17121148	0.600774	9.19581	7.19155	0.00010122	0.00328303	1.53597	HERC2P3,HERC2P2,HERC2,HERC2P9,HERC2P4,HERC2P5,HERC2P8
1653	16792859	-0.656606	7.62797	-7.19067	0.000101306	0.00328303	1.53506	PYGL
1654	17005888	0.949314	6.54696	7.19057	0.000101315	0.00328303	1.53496	ZNF165
1655	16690493	-0.745768	8.1531	-7.19034	0.000101338	0.00328303	1.53472	WDR47
1656	16735806	-0.915833	11.6345	-7.18845	0.000101522	0.00328669	1.53277	NA
1657	16916352	-0.673609	7.98537	-7.18793	0.000101573	0.00328669	1.53223	SRXN1,
1658	16784215	0.663525	7.14371	7.18555	0.000101807	0.00329189	1.52976	GPR137C
1659	16856761	-0.6133	12.2909	-7.18453	0.000101907	0.00329189	1.5287	NA
1660	17105018	0.825993	7.47689	7.18439	0.00010192	0.00329189	1.52856	ATP7A
1661	17054040	-0.603698	9.99445	-7.18318	0.000102039	0.00329189	1.5273	UBE3C
1662	16715361	0.63367	9.44508	7.18317	0.000102041	0.00329189	1.52729	P4HA1
1663	16741969	-0.642563	8.57519	-7.18226	0.00010213	0.0032928	1.52635	UCP2
1664	16919418	-0.633636	8.94544	-7.18113	0.000102242	0.00329443	1.52517	FITM2
1665	16948320	-0.612901	8.77075	-7.17873	0.000102479	0.00329933	1.52268	USP13
1666	16798895	0.753951	6.55891	7.1783	0.000102521	0.00329933	1.52224	GOLGA8R,GOLGA8Q,GOLGA8O,GOLGA8N
1667	16833502	0.756068	6.67567	7.17772	0.000102579	0.00329933	1.52163	LHX1
1668	16666013	0.615059	8.47449	7.17258	0.000103089	0.00331374	1.5163	SRSF11
1669	16875599	-0.613598	6.67374	-7.16733	0.000103613	0.00332418	1.51085	TNNT1
1670	16977606	-0.936988	4.48212	-7.1667	0.000103677	0.00332418	1.51019
1671	16846849	0.65184	8.00023	7.16623	0.000103723	0.00332418	1.50971	COX11
1672	17050778	-0.593717	8.00164	-7.16603	0.000103744	0.00332418	1.50949	ING3
1673	16793750	0.711356	8.96139	7.16583	0.000103764	0.00332418	1.50928	SGPP1
1674	16945357	-0.745538	9.39283	-7.16561	0.000103786	0.00332418	1.50906	HMCES
1675	16991345	-0.673936	7.69651	-7.16493	0.000103854	0.00332437	1.50835	GALNT10
1676	16697599	0.674098	7.40704	7.15539	0.000104817	0.00335319	1.49843	DENND1B
1677	16848953	-0.615448	6.83691	-7.15105	0.000105258	0.00336363	1.49391	TRIM47
1678	16674604	0.882254	7.41055	7.1505	0.000105314	0.00336363	1.49334	MR1
1679	16677898	0.870271	4.90643	7.15034	0.000105331	0.00336363	1.49317
1680	17123496	-0.600092	10.9338	-7.14817	0.000105553	0.00336593	1.49091	RNPS1,RNPS1P1
1681	17108779	0.712886	8.28246	7.14809	0.000105561	0.00336593	1.49083	ARSD
1682	16678335	-0.691627	9.57117	-7.14779	0.000105591	0.00336593	1.49051	NA
1683	17123494	-0.603142	10.9673	-7.14697	0.000105675	0.0033666	1.48966	RNPS1,RNPS1P1
1684	16771432	-0.644461	8.83234	-7.14486	0.000105891	0.00337027	1.48746	NA
1685	16681775	0.65903	5.86272	7.14334	0.000106047	0.00337027	1.48589	MTHFR
1686	17029712	-0.807089	7.15922	-7.14326	0.000106056	0.00337027	1.4858	HLA-DRB1
1687	17039914	-0.807089	7.15922	-7.14326	0.000106056	0.00337027	1.4858	HLA-DRB1
1688	16651491	0.676365	9.77551	7.14278	0.000106105	0.00337027	1.4853	NA
1689	16964735	-0.820901	5.90344	-7.14098	0.00010629	0.00337414	1.48343	S100P
1690	16778005	0.908721	6.20038	7.14006	0.000106385	0.00337516	1.48247	NA
1691	16734271	-0.694195	6.91591	-7.13809	0.000106588	0.00337924	1.48041	DUSP8
1692	17014324	-0.684862	8.24504	-7.1376	0.000106639	0.00337924	1.4799	MRPL18
1693	16856762	-0.594492	12.4129	-7.1351	0.000106898	0.00338544	1.47729	NA
1694	16918633	0.682922	7.59699	7.13348	0.000107065	0.00338873	1.47561	EDEM2
1695	17105727	-0.837062	3.3324	-7.13184	0.000107237	0.00339216	1.47389
1696	17121470	0.583587	9.1668	7.13112	0.000107311	0.00339232	1.47314	HERC2P3,HERC2P2,HERC2,HERC2P9,HERC2P4,HERC2P5,HERC2P8
1697	16704875	-0.551508	10.6444	-7.13057	0.000107368	0.00339232	1.47257	NCOA4
1698	17124698	0.712991	5.4989	7.12666	0.000107776	0.0034032	1.4685	SEPTIN7P2
1699	16865308	0.693961	8.17747	7.12519	0.000107931	0.00340494	1.46695	LENG8
1700	16924966	-0.615778	8.38326	-7.12492	0.000107958	0.00340494	1.46668	MIS18A
1701	16931766	1.02132	5.76297	7.12333	0.000108125	0.00340821	1.46502	KLHDC7B
1702	17052823	-0.836918	8.4784	-7.12201	0.000108264	0.00341058	1.46363	ZYX
1703	16987395	0.683425	11.0011	7.12088	0.000108383	0.00341065	1.46245	RHOBTB3
1704	16878947	-0.690878	9.0944	-7.12078	0.000108394	0.00341065	1.46235	LTBP1
1705	16990312	-0.734014	8.09409	-7.11243	0.000109277	0.00343597	1.45363	PCDHB13
1706	16960775	0.654333	7.9479	7.11152	0.000109373	0.00343597	1.45268	SSR3
1707	16840308	0.72266	9.36156	7.11136	0.000109391	0.00343597	1.45251	DERL2
1708	16691403	-0.7872	7.25266	-7.10888	0.000109655	0.00344005	1.44991	CD58
1709	16830573	0.699967	13.1263	7.10844	0.000109701	0.00344005	1.44946	EIF4A1,SNORA48
1710	17063168	-0.554717	9.92521	-7.10833	0.000109713	0.00344005	1.44934	CNOT4
1711	17088296	-0.95028	4.57411	-7.10741	0.000109811	0.0034405	1.44838
1712	17111555	-0.724972	5.93152	-7.10665	0.000109893	0.0034405	1.44758	USP51
1713	16990321	-0.636642	8.49501	-7.10639	0.00010992	0.0034405	1.44731	PCDHB14
1714	16926751	0.881001	7.21609	7.1046	0.000110112	0.00344313	1.44544	NA
1715	16854486	-0.815112	7.62268	-7.10411	0.000110165	0.00344313	1.44492	DSC2
1716	16829170	0.658111	10.0115	7.10381	0.000110197	0.00344313	1.44461	PIEZO1
1717	16721126	-0.563623	9.4345	-7.10171	0.000110422	0.00344818	1.44241	RRM1
1718	16664599	-0.639008	9.12319	-7.10107	0.000110491	0.00344831	1.44174	RNF11
1719	16725393	-0.645858	10.6042	-7.09766	0.000110858	0.00345383	1.43818	TMEM109
1720	16947729	0.623663	4.19636	7.09741	0.000110885	0.00345383	1.43792	LRRC77P
1721	16729298	0.711899	7.30841	7.09719	0.000110909	0.00345383	1.43768	ACER3
1722	16682829	-0.674843	8.16201	-7.09704	0.000110926	0.00345383	1.43752	CAMK2N1
1723	16757766	0.707422	5.78698	7.09622	0.000111013	0.00345456	1.43667	NA
1724	17122234	-0.693635	10.4656	-7.09429	0.000111223	0.00345908	1.43464	IGSF3,
1725	16663810	0.883083	8.49788	7.09337	0.000111323	0.00345982	1.43368	NA
1726	17121598	0.796397	4.65199	7.09288	0.000111376	0.00345982	1.43316	CCDC144A,,FAM106A,CCDC144B,CCDC144CP
1727	16904039	0.720986	8.47815	7.08922	0.000111774	0.00347016	1.42933	BAZ2B
1728	16784412	0.604203	9.22274	7.08835	0.000111868	0.00347108	1.42842	KTN1
1729	16816627	-0.662892	7.61712	-7.08528	0.000112204	0.00347843	1.4252	REXO5
1730	16838887	-0.633556	9.7134	-7.08463	0.000112274	0.00347843	1.42452	,SLC25A10
1731	16782687	0.667303	6.80301	7.08432	0.000112309	0.00347843	1.42419	,IRF9
1732	16940615	0.656382	8.10828	7.08276	0.00011248	0.00347843	1.42256	WDR6
1733	17104313	0.73427	7.65293	7.08267	0.00011249	0.00347843	1.42246	AR
1734	17004903	-0.909538	7.57137	-7.08263	0.000112494	0.00347843	1.42242	EDN1
1735	16863115	0.754885	5.3406	7.07779	0.000113026	0.00348983	1.41735	APOE
1736	16959505	1.25048	5.69191	7.07766	0.00011304	0.00348983	1.41721	RNA5SP141
1737	16899619	0.62385	9.36071	7.0775	0.000113058	0.00348983	1.41705	TGOLN2
1738	17062230	-0.884702	6.19628	-7.07621	0.000113201	0.00349055	1.41569	TSPAN12
1739	17095661	1.15411	3.695	7.07601	0.000113223	0.00349055	1.41548	NA
1740	17125688	0.702932	5.69638	7.07552	0.000113277	0.00349055	1.41497	LINC00894
1741	16948675	-0.581369	7.71358	-7.0744	0.000113401	0.00349236	1.41379	EIF2B5
1742	16865679	0.738718	7.67176	7.0723	0.000113634	0.00349753	1.41158	NA
1743	16993430	0.771675	10.5862	7.07154	0.000113717	0.0034981	1.41079	NA
1744	17010175	-0.612186	8.69506	-7.06966	0.000113927	0.00350255	1.40881	OGFRL1
1745	16823198	-0.771433	10.8164	-7.06889	0.000114013	0.00350313	1.408	NA
1746	17119062	0.800642	7.8497	7.06831	0.000114077	0.00350313	1.4074	SNHG29,SNORD49B,SNORD49A
1747	16811832	-0.897747	7.12391	-7.06684	0.000114241	0.00350616	1.40585	SNUPN
1748	16656999	1.38887	6.09483	7.06455	0.000114497	0.00351199	1.40345	NA
1749	16938583	0.616	11.6683	7.06287	0.000114685	0.00351505	1.40167	STT3B
1750	16927615	-0.572634	7.96786	-7.06249	0.000114727	0.00351505	1.40128	UBE2L3
1751	16816424	1.18046	6.49501	7.05979	0.000115031	0.00352234	1.39844	SYT17
1752	16679557	0.6422	8.36284	7.0591	0.000115108	0.00352269	1.39772	COX20
1753	17077659	0.600809	7.52824	7.05553	0.000115511	0.003533	1.39396	GGH
1754	16698947	-0.891317	11.3919	-7.05421	0.000115661	0.00353556	1.39257	RNU5A-8P
1755	16745922	0.607742	11.3198	7.05282	0.000115817	0.00353834	1.39111	SRPRA
1756	17058617	-0.639857	8.60209	-7.0511	0.000116013	0.00354228	1.3893	RFC2
1757	16823102	-0.659583	12.0207	-7.05041	0.000116091	0.00354267	1.38857	NA
1758	17097813	-0.565876	8.45638	-7.04697	0.000116482	0.00355257	1.38495	CDK5RAP2
1759	17016503	-0.7112	12.8746	-7.04267	0.000116974	0.00356263	1.38042	H3C11
1760	17085627	0.996658	4.56073	7.04264	0.000116978	0.00356263	1.38039
1761	16902064	0.58785	10.1227	7.04235	0.000117011	0.00356263	1.38008	SLC35F5
1762	17123262	1.23913	6.0203	7.04172	0.000117083	0.00356279	1.37942	TRANK1
1763	16984056	1.08275	5.26734	7.04112	0.000117152	0.00356288	1.37878	SLC1A3
1764	16897112	0.578599	9.03947	7.03829	0.000117477	0.00357072	1.37581	PREPL
1765	17121260	0.570083	5.21138	7.03642	0.000117693	0.00357525	1.37384	WHAMMP3,WHAMMP2
1766	16844872	-0.609358	11.2489	-7.03416	0.000117954	0.00358115	1.37145	JUP
1767	16812245	1.36507	5.6377	7.03315	0.000118071	0.00358269	1.37038	CTSH
1768	16817945	-0.659744	8.32614	-7.03157	0.000118254	0.00358621	1.36872	FBRS
1769	16653767	0.994017	7.38441	7.0305	0.000118378	0.00358711	1.36759	NA
1770	17044795	0.837862	8.10183	7.03016	0.000118417	0.00358711	1.36723
1771	16877555	0.651174	10.2362	7.02636	0.000118859	0.00359747	1.36323	RHOB
1772	16735819	-0.823267	11.7647	-7.0258	0.000118925	0.00359747	1.36263	NA
1773	16736554	-0.656143	7.76427	-7.02549	0.000118961	0.00359747	1.36231	SPTY2D1
1774	17118430	1.0231	5.2804	7.02235	0.000119328	0.00360578	1.35899	NA
1775	16858386	0.608133	11.6555	7.02174	0.0001194	0.00360578	1.35834	LDLR
1776	16818204	0.624939	7.98539	7.02142	0.000119437	0.00360578	1.35801	KAT8,
1777	16854088	-0.656691	7.01056	-7.02005	0.000119598	0.0036086	1.35656	FAM210A
1778	16739317	-0.584575	10.4338	-7.01731	0.00011992	0.00361629	1.35367	MTA2
1779	16716870	0.609513	9.00685	7.01587	0.00012009	0.00361888	1.35215	TCTN3
1780	16965346	-0.560702	9.81392	-7.01543	0.000120141	0.00361888	1.35169	NCAPG
1781	16928372	-0.772293	6.84334	-7.01483	0.000120213	0.003619	1.35105	KIAA1671
1782	16916546	-0.639565	8.99299	-7.01232	0.000120509	0.0036231	1.3484	SNRPB
1783	16846175	0.80681	6.67681	7.01219	0.000120525	0.0036231	1.34826	NFE2L1-DT
1784	17079771	-0.781373	5.97816	-7.01153	0.000120602	0.0036231	1.34756
1785	16930570	-0.595553	7.47468	-7.01111	0.000120653	0.0036231	1.34711	L3MBTL2
1786	17011832	-1.25772	7.49115	-7.01082	0.000120687	0.0036231	1.34681	MARCKS
1787	16858321	-0.579092	10.5974	-7.00786	0.000121039	0.00363165	1.34368	CARM1
1788	17006863	-0.59655	11.8092	-7.00379	0.000121524	0.00364416	1.33938	HSPA1A,HSPA1B
1789	17055082	0.560797	9.99071	7.00309	0.000121608	0.00364465	1.33863	ZNF12
1790	16801299	-1.35394	6.86016	-7.0004	0.000121931	0.00364829	1.33578	C15orf65
1791	16654665	1.01192	9.49232	6.99994	0.000121985	0.00364829	1.3353	NA
1792	16799231	-0.762088	6.71364	-6.99964	0.000122021	0.00364829	1.33499	SPRED1
1793	16653731	0.847863	7.33291	6.99937	0.000122054	0.00364829	1.3347	NA
1794	16903897	0.770105	8.03213	6.99878	0.000122125	0.00364829	1.33407	NR4A2
1795	17122622	0.762523	4.59656	6.99867	0.000122138	0.00364829	1.33395	CT75
1796	16681390	0.842328	6.93175	6.9958	0.000122483	0.00365657	1.33092	ENO1
1797	17077341	-1.53642	4.51872	-6.99004	0.00012318	0.0036732	1.32482	SDR16C5
1798	16974146	-0.662948	5.58989	-6.98967	0.000123225	0.0036732	1.32442	ABLIM2
1799	16801179	-0.618658	9.03049	-6.9895	0.000123246	0.0036732	1.32424	MAPK6
1800	16813922	0.598128	6.53628	6.98846	0.000123372	0.00367492	1.32314	NA
1801	17019689	0.61724	7.82812	6.98688	0.000123564	0.00367858	1.32147	ENPP5
1802	16728442	0.590113	7.74372	6.9852	0.000123769	0.00368264	1.31969	NADSYN1
1803	16841852	0.625243	8.19925	6.98116	0.000124262	0.00369427	1.3154	PLD6,
1804	16825196	-0.552355	8.98849	-6.98012	0.00012439	0.00369427	1.3143	NSMCE1
1805	16752018	1.16279	8.95501	6.97956	0.000124459	0.00369427	1.3137	NA
1806	16685099	0.573222	8.57368	6.97948	0.000124469	0.00369427	1.31362	KIAA0319L
1807	17062580	-0.588437	9.18997	-6.97919	0.000124504	0.00369427	1.31331	ZNF800
1808	16764325	-0.862932	7.41745	-6.97617	0.000124876	0.00370325	1.3101
1809	16811936	0.639527	7.9146	6.97333	0.000125226	0.00371105	1.3071	SCAPER
1810	17028313	-0.796576	5.21479	-6.97201	0.000125389	0.00371105	1.30569	HLA-DRA,
1811	17122206	0.774213	6.78666	6.97182	0.000125412	0.00371105	1.3055	ANKRD36BP2,ANKRD36,ANKRD36B
1812	16673557	-0.559747	8.07757	-6.9718	0.000125416	0.00371105	1.30546	C1orf112
1813	16880442	-0.613035	6.25451	-6.96473	0.000126294	0.00373462	1.29796	KIAA1841
1814	16996983	0.650178	8.22665	6.96427	0.000126352	0.00373462	1.29747	NAIPP2,NAIP
1815	16852997	-0.635162	7.57546	-6.96126	0.000126728	0.00374367	1.29427	SOCS6
1816	16997399	1.18297	9.71052	6.95995	0.000126891	0.00374618	1.29288	SNORA47
1817	16651235	1.31962	6.77308	6.95946	0.000126952	0.00374618	1.29236	NA
1818	17054923	0.640626	8.81819	6.95852	0.000127071	0.00374761	1.29136	PMS2
1819	16864901	-1.12885	5.10987	-6.95389	0.000127654	0.00376274	1.28644	ZNF137P
1820	16685036	0.727233	9.29431	6.95329	0.00012773	0.00376291	1.2858	,TMEM35B
1821	16802232	-0.656912	7.48264	-6.94965	0.000128191	0.00377442	1.28192	SMAD6
1822	17089119	-0.594465	7.43838	-6.94727	0.000128493	0.00378029	1.27939	PBX3
1823	16808334	0.64839	8.96657	6.94657	0.000128582	0.00378029	1.27864	PPIP5K1,
1824	16670072	0.648533	8.118	6.94641	0.000128602	0.00378029	1.27848	PDIA3P1
1825	16855973	-0.65278	9.36249	-6.9456	0.000128706	0.00378126	1.27761	CYB5A
1826	17034254	0.779781	9.05748	6.94284	0.000129058	0.00378953	1.27467	HLA-B
1827	16995938	-0.816138	7.5954	-6.94187	0.000129181	0.00379109	1.27364	C5orf34
1828	16837087	1.15798	6.12979	6.93717	0.000129785	0.00380671	1.26863	,SLC16A6P1
1829	16736807	-0.686594	6.57054	-6.93336	0.000130274	0.00381899	1.26457	CCDC34
1830	17012632	0.727946	9.48847	6.93097	0.000130583	0.0038245	1.26202	ENPP1
1831	16679887	0.640569	10.1507	6.93028	0.000130673	0.0038245	1.26129	NA
1832	16793559	0.598475	8.76239	6.93026	0.000130676	0.0038245	1.26126	DHRS7
1833	16981490	-0.767942	6.31648	-6.9262	0.000131203	0.003835	1.25693
1834	16892342	-0.670432	6.59924	-6.92619	0.000131204	0.003835	1.25692	EFHD1
1835	16821280	-0.860536	9.14113	-6.92584	0.00013125	0.003835	1.25655	GAN
1836	16655953	1.2188	6.63143	6.92515	0.00013134	0.00383555	1.25581	NA
1837	16773650	0.648587	9.03271	6.92428	0.000131453	0.00383676	1.25488	USPL1
1838	16821585	-0.610373	10.3374	-6.92297	0.000131624	0.00383965	1.25348	GSE1
1839	16889218	-0.692978	7.23511	-6.92006	0.000132005	0.00384867	1.25038	SPATS2L
1840	16933667	-0.672732	8.68812	-6.91878	0.000132173	0.00384906	1.24901	NIPSNAP1
1841	17125290	0.669432	8.47091	6.91865	0.00013219	0.00384906	1.24887	CBWD2,CBWD1,CBWD6,CBWD4P,CBWD5,CBWD3
1842	17048859	-0.579958	11.0142	-6.91831	0.000132233	0.00384906	1.24851	,ARPC1A
1843	17012182	-0.911007	6.73289	-6.91624	0.000132507	0.00385473	1.24629	PKIB
1844	16654567	0.702927	4.9935	6.91574	0.000132572	0.00385473	1.24576	NA
1845	16870925	-0.604948	7.81849	-6.91364	0.000132849	0.00386069	1.24351	ZNF724,
1846	16962380	-0.965368	5.09014	-6.9121	0.000133052	0.00386448	1.24188	ETV5
1847	17101292	-0.753165	7.3699	-6.9075	0.000133661	0.00388009	1.23696	STS
1848	16938630	0.717361	9.84141	6.90597	0.000133866	0.00388264	1.23531	GPD1L
1849	16946666	0.699998	6.39184	6.90575	0.000133894	0.00388264	1.23509	NA
1850	16967614	-0.663237	7.87485	-6.90483	0.000134017	0.0038841	1.2341	DCK
1851	17114701	1.11395	6.77132	6.90365	0.000134174	0.00388656	1.23284	CDR1
1852	16697217	1.16258	5.63979	6.90243	0.000134337	0.00388917	1.23153	RNU7-13P,RNU7-41P
1853	16828897	-0.721864	7.8302	-6.89957	0.000134719	0.00389813	1.22848	C16orf74
1854	16691591	-0.802798	7.94343	-6.89871	0.000134835	0.00389834	1.22755	WARS2
1855	16796444	0.715403	8.06053	6.89843	0.000134872	0.00389834	1.22725	SNHG10,SCARNA13
1856	17120312	0.712699	3.59015	6.89255	0.000135664	0.00391911	1.22096	NA
1857	16821256	-0.586933	11.2193	-6.8896	0.000136063	0.00392852	1.2178	ATMIN
1858	16705831	-0.638242	9.74284	-6.88762	0.000136331	0.00393416	1.21567	SLC29A3
1859	16866993	-0.613669	8.96838	-6.88614	0.000136532	0.00393784	1.21409	SGTA
1860	16677473	0.569033	10.5061	6.88296	0.000136966	0.00394709	1.21067	KCTD3
1861	16694716	-0.57842	9.84576	-6.88232	0.000137054	0.00394709	1.20999	ISG20L2
1862	16833934	-0.613227	8.84577	-6.88217	0.000137074	0.00394709	1.20983	PSMD3
1863	16814211	-0.642626	7.32685	-6.88108	0.000137223	0.00394926	1.20866	NME4
1864	16931763	0.643261	7.3422	6.87349	0.000138266	0.00397698	1.20051	KLHDC7B
1865	17092208	0.589908	10.1085	6.87299	0.000138334	0.00397698	1.19998	ERMP1
1866	16651221	0.964088	7.6557	6.8718	0.000138499	0.00397922	1.1987	NA
1867	16994960	-0.566133	10.379	-6.87135	0.000138561	0.00397922	1.19822	GOLPH3
1868	16731822	0.576758	11.5181	6.86776	0.000139058	0.00399136	1.19437	UBE4A
1869	16994161	-0.702172	9.42085	-6.86611	0.000139287	0.00399488	1.19259	MED10
1870	16985518	0.559956	10.1388	6.86505	0.000139435	0.00399488	1.19145	PIK3R1
1871	17075829	-0.556934	7.59434	-6.86504	0.000139436	0.00399488	1.19144	ZNF395,FBXO16
1872	17027082	-0.883031	7.69776	-6.86448	0.000139514	0.00399488	1.19084	HLA-DRB3
1873	16968621	-0.61038	8.59529	-6.8639	0.000139595	0.00399488	1.19022	NUDT9
1874	16894883	-1.24546	6.15419	-6.86367	0.000139627	0.00399488	1.18997	MATN3
1875	17053654	-0.559971	8.06301	-6.86265	0.000139769	0.00399679	1.18888	NUB1
1876	17123152	-0.647988	10.253	-6.86152	0.000139927	0.00399919	1.18766	TPM4,
1877	17102230	-0.576749	9.45439	-6.85762	0.000140473	0.00401265	1.18347	POLA1
1878	17122216	1.18434	6.65399	6.85286	0.000141144	0.00402911	1.17834	ANKRD36BP2,ANKRD36,ANKRD36B
1879	16743091	-0.586432	8.69548	-6.85246	0.0001412	0.00402911	1.17792	FZD4
1880	16758601	-0.651151	6.92407	-6.85174	0.000141301	0.00402972	1.17714	SNRNP35
1881	16777401	-0.849835	7.02933	-6.85124	0.000141371	0.00402972	1.17661	MIPEP
1882	16723546	0.556696	8.17938	6.84955	0.000141611	0.00403442	1.17478	CAT
1883	16691023	0.580766	6.36061	6.84818	0.000141805	0.00403665	1.17332	SLC16A1
1884	16676008	0.649713	7.47253	6.84742	0.000141913	0.00403665	1.17249	PPP1R12B
1885	16938322	-0.828103	7.74354	-6.8474	0.000141916	0.00403665	1.17247	UBE2E2
1886	16764096	1.02222	9.11925	6.84601	0.000142113	0.00404012	1.17098	NA
1887	16804995	0.667558	7.64949	6.84377	0.000142432	0.00404705	1.16856	MAN2A2
1888	16655633	1.27706	8.00701	6.83733	0.000143353	0.00407105	1.16163	NA
1889	16889636	0.6529	11.0596	6.83353	0.000143901	0.00408445	1.15752	BMPR2
1890	17103282	-0.568307	8.90304	-6.8304	0.000144351	0.00409508	1.15416	FTSJ1
1891	17089371	0.581846	9.21458	6.82986	0.000144431	0.00409516	1.15357	STXBP1
1892	16930947	-0.785099	5.96384	-6.82922	0.000144523	0.00409559	1.15288	BIK
1893	16810847	0.559478	8.93817	6.82726	0.000144807	0.00409777	1.15077	DENND4A
1894	16730104	0.844266	8.99448	6.82715	0.000144823	0.00409777	1.15065	SCARNA9,
1895	16854202	-0.850588	7.18723	-6.82711	0.000144829	0.00409777	1.15061	ABHD3
1896	16658644	0.592441	6.76435	6.82635	0.00014494	0.00409875	1.14978	H6PD
1897	17114334	-0.703974	7.31318	-6.82563	0.000145044	0.00409953	1.14901	MIR503HG,MIR503,MIR424
1898	17122258	0.770007	4.48416	6.82503	0.000145132	0.00409986	1.14835	C2orf92
1899	16912625	-0.596883	9.94929	-6.82438	0.000145226	0.00410036	1.14766	MAPRE1
1900	17091928	0.570414	8.38083	6.8203	0.000145821	0.004115	1.14325	FOXD4
1901	16872189	-0.755482	5.71351	-6.81953	0.000145934	0.00411601	1.14242	LRFN1
1902	16770475	-1.4457	6.39071	-6.81742	0.000146244	0.00412259	1.14014	RASAL1
1903	16751491	-0.732002	5.36796	-6.8139	0.000146761	0.00413298	1.13634	NA
1904	16712076	-1.02176	6.46107	-6.81358	0.000146808	0.00413298	1.136	FAM171A1
1905	16676547	-0.675026	6.36976	-6.81318	0.000146867	0.00413298	1.13557	CTSE
1906	16804022	0.741101	6.02265	6.81232	0.000146995	0.00413298	1.13463	SNHG21,
1907	16950330	1.26854	4.1915	6.81229	0.000146998	0.00413298	1.1346
1908	17095217	1.04467	6.85077	6.80907	0.000147475	0.00414267	1.13112	FRMD3
1909	17070273	0.582069	8.17705	6.80892	0.000147497	0.00414267	1.13095	ZBTB10
1910	16748396	0.96959	6.04928	6.80753	0.000147704	0.00414629	1.12945	LINC01252
1911	16809659	0.674698	8.13009	6.80596	0.000147936	0.00415066	1.12775	PRTG
1912	16769754	-2.18619	4.469	-6.80505	0.000148071	0.00415226	1.12678	NA
1913	16947613	-0.709982	7.21705	-6.80083	0.000148702	0.00416683	1.1222	PPM1L
1914	16817824	-0.864904	7.54657	-6.80053	0.000148746	0.00416683	1.12188	CORO1A
1915	16728785	0.709335	5.88467	6.79998	0.000148828	0.00416695	1.12129	NA
1916	17104217	-0.815357	8.97831	-6.79914	0.000148954	0.00416831	1.12038	ZXDB
1917	16994054	-0.843712	7.16927	-6.79857	0.00014904	0.00416853	1.11976	IRX4
1918	17040387	0.885123	7.33014	6.79684	0.0001493	0.00417282	1.11788	HLA-A
1919	16654333	0.912305	7.05415	6.79586	0.000149446	0.00417282	1.11683	NA
1920	16686990	0.650056	8.00191	6.79577	0.00014946	0.00417282	1.11673	TTC39A
1921	16925689	0.7125	8.99042	6.79547	0.000149505	0.00417282	1.11641	BRWD1
1922	16812544	0.677268	8.00636	6.79299	0.000149878	0.00418106	1.11372	GOLGA6L10,GOLGA6L9,GOLGA6L4,GOLGA6L5P,GOLGA6L3,
1923	17095111	-0.605112	9.56052	-6.7924	0.000149968	0.0041814	1.11308	GNAQ
1924	16723246	-0.738783	6.55368	-6.79127	0.000150138	0.00418397	1.11185	RCN1
1925	17059872	-0.732026	4.42722	-6.78909	0.000150468	0.00419039	1.10949	SGCE
1926	16803966	0.613233	7.63041	6.78871	0.000150525	0.00419039	1.10909	UBE2Q2P2
1927	16702431	-1.02431	6.98186	-6.78732	0.000150735	0.00419407	1.10758	ECHDC3
1928	17052034	-1.06456	6.0613	-6.78658	0.000150849	0.00419506	1.10677	NA
1929	16807996	0.595812	9.25662	6.78604	0.000150931	0.00419516	1.10618	UBR1
1930	16997199	0.72975	6.57746	6.78476	0.000151125	0.00419838	1.1048	ENC1
1931	16812685	0.521045	7.95445	6.78058	0.000151762	0.00421052	1.10027	HOMER2
1932	16810974	0.917043	9.64091	6.78006	0.000151842	0.00421052	1.09971	RPL4,SNORD16,SNORD18A
1933	16810975	0.917043	9.64091	6.78006	0.000151842	0.00421052	1.09971	NA
1934	16687618	0.627475	11.7947	6.77984	0.000151876	0.00421052	1.09947	DHCR24
1935	16838107	0.540813	8.07058	6.77783	0.000152184	0.00421687	1.09729	METTL23
1936	16912116	-0.606937	5.46735	-6.77468	0.000152668	0.00422811	1.09387	SYNDIG1
1937	16995336	-1.35972	5.28273	-6.77386	0.000152795	0.00422943	1.09297	NA
1938	16891502	0.946208	4.9418	6.77226	0.000153041	0.00423404	1.09125
1939	16904917	0.685401	7.12808	6.7717	0.000153128	0.00423428	1.09063	FASTKD1
1940	17118666	1.05802	8.7027	6.76924	0.000153507	0.00424258	1.08797	RABGGTB,SNORD45B
1941	17122802	0.620866	5.36852	6.7658	0.000154042	0.00425516	1.08422	MIR646HG
1942	17020240	1.36037	5.6377	6.76526	0.000154126	0.00425529	1.08364	HMGCLL1
1943	16761663	0.686952	9.30111	6.76354	0.000154394	0.0042605	1.08177	HEBP1
1944	16727224	-0.600756	8.6004	-6.76246	0.000154562	0.00426294	1.08059	BANF1
1945	16684391	0.593631	7.39086	6.76156	0.000154702	0.00426461	1.07962	NKAIN1
1946	16817933	-0.580192	10.4	-6.76039	0.000154885	0.00426746	1.07835	PRR14
1947	16752477	0.63704	8.71426	6.756	0.000155574	0.00428425	1.07357	RPL41
1948	16665373	0.546685	9.34698	6.75533	0.00015568	0.00428494	1.07284	PATJ
1949	17016218	0.767331	7.97495	6.75371	0.000155934	0.00428975	1.07108	NA
1950	16912212	0.63997	7.06384	6.75273	0.000156088	0.00429179	1.07002	ZNF337-AS1
1951	17120806	0.736324	6.23837	6.74566	0.000157208	0.00431818	1.06232	NA
1952	16881194	-0.678317	7.63474	-6.74473	0.000157357	0.00431818	1.06131	VAX2
1953	16708402	0.735568	7.15718	6.74466	0.000157367	0.00431818	1.06124	SFXN3
1954	16898728	0.930937	8.68546	6.74464	0.00015737	0.00431818	1.06121	NA
1955	16995678	-0.629412	6.27415	-6.74275	0.000157671	0.00431828	1.05916	TTC33
1956	17123154	-0.6515	10.5655	-6.74218	0.000157762	0.00431828	1.05854	TPM4,
1957	16850328	-0.966318	6.61359	-6.74209	0.000157777	0.00431828	1.05844	MAPK8IP1P2,MAPK8IP1P1,
1958	16850334	-0.966318	6.61359	-6.74209	0.000157777	0.00431828	1.05844	MAPK8IP1P2,MAPK8IP1P1,
1959	16850360	-0.966318	6.61359	-6.74209	0.000157777	0.00431828	1.05844	MAPK8IP1P2,MAPK8IP1P1,
1960	16758163	-0.563503	9.18187	-6.74094	0.000157962	0.00432114	1.05718	SETD1B
1961	16924253	0.670063	3.76792	6.73947	0.000158196	0.00432326	1.05558
1962	17101622	0.562465	8.49325	6.73944	0.0001582	0.00432326	1.05555	OFD1
1963	17118754	0.564783	6.34764	6.73459	0.000158979	0.00433874	1.05026	CAMK1D
1964	17111998	-0.931944	6.11029	-6.73451	0.000158993	0.00433874	1.05017	ERCC6L
1965	16751996	0.851325	10.7354	6.7344	0.00015901	0.00433874	1.05006	NA
1966	17064360	-0.581026	8.54598	-6.73294	0.000159245	0.00434296	1.04846	CDK5
1967	16700630	0.607029	7.13339	6.73202	0.000159395	0.00434482	1.04746	TARBP1
1968	16654811	1.00679	6.49389	6.72976	0.00015976	0.00435256	1.04499	NA
1969	17022854	-0.575292	7.44944	-6.72812	0.000160025	0.00435412	1.04321	HDAC2
1970	16954154	0.882378	6.33064	6.72773	0.000160088	0.00435412	1.04278	AMIGO3,GMPPB
1971	16824301	-0.578432	9.93298	-6.72741	0.00016014	0.00435412	1.04243	CEP20
1972	16948087	1.15937	5.67859	6.7274	0.000160142	0.00435412	1.04242	NA
1973	16931892	-1.41377	4.51876	-6.71166	0.000162719	0.00442179	1.02523	ANKRD62P1-PARP4P3
1974	16912878	-0.554073	7.56883	-6.71094	0.000162838	0.00442179	1.02445	RALY
1975	17016369	-1.18361	5.95094	-6.7107	0.000162878	0.00442179	1.02418	H2BC3
1976	17124450	0.867812	3.82618	6.70784	0.000163351	0.0044324	1.02106	NA
1977	16983907	-0.693152	8.34461	-6.70566	0.000163715	0.00444	1.01867	BRIX1
1978	16961016	-0.72004	9.2201	-6.70349	0.000164076	0.00444555	1.0163	KPNA4
1979	17038309	-0.551967	11.83	-6.70343	0.000164085	0.00444555	1.01623	HSPA1A,HSPA1B
1980	16829426	-0.635692	9.20997	-6.70027	0.000164612	0.00445759	1.01278	DBNDD1
1981	17028653	0.679179	7.07147	6.69942	0.000164755	0.00445919	1.01185	IFITM4P
1982	16848739	-0.581377	9.4137	-6.69726	0.000165118	0.00446675	1.00948	JPT1
1983	16692168	0.69238	7.39556	6.69601	0.000165327	0.00447017	1.00811	NA
1984	16825266	-0.619883	10.6345	-6.69512	0.000165478	0.004472	1.00713	XPO6
1985	16904425	-0.608065	8.09549	-6.69395	0.000165674	0.00447504	1.00586	GRB14
1986	17071265	-0.558047	8.07319	-6.68819	0.000166649	0.00449905	0.999542	POP1
1987	16792181	-0.524792	10.6269	-6.6877	0.000166731	0.00449905	0.999012	FOXA1
1988	17021888	0.601998	8.81141	6.68579	0.000167055	0.00450553	0.99692	FBXL4
1989	16851900	-0.73483	6.97302	-6.68516	0.000167164	0.0045062	0.99622	MAPRE2
1990	16735825	-0.776133	11.7035	-6.68455	0.000167266	0.0045067	0.995559	NA
1991	16671416	-0.733777	8.44992	-6.68305	0.000167523	0.00451134	0.99391	ATP8B2
1992	16650345	1.82085	4.69074	6.68083	0.000167902	0.00451825	0.991476	NA
1993	17121608	-0.719197	8.94215	-6.68056	0.000167948	0.00451825	0.991181	ABHD17AP1,ABHD17AP3,ABHD17AP6,ABHD17A,ABHD17AP4,ABHD17AP5
1994	17071485	1.11833	4.28208	6.67869	0.000168269	0.00452427	0.989127
1995	17120868	-0.620456	9.14518	-6.67827	0.000168341	0.00452427	0.988666	CCNQP3,CCNQ
1996	16960271	0.549075	10.6439	6.67595	0.000168739	0.00453269	0.986126	HLTF
1997	17057478	-0.846312	6.595	-6.67243	0.000169346	0.0045447	0.982254	IGFBP3
1998	17123458	1.15651	4.98	6.67237	0.000169355	0.0045447	0.982198	CPHL1P
1999	16871642	-0.903127	5.96578	-6.66925	0.000169896	0.00455692	0.978768	LINC00665
[truncated: 51,618 more rows]

## Sheet: p300_shRNA2_DE Genes
	probes	logFC	AveExpr	t	P.Value	adj.P.Val	B	gene.names
1	16862563	-4.4684	7.43527	-48.016	3.61785e-11	8.10911e-07	14.586	CEACAM6
2	16981631	-3.7736	6.42219	-45.5059	5.56094e-11	8.10911e-07	14.3666	GLRA3
3	17119208	-3.65998	7.6155	-44.8473	6.24928e-11	8.10911e-07	14.3049	LINC01293
4	17059804	4.1524	9.04707	43.784	7.57237e-11	8.10911e-07	14.2012	CALCR
5	17106357	-4.07548	6.63679	-43.0476	8.67325e-11	8.10911e-07	14.1263	PLS3
6	16862548	-4.49705	7.94411	-42.805	9.07449e-11	8.10911e-07	14.1011	CEACAM5
7	16780133	-3.94429	7.78913	-41.0555	1.26708e-10	9.28885e-07	13.9105	SLITRK6
8	16755958	-4.36702	8.77562	-40.5978	1.38596e-10	9.28885e-07	13.858	ASCL1
9	16677451	3.35919	6.64442	38.5371	2.10208e-10	1.2523e-06	13.6067	KCNK2
10	16855673	3.74868	8.71823	36.2497	3.4278e-10	1.72604e-06	13.2963	BCL2
11	16755465	4.308	6.66414	36.1025	3.54111e-10	1.72604e-06	13.2751	RMST
12	16773131	3.42614	8.36724	34.6013	4.97104e-10	2.13314e-06	13.0495	SGCG
13	16908897	3.256	7.45974	34.2848	5.34955e-10	2.13314e-06	12.9997	EPHA4
14	16907979	3.27892	8.2873	33.8352	5.94398e-10	2.13314e-06	12.9276	ABCA12
15	17020846	3.30658	8.85959	33.8183	5.96771e-10	2.13314e-06	12.9248	COL12A1
16	16767991	3.1924	6.45605	32.2906	8.63026e-10	2.77832e-06	12.6663	LIN7A
17	17070456	-3.17828	8.44165	-32.2077	8.80903e-10	2.77832e-06	12.6517	CA2
18	17078870	2.46319	8.17662	31.7449	9.88688e-10	2.94503e-06	12.5688	MMP16
19	16920585	-2.53777	9.33498	-31.0334	1.18459e-09	3.34286e-06	12.4374	BMP7
20	16804449	6.20071	8.55554	30.7418	1.27721e-09	3.424e-06	12.382	LINC00052
21	16914585	-2.61473	9.86065	-30.3137	1.42824e-09	3.6004e-06	12.2992	NA
22	16947173	3.35894	6.83016	30.1855	1.47731e-09	3.6004e-06	12.274	MME
23	17120346	4.38157	8.31751	29.4666	1.79014e-09	4.01085e-06	12.1294	MALRD1
24	16958403	2.5368	8.6286	29.3178	1.86381e-09	4.01085e-06	12.0987	HEG1
25	17122122	-3.03494	8.13473	-29.3053	1.87014e-09	4.01085e-06	12.0962	LINC00665
26	17125282	3.07221	7.69723	28.6633	2.23097e-09	4.60068e-06	11.9609	PGM5P2,PGM5
27	16881863	-3.19226	7.08946	-28.0939	2.61746e-09	5.1978e-06	11.8368	LINC01291
28	16734237	-3.2595	7.14411	-26.9813	3.61006e-09	6.91289e-06	11.5825	MUC5B-AS1
29	16677556	2.91493	7.62981	26.7352	3.88302e-09	7.17917e-06	11.524	TGFB2
30	17122120	-2.63693	6.99211	-26.4178	4.26975e-09	7.41559e-06	11.4474	LINC00665
31	16734355	-2.28732	8.73779	-26.4041	4.28751e-09	7.41559e-06	11.4441	H19,MIR675
32	16762759	2.29781	7.28155	25.7696	5.20195e-09	8.60147e-06	11.2864	TMTC1
33	17121988	-2.10089	8.38147	-25.6787	5.35016e-09	8.60147e-06	11.2634	NA
34	16992530	-2.9031	9.74257	-25.4828	5.68574e-09	8.60147e-06	11.2133
35	16773113	2.54555	8.90347	25.4395	5.76298e-09	8.60147e-06	11.2021	NA
36	16690638	2.01118	7.82605	25.4327	5.77528e-09	8.60147e-06	11.2004	GSTM3
37	16912362	-2.78176	9.00379	-25.2341	6.14635e-09	8.77005e-06	11.1488	ID1
38	17121982	-2.22644	7.88128	-25.1985	6.2156e-09	8.77005e-06	11.1395
39	17021092	2.20461	7.30656	24.9579	6.70783e-09	9.22189e-06	11.0761	TENT5A
40	16773125	3.49964	7.31684	24.6867	7.31561e-09	9.80602e-06	11.0035	NA
41	16948461	-1.94023	8.7857	-24.3925	8.04605e-09	1.04405e-05	10.9234	SOX2
42	16897834	2.22023	9.69373	24.3331	8.20335e-09	1.04405e-05	10.9071	EFEMP1
43	16972663	2.18692	8.8523	24.2704	8.37312e-09	1.04405e-05	10.8898	TENM3
44	16777794	2.13276	10.4997	24.1855	8.60909e-09	1.04908e-05	10.8663	UBL3
45	16852463	-2.30005	8.74857	-24.1125	8.81822e-09	1.05068e-05	10.8459	RAB27B
46	16981099	2.046	10.4716	23.8623	9.57873e-09	1.11648e-05	10.7755	NPY1R
47	16914084	2.87357	7.72712	23.5095	1.078e-08	1.22977e-05	10.6744	CCN5
48	16691459	2.85217	6.2686	23.2918	1.16052e-08	1.29633e-05	10.611	VTCN1
49	16690343	-2.04036	6.91971	-23.2253	1.1871e-08	1.29895e-05	10.5914	VAV3
50	16702982	3.09377	5.8073	23.1146	1.23293e-08	1.29907e-05	10.5587	MALRD1
51	16998059	1.8824	9.35794	23.0416	1.26422e-08	1.29907e-05	10.537	ARRDC3
52	17080486	2.87012	6.8664	22.8834	1.33519e-08	1.29907e-05	10.4896	TNFRSF11B
53	17010782	3.2234	6.22553	22.8273	1.3614e-08	1.29907e-05	10.4727	HTR1E
54	16914469	-2.1856	9.15137	-22.8131	1.36813e-08	1.29907e-05	10.4684	SLC2A10
55	16967863	-2.15043	8.77108	-22.7535	1.39677e-08	1.29907e-05	10.4503	AREG
56	16960844	2.55695	6.57689	22.7154	1.41546e-08	1.29907e-05	10.4387	VEPH1
57	16837768	1.92592	8.48225	22.7027	1.42171e-08	1.29907e-05	10.4349	TMEM94
58	16744205	-3.9768	6.798	-22.6495	1.44842e-08	1.29907e-05	10.4187	ARHGAP20
59	17066065	1.87887	10.8949	22.6018	1.47277e-08	1.29907e-05	10.4041	SLC7A2
60	17018841	2.95124	7.47326	22.5068	1.52274e-08	1.29907e-05	10.3749	KCNK5
61	16702379	2.34532	8.21978	22.4374	1.56047e-08	1.29907e-05	10.3535
62	17121980	-1.91298	7.59689	-22.4316	1.56366e-08	1.29907e-05	10.3517
63	16970118	4.12923	6.20094	22.4187	1.57078e-08	1.29907e-05	10.3477	SYNPO2
64	17069816	1.72328	8.71731	22.4125	1.57425e-08	1.29907e-05	10.3458	SULF1
65	17121984	-2.27642	7.93638	-22.4114	1.57486e-08	1.29907e-05	10.3454
66	16729693	-2.47206	6.9756	-22.2705	1.6555e-08	1.34489e-05	10.3016	CCDC83
67	17087109	2.79574	7.35638	22.1895	1.70392e-08	1.36357e-05	10.2762	MIR23B,MIR27B
68	16675045	2.15698	7.9153	22.1084	1.75407e-08	1.38306e-05	10.2506	HMCN1
69	16847095	2.99337	7.57106	21.9909	1.82966e-08	1.41523e-05	10.2133	,RNF43
70	17112149	3.15176	7.93018	21.9285	1.87124e-08	1.41523e-05	10.1935	XIST
71	16765542	-1.99497	7.21354	-21.8918	1.89623e-08	1.41523e-05	10.1817	ZNF385A
72	17012304	-2.1696	9.00518	-21.8856	1.90046e-08	1.41523e-05	10.1797	HEY2
73	16678651	-2.06961	6.84525	-21.81	1.95321e-08	1.4346e-05	10.1555	CAPN9
74	16707009	1.73565	8.58567	21.7357	2.00671e-08	1.45397e-05	10.1315	PAPSS2
75	16826586	1.97106	8.70498	21.5842	2.12082e-08	1.49678e-05	10.0823	IRX3
76	16748565	1.95679	9.10863	21.562	2.13819e-08	1.49678e-05	10.075	FAM234B
77	17013520	-2.11648	7.56645	-21.5476	2.14955e-08	1.49678e-05	10.0703	SASH1
78	16819082	1.7239	8.14391	21.4206	2.25237e-08	1.53495e-05	10.0286	LPCAT2
79	16814584	-2.13966	8.06537	-21.4095	2.26162e-08	1.53495e-05	10.0249	CACNA1H
80	16667999	-1.65981	7.97785	-21.2154	2.43054e-08	1.60887e-05	9.96042
81	16690424	-1.65981	7.97785	-21.2154	2.43054e-08	1.60887e-05	9.96042
82	16877968	-2.34132	6.5768	-21.154	2.4869e-08	1.62604e-05	9.93985	DPYSL5
83	17122488	2.38302	7.93759	21.1038	2.53397e-08	1.62604e-05	9.923	CYTOR,,MIR4435-2HG
84	16856350	-2.32927	9.17721	-21.0897	2.54747e-08	1.62604e-05	9.91823	CNN2
85	16719025	2.59014	6.56155	20.9726	2.66209e-08	1.66839e-05	9.87861	FGFR2
86	17078995	2.63899	6.44448	20.9587	2.67605e-08	1.66839e-05	9.8739
87	16720601	-2.55152	7.59013	-20.833	2.80633e-08	1.72951e-05	9.831	MUC5B
88	16717290	1.80383	7.82237	20.6734	2.98207e-08	1.81693e-05	9.77606	PYROXD2
89	16886961	1.83185	7.20011	20.5211	3.16152e-08	1.89467e-05	9.72304	SLC4A10
90	16886174	2.13192	8.81398	20.4819	3.20961e-08	1.89467e-05	9.70932	KYNU
91	17064810	-1.96025	8.14422	-20.4702	3.22402e-08	1.89467e-05	9.70525	SHH
92	17059491	2.63142	5.99825	20.4487	3.25101e-08	1.89467e-05	9.69767	ABCB1
93	16900875	1.7808	8.12195	20.3439	3.38554e-08	1.95186e-05	9.66075	MGAT4A
94	17122114	-2.36453	6.41578	-20.0472	3.80185e-08	2.16855e-05	9.55477	LINC00665
95	17121986	-1.96209	7.39259	-20.0081	3.86088e-08	2.17904e-05	9.54065
96	16987773	-4.61543	5.98928	-19.9564	3.94052e-08	2.20082e-05	9.52192	LINC02163
97	16983373	-2.0352	6.56935	-19.7857	4.21678e-08	2.33084e-05	9.45965	OTULINL
98	17000168	2.04101	7.56704	19.7186	4.33126e-08	2.36081e-05	9.43498	CXCL14
99	16796652	1.64301	9.1111	19.6684	4.41919e-08	2.36081e-05	9.41645	DEGS2
100	17122500	1.84348	7.65685	19.6636	4.42782e-08	2.36081e-05	9.41465	CYTOR,,MIR4435-2HG
101	16967853	-2.10008	8.11674	-19.6385	4.47249e-08	2.36081e-05	9.40539	AREG
102	17122656	1.55424	7.8801	19.6282	4.49116e-08	2.36081e-05	9.40155	CYTOR,MIR4435-2HG
103	16981824	2.12757	5.76378	19.5033	4.723e-08	2.45857e-05	9.35504	NA
104	16986913	-1.93662	5.28089	-19.4735	4.78025e-08	2.46445e-05	9.34389	VCAN
105	16992537	-1.69774	6.42727	-19.2378	5.26168e-08	2.68681e-05	9.2549
106	17079530	1.62383	7.86155	19.1083	5.54925e-08	2.80693e-05	9.20539	COX6C
107	16851191	-1.49189	6.96753	-19.0075	5.78542e-08	2.89904e-05	9.16654	LDLRAD4
108	17122116	-2.33895	7.63138	-18.8883	6.07908e-08	2.9903e-05	9.1203	LINC00665
109	17122118	-2.33895	7.63138	-18.8883	6.07908e-08	2.9903e-05	9.1203	LINC00665
110	16676183	1.75266	7.41231	18.8189	6.25795e-08	3.01798e-05	9.09318	ATP2B4
111	16855358	-1.76419	4.89461	-18.7702	6.38692e-08	3.01798e-05	9.07407	CCDC68
112	17094814	1.57934	8.43699	18.7549	6.42813e-08	3.01798e-05	9.06805	CEMIP2
113	16955815	-3.76536	7.59097	-18.7232	6.51411e-08	3.01798e-05	9.0556	NA
114	16684080	2.67551	8.45764	18.7	6.57794e-08	3.01798e-05	9.04645	IFI6
115	17059826	2.5592	5.55423	18.6954	6.59077e-08	3.01798e-05	9.04462	MIR489
116	16904410	-2.20752	7.46238	-18.6577	6.69629e-08	3.01798e-05	9.02972	FIGN
117	16880712	1.83547	7.45478	18.6548	6.70452e-08	3.01798e-05	9.02857	SLC1A4
118	17122492	1.73451	7.60604	18.6007	6.85964e-08	3.01798e-05	9.00709	CYTOR,,MIR4435-2HG
119	16873645	-2.83987	10.813	-18.5996	6.86278e-08	3.01798e-05	9.00666	NA
120	17119138	-2.83987	10.813	-18.5996	6.86278e-08	3.01798e-05	9.00666	NA
121	17119142	-2.83987	10.813	-18.5996	6.86278e-08	3.01798e-05	9.00666	NA
122	16995177	1.83584	9.59902	18.5981	6.8671e-08	3.01798e-05	9.00607	PRLR
123	16879067	1.94156	8.62659	18.5591	6.98143e-08	3.04328e-05	8.99055	CRIM1
124	17048190	-2.33848	6.64906	-18.3522	7.62506e-08	3.29232e-05	8.90751	CDK14
125	16688999	1.58036	5.96455	18.3368	7.67555e-08	3.29232e-05	8.90128	MCOLN2
126	16953944	1.54134	8.85278	18.2891	7.83435e-08	3.31034e-05	8.88195	LAMB2
127	17016406	1.50937	8.1877	18.2871	7.84105e-08	3.31034e-05	8.88114	H4C8
128	16992534	-1.95313	7.12854	-18.2215	8.06598e-08	3.35618e-05	8.85442
129	16994618	-1.49001	8.24667	-18.2189	8.07481e-08	3.35618e-05	8.85338	MYO10
130	16744918	1.59221	6.78113	18.1668	8.25889e-08	3.38917e-05	8.83206	TMPRSS13
131	16754729	1.81037	8.19543	18.1607	8.2806e-08	3.38917e-05	8.82958	ACSS3
132	17075553	1.39258	11.1608	18.139	8.35888e-08	3.39529e-05	8.82067	STC1
133	17010760	4.15227	6.16647	18.0169	8.8146e-08	3.55348e-05	8.77036	NT5E
134	17106438	-2.13327	5.54311	-17.9629	9.02476e-08	3.6041e-05	8.748	DOCK11
135	16835356	1.42458	9.90282	17.9503	9.07462e-08	3.6041e-05	8.74277	,CDK5RAP3
136	16975333	-1.36171	10.1465	-17.8548	9.46335e-08	3.73085e-05	8.70291	SMIM14
137	16914588	-2.48076	7.02792	-17.8372	9.53662e-08	3.7323e-05	8.69557	NA
138	17057460	2.10057	6.85431	17.7557	9.88622e-08	3.84108e-05	8.6613	TBRG4,SNORA5A,SNORA5C
139	17114139	1.54197	7.19609	17.6061	1.05649e-07	4.0692e-05	8.59797	IGSF1
140	16980096	1.33258	10.6582	17.59	1.06413e-07	4.0692e-05	8.59108	TBC1D9
141	16743432	1.98693	6.29591	17.563	1.07705e-07	4.0692e-05	8.57955	SESN3
142	17121860	1.48878	5.10022	17.5616	1.07769e-07	4.0692e-05	8.57898
143	17122650	1.74583	7.47989	17.4641	1.12586e-07	4.22133e-05	8.53717	CYTOR,,MIR4435-2HG
144	16756649	2.01172	7.00019	17.3429	1.18909e-07	4.41135e-05	8.48481	ACACB
145	16875114	-2.46166	6.99075	-17.3212	1.20079e-07	4.41135e-05	8.47542	ZNF888
146	16894911	-1.72747	8.79079	-17.3087	1.20765e-07	4.41135e-05	8.46996	SDC1
147	16703036	1.4649	10.2813	17.2763	1.22553e-07	4.41135e-05	8.45585	PLXDC2
148	16998532	1.53222	8.72364	17.2451	1.24302e-07	4.41135e-05	8.44224	ST8SIA4
149	17095423	-1.67301	7.26258	-17.2439	1.24369e-07	4.41135e-05	8.44172	GOLM1
150	16874508	-2.69644	10.5857	-17.2438	1.24376e-07	4.41135e-05	8.44167	NA
151	16874510	-2.69644	10.5857	-17.2438	1.24376e-07	4.41135e-05	8.44167	NA
152	17062321	-1.90478	8.49282	-17.2317	1.25058e-07	4.41135e-05	8.43641	CADPS2
153	16883376	1.70299	5.40129	17.121	1.31542e-07	4.60973e-05	8.38781	NA
154	17106398	1.80604	10.7638	17.0718	1.34541e-07	4.68422e-05	8.3661	SLC6A14
155	16826692	1.39327	10.7268	16.9788	1.40431e-07	4.85773e-05	8.32481	AMFR
156	17102829	1.37505	6.73003	16.9619	1.41533e-07	4.86447e-05	8.31727	MAOA
157	17011302	1.54216	8.92509	16.8975	1.45812e-07	4.90929e-05	8.28851	CRYBG1
158	16863715	-2.5789	10.5013	-16.8973	1.45826e-07	4.90929e-05	8.28842	NA
159	16863719	-2.5789	10.5013	-16.8973	1.45826e-07	4.90929e-05	8.28842	NA
160	16958356	1.59182	9.44452	16.8746	1.4737e-07	4.90929e-05	8.27825	ITGB5
161	16950396	-2.43399	4.47478	-16.8739	1.47415e-07	4.90929e-05	8.27795
162	16967513	-2.1048	4.72523	-16.7439	1.56625e-07	5.18382e-05	8.21934	AMTN
163	17095098	-1.45372	7.27863	-16.7256	1.57968e-07	5.19617e-05	8.21107	GNA14
164	16864553	1.6048	8.75652	16.7044	1.59551e-07	5.21626e-05	8.20141	EMC10
165	16812925	2.95685	4.78977	16.6256	1.65564e-07	5.38004e-05	8.16555
166	16849576	1.80675	9.35594	16.5949	1.67977e-07	5.41934e-05	8.15152	LGALS3BP
167	16682333	1.8031	5.63156	16.5729	1.69731e-07	5.41934e-05	8.14144	MFAP2
168	16764817	-2.30785	7.58992	-16.572	1.69806e-07	5.41934e-05	8.14101	KRT81
169	16743009	2.07632	7.50926	16.514	1.74525e-07	5.537e-05	8.11439
170	16966026	-1.52854	7.48047	-16.4841	1.77025e-07	5.58325e-05	8.10057	FAM114A1
171	16802903	-1.60221	7.74522	-16.4553	1.79458e-07	5.60243e-05	8.0873	LOXL1
172	17122474	2.14086	5.924	16.4522	1.79723e-07	5.60243e-05	8.08586	CYTOR,,MIR4435-2HG
173	16906308	2.92491	5.34102	16.4135	1.83067e-07	5.6737e-05	8.06793	TFPI
174	17104893	-1.59601	5.40654	-16.3584	1.87944e-07	5.79139e-05	8.04233	PABPC1L2B
175	16984287	-2.239	6.73125	-16.3188	1.9154e-07	5.86846e-05	8.02387	PTGER4
176	16793803	1.4767	4.59586	16.2481	1.98163e-07	6.03687e-05	7.99073
177	16983451	1.30672	10.6297	16.176	2.05172e-07	6.19943e-05	7.9568	BASP1
178	16728778	1.59059	8.45657	16.1695	2.05811e-07	6.19943e-05	7.95376	P2RY2
179	16848070	1.25446	9.89027	16.1182	2.10996e-07	6.32009e-05	7.92946	SLC16A6
180	16917061	-1.77568	6.97547	-16.1013	2.12724e-07	6.32564e-05	7.92148	FERMT1
181	16977868	2.8506	7.91272	16.0901	2.13885e-07	6.32564e-05	7.91616	ABCG2
182	17020258	2.3153	5.54805	16.0821	2.14721e-07	6.32564e-05	7.91235	BMP5
183	16702285	-1.59107	5.52552	-16.0601	2.17028e-07	6.34076e-05	7.90189	ITIH2
184	17120920	1.90171	6.18692	16.0501	2.1809e-07	6.34076e-05	7.89712	TPTE2P2,
185	17063005	1.7774	6.63127	16.0398	2.19188e-07	6.34076e-05	7.8922	PLXNA4
186	16863705	-1.75155	8.27907	-16.0106	2.22329e-07	6.34076e-05	7.87827	NA
187	16863711	-1.75155	8.27907	-16.0106	2.22329e-07	6.34076e-05	7.87827	NA
188	16863721	-1.75155	8.27907	-16.0106	2.22329e-07	6.34076e-05	7.87827	NA
189	17069063	-1.96443	7.4164	-15.9946	2.24077e-07	6.3568e-05	7.87061	LYN
190	17070082	1.48217	7.19173	15.9532	2.28653e-07	6.45248e-05	7.8508	GDAP1
191	16790614	1.27346	7.74048	15.9039	2.34248e-07	6.51335e-05	7.82711	AJUBA
192	17059323	-1.38659	4.62746	-15.9021	2.34455e-07	6.51335e-05	7.82625	SEMA3A
193	16724178	-1.67327	7.89176	-15.9021	2.34455e-07	6.51335e-05	7.82624	SLC35C1
194	16851964	1.53153	9.72871	15.8441	2.41246e-07	6.66748e-05	7.79823	ELP2
195	17083319	1.22243	8.75412	15.7953	2.47128e-07	6.69313e-05	7.77458	JAK2
196	16996433	1.64977	9.90961	15.794	2.47283e-07	6.69313e-05	7.77397	PLK2
197	16836655	1.53473	7.89	15.7822	2.48729e-07	6.69313e-05	7.76824	CA4
198	17090296	1.40821	10.2386	15.7657	2.50767e-07	6.69313e-05	7.76022	ASS1
199	17122660	1.44032	8.14238	15.7567	2.51895e-07	6.69313e-05	7.75581	CYTOR,MIR4435-2HG
200	17031720	1.70893	7.76436	15.7545	2.52161e-07	6.69313e-05	7.75477	CDSN
201	17034172	1.70893	7.76436	15.7545	2.52161e-07	6.69313e-05	7.75477	CDSN
202	17036422	1.70893	7.76436	15.7545	2.52161e-07	6.69313e-05	7.75477	CDSN
203	16961039	-1.25712	8.25916	-15.6955	2.59658e-07	6.84039e-05	7.72597	B3GALNT1
204	16874512	-2.25597	8.70346	-15.687	2.60754e-07	6.84039e-05	7.72183	NA
205	16975310	-1.27843	11.9743	-15.6653	2.63594e-07	6.84039e-05	7.71117	UGDH
206	16720085	1.60123	8.70063	15.6632	2.63863e-07	6.84039e-05	7.71017	IFITM1
207	16899476	-2.81048	7.72811	-15.6588	2.64444e-07	6.84039e-05	7.708	NA
208	16824109	-2.33995	7.02916	-15.6519	2.65364e-07	6.84039e-05	7.70458	PLA2G10
209	16703563	1.26582	10.623	15.6241	2.69064e-07	6.90259e-05	7.69095	BAMBI
210	16777571	1.69734	7.75422	15.5486	2.79425e-07	7.13427e-05	7.65373	SHISA2
211	16703659	1.79855	6.04508	15.5264	2.82557e-07	7.18004e-05	7.64274	NA
212	16707202	1.43179	7.23662	15.4058	3.00279e-07	7.59438e-05	7.5827	IFIT5
213	16714725	-1.7325	6.72475	-15.3611	3.07155e-07	7.70618e-05	7.56033	TMEM26
214	17122506	1.75089	8.95943	15.3584	3.07574e-07	7.70618e-05	7.55899	CYTOR,MIR4435-2HG,
215	17119976	-1.29609	6.4887	-15.3155	3.14359e-07	7.79398e-05	7.53741
216	16863041	-1.27978	8.90149	-15.3145	3.14517e-07	7.79398e-05	7.53692	BCL3
217	16858519	-1.7167	4.55872	-15.3087	3.1544e-07	7.79398e-05	7.53402	ZNF441
218	16785379	-1.30911	7.63433	-15.2261	3.29031e-07	8.0925e-05	7.49227	HSPA2
219	17122652	1.49255	7.07312	15.1983	3.33749e-07	8.14471e-05	7.47817	CYTOR,,MIR4435-2HG
220	16903186	-1.83229	6.09288	-15.1957	3.34192e-07	8.14471e-05	7.47685	LRP1B
221	17096728	-1.34927	5.86607	-15.1857	3.35906e-07	8.14944e-05	7.47178	ABCA1
222	16920762	1.35397	6.82944	15.157	3.40899e-07	8.20152e-05	7.45716	CTSZ
223	16801789	1.31186	7.91361	15.1515	3.41856e-07	8.20152e-05	7.45438	NA
224	16937137	1.66071	7.69989	15.147	3.42642e-07	8.20152e-05	7.4521	LMCD1
225	16895179	1.53385	7.24513	15.1242	3.46685e-07	8.26142e-05	7.44047	TP53I3
226	16871359	1.30876	7.56198	15.1008	3.5089e-07	8.32464e-05	7.42851	DMKN
227	17122508	1.71698	8.68124	15.0905	3.5276e-07	8.33214e-05	7.42324	CYTOR,MIR4435-2HG,
228	16942425	-1.40742	6.33826	-15.0698	3.56551e-07	8.38474e-05	7.41263
229	16688210	2.38112	5.94145	15.0396	3.62172e-07	8.47973e-05	7.3971	MIR3671,MIR101-1
230	17111725	1.57734	7.71863	14.9989	3.69884e-07	8.57418e-05	7.37618	EDA2R
231	16783265	1.71935	5.30683	14.9937	3.70883e-07	8.57418e-05	7.3735	NPAS3
232	17122662	1.4984	8.23764	14.9931	3.71004e-07	8.57418e-05	7.37317	CYTOR,MIR4435-2HG
233	16654665	1.23596	9.58834	14.9829	3.72977e-07	8.58278e-05	7.3679	NA
234	16762146	-1.87229	6.14483	-14.9456	3.80273e-07	8.7133e-05	7.34864	KCNJ8
235	16891403	1.73227	6.38303	14.9056	3.88301e-07	8.85938e-05	7.32787	INHA
236	16941809	1.37451	6.80415	14.8759	3.94368e-07	8.95968e-05	7.31244	CACNA1D
237	16851383	-1.54312	8.41869	-14.8658	3.96456e-07	8.9691e-05	7.30719	GATA6
238	17047560	-1.85123	8.09709	-14.8135	4.07467e-07	9.15191e-05	7.27991	UPK3B
239	17085722	1.19564	8.63297	14.804	4.09503e-07	9.15191e-05	7.27494	FAM189A2
240	16803197	1.4005	6.64018	14.8005	4.10276e-07	9.15191e-05	7.27306	NEIL1
241	17121440	-1.80241	6.65957	-14.7882	4.12918e-07	9.15191e-05	7.26667	PLA2G10,
242	16686827	1.85438	5.89977	14.7875	4.13071e-07	9.15191e-05	7.2663	LINC01389
243	16690388	-1.20715	10.9175	-14.7592	4.19284e-07	9.25133e-05	7.25142	SLC25A24
244	17121978	-2.03056	7.38025	-14.7328	4.25152e-07	9.31866e-05	7.23756
245	17117909	1.85456	6.79988	14.7299	4.25811e-07	9.31866e-05	7.23602	LINC01522,LINC00494
246	16946280	1.88119	7.77994	14.6907	4.34711e-07	9.47475e-05	7.21538	CLSTN2
247	16800450	1.34393	8.2567	14.671	4.39285e-07	9.53569e-05	7.20494	B2M
248	16870200	1.83317	4.86111	14.6592	4.42025e-07	9.55648e-05	7.19873	BST2
249	16712277	-1.20997	8.2205	-14.645	4.45383e-07	9.59039e-05	7.19118	ST8SIA6
250	16732584	1.53307	6.04602	14.5885	4.58954e-07	9.84309e-05	7.16119	SORL1
251	16718263	1.82256	5.93763	14.5395	4.71104e-07	0.000100634	7.13508	SORCS1
252	16675638	-1.75646	6.6549	-14.5137	4.77663e-07	0.00010163	7.12125	NR5A2
253	16848902	1.09101	8.14027	14.4681	4.89472e-07	0.000103731	7.09681	UNC13D
254	16788296	-1.39438	8.57468	-14.4472	4.94996e-07	0.000104199	7.08558	EML1
255	17122496	2.00217	7.27874	14.4451	4.95568e-07	0.000104199	7.08442	CYTOR,,MIR4435-2HG
256	16713530	1.28974	7.65391	14.4073	5.05737e-07	0.000105922	7.06408	CXCL12
257	16746696	1.29053	8.62021	14.3744	5.14801e-07	0.000107401	7.04628	ADIPOR2
258	16962316	-1.43533	6.54728	-14.363	5.17969e-07	0.000107643	7.04014	LIPH
259	16801862	1.31526	6.96886	14.2711	5.44438e-07	0.000111875	6.99015	APH1B
260	16902945	1.2948	6.50317	14.2708	5.44527e-07	0.000111875	6.98999	NCKAP5
261	16990862	1.16744	5.88398	14.2561	5.48906e-07	0.000111875	6.98195	ABLIM3
262	16666545	2.13058	6.16068	14.2535	5.4967e-07	0.000111875	6.98055	ADGRL2
263	16962602	-1.59285	6.21987	-14.2517	5.50198e-07	0.000111875	6.97959	NA
264	16689354	1.97921	5.70139	14.2433	5.52721e-07	0.000111875	6.97499	GBP2
265	17110040	-1.17681	5.60978	-14.2426	5.52937e-07	0.000111875	6.9746	TMEM47
266	16668002	1.10762	10.7995	14.2323	5.56066e-07	0.000112085	6.96894	FAM102B
267	17122510	1.43868	8.72764	14.2228	5.58949e-07	0.000112244	6.96374	CYTOR,MIR4435-2HG,
268	16794705	1.19061	10.0291	14.2098	5.62926e-07	0.000112621	6.95663	NPC2,MIR4709
269	17089549	2.46271	7.31713	14.19	5.69037e-07	0.00011342	6.94578	DNM1
270	16957095	1.26295	10.4838	14.1712	5.74927e-07	0.00011417	6.93543	CD47
271	17106183	1.27637	9.90664	14.081	6.0411e-07	0.000119522	6.88565	TMEM164
272	17075973	-1.70602	6.89433	-13.9352	6.54829e-07	0.000129081	6.80446	DUSP4
273	17001100	1.5949	7.45684	13.9108	6.63784e-07	0.000130367	6.79076	NR3C1
274	16751999	1.63494	9.59998	13.9008	6.67503e-07	0.000130619	6.78513	NA
275	17114272	1.7329	7.80719	13.8141	7.0063e-07	0.000136056	6.73625	GPC4
276	16673191	1.08899	8.4089	13.8111	7.01781e-07	0.000136056	6.73459	PBX1
277	17082982	1.51151	6.4454	13.8083	7.02905e-07	0.000136056	6.73298	DOCK8
278	17105249	-1.3481	3.2744	-13.8006	7.05945e-07	0.000136153	6.72862	PCDH11X
279	17014562	-1.10528	7.08848	-13.7837	7.12672e-07	0.000136863	6.71904	QKI
280	16712435	-1.14627	6.54285	-13.7731	7.16916e-07	0.000136863	6.71304	MIR1915HG,MIR1915
281	17084669	1.95722	6.75599	13.7722	7.17284e-07	0.000136863	6.71253	RUSC2
282	16654685	1.3785	8.65001	13.7565	7.23643e-07	0.000137549	6.70361	NA
283	16652569	-1.25479	6.86234	-13.7484	7.2695e-07	0.000137549	6.699	NA
284	16816497	-1.11417	8.8746	-13.744	7.28768e-07	0.000137549	6.69648	VPS35L
285	17017900	-1.643	8.15749	-13.7328	7.33376e-07	0.000137549	6.69011	HLA-DRB1
286	17110289	2.07568	5.08842	13.732	7.33706e-07	0.000137549	6.68965	MAOB
287	16830041	1.4385	8.11051	13.7168	7.40007e-07	0.000138247	6.68101	ZFP3
288	16708728	-1.05089	10.2881	-13.6924	7.50279e-07	0.000139581	6.66707	SFXN2
289	16787882	1.66825	6.48056	13.6852	7.5333e-07	0.000139581	6.66297	SERPINA5
290	16656951	1.83045	3.34517	13.6772	7.56758e-07	0.000139581	6.65838	NA
291	16984689	1.34998	8.7513	13.6753	7.57562e-07	0.000139581	6.6573	ITGA2
292	17061662	2.63704	5.99301	13.6617	7.63433e-07	0.000140181	6.64949	LAMB1
293	16667914	1.57201	5.48887	13.6418	7.7209e-07	0.000141252	6.63808	LINC01661
294	17113293	1.52283	5.58145	13.6346	7.75223e-07	0.000141252	6.63398	ACSL4
295	16817254	-1.11554	8.0417	-13.6276	7.78329e-07	0.000141252	6.62994	IL4R
296	16804228	1.64452	7.20364	13.6242	7.798e-07	0.000141252	6.62803	SCAND2P
297	16768341	1.398	10.4393	13.6085	7.86815e-07	0.000142043	6.61896	ATP2B1
298	17059824	2.87883	4.3398	13.596	7.9241e-07	0.000142573	6.61179	MIR653
299	16972076	1.69717	5.98954	13.5879	7.96058e-07	0.00014275	6.60714	NPY5R
300	17070120	1.41994	5.75751	13.5781	8.00508e-07	0.000143069	6.60149	CRISPLD1
301	16875108	-3.24233	5.40953	-13.5492	8.13815e-07	0.000144965	6.58479	ZNF320
302	16687208	2.06179	5.36965	13.5408	8.17749e-07	0.000145183	6.57991	TUT4
303	16751190	1.20817	7.06981	13.5192	8.27894e-07	0.000146315	6.56741	METTL7A
304	16900635	1.07393	9.0113	13.5156	8.29586e-07	0.000146315	6.56534	SEMA4C
305	17022887	-2.02265	5.55085	-13.4951	8.39384e-07	0.000147558	6.55344	HS3ST5
306	17118880	1.69095	5.54898	13.4837	8.44893e-07	0.000148041	6.54681	LINC00173
307	16749316	1.35131	7.12972	13.4536	8.59576e-07	0.000150123	6.52933	RASSF8
308	17115271	1.35589	7.52542	13.437	8.67805e-07	0.000151069	6.51967	L1CAM
309	16835672	1.16728	8.79161	13.3564	9.09095e-07	0.00015744	6.47248	ITGA3
310	16744616	1.20419	4.8104	13.3517	9.1159e-07	0.00015744	6.4697	NA
311	16654667	1.21923	8.87991	13.3486	9.13217e-07	0.00015744	6.46789	NA
312	16692918	1.15969	8.09543	13.33	9.23068e-07	0.000158552	6.45699	MINDY1
313	16803212	1.34557	7.46064	13.3254	9.2558e-07	0.000158552	6.45423	SNX33
314	16668997	-2.26115	6.71173	-13.3186	9.29225e-07	0.00015867	6.45023	HIPK1,OLFML3
315	16891502	1.53428	5.19384	13.2981	9.40343e-07	0.000159709	6.43815
316	17106102	2.09871	5.65559	13.2964	9.4127e-07	0.000159709	6.43715	COL4A5
317	17117463	2.57545	7.14401	13.2897	9.44913e-07	0.000159821	6.43322	PLXDC2
318	16827041	2.34407	6.63828	13.2779	9.51415e-07	0.000160033	6.42625	CDH11
319	16964027	-1.4594	7.23154	-13.2766	9.52134e-07	0.000160033	6.42548	FGFR3
320	17121276	1.43681	6.84036	13.269	9.5636e-07	0.000160241	6.42098	GOLGA8R,GOLGA8Q,GOLGA8O,GOLGA8N
321	16768270	1.30509	8.09263	13.254	9.64742e-07	0.000161142	6.41211	KITLG
322	16991010	2.82616	6.9888	13.218	9.85193e-07	0.000163736	6.39077	SLC26A2
323	17016110	1.10293	9.55762	13.2089	9.90425e-07	0.000163736	6.38538	DCDC2
324	16656999	1.67051	6.21553	13.2065	9.91856e-07	0.000163736	6.38391	NA
325	17121282	1.11087	8.47684	13.202	9.94468e-07	0.000163736	6.38123	GOLGA8A,GOLGA8B
326	17070713	1.10045	9.07339	13.2001	9.95542e-07	0.000163736	6.38014	NECAB1
327	17005223	-2.85512	5.98941	-13.1887	1.00223e-06	0.000164084	6.37332	ID4
328	16713187	1.10817	9.50206	13.1838	1.0051e-06	0.000164084	6.37042	NRP1
329	16847771	1.35385	7.65065	13.1808	1.00684e-06	0.000164084	6.36865	ERN1
330	16761811	-1.5845	6.45469	-13.1726	1.01169e-06	0.000164374	6.36376	ART4
331	16862188	1.18394	9.37533	13.1609	1.01865e-06	0.000165006	6.35678	PLD3
332	17014846	1.37233	7.57947	13.1545	1.02246e-06	0.000165124	6.35298	ERMARD
333	16966008	-1.23186	8.58158	-13.125	1.04034e-06	0.000167507	6.33533	KLF3
334	16977378	1.10762	10.4253	13.0785	1.06919e-06	0.000171318	6.30745	TMEM150C
335	16943548	-1.32546	8.84817	-13.0729	1.07274e-06	0.000171318	6.30407	ALCAM
336	16877559	1.83177	5.33923	13.0715	1.07359e-06	0.000171318	6.30327
337	17090320	1.52506	8.92474	13.0447	1.09076e-06	0.000173541	6.28709	NA
338	16912472	-1.44127	7.15533	-13.0329	1.09838e-06	0.000174237	6.27999	HCK
339	16805161	1.55481	7.2588	12.9887	1.12749e-06	0.000178112	6.25332	SLCO3A1
340	16920006	1.83705	8.34426	12.9838	1.13078e-06	0.000178112	6.25034	LINC01522
341	16704865	-2.08322	7.40061	-12.9808	1.13278e-06	0.000178112	6.24854	MSMB
342	16718687	-1.1889	6.42055	-12.9629	1.14489e-06	0.000179114	6.23769	C10orf82
343	17085610	1.96016	5.7689	12.9534	1.15138e-06	0.000179114	6.23192	PGM5
344	16907488	1.06449	8.39123	12.9485	1.15473e-06	0.000179114	6.22895	RAPH1
345	16811762	1.07739	8.27294	12.9479	1.15517e-06	0.000179114	6.22856	MAN2C1
346	16866946	-1.28889	9.60867	-12.9469	1.15585e-06	0.000179114	6.22796	TIMM13,LMNB2
347	17120266	-1.19324	6.83438	-12.9381	1.16189e-06	0.00017953	6.22264	SLC25A24P1
348	16863307	-1.10969	9.74994	-12.9141	1.17863e-06	0.000181594	6.20803	VASP
349	16766420	-1.0865	7.20099	-12.8994	1.189e-06	0.000182535	6.19908	STAT6
350	17088957	-1.14146	8.28881	-12.8959	1.19155e-06	0.000182535	6.1969	NA
351	16669087	-1.33679	6.74491	-12.8601	1.21726e-06	0.0001859	6.17509	SLC22A15
352	17043727	-1.49291	7.43352	-12.8543	1.2215e-06	0.0001859	6.17154	SCIN
353	16850923	-1.02865	11.2657	-12.8467	1.2271e-06	0.0001859	6.16686	RAB31
354	16817630	1.40465	8.17859	12.8408	1.23146e-06	0.0001859	6.16324	QPRT
355	16685330	1.00252	6.84807	12.8371	1.2342e-06	0.0001859	6.16096	GRIK3
356	17015862	-1.31704	7.98115	-12.8369	1.23432e-06	0.0001859	6.16087	ATXN1
357	17056896	1.11098	8.65364	12.804	1.25897e-06	0.000189081	6.14065	VPS41
358	16888106	-1.18501	7.43572	-12.7926	1.26758e-06	0.000189842	6.13368	OSBPL6
359	16777278	-1.02265	9.82335	-12.7856	1.27298e-06	0.000190121	6.12933	SKA3
360	16763060	-1.55822	7.55726	-12.7556	1.29616e-06	0.000193045	6.11087	SYT10
361	16879500	-1.08487	7.23782	-12.7463	1.30348e-06	0.000193597	6.10511	PLEKHH2
362	16846093	1.33061	7.55175	12.7404	1.30815e-06	0.000193754	6.10145	OSBPL7
363	17102041	-1.12052	10.3209	-12.7304	1.31603e-06	0.000194385	6.0953	SMS
364	16985440	1.18625	7.98271	12.7158	1.32768e-06	0.000195566	6.08629	MAST4
365	17070485	-2.84277	4.53414	-12.7007	1.33992e-06	0.000196829	6.07689
366	16751269	1.22711	5.47172	12.6436	1.38712e-06	0.000203205	6.04143	NA
367	17030188	1.03784	9.57988	12.6344	1.39493e-06	0.000203793	6.03567	HLA-A
368	17122646	1.57659	5.4594	12.6252	1.40275e-06	0.000204378	6.02995	CYTOR,MIR4435-2HG
369	17122658	1.44827	7.40601	12.6111	1.41487e-06	0.000205586	6.02113	CYTOR,MIR4435-2HG
370	16662636	-2.16168	6.58282	-12.5891	1.43396e-06	0.000207585	6.0074	DNALI1
371	16918679	1.23361	7.17307	12.5863	1.43637e-06	0.000207585	6.00567	MMP24OS,
372	16805145	1.82765	4.60148	12.5689	1.45171e-06	0.000209192	5.99478
373	16911283	1.01326	8.86049	12.5614	1.45838e-06	0.000209192	5.99008	PLCB1
374	16920047	-1.03869	11.0681	-12.5585	1.46103e-06	0.000209192	5.98821	PREX1
375	17035049	1.06194	10.5288	12.5562	1.4631e-06	0.000209192	5.98676	HLA-A
376	16836375	1.08681	9.5485	12.4956	1.51844e-06	0.00021542	5.94868	MSI2
377	16977159	1.05643	7.05585	12.4956	1.51846e-06	0.00021542	5.94866	SOWAHB
378	16838392	1.00049	8.11304	12.4915	1.52232e-06	0.00021542	5.94606	PGS1
379	17028037	1.00386	9.38155	12.4862	1.52726e-06	0.00021542	5.94273	,SNHG32,SNORD52
380	16812803	1.00032	7.99997	12.4767	1.5362e-06	0.00021542	5.93674	WDR73
381	17124702	1.28559	6.82525	12.4749	1.53787e-06	0.00021542	5.93563	SEPTIN7P2
382	17086208	-1.66655	6.59193	-12.4682	1.54427e-06	0.00021542	5.93136	NA
383	17016043	-0.99595	10.7574	-12.4626	1.54957e-06	0.00021542	5.92784	MBOAT1
384	16670377	1.15448	11.1174	12.4624	1.54979e-06	0.00021542	5.9277	H4C14,H4C15
385	16692626	1.15448	11.1174	12.4624	1.54979e-06	0.00021542	5.9277	H4C14,H4C15
386	17122642	1.15688	5.96713	12.4613	1.55086e-06	0.00021542	5.92699	MIR4435-2HG
387	16689020	1.30663	5.84316	12.4553	1.55662e-06	0.000215662	5.92318	MCOLN3
388	16998661	3.09493	4.41006	12.4484	1.56323e-06	0.00021602	5.91883	RNU6-334P
389	16675763	-1.60216	7.1877	-12.4251	1.5859e-06	0.000218589	5.90404	PKP1
390	16652891	1.27659	7.81192	12.3558	1.65545e-06	0.000227591	5.85993	NA
391	17121284	1.05765	8.44635	12.3469	1.66454e-06	0.000228137	5.85431	GOLGA8A,GOLGA8B
392	16805422	-0.994784	9.15966	-12.3437	1.66794e-06	0.000228137	5.85221	NR2F2
393	17124274	-1.2212	10.5491	-12.3276	1.68462e-06	0.000229833	5.84197	,SMS
394	16883498	-1.3809	6.86186	-12.3203	1.69237e-06	0.000230304	5.83726	NPAS2
395	16929442	1.51174	8.94756	12.3051	1.70848e-06	0.000230898	5.82751	TIMP3
396	16992347	1.29314	6.93435	12.3049	1.70868e-06	0.000230898	5.82739	FGF18
397	16981730	-1.41643	6.25492	-12.304	1.70965e-06	0.000230898	5.82681	VEGFC
398	16752561	0.922649	8.27826	12.2798	1.73557e-06	0.000233804	5.81133	MYL6
399	16692577	-1.10686	7.66077	-12.2748	1.74109e-06	0.000233804	5.80806	H2BP2
400	16875297	1.03242	8.33374	12.2686	1.74781e-06	0.000233804	5.80409	TMC4,
401	16764758	1.12333	9.79846	12.2679	1.74862e-06	0.000233804	5.80362	GALNT6
402	16972167	1.23291	7.82605	12.259	1.75829e-06	0.000234513	5.79794	CPE
403	16665182	1.42349	5.20497	12.2495	1.76879e-06	0.000235328	5.79181	PRKAA2
404	16687123	-1.56859	6.11222	-12.232	1.7883e-06	0.000237335	5.78052	RAB3B
405	17122486	1.43111	6.96903	12.2226	1.79888e-06	0.000237445	5.77445	CYTOR,MIR4435-2HG
406	16669067	-0.993682	9.34051	-12.219	1.80292e-06	0.000237445	5.77214	VANGL1
407	16690511	-1.10305	8.36344	-12.2189	1.80307e-06	0.000237445	5.77206	TAF13
408	17022916	1.17543	8.52607	12.2155	1.80685e-06	0.000237445	5.7699	FRK
409	16761726	1.01196	7.20276	12.1986	1.82614e-06	0.000239123	5.75896	PLBD1
410	16949537	-1.16879	5.74227	-12.1965	1.82853e-06	0.000239123	5.75761	TP63
411	16819926	1.76483	5.57037	12.1903	1.83568e-06	0.000239473	5.7536	CES4A
412	16992557	0.965463	5.877	12.1824	1.84483e-06	0.000240083	5.74847	CPEB4
413	16829085	1.13433	12.611	12.1785	1.84934e-06	0.000240087	5.74596	SLC7A5
414	16998551	1.52028	8.60181	12.1575	1.87403e-06	0.000241783	5.7323	SLCO4C1
415	17108428	0.974709	8.35167	12.1564	1.87525e-06	0.000241783	5.73163	PLXNA3
416	16771571	-1.11756	9.95957	-12.1559	1.87593e-06	0.000241783	5.73125	NA
417	16836732	1.15892	8.48795	12.1487	1.8844e-06	0.000242292	5.72661	NA
418	16994002	-0.984008	10.8385	-12.143	1.89118e-06	0.000242582	5.72291	LPCAT1
419	16669180	-1.12197	9.80186	-12.1146	1.92541e-06	0.000246383	5.70442	PTGFRN
420	16965377	1.37471	5.97359	12.0556	1.99875e-06	0.00025516	5.66587	SLIT2
421	16845222	1.18997	8.8441	12.0398	2.01885e-06	0.000256784	5.65555	EZH1
422	17028030	0.947614	9.3531	12.0381	2.02105e-06	0.000256784	5.65442	,SNHG32,SNORD52
423	16973296	-1.46712	7.75856	-12.0294	2.03235e-06	0.000257011	5.64867	ZNF732
424	16837308	1.25633	8.89457	12.0293	2.03243e-06	0.000257011	5.64863	ARSG
425	16653267	1.36998	6.42172	12.0211	2.04311e-06	0.000257754	5.64322	NA
426	17062280	1.22698	6.68655	12.0155	2.05039e-06	0.000258065	5.63955	AASS
427	17125352	1.64538	6.30799	12.0029	2.06691e-06	0.000259452	5.63127	,RPL7AP28,RPL7AP49
428	16745139	1.08009	7.63207	11.9969	2.07486e-06	0.000259452	5.6273	CCDC84-DT
429	16748683	-1.01941	5.6951	-11.9953	2.07687e-06	0.000259452	5.6263	NA
430	17100201	-1.54628	9.24185	-11.9924	2.08076e-06	0.000259452	5.62437	CLIC3
431	17107420	-2.05506	6.00535	-11.9804	2.09675e-06	0.000260235	5.61647	SPANXC,SPANXA1,SPANXA2,SPANXD
432	17114718	-2.05506	6.00535	-11.9804	2.09675e-06	0.000260235	5.61647	SPANXC,SPANXA1,SPANXA2,SPANXD
433	16722162	-1.14	9.10473	-11.9746	2.1045e-06	0.000260594	5.61266	PARVA
434	16752008	1.68524	9.08202	11.9641	2.11872e-06	0.00026175	5.60571	NA
435	17121122	-0.980145	9.05558	-11.9416	2.14946e-06	0.000264937	5.59083	DUXAP9,,DUXAP8
436	16704199	-1.28931	6.55533	-11.9271	2.16951e-06	0.000266016	5.58124	FXYD4
437	16909165	0.965098	9.26292	11.9254	2.17187e-06	0.000266016	5.58012	IRS1
438	16717986	-1.00118	10.291	-11.9245	2.1731e-06	0.000266016	5.57953	NT5C2
439	16655037	1.41366	9.21174	11.9088	2.19516e-06	0.000268105	5.5691	NA
440	17028021	0.921082	9.80703	11.9031	2.20313e-06	0.000268466	5.56535	,SNHG32,SNORD52
441	17089147	-0.903663	7.53145	-11.8386	2.29652e-06	0.000279212	5.52244	MVB12B
442	16844509	-1.28454	5.92553	-11.8289	2.31095e-06	0.000280331	5.51596	KRT23
443	17118754	1.00288	6.5354	11.8146	2.33238e-06	0.000282292	5.50641	CAMK1D
444	16848318	1.43778	8.77892	11.7818	2.38249e-06	0.000287707	5.48442	ABCA5
445	16911493	-1.41622	5.79291	-11.7638	2.41042e-06	0.000290426	5.47236	SPTLC3
446	17082132	1.00396	7.22739	11.7339	2.45785e-06	0.000295477	5.45219	NAPRT
447	16965915	-1.17745	6.82262	-11.7287	2.46617e-06	0.000295813	5.44869	C4orf19
448	16688937	0.922312	8.37185	11.7134	2.49074e-06	0.000298094	5.43842	CTBS
449	16968122	1.11809	7.34395	11.6977	2.51651e-06	0.000300507	5.42777	FRAS1
450	16687737	1.37361	6.92393	11.6927	2.5246e-06	0.000300804	5.42444	PLPP3
451	16901109	0.933898	9.63514	11.6864	2.53511e-06	0.000301386	5.42014	LONRF2
452	17123264	0.959638	6.76127	11.6743	2.55525e-06	0.000303108	5.41194	TRANK1
453	16825997	1.59755	7.92543	11.6679	2.5659e-06	0.000303278	5.40763	PYCARD
454	16840945	1.3008	6.23776	11.6667	2.56799e-06	0.000303278	5.40679	SLC25A35
455	16751993	1.23406	9.79082	11.6586	2.58159e-06	0.000304214	5.40132	NA
456	17122504	1.72473	8.66955	11.6385	2.61568e-06	0.000307555	5.38772	CYTOR,,MIR4435-2HG
457	16994672	1.80016	5.60935	11.6267	2.63616e-06	0.000309285	5.37964	BASP1-AS1
458	17018335	-1.32841	6.81449	-11.6071	2.67022e-06	0.000312596	5.36633	LINC01016
459	16998642	2.30595	6.27711	11.6017	2.67976e-06	0.00031303	5.36263
460	17118694	1.28689	11.1055	11.5956	2.69041e-06	0.000313161	5.35852	SNHG12,SNORA16A
461	16665621	1.43482	6.36841	11.5918	2.69725e-06	0.000313161	5.35589	CACHD1
462	16768006	1.58846	4.1872	11.5911	2.69841e-06	0.000313161	5.35544	MIR618
463	16741142	1.2322	8.90808	11.5762	2.72513e-06	0.000315579	5.34523	ALDH3B2
464	16703770	1.00084	5.58167	11.5707	2.735e-06	0.000316039	5.34148	CCDC7
465	17087107	1.34312	7.44967	11.5477	2.77671e-06	0.000320012	5.32578	MIR23B,MIR27B
466	17028041	0.8742	11.3298	11.5452	2.78131e-06	0.000320012	5.32406	,SNHG32
467	17093204	0.918507	7.5662	11.5158	2.83586e-06	0.000324385	5.30391	BAG1
468	16859763	1.45775	10.0005	11.5151	2.83727e-06	0.000324385	5.30339	,IFI30
469	16656993	1.7905	5.58104	11.515	2.83747e-06	0.000324385	5.30332	NA
470	17125374	0.955408	8.16576	11.4994	2.86683e-06	0.000327044	5.29264	GLIDR,
471	17087057	1.55508	7.16512	11.4712	2.92094e-06	0.000332509	5.27323	NA
472	17057579	1.17999	7.54463	11.4624	2.93816e-06	0.000333761	5.26712	HUS1
473	16990264	-0.952407	7.17809	-11.4577	2.94727e-06	0.000334088	5.26391	PCDHB4
474	16654655	0.961883	12.2176	11.4475	2.96738e-06	0.000335658	5.25685	NA
475	16826606	1.12142	8.62536	11.44	2.98228e-06	0.000336634	5.25164	CRNDE
476	16905238	2.52125	5.71898	11.4324	2.99724e-06	0.000337611	5.24645	NA
477	16860418	-1.0421	8.12392	-11.4218	3.01855e-06	0.000339299	5.23909	CCNE1
478	16819049	1.08105	5.99196	11.4066	3.04928e-06	0.000342036	5.22857	IRX5,
479	16847824	0.916875	12.8277	11.3766	3.11097e-06	0.000347804	5.20775	NA
480	16677473	0.868767	10.6345	11.3753	3.11368e-06	0.000347804	5.20685	KCTD3
481	16872982	-0.953974	9.40026	-11.3675	3.12998e-06	0.000348899	5.20142	LYPD3
482	16854727	0.874242	13.2504	11.363	3.13957e-06	0.000349242	5.19824	SLC39A6
483	17061127	0.964716	8.45663	11.342	3.18397e-06	0.000353447	5.18365	POLR2J4,,RASA4B,RASA4
484	16686376	1.04383	7.79528	11.3356	3.19766e-06	0.000354234	5.17918	ZSWIM5
485	16897872	-2.79439	6.42424	-11.329	3.21191e-06	0.000355079	5.17456
486	16854594	-1.29168	7.91455	-11.3253	3.21998e-06	0.000355238	5.17195	GAREM1
487	17087900	0.958337	6.9877	11.3192	3.23317e-06	0.000355299	5.1677	ZNF462
488	16958201	1.21933	7.18119	11.3186	3.23442e-06	0.000355299	5.1673	ADCY5
489	17058176	1.01638	10.1125	11.3158	3.24041e-06	0.000355299	5.16537	GUSB
490	16766281	0.937625	11.3092	11.2988	3.2777e-06	0.000358654	5.15347	SNORD59A
491	17106415	0.972458	8.82627	11.291	3.29497e-06	0.000359809	5.14801	WDR44
492	16795368	1.15671	6.45251	11.2864	3.3052e-06	0.000360193	5.14478	STON2
493	16712482	0.898668	8.3325	11.275	3.33064e-06	0.000361569	5.13681	PIP4K2A
494	16859368	0.948095	7.64313	11.2747	3.33132e-06	0.000361569	5.1366	SIN3B
495	17098027	0.90606	10.1643	11.2508	3.38561e-06	0.00036672	5.11977	STOM
496	16692197	1.1345	7.73134	11.2206	3.45549e-06	0.000372782	5.09851	PDZK1,PDZK1P1
497	16692371	1.1345	7.73134	11.2206	3.45549e-06	0.000372782	5.09851	PDZK1,PDZK1P1
498	17118690	1.19646	9.19148	11.2108	3.47859e-06	0.000374521	5.09158	SNHG12,SNORA61,SNORA44
499	16669944	1.58009	7.07425	11.1961	3.51322e-06	0.000377116	5.08126	PDZK1
500	17123112	-0.99486	8.49641	-11.1947	3.51675e-06	0.000377116	5.08022	DUXAP8
501	16959320	2.00453	4.61432	11.1895	3.52921e-06	0.000377695	5.07654	BFSP2-AS1
502	16793750	1.12928	9.1405	11.1859	3.53763e-06	0.000377842	5.07405	SGPP1
503	16669389	-1.15241	8.10782	-11.1729	3.56905e-06	0.00038044	5.06485	PHGDH
504	16908197	-0.938458	10.6446	-11.1692	3.57812e-06	0.000380651	5.0622	IGFBP5
505	16911338	-0.963649	8.40129	-11.1595	3.60178e-06	0.000382028	5.05534	PLCB4
506	16752244	-1.04065	7.67103	-11.1581	3.60531e-06	0.000382028	5.05431	DGKA
507	16829242	0.894452	9.66435	11.1403	3.64923e-06	0.000385919	5.0417	GALNS
508	16654641	1.21092	11.3566	11.1349	3.66277e-06	0.000386589	5.03784	NA
509	16768948	0.938157	5.7344	11.1289	3.6777e-06	0.000386885	5.0336	ANKS1B
510	17123694	1.06552	5.65815	11.1228	3.6929e-06	0.000386885	5.02931	NA
511	16814389	0.917808	6.79653	11.1223	3.6944e-06	0.000386885	5.02888	WDR90
512	16984244	-1.0863	8.7365	-11.1211	3.69721e-06	0.000386885	5.02809	OSMR
513	17070705	1.09229	7.05101	11.1194	3.70166e-06	0.000386885	5.02684
514	16835483	0.985477	8.09476	11.1137	3.71605e-06	0.000387634	5.02279	ATP5MC1
515	17103951	0.95489	8.06697	11.1051	3.73797e-06	0.000389163	5.01667	TSPYL2
516	16764724	-1.46779	9.72367	-11.102	3.74593e-06	0.000389236	5.01445	SMAGP
517	16777756	1.13084	7.49256	11.0842	3.79167e-06	0.000393226	5.0018	SLC46A3
518	16851933	-0.963383	9.73582	-11.0784	3.80698e-06	0.000394052	4.9976	GALNT1
519	16654669	1.09642	9.95334	11.063	3.84725e-06	0.000397452	4.98663	NA
520	17086048	-1.4858	7.50191	-11.0559	3.86596e-06	0.000398537	4.98157	GCNT1
521	16788339	1.18637	8.14747	11.0528	3.87415e-06	0.000398537	4.97936	NA
522	16874191	-1.53102	7.46987	-11.0506	3.88005e-06	0.000398537	4.97778	NA
523	16760028	-1.69765	8.58115	-11.0462	3.89189e-06	0.00039899	4.9746
524	16835816	1.39713	6.7772	11.0391	3.9108e-06	0.000400163	4.96954	ACSF2
525	16793129	-1.42698	8.7502	-11.0279	3.941e-06	0.000402485	4.96152	BMP4
526	16920520	1.39203	5.2298	11.014	3.97892e-06	0.000405585	4.95153	LINC01441
527	16894402	0.917843	9.69585	11.0104	3.98879e-06	0.000405819	4.94895	ODC1
528	16730429	-0.960646	6.91121	-11.0066	3.99941e-06	0.00040613	4.94617	ARHGAP42
529	16834071	-0.942934	8.04888	-10.9979	4.02331e-06	0.000407785	4.93996	RARA
530	17121126	-0.981713	8.3514	-10.9879	4.05121e-06	0.000409838	4.93275	DUXAP9,,DUXAP8
531	16832319	0.992707	10.234	10.9726	4.09414e-06	0.0004134	4.92175	WSB1
532	16735826	1.69444	7.46386	10.9488	4.16226e-06	0.000419489	4.90453	NA
533	16903991	1.36288	4.98162	10.9439	4.17637e-06	0.000420121	4.90099	CCDC148
534	16928680	-1.04338	9.78966	-10.9377	4.19439e-06	0.000421144	4.8965	CCDC117
535	16854316	-0.807242	8.91963	-10.9338	4.20575e-06	0.000421495	4.89367	OSBPL1A
536	17090957	1.58894	6.68978	10.9265	4.22696e-06	0.00042283	4.88842	COL5A1
537	17108605	-0.871357	9.93101	-10.9037	4.29433e-06	0.000428769	4.87191	VAMP7
538	16762597	0.984301	9.50747	10.8967	4.31549e-06	0.000429208	4.86678	TM7SF3
539	17122540	-0.835127	7.59761	-10.8963	4.31665e-06	0.000429208	4.8665	NA
540	17044382	-0.981731	7.42539	-10.8942	4.32274e-06	0.000429208	4.86502	MPP6
541	16817017	-0.8978	11.4084	-10.8789	4.36919e-06	0.000433019	4.85386	DCTN5,PLK1
542	16778745	0.965152	9.22522	10.8706	4.3944e-06	0.000434714	4.84785	SLC25A30
543	17123894	1.08505	7.26366	10.8617	4.42192e-06	0.00043663	4.84133
544	17101517	-0.94221	10.024	-10.8487	4.46199e-06	0.000439777	4.8319	PRPS2
545	16795508	1.15414	8.59271	10.8424	4.48166e-06	0.000440905	4.82731	GALC
546	16917849	1.54312	7.23144	10.8307	4.51858e-06	0.000443723	4.81873	THBD
547	16651221	1.1899	7.75247	10.8163	4.56432e-06	0.000447395	4.80821	NA
548	16810970	1.42013	9.69519	10.8051	4.60022e-06	0.000449271	4.80002	RPL4,SNORD18C,,SNORD18B
549	16810971	1.42013	9.69519	10.8051	4.60022e-06	0.000449271	4.80002	NA
550	16836985	0.855362	9.1318	10.7938	4.63658e-06	0.000451999	4.79179	MAP3K3
551	16690019	2.59966	5.46311	10.7849	4.66583e-06	0.000453332	4.78521	PLPPR5
552	16786625	0.914639	6.99808	10.7845	4.66716e-06	0.000453332	4.78491	FLVCR2
553	17056137	1.04278	6.38934	10.7788	4.68586e-06	0.000454071	4.78073	HOXA5
554	16971443	0.841328	7.5189	10.777	4.69171e-06	0.000454071	4.77943	FAM160A1
555	16803217	1.23283	6.37015	10.7721	4.70783e-06	0.000454253	4.77584
556	16687487	1.09382	9.43792	10.7706	4.71265e-06	0.000454253	4.77477	TMEM59
557	16941024	1.07071	8.10668	10.7687	4.71901e-06	0.000454253	4.77336	SEMA3B
558	16654663	1.47565	9.8926	10.7579	4.75512e-06	0.000456909	4.76539	NA
559	16998682	-0.901532	7.4174	-10.7548	4.76549e-06	0.000457086	4.76311	EFNA5
560	16680284	1.1828	8.54452	10.7482	4.78766e-06	0.000457741	4.75826	CCNL2
561	16847164	1.38638	6.68625	10.7468	4.79236e-06	0.000457741	4.75723	TEX14
562	17043095	1.10638	6.93067	10.7451	4.79816e-06	0.000457741	4.75597	SDK1
563	17118704	2.96322	5.73198	10.7426	4.80646e-06	0.000457741	4.75416	MIR3671,MIR101-1
564	16943452	1.50833	7.44573	10.7366	4.82675e-06	0.000458857	4.74975	NXPE3
565	17125684	0.910802	7.53849	10.7247	4.86753e-06	0.000460331	4.74095	,LINC00893,LINC00894
566	17122648	1.11483	7.76832	10.7246	4.86778e-06	0.000460331	4.7409	CYTOR,,MIR4435-2HG
567	16708192	-1.03678	6.68718	-10.7231	4.87288e-06	0.000460331	4.7398	ABCC2
568	17078388	-2.52664	5.65398	-10.722	4.87659e-06	0.000460331	4.73901	CASC9
569	16877225	1.06933	7.18809	10.7156	4.89876e-06	0.000461611	4.73426	LPIN1
570	16778887	-1.2392	5.16902	-10.7119	4.91162e-06	0.000462011	4.73152	RUBCNL
571	16860856	-0.885621	7.99171	-10.7094	4.92026e-06	0.000462013	4.72968	SCN1B
572	17024746	-0.887188	9.82855	-10.7061	4.9318e-06	0.000462287	4.72723	ZBTB2
573	16653925	1.23975	6.96228	10.6987	4.95772e-06	0.000463097	4.72174	NA
574	16654037	1.23975	6.96228	10.6987	4.95772e-06	0.000463097	4.72174	NA
575	16968447	0.974627	6.65333	10.6946	4.97199e-06	0.000463623	4.71873	GPAT3
576	16894283	-0.920611	7.30541	-10.6837	5.01061e-06	0.000466104	4.71064	MBOAT2
577	16656629	1.13522	8.80949	10.6821	5.01599e-06	0.000466104	4.70951	NA
578	17124006	-0.908568	6.33546	-10.6699	5.05951e-06	0.000469335	4.70047	OSMR-AS1
579	16874273	-1.2866	9.01553	-10.6646	5.07882e-06	0.000470313	4.69648	TEAD2
580	17064848	1.68527	5.78271	10.6454	5.14816e-06	0.000475912	4.68229	RNF32-AS1
581	16788014	1.75888	6.81875	10.6377	5.17662e-06	0.000477719	4.67652	C14orf132
582	16761464	0.961905	5.81069	10.6275	5.21428e-06	0.00048026	4.66893	NA
583	17121994	-1.22326	5.85367	-10.625	5.2234e-06	0.00048026	4.6671
584	16847933	-1.21926	6.64474	-10.623	5.23102e-06	0.00048026	4.66557	AXIN2,
585	16744174	-1.02096	8.21339	-10.6198	5.24288e-06	0.000480526	4.6632	RDX
586	16920671	-1.01291	7.92044	-10.5838	5.37905e-06	0.000492165	4.63634	PMEPA1
587	16777896	-0.846317	11.0825	-10.5791	5.39698e-06	0.000492964	4.63285	HSPH1
588	16758874	-1.11133	9.17926	-10.5748	5.41349e-06	0.000493631	4.62965	NA
589	17057422	1.12292	9.7096	10.5528	5.49922e-06	0.00049909	4.61319	SNHG15,SNORA9
590	17125104	1.35864	4.95444	10.5524	5.50069e-06	0.00049909	4.61291
591	16676673	1.0547	6.2336	10.5523	5.50129e-06	0.00049909	4.6128	IL20
592	16687875	0.829008	8.77316	10.5286	5.59538e-06	0.00050677	4.59502	JUN
593	16846745	0.982682	9.36607	10.5237	5.61502e-06	0.000507691	4.59135	SPAG9
594	17083197	1.19418	7.23866	10.5206	5.62738e-06	0.000507952	4.58905	VLDLR
595	16674604	0.975021	7.45031	10.5006	5.70894e-06	0.000514448	4.57396	MR1
596	16654661	1.67903	9.39449	10.4923	5.74292e-06	0.000516533	4.56774	NA
597	16810177	1.04908	8.19684	10.4903	5.75135e-06	0.000516533	4.5662	VPS13C
598	16907257	1.10626	8.93258	10.4876	5.76242e-06	0.000516662	4.56419	TRAK2
599	16798744	1.29265	6.97658	10.4788	5.79896e-06	0.00051907	4.55756	GOLGA8R,GOLGA8Q,GOLGA8O,GOLGA8N
600	16653767	1.32384	7.52576	10.461	5.87398e-06	0.000524908	4.54408	NA
601	16981004	-0.919571	8.31066	-10.435	5.9852e-06	0.000533958	4.5244	PPID
602	17006895	0.838625	9.36319	10.4215	6.04372e-06	0.000536005	4.51419	,SNHG32
603	17026337	0.838625	9.36319	10.4215	6.04372e-06	0.000536005	4.51419	,SNHG32
604	17038315	0.838625	9.36319	10.4215	6.04372e-06	0.000536005	4.51419	,SNHG32
605	16766627	0.951346	8.30598	10.4205	6.04813e-06	0.000536005	4.51343	B4GALNT1
606	16751997	1.10043	10.1209	10.4157	6.06935e-06	0.00053641	4.50975	NA
607	17064459	-0.901328	9.40895	-10.4149	6.07271e-06	0.00053641	4.50917	ABCF2-H2BE1,ABCF2
608	17121134	-0.86399	8.68061	-10.4084	6.10116e-06	0.000538036	4.50427	DUXAP8
609	16850797	-0.863407	9.49789	-10.4025	6.12731e-06	0.000539455	4.49978	RAB12
610	17082362	-0.831999	9.08989	-10.3991	6.14252e-06	0.000539908	4.49718	EPPK1
611	16772074	-0.820754	8.7679	-10.3905	6.18109e-06	0.000542408	4.49061	NCOR2
612	16969414	-0.974127	9.88327	-10.3867	6.19795e-06	0.000542512	4.48775	TET2
613	16795582	0.931407	7.40529	10.3857	6.20251e-06	0.000542512	4.48698	PTPN21
614	17066018	-0.899621	6.68912	-10.3824	6.21749e-06	0.000542937	4.48445	ZDHHC2
615	16802650	-1.36292	6.72656	-10.3759	6.24673e-06	0.000544603	4.47952	NA
616	17002962	1.47038	5.71471	10.368	6.28271e-06	0.000546851	4.47349	DRD1
617	17113980	1.41057	5.17682	10.3464	6.38201e-06	0.00055432	4.45703	SMARCA1
618	16688339	1.49733	6.08149	10.3449	6.3892e-06	0.00055432	4.45585	WLS
619	16925809	0.898273	9.23017	10.3426	6.39973e-06	0.000554336	4.45412	DSCAM
620	16834302	0.976199	9.39445	10.3401	6.41133e-06	0.000554445	4.45222	ATP6V0A1
621	16765404	0.865843	7.74745	10.3338	6.4407e-06	0.000555902	4.44742	CALCOCO1
622	16661192	1.47572	7.81566	10.3321	6.4489e-06	0.000555902	4.44608	DHDDS,HMGN2
623	16754397	1.16521	5.18534	10.326	6.47773e-06	0.000556866	4.4414
624	16860888	-1.10612	9.42694	-10.3253	6.48086e-06	0.000556866	4.44089	,FXYD3
625	17045674	0.916534	9.87893	10.3217	6.49808e-06	0.000557381	4.4381	OGDH
626	16994521	-1.02346	7.13775	-10.3196	6.50765e-06	0.000557381	4.43656	ANKH
627	17105114	-0.779967	7.98625	-10.3137	6.53579e-06	0.000558028	4.43203	SH3BGRL
628	16714581	1.12467	6.44469	10.3137	6.53602e-06	0.000558028	4.43199	SLC16A9
629	16733421	1.39022	6.78054	10.3021	6.59142e-06	0.000561863	4.42313	TMEM45B
630	17092268	-1.04921	6.36241	-10.2974	6.61416e-06	0.000562907	4.41951	GLDC
631	17059756	0.855092	7.75647	10.2902	6.64908e-06	0.000564983	4.41398	CDK6
632	16780456	-0.828095	7.51641	-10.2852	6.67351e-06	0.00056616	4.41012	STK24
633	17062533	-1.82668	5.29824	-10.2821	6.68843e-06	0.000566528	4.40778	LINC02830
634	16816424	1.66247	6.70159	10.28	6.69898e-06	0.000566528	4.40612	SYT17
635	16998648	2.31684	4.59127	10.2662	6.76689e-06	0.000571371	4.39552
636	16732067	1.26307	7.46422	10.2459	6.86849e-06	0.000579038	4.37986	CCDC84
637	16701106	-0.94739	9.2484	-10.242	6.88819e-06	0.000579787	4.37685	CHML
638	17046284	0.794295	10.0758	10.2379	6.90865e-06	0.000580597	4.37374	SUMF2
639	16869960	2.24033	6.46032	10.2352	6.92253e-06	0.000580853	4.37163	CYP4F11
640	17077826	0.926289	8.78766	10.2321	6.93829e-06	0.000581266	4.36924	MYBL1
641	16933006	-0.819479	7.24035	-10.2196	7.00224e-06	0.000585464	4.3596	LINC02557
642	16804446	1.37345	5.15147	10.2181	7.01024e-06	0.000585464	4.3584
643	16659102	0.820659	8.24914	10.2065	7.07e-06	0.000589537	4.34947	CLCN6
644	16834789	-1.45981	4.66535	-10.191	7.15144e-06	0.000595402	4.33743	MEIOC
645	16740914	0.867101	7.82097	10.1843	7.18672e-06	0.000597083	4.33226	PC
646	16816200	-0.851187	9.77286	-10.183	7.1939e-06	0.000597083	4.33121	NDE1
647	16705439	0.846149	6.15425	10.1592	7.32117e-06	0.000606024	4.31276	STOX1
648	16654657	0.972758	12.4701	10.1567	7.33459e-06	0.000606024	4.31084	NA
649	16865308	1.07476	8.34067	10.1566	7.33554e-06	0.000606024	4.3107	LENG8
650	16856946	-0.855757	10.3757	-10.1536	7.35183e-06	0.000606436	4.30837	NFIC
651	16692632	0.954393	9.5548	10.1505	7.36855e-06	0.000606881	4.30598	H2BC21
652	16698980	0.812213	9.0829	10.1465	7.39052e-06	0.000607757	4.30285	SLC30A1
653	17122454	1.21625	10.7002	10.1348	7.45464e-06	0.000611771	4.29376	ANKRD36C,ANKRD36,ANKRD36B
654	17016390	0.805646	8.61151	10.1334	7.46216e-06	0.000611771	4.2927	H2BC8
655	16947626	-0.852317	11.5839	-10.1167	7.55546e-06	0.000618475	4.27963	NMD3
656	16667662	-0.860803	7.13121	-10.1124	7.57923e-06	0.000619434	4.27632	CDC14A
657	17055480	0.929667	7.07684	10.1105	7.59028e-06	0.000619434	4.27479	ANKMY2
658	16980364	-1.28232	5.72424	-10.0966	7.66866e-06	0.000624879	4.26398	ZNF827
659	17125702	1.34883	8.70675	10.0935	7.68664e-06	0.000625394	4.26151	SLC6A14,SLC6A14P1
660	17037670	1.00046	6.4719	10.0873	7.7221e-06	0.000626228	4.25667	HLA-A
661	16973578	-0.97668	8.94767	-10.0852	7.7344e-06	0.000626228	4.255	SLBP
662	16654679	1.29731	9.4037	10.0845	7.73847e-06	0.000626228	4.25444	NA
663	16947613	-0.978626	7.10192	-10.0836	7.74361e-06	0.000626228	4.25374	PPM1L
664	16983611	1.22053	4.61273	10.0696	7.82467e-06	0.000630946	4.24278	PURPL
665	16684178	1.06021	8.14515	10.0694	7.82549e-06	0.000630946	4.24267	SNHG12
666	17112835	1.38642	5.51465	10.0646	7.85368e-06	0.000631896	4.23889	ZMAT1
667	17032882	0.789918	7.47407	10.0634	7.86084e-06	0.000631896	4.23793	HLA-A
668	16914741	1.16663	9.24107	10.061	7.87463e-06	0.000632057	4.23608	ZFAS1,,SNORD12C
669	17120094	1.57261	5.0074	10.0571	7.89759e-06	0.000632952	4.23302	NA
670	16883776	-0.856665	8.68307	-10.0486	7.94823e-06	0.000634873	4.22629	SLC9A2
671	17103804	-0.949291	9.73352	-10.0471	7.95668e-06	0.000634873	4.22517	MAGED1
672	16888317	-0.843822	9.10151	-10.0471	7.95707e-06	0.000634873	4.22512	ITPRID2
673	16779119	-0.861171	9.71645	-10.0449	7.97022e-06	0.000634977	4.22338	KPNA3
674	16889664	0.887965	7.39275	10.0322	8.04577e-06	0.000640045	4.21345	CARF
675	17096285	-0.784888	7.55214	-10.0265	8.08048e-06	0.000641854	4.20891	CTSV
676	16963113	1.42913	6.91667	10.0198	8.12116e-06	0.000644131	4.20363	APOD
677	16998810	1.05466	7.05191	10.0139	8.157e-06	0.000645162	4.19899	STARD4
678	16792456	-1.68517	4.62346	-10.0137	8.15823e-06	0.000645162	4.19883	LINC00648
679	17112123	-1.2833	5.40242	-10.0106	8.17712e-06	0.000645703	4.1964	PABPC1L2B-AS1,
680	16901161	0.996459	6.39824	10.0036	8.22022e-06	0.000648152	4.19086	TBC1D8
681	16715793	1.42881	6.05619	10.001	8.23617e-06	0.000648373	4.18882	KCNMA1
682	16744822	1.15128	8.43997	9.9992	8.2472e-06	0.000648373	4.18741	BACE1
683	17123124	0.975209	7.51564	9.99493	8.27363e-06	0.000649498	4.18404	PI4KAP1,PI4KA
684	17078999	-1.08564	5.94197	-9.99293	8.28607e-06	0.000649523	4.18246	C8orf88
685	17020497	1.66741	5.56534	9.9818	8.35556e-06	0.000653078	4.17366	NA
686	16914478	-0.926582	7.27888	-9.98176	8.35578e-06	0.000653078	4.17363	EYA2
687	16764305	1.15958	6.5403	9.97498	8.39845e-06	0.000655392	4.16827	NA
688	16814915	-1.11922	9.94858	-9.97317	8.40983e-06	0.000655392	4.16684	SLC9A3R2
689	16704977	2.09792	5.43307	9.9708	8.42484e-06	0.000655609	4.16496	PRKG1
690	16980974	-1.30057	6.98149	-9.95833	8.50417e-06	0.000660823	4.15509	GASK1B
691	17081447	-0.958302	7.36633	-9.95131	8.54926e-06	0.000663365	4.14951	ST3GAL1
692	17015084	0.866373	8.0386	9.94082	8.61702e-06	0.000667657	4.1412	SERPINB1
693	16847839	1.16835	11.6697	9.9336	8.66401e-06	0.000668438	4.13546	DDX5,MIR5047
694	16847840	1.16835	11.6697	9.9336	8.66401e-06	0.000668438	4.13546	NA
695	16676263	0.852812	10.3806	9.93353	8.66449e-06	0.000668438	4.13541	ZC3H11A,ZBED6
696	16793877	-1.34261	5.88899	-9.93094	8.68143e-06	0.000668782	4.13335	GPX2
697	16942958	1.14333	5.57674	9.92724	8.70572e-06	0.000669691	4.1304	EPHA3
698	17002304	1.0227	6.96541	9.91316	8.7987e-06	0.000675874	4.11921	RNF145
699	16853375	1.09954	6.34881	9.91027	8.81791e-06	0.00067638	4.11691	NA
700	17069550	1.35386	6.65295	9.89836	8.89765e-06	0.000681114	4.10742	,ADHFE1
701	16746808	-0.806443	10.0058	-9.89726	8.90503e-06	0.000681114	4.10654	FKBP4
702	16734491	-0.92535	8.73061	-9.89177	8.94209e-06	0.000682975	4.10216	PHLDA2
703	17117871	-1.36495	9.41932	-9.88938	8.95827e-06	0.000683237	4.10026	HMGA1P8,HMGA1
704	16766185	0.810679	6.10161	9.88442	8.99198e-06	0.000684834	4.0963	GLS2
705	16834105	1.34544	5.46549	9.88082	9.0165e-06	0.000685669	4.09343	NA
706	16674185	-1.07133	6.27429	-9.87906	9.02853e-06	0.000685669	4.09202	BRINP2
707	17066083	1.34337	8.46102	9.86612	9.11754e-06	0.00069145	4.08168	PDGFRL
708	17039281	0.844018	9.7529	9.86284	9.14022e-06	0.000692191	4.07906	HLA-C
709	16888349	-1.20729	4.69456	-9.85903	9.16664e-06	0.000693213	4.07601	PPP1R1C
710	17122782	1.25426	6.98649	9.85147	9.2194e-06	0.000695654	4.06996
711	16834196	-1.15497	7.30211	-9.85069	9.22487e-06	0.000695654	4.06934	FKBP10
712	16654651	0.787633	13.1022	9.8469	9.25146e-06	0.000696679	4.0663	NA
713	16872152	-1.13523	6.79079	-9.84382	9.27312e-06	0.00069733	4.06384	,FBXO17
714	16723832	-0.904579	9.10692	-9.84064	9.29554e-06	0.000697465	4.06129	API5
715	16889218	-0.871762	7.15849	-9.83988	9.30092e-06	0.000697465	4.06068	SPATS2L
716	16811437	0.811083	9.5195	9.82538	9.4041e-06	0.00070345	4.04904	HEXA
717	17045738	1.06921	8.39705	9.82497	9.40697e-06	0.00070345	4.04872	PPIA
718	16693474	-0.834813	8.28455	-9.81978	9.44426e-06	0.000704862	4.04455	S100A16
719	16771132	-0.858373	8.96066	-9.81707	9.46373e-06	0.000704862	4.04237	RAB35
720	16828450	-0.780151	8.44006	-9.81686	9.46529e-06	0.000704862	4.0422	CFDP1
721	16653921	1.47325	9.52531	9.81095	9.50796e-06	0.000706078	4.03745	NA
722	16654033	1.47325	9.52531	9.81095	9.50796e-06	0.000706078	4.03745	NA
723	17050522	-0.916419	7.80854	-9.80526	9.54929e-06	0.000708166	4.03288	TES
724	16886448	1.30046	6.77003	9.7983	9.6001e-06	0.000710951	4.02728	LYPD6
725	17021407	0.775527	8.43193	9.79632	9.61462e-06	0.000711044	4.02569	SNHG5
726	17119464	1.04846	8.65894	9.78135	9.72511e-06	0.000718225	4.01363	SNHG32,SNORD52
727	16988871	-0.968351	4.5372	-9.76439	9.85204e-06	0.000726418	3.99994	NA
728	16651237	1.12983	9.78088	9.76292	9.86315e-06	0.000726418	3.99876	NA
729	17056861	-1.92005	6.39899	-9.75627	9.91346e-06	0.000729122	3.99338	AMPH
730	17080022	-1.23751	7.0337	-9.75228	9.94379e-06	0.000730351	3.99016	LRP12
731	16921724	-1.09589	8.61727	-9.7441	1.00063e-05	0.000733936	3.98355	NCAM2
732	16986249	0.777817	10.5259	9.73592	1.00693e-05	0.000737547	3.97692	HMGCR
733	16760393	0.99033	6.71566	9.73213	1.00986e-05	0.000738685	3.97385	VAMP1
734	16723662	-1.18168	8.35982	-9.72935	1.01202e-05	0.000739111	3.9716	FJX1
735	17030840	0.835834	9.36222	9.72718	1.0137e-05	0.000739111	3.96985	,SNHG32
736	17041782	0.824201	9.26793	9.72447	1.01581e-05	0.000739111	3.96765	HLA-C
737	17088296	-1.05649	4.52859	-9.72429	1.01595e-05	0.000739111	3.9675
738	16829170	0.806878	10.0752	9.71598	1.02246e-05	0.000742303	3.96077	PIEZO1
739	16944055	0.882414	9.01369	9.71144	1.02603e-05	0.000742303	3.95709	SIDT1
740	16913263	-0.970927	8.33884	-9.71077	1.02656e-05	0.000742303	3.95654	EPB41L1
741	16808330	0.843178	8.59779	9.71007	1.02711e-05	0.000742303	3.95597	PPIP5K1,
742	16810341	0.779788	10.3968	9.70987	1.02727e-05	0.000742303	3.95581	CA12
743	16945854	0.771775	10.5996	9.706	1.03033e-05	0.000742854	3.95267	CDV3
744	17114567	0.891433	10.4388	9.70541	1.0308e-05	0.000742854	3.95219	RBMX,SNORD61
745	17031781	0.836649	10.0501	9.70089	1.03439e-05	0.00074444	3.94852	HLA-C
746	16920497	1.37656	5.74194	9.69824	1.0365e-05	0.000744962	3.94636	CYP24A1
747	16762489	0.902324	7.91653	9.68992	1.04316e-05	0.000747763	3.9396	ITPR2
748	16720109	1.01649	5.95574	9.68988	1.04319e-05	0.000747763	3.93957	NA
749	16766279	1.08908	8.01972	9.68448	1.04754e-05	0.00074897	3.93518	ATP5F1B
750	17098506	-0.96815	8.59073	-9.68432	1.04767e-05	0.00074897	3.93505	NIBAN2
751	17043613	-1.95731	5.71857	-9.67828	1.05256e-05	0.000750682	3.93013
752	17068385	-0.796451	6.64509	-9.67645	1.05404e-05	0.000750682	3.92864	GINS4
753	16871698	0.809503	5.75778	9.67618	1.05426e-05	0.000750682	3.92842	ZNF461
754	16911783	-0.809433	8.30025	-9.67217	1.05753e-05	0.000751844	3.92515	,DTD1
755	16986417	0.793791	6.95126	9.66953	1.05969e-05	0.000751844	3.923	F2RL1
756	17054691	0.97131	5.85088	9.66902	1.0601e-05	0.000751844	3.92259	SDK1-AS1
757	16654649	1.02208	12.101	9.6627	1.06528e-05	0.000754521	3.91744	NA
758	16752495	0.798817	10.1383	9.66041	1.06717e-05	0.000754859	3.91557	ESYT1
759	17059771	1.19296	5.24921	9.65568	1.07107e-05	0.00075489	3.91171	SAMD9
760	16924832	0.804055	2.97702	9.65549	1.07123e-05	0.00075489	3.91155	KRTAP19-3
761	17121592	1.03084	6.53763	9.65524	1.07143e-05	0.00075489	3.91135	CCDC144A,,CCDC144B,CCDC144CP
762	17113513	-1.15007	6.82066	-9.65043	1.07543e-05	0.000756708	3.90742	CT83
763	16784664	0.816968	8.96697	9.63271	1.09027e-05	0.000766144	3.89295	ARID4A
764	16997245	1.17671	6.34519	9.62554	1.09634e-05	0.000768846	3.88708	FAM169A
765	17119722	1.6091	5.98508	9.62478	1.09698e-05	0.000768846	3.88646	AOPEP,MIR23B,MIR27B,MIR24-1
766	16821541	1.22799	6.98935	9.62244	1.09898e-05	0.000768943	3.88454	CRISPLD2
767	17057378	0.793426	9.83735	9.61928	1.10167e-05	0.000768943	3.88195	PURB
768	16806968	0.955793	8.32234	9.61778	1.10295e-05	0.000768943	3.88073	GOLGA8A,GOLGA8B
769	17116684	-0.85232	9.76962	-9.61444	1.1058e-05	0.000768943	3.87799	VAMP7
770	17047985	0.890735	6.99542	9.61398	1.1062e-05	0.000768943	3.87761	ADAM22
771	16938562	0.905875	8.21379	9.61342	1.10668e-05	0.000768943	3.87715	TGFBR2
772	16863684	-0.914114	8.75937	-9.61287	1.10716e-05	0.000768943	3.8767	SELENOW
773	16806702	0.942901	6.72635	9.61011	1.10952e-05	0.000769591	3.87444	GOLGA8R,GOLGA8Q,GOLGA8O,GOLGA8N
774	17089371	0.832819	9.32214	9.59793	1.12006e-05	0.000775895	3.86446	STXBP1
775	16940260	0.868293	8.70782	9.59465	1.12292e-05	0.000776875	3.86176	NBEAL2
776	17026109	0.783026	8.11807	9.58806	1.12869e-05	0.000778851	3.85635	HLA-A
777	17027344	0.783026	8.11807	9.58806	1.12869e-05	0.000778851	3.85635	HLA-A
778	16926644	0.786238	9.2721	9.58505	1.13133e-05	0.000779672	3.85388	LSS
779	16814498	-0.867902	9.07144	-9.58084	1.13504e-05	0.00078109	3.85042	METRN
780	16724471	0.877988	8.86354	9.57941	1.1363e-05	0.00078109	3.84924	DDB2
781	17058826	-0.859807	9.41754	-9.56247	1.15138e-05	0.000790442	3.83531	HIP1
782	17122664	1.44596	8.12538	9.56033	1.1533e-05	0.000790748	3.83354	CYTOR,MIR4435-2HG
783	16886757	0.729119	9.65463	9.55623	1.15699e-05	0.000792264	3.83017	PKP4
784	17088124	-0.756427	9.15033	-9.5498	1.1628e-05	0.000794292	3.82487	HSDL2
785	16820849	1.53054	5.72322	9.54968	1.16291e-05	0.000794292	3.82477	CALB2
786	16919915	-0.775122	9.99308	-9.54271	1.16926e-05	0.000797292	3.81902	ZMYND8
787	16912116	-0.792231	5.38794	-9.54069	1.17109e-05	0.000797292	3.81736	SYNDIG1
788	16757636	-0.743646	8.33444	-9.53996	1.17177e-05	0.000797292	3.81675	RNFT2
789	16851427	-0.872437	8.73757	-9.53809	1.17348e-05	0.000797444	3.81521	CABLES1
790	16851486	0.992193	6.77036	9.53402	1.17721e-05	0.000798966	3.81185	LAMA3
791	16858435	0.868118	6.27091	9.53111	1.17989e-05	0.000799776	3.80944	CCDC159
792	16867349	-0.806728	7.13816	-9.52033	1.18987e-05	0.000805455	3.80054	SEMA6B
793	17087206	-0.887985	6.14744	-9.51882	1.19128e-05	0.000805455	3.79929
794	17063233	-0.786908	10.0204	-9.50939	1.2001e-05	0.000809874	3.79149	MTPN
795	17122206	1.09025	6.9221	9.50861	1.20083e-05	0.000809874	3.79084	ANKRD36BP2,ANKRD36,ANKRD36B
796	17067890	-0.913767	8.69555	-9.49321	1.2154e-05	0.000818425	3.77808	ZNF703
797	17064907	-1.11999	5.5304	-9.49199	1.21656e-05	0.000818425	3.77707	PTPRN2
798	16846157	0.809514	8.28969	9.48767	1.22069e-05	0.000820175	3.77349	PRR15L
799	16813922	0.833001	6.63694	9.48458	1.22366e-05	0.000821136	3.77092	NA
800	17113053	0.943673	6.50025	9.48242	1.22573e-05	0.000821501	3.76913	NA
801	16912597	-0.999861	7.67484	-9.47626	1.23167e-05	0.000822835	3.76402	DNMT3B
802	16699533	-0.934688	6.43131	-9.47576	1.23215e-05	0.000822835	3.7636	DUSP10
803	17061125	0.794752	7.32792	9.47558	1.23233e-05	0.000822835	3.76345	RASA4B,RASA4,
804	16824583	1.12394	6.27718	9.47321	1.23462e-05	0.00082334	3.76149	GPR139
805	16880414	0.835674	9.30792	9.47032	1.23742e-05	0.000824096	3.75909	REL
806	16810376	0.918648	8.78563	9.46888	1.23883e-05	0.000824096	3.75789	HERC1
807	17118250	-0.807625	10.3611	-9.46649	1.24116e-05	0.000824624	3.7559	NA
808	16655531	1.2076	5.63346	9.46338	1.24419e-05	0.000825618	3.75331	NA
809	16826243	0.796783	9.36573	9.45359	1.2538e-05	0.000830727	3.74518	ITFG1
810	16727633	0.866905	6.83236	9.45239	1.25499e-05	0.000830727	3.74417	SYT12
811	16686273	-1.03667	7.95482	-9.44817	1.25916e-05	0.000832459	3.74066	RNU5D-1
812	16688469	-1.50309	5.22867	-9.44292	1.26437e-05	0.000834875	3.73629	PTGER3
813	16681775	0.80077	5.92347	9.43823	1.26905e-05	0.000836936	3.73238	MTHFR
814	16714699	-0.906868	6.96931	-9.43027	1.27704e-05	0.000840462	3.72574	RHOBTB1
815	17057354	0.898367	8.88277	9.42977	1.27754e-05	0.000840462	3.72533	TMED4
816	16909401	1.13843	7.87012	9.41696	1.29051e-05	0.000847956	3.71464	SLC16A14
817	17087517	-1.44327	5.89089	-9.41344	1.2941e-05	0.000849006	3.71169	NR4A3
818	16847810	1.05786	8.1358	9.4123	1.29527e-05	0.000849006	3.71074	POLG2
819	16850328	-0.995012	6.60129	-9.40627	1.30145e-05	0.000849938	3.7057	MAPK8IP1P2,MAPK8IP1P1,
820	16850334	-0.995012	6.60129	-9.40627	1.30145e-05	0.000849938	3.7057	MAPK8IP1P2,MAPK8IP1P1,
821	16850360	-0.995012	6.60129	-9.40627	1.30145e-05	0.000849938	3.7057	MAPK8IP1P2,MAPK8IP1P1,
822	17045404	0.712358	10.3535	9.39672	1.31131e-05	0.000854064	3.69771	CDK13
823	17122490	1.48649	7.19889	9.3958	1.31227e-05	0.000854064	3.69694	MIR4435-2HG
824	16743091	-0.863668	8.57666	-9.39553	1.31255e-05	0.000854064	3.69671	FZD4
825	16753426	0.999168	9.1768	9.3914	1.31684e-05	0.000854774	3.69326	SRGAP1
826	16699795	0.893686	7.62437	9.39048	1.31779e-05	0.000854774	3.69249	NVL
827	16691436	-1.33437	7.15887	-9.38988	1.31842e-05	0.000854774	3.69199
828	16875200	0.706631	7.98479	9.3822	1.32646e-05	0.00085895	3.68555
829	16747270	0.885254	7.12913	9.37781	1.33108e-05	0.000860899	3.68187	TAPBPL
830	16979719	0.971476	7.00993	9.37604	1.33295e-05	0.000861068	3.68039	SCLT1
831	17045380	0.895854	9.30013	9.37198	1.33724e-05	0.000862803	3.67698	LINC00265
832	16940593	0.7489	8.21878	9.36995	1.33939e-05	0.000863153	3.67528	P4HTM
833	16677913	0.75365	8.44197	9.35583	1.35448e-05	0.000871826	3.66342	DEGS1
834	16861126	-1.40867	6.71588	-9.34518	1.36597e-05	0.00087817	3.65447	UPK1A
835	17055182	1.23498	5.12234	9.3372	1.37466e-05	0.000882111	3.64776	NA
836	16834111	1.18	6.15345	9.33653	1.37539e-05	0.000882111	3.64719	TMEM99
837	16654653	0.883525	12.4447	9.3307	1.38179e-05	0.000884462	3.64228	NA
838	17121640	0.981374	5.57418	9.33018	1.38236e-05	0.000884462	3.64184
839	16655549	1.69674	4.24943	9.32339	1.38985e-05	0.000888193	3.63612	NA
840	16773128	2.19583	6.92254	9.31678	1.39718e-05	0.00089182	3.63054	NA
841	16970465	0.729922	6.51934	9.31193	1.40259e-05	0.000894206	3.62645	FAT4
842	16676258	1.02545	10.2787	9.30882	1.40608e-05	0.000895363	3.62383	ZC3H11A,ZBED6
843	16785155	0.973685	9.39258	9.30672	1.40843e-05	0.000895561	3.62205	SYNE2
844	16893843	1.18967	6.38192	9.30556	1.40973e-05	0.000895561	3.62108
845	16846193	1.41559	4.65622	9.30378	1.41173e-05	0.000895773	3.61957	RNU6-1201P
846	16728442	0.731769	7.80443	9.29488	1.42179e-05	0.000901089	3.61205	NADSYN1
847	16971465	1.04607	6.01293	9.29278	1.42417e-05	0.000901534	3.61028	FAM160A1
848	16916261	0.815507	10.1762	9.28908	1.42839e-05	0.000902844	3.60715	PCMTD2,
849	17123550	1.19403	4.98126	9.288	1.42961e-05	0.000902844	3.60624
850	17062878	-0.783555	7.16593	-9.28616	1.43172e-05	0.00090311	3.60468	CEP41
851	16913957	-1.07797	11.0352	-9.27049	1.44976e-05	0.000913415	3.59141	MYBL2
852	16916682	-0.84549	8.20507	-9.26754	1.45319e-05	0.0009145	3.58891	SLC4A11
853	16736821	1.0249	8.11037	9.26482	1.45635e-05	0.000915416	3.58661	LGR4
854	16697018	0.986798	7.36131	9.2602	1.46174e-05	0.000916823	3.58269	RGS16
855	17123262	1.06212	5.94444	9.25998	1.46201e-05	0.000916823	3.5825	TRANK1
856	16942692	-1.16266	6.45507	-9.25597	1.4667e-05	0.000918281	3.5791	LINC02005
857	17111874	-0.832712	8.06567	-9.25508	1.46776e-05	0.000918281	3.57834	SNX12
858	17113725	0.758798	9.94373	9.25099	1.47257e-05	0.000920216	3.57487	LAMP2
859	17122484	1.15363	5.15357	9.24179	1.48346e-05	0.000924977	3.56706	MIR4435-2HG
860	16689042	0.816129	8.84847	9.24165	1.48363e-05	0.000924977	3.56693	SYDE2
861	16875166	-1.96813	5.21174	-9.23889	1.48691e-05	0.000925944	3.56459	ZNF347
862	16667258	-0.761428	9.44112	-9.22885	1.49895e-05	0.000932358	3.55605	FNBP1L
863	16863740	0.890864	8.21772	9.2251	1.50346e-05	0.000934081	3.55286	ZNF114
864	17019877	1.50472	5.51804	9.22239	1.50675e-05	0.000934525	3.55055	CRISP3
865	16982635	-0.952574	8.554	-9.22024	1.50935e-05	0.000934525	3.54872	TRIP13
866	16688164	0.723043	10.3562	9.22019	1.50941e-05	0.000934525	3.54868	JAK1
867	16706238	0.701106	10.2776	9.21407	1.51685e-05	0.000938053	3.54346	ADK
868	17064679	-0.812394	9.08502	-9.20847	1.52369e-05	0.000940584	3.5387	XRCC2
869	16970495	-0.703957	5.05142	-9.20785	1.52446e-05	0.000940584	3.53816	INTU
870	16881138	-0.778306	8.34594	-9.1999	1.53424e-05	0.000945531	3.53138	MXD1
871	16662755	0.804303	8.9913	9.1939	1.54166e-05	0.000949016	3.52626	MACF1
872	17108546	-0.847097	9.94886	-9.18543	1.55222e-05	0.000954422	3.51902	BRCC3
873	16999245	0.802853	9.32723	9.18271	1.55564e-05	0.000955424	3.5167	PPIC
874	16963845	0.960907	7.96334	9.16283	1.58079e-05	0.000969763	3.49969	IDUA
875	16829629	0.908899	8.42444	9.16012	1.58425e-05	0.000969805	3.49737	SRR
876	17122804	1.1683	4.36808	9.15994	1.58448e-05	0.000969805	3.49722	MIR646HG
877	16834603	0.875791	6.78186	9.14794	1.59993e-05	0.000978146	3.48692	TMEM106A
878	16802553	0.965111	8.39259	9.14578	1.60272e-05	0.000978734	3.48508	RPLP1
879	16823353	-0.719817	7.52011	-9.14319	1.60608e-05	0.000979672	3.48286	ZNF597
880	16694701	1.01617	9.1435	9.14159	1.60817e-05	0.00097983	3.48148	CRABP2
881	16654687	1.078	10.1351	9.13755	1.61343e-05	0.000981924	3.47801	NA
882	16970762	0.873657	8.36374	9.13456	1.61735e-05	0.000982926	3.47544	PCDH10
883	17051474	-0.846841	7.54815	-9.13282	1.61962e-05	0.000982926	3.47395	SMKR1
884	16711426	-0.978903	7.57876	-9.13209	1.62058e-05	0.000982926	3.47332	ASB13
885	16663810	0.92402	8.51543	9.13045	1.62274e-05	0.000983124	3.47191	NA
886	17015637	0.719808	10.2117	9.12219	1.63364e-05	0.000988611	3.46481	ELOVL2
887	17019805	-0.876006	8.18378	-9.11768	1.63962e-05	0.00099111	3.46093	TNFRSF21
888	16708402	0.968078	7.25683	9.11534	1.64273e-05	0.000991871	3.45892	SFXN3
889	16889411	0.953492	7.013	9.11347	1.64522e-05	0.000992261	3.45731	CFLAR
890	17010544	-0.79205	8.24778	-9.09238	1.67364e-05	0.00100827	3.43914	SH3BGRL2
891	17119930	1.53171	5.15877	9.09009	1.67677e-05	0.00100902	3.43716	LINC01661
892	17044429	1.32211	6.01578	9.0885	1.67893e-05	0.00100919	3.43579	NA
893	16909411	1.08938	7.76226	9.08547	1.68309e-05	0.00101038	3.43317	RNY4P37,ATP5F1A,SLC16A14,RNY4P19
894	16656415	0.968647	8.47238	9.0843	1.68469e-05	0.00101038	3.43216	NA
895	17121124	-1.01049	8.76144	-9.07993	1.69068e-05	0.00101141	3.42839	DUXAP9,,DUXAP8
896	16991839	0.799829	8.62152	9.07935	1.69148e-05	0.00101141	3.42789	CCNG1
897	17112426	-1.28012	5.42185	-9.07893	1.69207e-05	0.00101141	3.42752	HMGN5
898	17022362	0.731455	7.14665	9.07756	1.69395e-05	0.00101141	3.42635	SESN1
899	16869596	-0.829213	9.54638	-9.07293	1.70035e-05	0.0010141	3.42234	ADGRL1
900	17062679	-0.788823	8.7404	-9.06902	1.70577e-05	0.0010162	3.41897	IMPDH1
901	17063461	0.908835	9.54987	9.06553	1.71063e-05	0.00101797	3.41595	HIPK2
902	16706499	-0.706302	10.0997	-9.06262	1.7147e-05	0.00101897	3.41343	PPIF
903	16748788	0.779675	7.99442	9.06145	1.71632e-05	0.00101897	3.41242	NA
904	16795017	0.756847	6.7808	9.06025	1.71801e-05	0.00101897	3.41137	VASH1-AS1,ANGEL1
905	16885859	2.10924	5.09767	9.05759	1.72174e-05	0.00102005	3.40908	NCKAP5-AS2
906	16852331	-0.850197	7.87878	-9.05553	1.72464e-05	0.00102064	3.40729	ME2
907	16752016	1.30664	9.77442	9.0482	1.73498e-05	0.00102563	3.40094	NA
908	16785789	1.19066	6.19494	9.04428	1.74054e-05	0.00102778	3.39755	GALNT16
909	17105757	0.733884	7.19712	9.03926	1.7477e-05	0.00103087	3.39319	TCEAL3,TCEAL1
910	17122204	1.1904	8.72519	9.0215	1.77326e-05	0.0010448	3.37778	ANKRD36BP2,ANKRD36C,ANKRD36,ANKRD36B
911	16988874	0.894386	9.3186	9.01679	1.7801e-05	0.00104667	3.37369	ADAMTS19
912	16990312	-1.10255	7.93615	-9.0166	1.78038e-05	0.00104667	3.37353	PCDHB13
913	16686990	0.899856	8.10897	9.0153	1.78228e-05	0.00104667	3.37239	TTC39A
914	16771570	-0.968888	7.79416	-9.00534	1.79687e-05	0.00105366	3.36374	RHOF
915	16962129	0.682645	8.87899	9.0043	1.79841e-05	0.00105366	3.36283	ABCC5
916	16690594	-0.823344	9.66749	-9.00236	1.80127e-05	0.00105366	3.36114	PSMA5
917	16679832	0.795718	7.18832	9.00183	1.80206e-05	0.00105366	3.36067	ZNF672
918	16806936	0.93975	8.33599	9.00019	1.80449e-05	0.00105393	3.35925	GOLGA8A,GOLGA8B
919	16966173	-0.729558	10.8347	-8.99825	1.80735e-05	0.00105446	3.35756	UBE2K
920	17066773	0.926553	5.98792	8.99214	1.81643e-05	0.00105783	3.35224
921	16834327	0.798587	8.19787	8.9917	1.81708e-05	0.00105783	3.35186	NAGLU
922	16672583	-0.841367	10.0939	-8.98929	1.82069e-05	0.00105879	3.34975	PEA15
923	16959007	0.801193	8.29854	8.9864	1.82501e-05	0.00106015	3.34724	PLXND1
924	16651217	1.17005	7.0712	8.98294	1.83021e-05	0.00106202	3.34421	NA
925	17121480	0.799829	6.21184	8.97191	1.84687e-05	0.00107053	3.33459	HERC2P8
926	16919879	-1.17966	6.31875	-8.96481	1.85769e-05	0.00107563	3.32839	SLC13A3
927	16706906	-2.04589	7.58943	-8.9625	1.86122e-05	0.00107651	3.32637	ADIRF
928	16785869	1.06971	9.7306	8.95818	1.86784e-05	0.00107918	3.3226	SRSF5
929	16681304	-0.68431	9.2414	-8.95463	1.87332e-05	0.00108118	3.31949	ERRFI1
930	16994969	-0.749617	9.01509	-8.95232	1.87688e-05	0.00108207	3.31747	MTMR12
931	16913681	-0.900125	8.62551	-8.94864	1.88257e-05	0.00108419	3.31426	FAM83D
932	16813189	1.01859	7.62244	8.94464	1.88879e-05	0.0010866	3.31076	PEX11A
933	16652863	1.80887	6.30533	8.93476	1.90424e-05	0.00109432	3.3021	NA
934	16778005	1.16131	6.30864	8.93344	1.90632e-05	0.00109434	3.30094	NA
935	16757894	-0.705132	10.3107	-8.92932	1.91281e-05	0.00109689	3.29733	,GATC
936	16793805	1.02413	8.05862	8.92426	1.92082e-05	0.00110016	3.29289	ZBTB25
937	16977537	0.942928	5.96862	8.92288	1.92301e-05	0.00110016	3.29168	HPSE
938	16961826	-0.857021	8.15843	-8.92183	1.92467e-05	0.00110016	3.29076	MRPL47
939	17125150	-1.47395	4.03079	-8.91868	1.92969e-05	0.00110185	3.288
940	16751995	0.869929	10.3683	8.91478	1.93591e-05	0.00110348	3.28458	NA
941	16961016	-0.70267	9.22755	-8.91432	1.93665e-05	0.00110348	3.28417	KPNA4
942	16825097	-0.741667	10.0012	-8.90995	1.94367e-05	0.001106	3.28033	NDUFAB1
943	16979515	-0.761833	10.3195	-8.909	1.9452e-05	0.001106	3.27949	CCNA2
944	16983674	-0.7142	9.59131	-8.90634	1.94948e-05	0.00110693	3.27716	C5orf22
945	16690843	-0.748838	8.41474	-8.90507	1.95152e-05	0.00110693	3.27604	WDR77
946	16846175	0.86999	6.70388	8.90408	1.95312e-05	0.00110693	3.27517	NFE2L1-DT
947	16792010	0.696744	9.64163	8.90271	1.95534e-05	0.00110693	3.27397	RALGAPA1
948	17102396	-1.11574	7.25878	-8.90084	1.95837e-05	0.00110693	3.27232	TAB3-AS2
949	16760668	0.707879	9.84076	8.90002	1.95969e-05	0.00110693	3.2716	LPCAT3
950	16818927	0.807374	9.47242	8.89904	1.96129e-05	0.00110693	3.27074	CHD9
951	17120274	1.17415	7.78914	8.89127	1.97395e-05	0.0011129	3.2639
952	16723614	0.677374	7.72226	8.88462	1.98485e-05	0.00111594	3.25805	CD44
953	16796444	0.796546	8.0953	8.88349	1.98672e-05	0.00111594	3.25705	SNHG10,SCARNA13
954	16760350	-1.23768	6.36676	-8.88339	1.98687e-05	0.00111594	3.25697	SCNN1A
955	16837061	0.900175	10.5361	8.88264	1.98812e-05	0.00111594	3.2563	SNORD104
956	17104313	0.898213	7.72319	8.88165	1.98974e-05	0.00111594	3.25544	AR
957	16793559	0.730395	8.81893	8.87969	1.99298e-05	0.00111659	3.25371	DHRS7
958	17010950	0.836158	5.77343	8.87354	2.00317e-05	0.00112113	3.24829	ANKRD6
959	17123832	-0.832081	7.0275	-8.86104	2.02407e-05	0.00113164	3.23726	FAM198B-AS1
960	16836333	0.787084	8.58829	8.85297	2.03769e-05	0.00113807	3.23013	SCPEP1
961	16795819	-0.858632	6.69706	-8.84475	2.05166e-05	0.00114468	3.22286	GPR68
962	16702547	0.94311	6.59915	8.8415	2.05723e-05	0.00114659	3.21998	OPTN
963	16963873	1.17538	5.70099	8.84011	2.0596e-05	0.00114673	3.21876	NA
964	16670894	0.687149	7.99357	8.83801	2.06321e-05	0.00114754	3.2169	TUFT1
965	16837128	0.699707	7.79402	8.83535	2.06777e-05	0.0011482	3.21455	PRKCA
966	17071577	0.987434	6.97915	8.83483	2.06867e-05	0.0011482	3.21409
967	16656957	1.3826	6.0714	8.83267	2.07239e-05	0.00114907	3.21218	NA
968	16823477	0.889333	8.45777	8.82927	2.07828e-05	0.00115115	3.20916	ADCY9
969	17003781	0.91703	7.19099	8.82685	2.08247e-05	0.00115178	3.20702	MRNIP
970	16689070	1.15139	5.85949	8.82613	2.08372e-05	0.00115178	3.20638	DDAH1
971	17118868	0.75991	9.46336	8.82284	2.08945e-05	0.00115376	3.20347	GPRC5A,MIR614
972	16850025	-0.784292	8.33815	-8.8175	2.09877e-05	0.00115771	3.19873	PYCR1
973	16878284	0.962706	7.45364	8.81221	2.10805e-05	0.00116164	3.19404	KRTCAP3
974	17014952	0.705783	9.00065	8.81093	2.11031e-05	0.00116169	3.1929	,RPL23AP87
975	16654691	1.19366	8.2218	8.80676	2.11767e-05	0.00116455	3.1892	NA
976	16656963	0.965658	4.43066	8.80359	2.12328e-05	0.00116644	3.18639	NA
977	16747661	1.13989	6.68985	8.79929	2.13093e-05	0.00116944	3.18257	MIR200C
978	16790673	0.727755	8.10073	8.79664	2.13564e-05	0.00117083	3.18021	CDH24
979	16867915	0.972124	7.36018	8.79526	2.13811e-05	0.00117098	3.17898	INSR
980	17059551	0.729645	7.83603	8.79278	2.14254e-05	0.00117221	3.17679	SRI
981	16971737	-0.730197	5.13212	-8.79132	2.14515e-05	0.00117244	3.17549	GUCY1B1
982	16810329	1.31402	6.85119	8.77264	2.17895e-05	0.00118906	3.15886	RPS27L
983	17101447	-0.719343	8.75902	-8.77208	2.17999e-05	0.00118906	3.15836	HCCS
984	16777384	-0.816022	7.9133	-8.75572	2.21009e-05	0.00120404	3.14377	SACS
985	16898911	1.29124	6.87	8.75389	2.21348e-05	0.00120404	3.14215	CYP26B1
986	16653829	1.51264	7.31003	8.75351	2.21419e-05	0.00120404	3.1418	NA
987	17045032	0.952886	6.36186	8.74364	2.23261e-05	0.00121158	3.13299	BBS9
988	17118654	1.02164	6.25949	8.743	2.23381e-05	0.00121158	3.13242	RPS8,SNORD38A,SNORD38B
989	16979133	-0.708372	6.09981	-8.74245	2.23484e-05	0.00121158	3.13193	CAMK2D
990	16812831	0.722609	8.89301	8.74035	2.23879e-05	0.00121182	3.13005	SEC11A
991	16656643	1.21594	6.00943	8.73982	2.2398e-05	0.00121182	3.12957	NA
992	16785509	1.18547	6.00403	8.73729	2.24456e-05	0.00121317	3.12731	NA
993	16651475	1.02038	9.03431	8.72852	2.26116e-05	0.0012202	3.11947	NA
994	16973038	0.972755	6.96966	8.72769	2.26275e-05	0.0012202	3.11873	CYP4V2
995	17121778	0.940877	3.77358	8.72683	2.26439e-05	0.0012202	3.11795	LINC00910
996	16938630	0.887694	9.91441	8.72104	2.27545e-05	0.00122327	3.11277	GPD1L
997	17124282	1.56251	4.3206	8.72036	2.27674e-05	0.00122327	3.11217	LINC02532
998	16951883	0.790096	6.34068	8.72026	2.27694e-05	0.00122327	3.11207	NA
999	16879968	0.712974	8.20235	8.71675	2.28368e-05	0.00122567	3.10893	PPP1R21
1000	16664620	0.975508	7.22023	8.71203	2.29278e-05	0.00122932	3.1047	EPS15-AS1
1001	16793438	1.06494	8.14422	8.70764	2.30128e-05	0.00123094	3.10076	NA
1002	17093090	1.06455	7.07136	8.70696	2.30259e-05	0.00123094	3.10016	DDX58
1003	16794935	0.763846	8.31464	8.70625	2.30397e-05	0.00123094	3.09952	TMED10
1004	17118264	1.04917	8.70078	8.70572	2.30499e-05	0.00123094	3.09905	NA
1005	17101543	0.667433	9.17787	8.7018	2.31264e-05	0.0012338	3.09552	TMSB4X
1006	17112060	-0.730542	8.75929	-8.6989	2.3183e-05	0.00123559	3.09292	PHKA1
1007	17005515	0.842809	7.09795	8.69755	2.32093e-05	0.00123576	3.09171	TRIM38
1008	17010941	0.718007	8.21915	8.6845	2.34664e-05	0.00124821	3.07999	PM20D2
1009	16853523	-0.883721	9.24803	-8.6821	2.35141e-05	0.0012492	3.07783	CHORDC1P4
1010	16855682	2.48507	4.46411	8.68012	2.35535e-05	0.0012492	3.07605	NA
1011	16753543	-1.40899	5.52979	-8.68005	2.35548e-05	0.0012492	3.07599	MIR548C
1012	16835447	0.728238	7.39481	8.67743	2.36071e-05	0.00125074	3.07363	CALCOCO2
1013	16811391	0.786227	8.83907	8.67525	2.36507e-05	0.00125181	3.07167	PARP6
1014	17063420	-0.837587	7.84428	-8.66821	2.37918e-05	0.00125803	3.06534	ZC3HAV1L
1015	16771242	-0.812327	9.19912	-8.66164	2.39245e-05	0.0012638	3.05942	PXN
1016	16685779	0.688683	10.4539	8.64588	2.42461e-05	0.00127894	3.0452	PPT1
1017	16795794	0.746483	7.93623	8.64526	2.42587e-05	0.00127894	3.04465	RPS6KA5
1018	16705959	0.985463	6.8159	8.64398	2.42852e-05	0.00127908	3.04349
1019	16752007	1.27784	9.87461	8.63842	2.43999e-05	0.00128386	3.03847	NA
1020	16816962	1.07781	6.28987	8.63517	2.44674e-05	0.00128614	3.03554	SCNN1G
1021	17097308	-0.691317	11.5289	-8.63265	2.45198e-05	0.00128764	3.03326	PTBP3
1022	16937741	-1.61342	5.85564	-8.62889	2.45981e-05	0.00129049	3.02986	PPARG
1023	16820437	1.0674	5.96957	8.62311	2.47192e-05	0.00129557	3.02464	RNU4-36P
1024	17057369	0.831404	8.56302	8.62114	2.47607e-05	0.00129648	3.02285	H2AZ2
1025	16743111	-0.668251	7.36414	-8.61942	2.47967e-05	0.0012971	3.0213	CTSC
1026	17018215	0.71348	9.8062	8.61091	2.4977e-05	0.00130495	3.01359	TAPBP
1027	17058672	0.795074	7.37422	8.60853	2.50275e-05	0.00130495	3.01144	GTF2IRD2,GTF2IRD2B
1028	17119224	0.937548	6.012	8.60811	2.50366e-05	0.00130495	3.01105	EEF1B2,,SNORD51,SNORA41
1029	16879250	-0.794746	5.53598	-8.60775	2.50442e-05	0.00130495	3.01073	GALM
1030	17000235	-1.06097	6.48256	-8.60538	2.50947e-05	0.00130539	3.00858	SPOCK1
1031	17027082	-0.749831	7.75484	-8.60507	2.51013e-05	0.00130539	3.00831	HLA-DRB3
1032	16866370	0.732592	8.52442	8.60355	2.51339e-05	0.00130582	3.00692	WASH5P
1033	16654681	1.14204	8.31364	8.5962	2.52916e-05	0.00131274	3.00026	NA
1034	16955819	-1.5868	6.28481	-8.59144	2.53944e-05	0.00131604	2.99594	NA
1035	17082250	-0.686003	9.58637	-8.59099	2.54042e-05	0.00131604	2.99553	FAM83H
1036	16796479	0.703049	9.13166	8.58848	2.54584e-05	0.00131757	2.99326	ATG2B
1037	17056992	0.733486	7.43649	8.58167	2.56068e-05	0.00132397	2.98708	GLI3
1038	16893836	0.970782	7.64622	8.57958	2.56525e-05	0.00132506	2.98518
1039	16927127	1.10471	4.42776	8.57451	2.57639e-05	0.00132953	2.98056	NA
1040	16835213	0.656497	8.38921	8.57077	2.58462e-05	0.0013325	2.97716	NPEPPS
1041	16769088	0.86538	4.53291	8.56559	2.59608e-05	0.00133447	2.97245	SLC5A8
1042	16855178	-0.937791	9.36571	-8.56537	2.59658e-05	0.00133447	2.97225	NA
1043	16810972	1.36699	6.51577	8.56454	2.59841e-05	0.00133447	2.9715	RPL4,,SNORD18B,SNORD16
1044	16810973	1.36699	6.51577	8.56454	2.59841e-05	0.00133447	2.9715	NA
1045	16651473	1.27009	7.58268	8.55771	2.61363e-05	0.001341	2.96528	NA
1046	16970906	1.29438	6.51962	8.55532	2.61897e-05	0.00134246	2.96311	MGST2
1047	16759500	-0.905485	8.32584	-8.5533	2.6235e-05	0.0013435	2.96127	NOC4L
1048	17112910	-0.904688	4.13577	-8.54954	2.63194e-05	0.00134654	2.95784	TMSB15A
1049	16675698	-0.875754	6.53273	-8.5453	2.6415e-05	0.00135001	2.95398	INAVA
1050	16860545	-0.756439	8.98476	-8.54431	2.64376e-05	0.00135001	2.95307	NUDT19
1051	16654659	1.00411	11.3897	8.54064	2.65207e-05	0.00135119	2.94973	NA
1052	17030026	0.711917	9.76509	8.53969	2.65423e-05	0.00135119	2.94886	TAPBP
1053	17032710	0.711917	9.76509	8.53969	2.65423e-05	0.00135119	2.94886	TAPBP
1054	17005542	-0.751191	5.74657	-8.53855	2.65684e-05	0.00135119	2.94781	HFE
1055	16650329	0.990821	6.58325	8.53773	2.65868e-05	0.00135119	2.94707	NA
1056	16856483	-0.787234	9.13374	-8.53663	2.6612e-05	0.00135119	2.94607	MIDN
1057	16849274	-0.673533	11.134	-8.52879	2.67915e-05	0.00135799	2.93891	ST6GALNAC2
1058	16656847	1.12558	6.15538	8.52857	2.67965e-05	0.00135799	2.93871	NA
1059	16916233	-0.870821	6.30474	-8.52511	2.6876e-05	0.00136073	2.93555	MYT1,
1060	16653931	1.16553	7.97027	8.51968	2.70017e-05	0.00136302	2.93058	NA
1061	16654043	1.16553	7.97027	8.51968	2.70017e-05	0.00136302	2.93058	NA
1062	17028313	-0.949603	5.14921	-8.51739	2.70547e-05	0.00136302	2.92849	HLA-DRA,
1063	17119498	1.04995	9.28867	8.51657	2.70737e-05	0.00136302	2.92774	SNHG32,SNORD52
1064	17119536	1.04995	9.28867	8.51657	2.70737e-05	0.00136302	2.92774	SNHG32,SNORD52
1065	17119598	1.04995	9.28867	8.51657	2.70737e-05	0.00136302	2.92774	SNHG32,SNORD52
1066	17052034	-1.21379	5.99734	-8.51525	2.71044e-05	0.00136328	2.92654	NA
1067	16997199	0.82492	6.61825	8.51178	2.71854e-05	0.00136607	2.92336	ENC1
1068	16754111	-1.11684	6.72548	-8.50975	2.72328e-05	0.00136717	2.9215	KCNMB4
1069	16975084	-0.799817	6.62519	-8.50314	2.73879e-05	0.00137244	2.91545	ARAP2
1070	16690704	1.33361	5.31168	8.5031	2.73889e-05	0.00137244	2.91541	SLC16A4
1071	16759604	-0.825574	9.08702	-8.50121	2.74333e-05	0.00137293	2.91369	PGAM5
1072	17121832	1.0738	7.67941	8.49887	2.74887e-05	0.00137293	2.91154	NA
1073	17113866	0.745153	9.86293	8.49886	2.74889e-05	0.00137293	2.91153	THOC2
1074	17040221	0.710187	9.77035	8.49834	2.75011e-05	0.00137293	2.91106	TAPBP
1075	17098004	-0.631783	10.574	-8.49715	2.75294e-05	0.00137306	2.90996	RAB14
1076	17005077	0.790707	8.84882	8.49334	2.76196e-05	0.00137628	2.90647	MYLIP
1077	16942432	-1.48339	5.53766	-8.48923	2.77174e-05	0.00137988	2.90271	PRICKLE2-AS2
1078	16847821	1.27754	8.69337	8.48552	2.78062e-05	0.0013827	2.8993	NA
1079	16654683	1.78337	7.7078	8.4847	2.78258e-05	0.0013827	2.89855	NA
1080	16763964	1.05771	11.5988	8.48257	2.7877e-05	0.00138396	2.89659	SNORA2C,MIR1291
1081	16674618	0.84154	7.87767	8.47969	2.79462e-05	0.00138611	2.89395	IER5
1082	16771572	-1.24501	9.10151	-8.47598	2.80357e-05	0.00138927	2.89054	NA
1083	17078539	0.924141	6.54296	8.47193	2.81337e-05	0.00139284	2.88682	ZNF704
1084	16994373	-0.76691	8.69219	-8.46964	2.81893e-05	0.0013943	2.88472	DAP
1085	16753125	0.7082	10.897	8.46762	2.82385e-05	0.00139479	2.88286	OS9
1086	16836677	1.06729	7.95529	8.46709	2.82512e-05	0.00139479	2.88238
1087	16654689	1.22399	9.2657	8.46601	2.82777e-05	0.00139482	2.88138	NA
1088	16989955	0.930104	5.96104	8.46166	2.8384e-05	0.00139877	2.87739	PURA,IGIP
1089	17045656	0.642494	7.51552	8.45996	2.84256e-05	0.00139954	2.87582	YKT6
1090	16849400	1.1348	7.23197	8.45857	2.84598e-05	0.00139993	2.87454	SOCS3
1091	16786010	0.802773	9.23164	8.45741	2.84883e-05	0.00140005	2.87347	SIPA1L1
1092	17122798	0.794217	4.64123	8.4481	2.87182e-05	0.00141006	2.86491	MIR646HG
1093	17075731	0.767088	7.99453	8.43669	2.90029e-05	0.00142123	2.8544	CLU
1094	16877297	1.73958	6.14309	8.43594	2.90218e-05	0.00142123	2.8537	TRIB2
1095	16654693	1.25396	9.65192	8.43581	2.90252e-05	0.00142123	2.85358	NA
1096	16977396	0.695505	8.17473	8.4335	2.90833e-05	0.0014227	2.85145	SCD5
1097	17045708	0.684169	7.88724	8.4325	2.91084e-05	0.0014227	2.85053	ZMIZ2
1098	16656767	1.52442	5.19276	8.42814	2.92184e-05	0.00142678	2.84651	NA
1099	16651235	1.54927	6.87151	8.4242	2.93183e-05	0.00143036	2.84287	NA
1100	17003682	0.819764	9.57416	8.42026	2.94184e-05	0.00143393	2.83923	HNRNPH1
1101	16761789	-0.774671	9.06442	-8.41709	2.94995e-05	0.00143608	2.8363	WBP11
1102	16858958	-0.830518	8.38608	-8.4156	2.95377e-05	0.00143608	2.83492	MISP3
1103	16663804	2.18685	5.91242	8.41539	2.95428e-05	0.00143608	2.83474	NA
1104	17098698	-0.641642	10.7007	-8.41303	2.96034e-05	0.00143671	2.83255	FAM102A
1105	16703034	2.03742	5.92168	8.41197	2.96306e-05	0.00143671	2.83157
1106	16940615	0.769072	8.15658	8.41175	2.96362e-05	0.00143671	2.83137	WDR6
1107	17037511	0.698477	9.76834	8.40651	2.97713e-05	0.00144196	2.82652	TAPBP
1108	16925752	1.08031	8.31562	8.40016	2.99358e-05	0.00144747	2.82065	HMGN1
1109	16924327	-0.734914	7.63569	-8.40003	2.99391e-05	0.00144747	2.82053	C21orf91
1110	17125686	0.952211	7.56655	8.39541	3.00595e-05	0.00145198	2.81625	,LINC00893,LINC00894
1111	17125102	1.02339	4.19502	8.39421	3.00909e-05	0.00145219	2.81514
1112	16914096	0.980293	8.50711	8.39243	3.01374e-05	0.00145234	2.81349	KCNK15
1113	16836868	0.703875	10.8405	8.39165	3.0158e-05	0.00145234	2.81276	TANC2
1114	16907044	0.841468	7.97196	8.39099	3.01753e-05	0.00145234	2.81215	SATB2
1115	16786403	-0.786485	5.26868	-8.38267	3.03943e-05	0.00145939	2.80444	BBOF1
1116	16810976	1.16767	8.39424	8.38174	3.04188e-05	0.00145939	2.80358	RPL4,SNORD18A
1117	16810977	1.16767	8.39424	8.38174	3.04188e-05	0.00145939	2.80358	NA
1118	16651219	1.6513	7.02677	8.38064	3.04481e-05	0.00145939	2.80256	NA
1119	17118662	0.751796	8.31748	8.38027	3.04578e-05	0.00145939	2.80222	RABGGTB,SNORD45C
1120	17119482	1.29376	7.97831	8.37856	3.05031e-05	0.00146026	2.80063	SNHG5,SNORD50B
1121	17037192	-0.685014	7.78464	-8.37624	3.05647e-05	0.0014619	2.79848	HLA-DRB4
1122	16835386	0.673987	8.16774	8.37275	3.06577e-05	0.00146504	2.79524	SNX11
1123	17052823	-0.934518	8.43657	-8.36896	3.0759e-05	0.00146857	2.79172	ZYX
1124	16771575	-1.20689	10.1201	-8.36731	3.08031e-05	0.00146866	2.7902	NA
1125	16900737	1.24877	7.46612	8.36685	3.08157e-05	0.00146866	2.78976	ANKRD36B
1126	16817824	-0.973564	7.50001	-8.36334	3.09098e-05	0.00147099	2.78651	CORO1A
1127	17028942	0.946906	6.262	8.36299	3.09195e-05	0.00147099	2.78618	CDSN
1128	16669288	-0.84467	8.98933	-8.35898	3.10276e-05	0.00147483	2.78245	WDR3
1129	17121278	0.800602	5.268	8.35617	3.11037e-05	0.00147602	2.77984
1130	17088929	-0.693362	7.90212	-8.35602	3.11078e-05	0.00147602	2.7797	NEK6
1131	16706259	-0.691495	9.96692	-8.34968	3.12802e-05	0.00148289	2.77381	KAT6B
1132	17123892	1.06024	7.57441	8.34348	3.14501e-05	0.00148852	2.76803	NA
1133	16654647	1.07409	12.009	8.34212	3.14874e-05	0.00148852	2.76677	NA
1134	17120998	0.656435	7.23674	8.34132	3.15092e-05	0.00148852	2.76603	,MRPS31P5
1135	16883194	1.10053	7.96958	8.3413	3.15099e-05	0.00148852	2.766
1136	16679557	0.760303	8.41345	8.33362	3.1722e-05	0.00149722	2.75885	COX20
1137	16786601	1.19768	6.56551	8.33261	3.17501e-05	0.00149722	2.75791	LINC01220
1138	17085187	0.684288	7.64573	8.32979	3.18283e-05	0.00149888	2.75528	GLIDR,
1139	16656833	1.02036	7.07155	8.32933	3.1841e-05	0.00149888	2.75486	NA
1140	17123026	-0.638299	7.64727	-8.32471	3.197e-05	0.00150363	2.75054	SLC25A15P2,SLC25A15P3,SLC25A15P5,SLC25A15P1
1141	17051236	-0.662642	10.7698	-8.32162	3.20566e-05	0.00150527	2.74766	CALU
1142	16789059	0.649648	9.97151	8.32088	3.20773e-05	0.00150527	2.74697	RCOR1
1143	16957568	-0.627267	11.6024	-8.31948	3.21167e-05	0.00150527	2.74566	NAA50
1144	16962105	-0.659303	7.25366	-8.31946	3.21172e-05	0.00150527	2.74564	,MAP6D1
1145	16994045	-0.765667	7.58356	-8.31074	3.23633e-05	0.00151548	2.7375	MRPL36
1146	17013728	-0.770742	8.11867	-8.30682	3.24747e-05	0.00151851	2.73384	MTHFD1L
1147	16809596	-0.731037	7.11652	-8.30647	3.24846e-05	0.00151851	2.73351	RAB27A
1148	16653513	0.996022	7.6065	8.30546	3.25133e-05	0.00151852	2.73257	NA
1149	16917468	-0.773386	9.35958	-8.30437	3.25443e-05	0.00151865	2.73155	RRBP1
1150	16808324	0.829353	6.38641	8.30329	3.25753e-05	0.00151877	2.73054	PPIP5K1,
1151	17121806	1.13726	6.05894	8.30194	3.26136e-05	0.00151924	2.72928	NA
1152	16767020	-0.974591	3.50326	-8.29477	3.28193e-05	0.0015275	2.72257	C12orf56
1153	16717520	1.00872	9.91602	8.29372	3.28496e-05	0.00152758	2.72159	CWF19L1,SNORA12
1154	16808326	0.80766	8.91179	8.29109	3.29254e-05	0.00152978	2.71913	PPIP5K1,
1155	16840919	0.740739	8.25833	8.2842	3.31252e-05	0.00153773	2.71268	CTC1
1156	16980126	1.36034	5.91704	8.28141	3.32064e-05	0.00154016	2.71006	RNF150
1157	16799667	0.701708	6.73275	8.27695	3.33368e-05	0.00154359	2.70588	ZFYVE19
1158	17103282	-0.710647	8.84204	-8.27643	3.3352e-05	0.00154359	2.7054	FTSJ1
1159	17061129	1.01215	8.01437	8.27593	3.33667e-05	0.00154359	2.70493	RASA4B,RASA4,
1160	16852647	-0.853598	6.66002	-8.27392	3.34257e-05	0.00154499	2.70304	ZNF532
1161	16911651	-0.689949	8.0198	-8.27142	3.34992e-05	0.00154705	2.7007	DSTN
1162	17070620	0.900019	5.65812	8.26984	3.35459e-05	0.00154732	2.69921
1163	16780917	1.23962	6.75595	8.26927	3.35627e-05	0.00154732	2.69868	IRS2
1164	16656827	0.985615	7.43038	8.26711	3.36265e-05	0.00154848	2.69665	NA
1165	16812779	1.502	6.63145	8.26646	3.36457e-05	0.00154848	2.69604	,UBE2Q2P1
1166	16745561	0.986363	6.93603	8.26402	3.3718e-05	0.00155003	2.69375	HSPA8,SNORD14E,SNORD14D
1167	17053019	-0.715723	9.79361	-8.26181	3.37836e-05	0.00155003	2.69168	CUL1
1168	16702047	-0.652392	10.5449	-8.26145	3.37942e-05	0.00155003	2.69134	NET1
1169	16740037	-0.815714	7.08135	-8.26143	3.37951e-05	0.00155003	2.69132	MAP4K2
1170	17092579	0.961487	6.59394	8.25967	3.38473e-05	0.0015511	2.68967	TTC39B
1171	16773967	0.681911	8.24457	8.25692	3.39293e-05	0.00155353	2.68709	NBEA
1172	16921591	-0.649517	8.83453	-8.25247	3.40626e-05	0.00155748	2.6829	USP25
1173	16876978	0.886685	6.80716	8.25124	3.40995e-05	0.00155748	2.68175	GRHL1
1174	17103303	-0.922211	7.99807	-8.25113	3.41027e-05	0.00155748	2.68165	PORCN
1175	16755542	0.688617	7.683	8.24729	3.42184e-05	0.00155878	2.67803	APAF1
1176	16691403	-0.908677	7.2006	-8.24722	3.42204e-05	0.00155878	2.67797	CD58
1177	17047881	0.974328	9.53953	8.24588	3.42609e-05	0.00155878	2.67671	DMTF1
1178	16878583	0.718074	7.12233	8.24543	3.42746e-05	0.00155878	2.67628	SNORD92
1179	17087992	-0.728491	8.01654	-8.24537	3.42764e-05	0.00155878	2.67622	ABITRAM
1180	17051376	-1.03725	7.06319	-8.24363	3.43289e-05	0.00155984	2.67459	TSPAN33
1181	16654769	1.02157	8.6108	8.23619	3.45548e-05	0.00156854	2.66759	NA
1182	16848953	-0.726988	6.78911	-8.23507	3.45892e-05	0.00156854	2.66653	TRIM47
1183	16715626	0.738773	7.64072	8.23444	3.46082e-05	0.00156854	2.66595	NA
1184	16809346	-0.726242	10.5171	-8.23241	3.46704e-05	0.00156988	2.66403	LEO1
1185	17063996	-0.887272	7.11454	-8.23157	3.46962e-05	0.00156988	2.66324	ARHGEF35
1186	16871642	-1.09009	5.88565	-8.22744	3.48229e-05	0.00157371	2.65935	LINC00665
1187	16966159	-1.07228	5.71789	-8.22569	3.48765e-05	0.00157371	2.6577	NA
1188	17117636	1.04889	5.29843	8.22523	3.48907e-05	0.00157371	2.65727	RPS6KA5
1189	17028028	0.784163	9.25506	8.22499	3.48982e-05	0.00157371	2.65704	SNHG32,SNORD48
1190	16776658	0.644947	8.30908	8.22398	3.49292e-05	0.00157378	2.65609	ATP11A
1191	16786064	0.878391	6.41498	8.22261	3.49718e-05	0.00157438	2.65479	RGS6
1192	16763911	0.686728	6.80375	8.22158	3.50035e-05	0.00157448	2.65382	ZNF641
1193	16813372	0.798465	8.28552	8.21639	3.51642e-05	0.00158039	2.64894	,VPS33B
1194	16939023	0.708248	6.60538	8.21328	3.52613e-05	0.00158342	2.64599	CTDSPL
1195	17063981	-0.671847	8.99169	-8.20941	3.53822e-05	0.00158752	2.64234	TCAF1
1196	16834015	-0.921687	8.21418	-8.20682	3.54633e-05	0.00158983	2.6399	RAPGEFL1
1197	16872621	-2.33443	6.48504	-8.20587	3.54931e-05	0.00158984	2.639	NA
1198	16812997	0.81345	8.20886	8.20434	3.55413e-05	0.00159067	2.63755	,DET1
1199	16899271	0.660633	6.76001	8.19992	3.56804e-05	0.00159556	2.63338	CCDC142
1200	16993302	-0.770761	5.60804	-8.19493	3.58384e-05	0.00160129	2.62867	ZFP2
1201	16770475	-1.12329	6.52888	-8.19325	3.58918e-05	0.00160195	2.62708	RASAL1
1202	16845971	1.59875	4.17611	8.19259	3.59129e-05	0.00160195	2.62645	MAPT-AS1
1203	17094378	0.84055	7.73627	8.18997	3.59963e-05	0.00160433	2.62397	GLIDR,
1204	16785858	0.726152	6.98982	8.18809	3.60564e-05	0.00160568	2.62219	SUSD6
1205	16896502	0.944478	6.61249	8.18637	3.61114e-05	0.00160679	2.62056	PRKD3
1206	16846476	0.808696	8.73195	8.18036	3.63044e-05	0.00161404	2.61488	SLC35B1
1207	16697686	-0.684127	8.43412	-8.17714	3.64083e-05	0.00161732	2.61182	ZNF281
1208	17125158	0.733268	8.03635	8.17276	3.65499e-05	0.00162226	2.60768	LINC00963
1209	16656155	0.784729	7.7298	8.16975	3.66479e-05	0.00162527	2.60482	NA
1210	16676547	-0.758816	6.33385	-8.16558	3.67837e-05	0.00162995	2.60087	CTSE
1211	16798895	0.923488	6.63157	8.16201	3.69007e-05	0.00163378	2.59748	GOLGA8R,GOLGA8Q,GOLGA8O,GOLGA8N
1212	17088652	-0.701491	7.32457	-8.16048	3.69508e-05	0.00163465	2.59603	GSN
1213	16689096	1.02643	3.42608	8.15394	3.71665e-05	0.00164283	2.58982
1214	16793741	0.767603	8.63359	8.15033	3.7286e-05	0.00164676	2.58639	WDR89
1215	16650405	0.786503	8.13058	8.14455	3.74782e-05	0.00165388	2.5809	NA
1216	17076063	-0.634757	10.2536	-8.13987	3.76346e-05	0.0016585	2.57646	GSR
1217	16969495	0.680384	9.69587	8.13957	3.76447e-05	0.0016585	2.57617	NPNT
1218	16943375	-0.700892	9.99994	-8.13798	3.7698e-05	0.00165949	2.57466	TFG
1219	16755536	1.6969	7.31089	8.13523	3.77907e-05	0.0016622	2.57204	NA
1220	17039907	-0.768444	8.33163	-8.13042	3.7953e-05	0.00166797	2.56746	HLA-DRB3
1221	17079740	0.840986	6.61293	8.12741	3.80548e-05	0.00167107	2.5646
1222	16752477	0.727053	8.75283	8.12426	3.8162e-05	0.0016738	2.5616	RPL41
1223	16922584	-0.858027	8.47814	-8.12375	3.81793e-05	0.0016738	2.56111	CHAF1B
1224	17087588	-0.82332	6.4385	-8.11748	3.83935e-05	0.00168182	2.55514	TMEFF1
1225	16681390	0.955538	6.98027	8.11599	3.84445e-05	0.00168267	2.55372	ENO1
1226	16906509	0.88268	6.41334	8.11149	3.85993e-05	0.00168807	2.54943	NEMP2
1227	16759324	-0.758697	7.27063	-8.10634	3.87774e-05	0.00169448	2.54451	MMP17
1228	16653297	0.770473	7.76859	8.10311	3.88894e-05	0.00169624	2.54143	NA
1229	16653399	0.770473	7.76859	8.10311	3.88894e-05	0.00169624	2.54143	NA
1230	16873174	-0.747053	7.67666	-8.10193	3.89304e-05	0.00169624	2.54031	,ZNF229
1231	17122666	1.00502	7.09568	8.10099	3.89634e-05	0.00169624	2.5394	CYTOR,MIR4435-2HG
1232	16757416	-0.852275	8.4083	-8.10063	3.8976e-05	0.00169624	2.53906	RITA1
1233	16891491	0.871251	5.70226	8.09826	3.90586e-05	0.00169846	2.5368	LINC02832
1234	17121154	0.849753	8.40824	8.0951	3.9169e-05	0.00170089	2.53378	WHAMMP3
1235	16870144	-0.738852	8.73299	-8.09485	3.91779e-05	0.00170089	2.53354	NR2F6
1236	16835071	0.789363	7.9674	8.0918	3.92847e-05	0.00170415	2.53063	LRRC37A,LRRC37A2,LRRC37A3
1237	17122644	1.35684	6.1749	8.08864	3.93962e-05	0.0017076	2.5276	MIR4435-2HG
1238	16886656	0.824658	6.6426	8.08226	3.96218e-05	0.001716	2.5215	KCNJ3
1239	16764564	0.760872	6.89821	8.07993	3.97046e-05	0.00171819	2.51927	LIMA1
1240	16847393	0.870462	9.93886	8.07859	3.97525e-05	0.00171888	2.51799	SCARNA20
1241	16949759	0.705332	9.15447	8.07731	3.97978e-05	0.00171945	2.51677	HES1
1242	16666392	0.695966	7.70736	8.07335	3.99394e-05	0.00172343	2.51298	MIGA1
1243	17045787	0.981019	7.22037	8.07258	3.99671e-05	0.00172343	2.51224	RAMP3
1244	16948871	-0.664142	9.79539	-8.07204	3.99863e-05	0.00172343	2.51172	PSMD2
1245	16739165	0.922769	7.33915	8.06396	4.02773e-05	0.00173458	2.50398	FADS3
1246	16912379	-0.61395	10.9498	-8.06219	4.03414e-05	0.00173594	2.50228	TPX2
1247	16815064	-1.76702	8.28317	-8.0555	4.05843e-05	0.00174499	2.49587	NA
1248	16771787	0.840442	7.20514	8.04952	4.08029e-05	0.00175182	2.49013	HCAR1
1249	17094855	0.918556	8.36578	8.04851	4.084e-05	0.00175182	2.48915	ABHD17B
1250	16664624	0.669841	7.80698	8.04848	4.0841e-05	0.00175182	2.48913	OSBPL9
1251	16748396	1.03184	6.07596	8.04603	4.09311e-05	0.00175428	2.48678	LINC01252
1252	16666013	0.763012	8.5379	8.04408	4.10028e-05	0.00175595	2.4849	SRSF11
1253	17010295	0.754445	6.24783	8.04005	4.11519e-05	0.00175913	2.48103	DDX43
1254	16807454	0.904866	6.3057	8.04002	4.11531e-05	0.00175913	2.481	RAD51-AS1
1255	16828520	-0.76356	9.80041	-8.03928	4.11803e-05	0.00175913	2.48029	NA
1256	17009233	-0.721692	11.1383	-8.03852	4.12084e-05	0.00175913	2.47956	NA
1257	16829638	0.757388	8.53014	8.03637	4.12885e-05	0.00176115	2.47749	SGSM2
1258	16880251	0.832521	3.70337	8.03448	4.13587e-05	0.00176144	2.47567
1259	16654319	1.08117	6.11607	8.03422	4.13685e-05	0.00176144	2.47542	NA
1260	17021922	0.827583	9.2725	8.03353	4.1394e-05	0.00176144	2.47476	PNISR
1261	17023810	-0.914423	5.16401	-8.03249	4.14327e-05	0.00176169	2.47376	SGK1
1262	16712825	-0.644066	8.30016	-8.02969	4.15374e-05	0.00176475	2.47107	MPP7
1263	16830220	0.986252	7.88648	8.02337	4.17745e-05	0.00177341	2.46498	ALOX12P2
1264	16698407	0.793776	6.21077	8.02096	4.18653e-05	0.00177586	2.46266	LRRN2
1265	16914743	0.901321	9.10964	8.01694	4.20172e-05	0.0017809	2.45879	ZFAS1,SNORD12B,
1266	16650295	1.16408	6.81426	8.01438	4.21145e-05	0.00178352	2.45632	NA
1267	16840723	0.997153	6.95835	8.01356	4.21456e-05	0.00178352	2.45554	SAT2
1268	16656407	1.08708	8.88696	8.01111	4.22387e-05	0.00178605	2.45318	NA
1269	16794220	0.611473	9.74492	8.00976	4.22901e-05	0.00178682	2.45188	DCAF5
1270	16819325	0.711848	9.17568	8.00862	4.23336e-05	0.00178725	2.45078	HERPUD1
1271	16871158	-0.728265	5.77286	-8.00432	4.24982e-05	0.00179146	2.44663
1272	16761858	0.61893	5.86692	8.00376	4.25198e-05	0.00179146	2.44609	RERG
1273	16830302	0.774863	9.45467	8.00314	4.25437e-05	0.00179146	2.44549	ACADVL
1274	16878731	-0.877779	6.4716	-8.00253	4.25671e-05	0.00179146	2.4449	EHD3
1275	16946513	0.941706	6.83281	7.99995	4.26665e-05	0.00179357	2.44241	TRPC1
1276	17120092	1.62978	5.30668	7.99949	4.26842e-05	0.00179357	2.44197	JAK1,LINC01359
1277	16983172	-0.686517	10.8129	-7.9924	4.29584e-05	0.00180368	2.43512	CCT5
1278	17125058	0.764513	6.30309	7.99007	4.30491e-05	0.00180608	2.43287
1279	16698947	-0.824783	11.4204	-7.98584	4.32139e-05	0.00181157	2.42878	RNU5A-8P
1280	16914733	0.836167	11.1093	7.98045	4.34252e-05	0.00181804	2.42357	ZFAS1,SNORD12
1281	16787929	0.699623	6.05842	7.98004	4.34412e-05	0.00181804	2.42318	DICER1-AS1
1282	16895344	0.701237	7.06687	7.97931	4.34699e-05	0.00181804	2.42247	DNMT3A
1283	17089027	-0.743724	8.0127	-7.97212	4.37537e-05	0.00182746	2.41552	ARPC5L
1284	16883088	0.687232	8.6173	7.97188	4.37633e-05	0.00182746	2.41528	CNNM3
1285	16931339	0.780223	5.4827	7.96955	4.38559e-05	0.0018299	2.41302	PPARA
1286	16671791	0.766855	6.85088	7.96645	4.39792e-05	0.00183362	2.41002	NA
1287	16716525	0.811843	5.97743	7.96203	4.41557e-05	0.00183883	2.40574	CPEB3
1288	16686557	0.596404	8.27425	7.9616	4.41729e-05	0.00183883	2.40533	PIK3R3,
1289	17067926	-0.772699	9.12936	-7.95772	4.43287e-05	0.00184389	2.40156	PLPBP
1290	16754889	-1.17694	4.49258	-7.95572	4.44092e-05	0.00184532	2.39962	NA
1291	16656377	1.00518	8.45813	7.95445	4.44603e-05	0.00184532	2.39839	NA
1292	17003077	-0.629273	7.35769	-7.9538	4.44866e-05	0.00184532	2.39776	RNF44
1293	16772144	-0.689683	8.58754	-7.95344	4.45009e-05	0.00184532	2.39742	SCARB1
1294	17091043	0.958024	6.78054	7.95151	4.45791e-05	0.00184714	2.39554	NA
1295	16752014	1.05791	11.2916	7.9466	4.47784e-05	0.00185396	2.39077	NA
1296	17052353	-0.733958	8.1278	-7.94175	4.49759e-05	0.00186022	2.38607	AGK
1297	16997399	1.05711	9.65657	7.94025	4.50371e-05	0.00186022	2.38462	SNORA47
1298	16962754	0.714232	8.74312	7.94019	4.50395e-05	0.00186022	2.38456	MB21D2
1299	16654695	1.23136	7.79375	7.93949	4.50683e-05	0.00186022	2.38387	NA
1300	16877019	0.590851	9.8184	7.93777	4.51386e-05	0.00186169	2.38221	RRM2
1301	17122106	-1.10475	5.0231	-7.93641	4.51946e-05	0.00186257	2.38088	LINC00665,LINC01535
1302	17010104	-1.47851	4.27644	-7.9302	4.54503e-05	0.00187167	2.37485	FAM135A
1303	16770789	-0.653628	9.8114	-7.92886	4.55059e-05	0.00187252	2.37355	C12orf49
1304	16661497	-0.652411	4.8915	-7.92739	4.55669e-05	0.00187359	2.37211	THEMIS2
1305	17122216	1.40048	6.74662	7.92596	4.56261e-05	0.00187459	2.37073	ANKRD36BP2,ANKRD36,ANKRD36B
1306	17123268	0.702103	7.06903	7.92475	4.56765e-05	0.00187522	2.36955	TRANK1
1307	16791494	1.20438	4.11901	7.91958	4.5892e-05	0.00188179	2.36451	NA
1308	16745870	0.877476	7.75709	7.91691	4.60035e-05	0.00188179	2.36192	CDON
1309	17042101	0.614796	8.71705	7.91657	4.60178e-05	0.00188179	2.36159	NEU1
1310	16858823	-0.699717	10.3554	-7.91644	4.60231e-05	0.00188179	2.36146	NACC1
1311	17054040	-0.688912	9.95793	-7.91617	4.60347e-05	0.00188179	2.36119	UBE3C
1312	16655859	0.869802	5.58356	7.91587	4.60472e-05	0.00188179	2.36091	NA
1313	16689828	0.828929	5.92814	7.91166	4.62241e-05	0.00188603	2.35681	ARHGAP29
1314	17022939	-0.727842	8.41598	-7.91124	4.62418e-05	0.00188603	2.3564	TSPYL4
1315	17119062	0.983795	7.92819	7.91089	4.62564e-05	0.00188603	2.35606	SNHG29,SNORD49B,SNORD49A
1316	16653927	1.25512	8.67076	7.90693	4.64235e-05	0.00188997	2.3522	NA
1317	16654039	1.25512	8.67076	7.90693	4.64235e-05	0.00188997	2.3522	NA
1318	16803926	0.66347	7.6332	7.90608	4.64597e-05	0.00189001	2.35137	UBE2Q2P2
1319	16888578	0.649941	7.02394	7.89581	4.68971e-05	0.00190572	2.34135	GULP1
1320	17063394	-0.830194	8.32964	-7.89534	4.69171e-05	0.00190572	2.3409	KIAA1549
1321	16697599	0.777721	7.45145	7.88821	4.72236e-05	0.00191672	2.33393	DENND1B
1322	16846152	0.73151	6.99751	7.8869	4.728e-05	0.00191756	2.33266	SP2-AS1
1323	16656955	0.915938	5.51666	7.88265	4.74641e-05	0.00192357	2.3285	NA
1324	17114690	1.05286	5.70544	7.87972	4.75914e-05	0.00192727	2.32564	SOX3
1325	16806564	0.889248	7.85445	7.87355	4.78608e-05	0.00193672	2.3196	MTMR10
1326	16655897	1.45206	5.26153	7.87265	4.78998e-05	0.00193684	2.31873	NA
1327	16679967	1.17335	5.34762	7.8712	4.79636e-05	0.00193795	2.31731	NA
1328	17086634	-0.993452	9.93361	-7.86627	4.81803e-05	0.00194517	2.31249	CKS2
1329	16830573	0.660033	13.1092	7.86549	4.82147e-05	0.00194517	2.31172	EIF4A1,SNORA48
1330	16665687	0.853443	7.70873	7.86404	4.82788e-05	0.00194523	2.3103	DNAJC6
1331	16722412	0.695374	4.87207	7.86382	4.82887e-05	0.00194523	2.31008	NA
1332	17016369	-1.53241	5.80145	-7.85772	4.8559e-05	0.00195464	2.30411	H2BC3
1333	16773183	-0.771762	6.27556	-7.85679	4.86005e-05	0.00195485	2.3032	PCOTH
1334	16732248	0.684158	6.5369	7.85323	4.87593e-05	0.00195853	2.29971	NLRX1
1335	16918569	0.952844	6.65049	7.85215	4.88078e-05	0.00195853	2.29865	GGT7
1336	16913737	-0.619683	11.231	-7.85148	4.88375e-05	0.00195853	2.298	TOP1
1337	16804205	0.704383	6.97866	7.85106	4.88563e-05	0.00195853	2.29759	ZSCAN2
1338	16987986	0.776427	7.8998	7.85065	4.88746e-05	0.00195853	2.29719	EPB41L4A-AS1,SNORA13
1339	16736529	-0.649092	8.58451	-7.84508	4.91253e-05	0.0019671	2.29171	UEVLD
1340	16653765	1.14567	8.21707	7.84209	4.926e-05	0.00197102	2.28879	NA
1341	16856699	-0.762377	8.09779	-7.83989	4.93597e-05	0.00197311	2.28662	DOT1L
1342	17007620	-0.751829	9.05084	-7.83931	4.93857e-05	0.00197311	2.28606	HMGA1
1343	17014714	0.681354	8.97439	7.83415	4.96201e-05	0.001981	2.28099	AFDN
1344	16803317	0.748141	9.60123	7.83286	4.9679e-05	0.00198187	2.27973	RCN2
1345	17118430	1.22755	5.36802	7.83201	4.9718e-05	0.00198196	2.27889	NA
1346	16754966	1.03122	5.91574	7.8297	4.98237e-05	0.00198469	2.27662	ATP2B1-AS1
1347	16793885	0.76835	8.5399	7.82662	4.99649e-05	0.00198884	2.27359	RAB15
1348	16808306	0.783112	8.36049	7.82571	5.00064e-05	0.00198901	2.2727	PPIP5K1,
1349	16877555	0.678508	10.2479	7.82363	5.01024e-05	0.00199136	2.27065	RHOB
1350	17070273	0.639906	8.20183	7.82009	5.02656e-05	0.00199519	2.26717	ZBTB10
1351	16668730	-0.629191	7.67987	-7.81993	5.02732e-05	0.00199519	2.26701	DDX20
1352	16785821	0.659586	9.63642	7.81894	5.03187e-05	0.00199552	2.26604	SLC39A9
1353	16718769	0.673044	7.413	7.81033	5.07189e-05	0.0020099	2.25757	PDZD8
1354	17058905	-0.867343	10.2703	-7.80651	5.08978e-05	0.00201504	2.2538	YWHAG
1355	16685868	-1.22207	9.39627	-7.80595	5.09238e-05	0.00201504	2.25325	CITED4
1356	17036486	0.841671	7.31433	7.80339	5.1044e-05	0.00201831	2.25073	HLA-C
1357	16684391	0.693671	7.43373	7.801	5.11569e-05	0.00202128	2.24837	NKAIN1
1358	16722987	0.923888	5.10217	7.79483	5.14486e-05	0.00203097	2.24229	LUZP2
1359	16800268	0.764745	5.19533	7.793	5.15355e-05	0.00203097	2.24048	CKMT1A
1360	16654999	1.23491	5.85631	7.79265	5.15519e-05	0.00203097	2.24014	NA
1361	16825266	-0.70705	10.5971	-7.79249	5.15596e-05	0.00203097	2.23998	XPO6
1362	16810847	0.639885	8.97263	7.79112	5.16247e-05	0.00203097	2.23863	DENND4A
1363	16919418	-0.708849	8.91321	-7.78983	5.16861e-05	0.00203097	2.23736	FITM2
1364	16736807	-0.698804	6.56531	-7.78851	5.17491e-05	0.00203097	2.23606	CCDC34
1365	17089003	-1.2241	6.4236	-7.78847	5.17511e-05	0.00203097	2.23602	OLFML2A
1366	16779199	1.08203	7.48433	7.78736	5.18044e-05	0.00203097	2.23492	GUCY1B2
1367	16833698	-0.852533	10.8196	-7.78571	5.18829e-05	0.00203097	2.2333	PSMB3
1368	16728785	0.733702	5.89511	7.78471	5.19309e-05	0.00203097	2.2323	NA
1369	16743764	1.78795	5.20225	7.78443	5.19444e-05	0.00203097	2.23203	MMP13
1370	17054663	-1.58585	4.80231	-7.78366	5.19812e-05	0.00203097	2.23127	NA
1371	17121992	-0.77388	4.84536	-7.7835	5.19888e-05	0.00203097	2.23111	NA
1372	16808328	0.763006	8.70033	7.78322	5.20025e-05	0.00203097	2.23083	PPIP5K1,
1373	17063073	-0.757772	8.55012	-7.7831	5.20081e-05	0.00203097	2.23072	SLC35B4
1374	16977789	-0.631027	7.68889	-7.78121	5.20988e-05	0.0020317	2.22885	KLHL8
1375	17028016	0.697737	7.34632	7.78114	5.21025e-05	0.0020317	2.22878	SNHG32
1376	16864975	-0.959157	7.59923	-7.77793	5.22572e-05	0.00203624	2.22561	ZNF813
1377	16883647	-0.754805	7.40614	-7.77349	5.24717e-05	0.00204284	2.22122	IL1R1
1378	17017185	0.859362	10.3269	7.77286	5.25026e-05	0.00204284	2.22059	NA
1379	16901197	0.759842	11.6951	7.77103	5.25914e-05	0.00204481	2.21878	RNF149,SNORD89
1380	16819252	1.23452	7.57095	7.76933	5.2674e-05	0.00204654	2.21711	MT1F
1381	16979845	0.732358	11.5831	7.76363	5.29523e-05	0.00205586	2.21147	KRT18P54,KRT18P36
1382	16714880	1.72762	6.49598	7.76127	5.30682e-05	0.00205829	2.20913	DNAJC12
1383	16767142	0.731504	7.91106	7.76036	5.31129e-05	0.00205829	2.20823	TMBIM4
1384	16914595	1.20988	5.19916	7.76001	5.31302e-05	0.00205829	2.20788	NA
1385	17010354	0.82838	6.56938	7.75839	5.32099e-05	0.00205949	2.20628	CD109
1386	16723546	0.629306	8.2105	7.75782	5.32378e-05	0.00205949	2.20571	CAT
1387	16811994	0.612252	7.75131	7.75677	5.32896e-05	0.00206001	2.20467	PEAK1
1388	16709865	0.724618	8.00178	7.75373	5.34397e-05	0.00206185	2.20166	INPP5F
1389	17017495	0.607363	8.70753	7.7492	5.36641e-05	0.00206185	2.19718	NEU1
1390	17026875	0.607363	8.70753	7.7492	5.36641e-05	0.00206185	2.19718	NEU1
1391	17032134	0.607363	8.70753	7.7492	5.36641e-05	0.00206185	2.19718	NEU1
1392	17034509	0.607363	8.70753	7.7492	5.36641e-05	0.00206185	2.19718	NEU1
1393	17036841	0.607363	8.70753	7.7492	5.36641e-05	0.00206185	2.19718	NEU1
1394	17039585	0.607363	8.70753	7.7492	5.36641e-05	0.00206185	2.19718	NEU1
1395	16858137	0.960294	6.83908	7.74883	5.36825e-05	0.00206185	2.19681	ICAM1
1396	16784215	0.860938	7.22832	7.74882	5.36834e-05	0.00206185	2.1968	GPR137C
1397	16796094	0.684606	9.1319	7.74342	5.39525e-05	0.00206824	2.19144	ITPK1
1398	17112337	-0.922595	6.95626	-7.74319	5.39642e-05	0.00206824	2.19121	NA
1399	17051672	-0.674349	9.26169	-7.74316	5.39656e-05	0.00206824	2.19119	MKLN1
1400	16677201	-0.592866	9.65292	-7.74053	5.40972e-05	0.00207181	2.18858	DTL
1401	16771652	-0.608361	7.5732	-7.73702	5.42736e-05	0.00207708	2.1851	VPS33A
1402	17035880	-0.891931	5.11995	-7.734	5.44256e-05	0.00207845	2.1821	HLA-DRA,
1403	17038596	-0.891931	5.11995	-7.734	5.44256e-05	0.00207845	2.1821	HLA-DRA,
1404	17041225	-0.891931	5.11995	-7.734	5.44256e-05	0.00207845	2.1821	HLA-DRA,
1405	16857258	-0.705922	9.07525	-7.72973	5.46421e-05	0.00208523	2.17786	UHRF1
1406	16793644	0.779412	9.89869	7.72805	5.47273e-05	0.002087	2.17619	TMEM30B
1407	16858169	-1.01181	6.34865	-7.72725	5.47679e-05	0.00208706	2.17539	PDE4A
1408	16752017	1.44855	9.45509	7.7259	5.48366e-05	0.00208819	2.17405	NA
1409	17070221	-1.35252	6.25145	-7.72384	5.49413e-05	0.00208994	2.17201	PKIA
1410	17080450	0.744678	8.47422	7.72347	5.49605e-05	0.00208994	2.17164	EXT1
1411	17057284	0.844853	6.81117	7.72184	5.50436e-05	0.00209162	2.17002	NA
1412	16793052	-0.644213	9.85886	-7.71842	5.52191e-05	0.0020968	2.16661	GNPNAT1
1413	16838107	0.600033	8.09596	7.7172	5.52813e-05	0.00209768	2.16541	METTL23
1414	16984336	-0.662037	8.14217	-7.70797	5.57577e-05	0.00211284	2.15623	C5orf51
1415	16717783	0.700808	9.63373	7.70794	5.57597e-05	0.00211284	2.15619	OGA
1416	16999440	0.840902	5.50538	7.70289	5.60218e-05	0.00212037	2.15117
1417	17024198	0.742388	7.86991	7.70259	5.60376e-05	0.00212037	2.15087	NHSL1
1418	16810743	0.715732	7.25108	7.70168	5.6085e-05	0.00212067	2.14996	IGDCC3
1419	16682016	-0.835572	7.65351	-7.699	5.62252e-05	0.00212447	2.14729	AGMAT
1420	16839913	0.616544	8.5793	7.69585	5.63902e-05	0.00212775	2.14415	ZZEF1
1421	16952639	-0.624337	9.93333	-7.69583	5.63913e-05	0.00212775	2.14413	,HIGD1A
1422	16893600	0.684388	7.05477	7.6942	5.6477e-05	0.00212948	2.14251	D2HGDH
1423	16654567	0.864193	5.06262	7.68881	5.67618e-05	0.00213872	2.13712	NA
1424	16908782	-0.670798	9.12504	-7.6872	5.68466e-05	0.00213914	2.13553	DNPEP
1425	16960807	0.810923	8.99045	7.68652	5.68829e-05	0.00213914	2.13484	CCNL1
1426	16731918	1.06785	6.49044	7.68633	5.68926e-05	0.00213914	2.13466	TMEM25
1427	16938620	0.737693	7.56625	7.68517	5.69545e-05	0.00213961	2.1335	ZNF860
1428	17029003	0.708583	9.06195	7.68459	5.6985e-05	0.00213961	2.13292	HLA-C
1429	17097869	-0.635986	9.24628	-7.68124	5.71634e-05	0.00214481	2.12958	MEGF9
1430	16994890	-0.694867	9.48064	-7.68	5.72296e-05	0.00214566	2.12834	DROSHA
1431	16997650	1.49153	6.45887	7.67932	5.72662e-05	0.00214566	2.12765	ANKRD34B
1432	16889636	0.657333	11.0615	7.6782	5.73258e-05	0.0021464	2.12654	BMPR2
1433	16654815	1.32679	7.04456	7.67633	5.7426e-05	0.00214757	2.12467	NA
1434	16850216	-0.811068	8.11738	-7.67605	5.74411e-05	0.00214757	2.12439	SECTM1
1435	16960271	0.614908	10.6722	7.67537	5.74773e-05	0.00214757	2.12372	HLTF
1436	16771317	-0.731325	10.5829	-7.67146	5.76876e-05	0.00215392	2.11981	NA
1437	16821585	-0.701603	10.2983	-7.67046	5.77413e-05	0.00215443	2.11881	GSE1
1438	16679916	0.635614	8.60983	7.66762	5.78947e-05	0.00215616	2.11597
1439	17059628	0.578983	10.7991	7.66758	5.7897e-05	0.00215616	2.11593	CYP51A1,
1440	17016038	-1.27304	5.80814	-7.66737	5.79084e-05	0.00215616	2.11572	LNC-LBCS
1441	16740703	-0.747724	5.81403	-7.665	5.80365e-05	0.00215943	2.11335
1442	16801299	-1.38961	6.84488	-7.66371	5.8107e-05	0.00216056	2.11205	C15orf65
1443	16919508	-0.849762	8.21652	-7.66217	5.81903e-05	0.00216172	2.11052	TOMM34
1444	16838271	0.632486	8.04435	7.66164	5.8219e-05	0.00216172	2.10999	TNRC6C
1445	16786587	1.18333	6.8443	7.65705	5.84697e-05	0.00216953	2.10539	FOS
1446	16866686	-1.08287	7.3304	-7.65553	5.85527e-05	0.00217111	2.10387	ADAMTSL5
1447	17053734	-0.753848	7.79496	-7.65471	5.85978e-05	0.00217128	2.10305	GALNT11
1448	16738429	-0.643485	10.0587	-7.6523	5.87297e-05	0.00217349	2.10064	SSRP1
1449	16656411	1.19397	7.96859	7.65214	5.87385e-05	0.00217349	2.10048	NA
1450	16967484	-0.909997	3.10783	-7.65052	5.88281e-05	0.00217453	2.09885	SMR3A
1451	16683300	0.627093	5.95986	7.64977	5.88692e-05	0.00217453	2.0981	TCEA3
1452	16823100	-0.673	12.4835	-7.64942	5.88882e-05	0.00217453	2.09776	NA
1453	16843987	-0.64082	8.91065	-7.64766	5.89854e-05	0.00217661	2.09599	PCGF2
1454	16954154	0.906858	6.34114	7.64626	5.90628e-05	0.00217797	2.09459	AMIGO3,GMPPB
1455	16794888	0.896284	6.94277	7.64079	5.93662e-05	0.00218765	2.0891	ACYP1
1456	17125728	0.632563	6.34547	7.63948	5.94392e-05	0.00218884	2.08779
1457	16918832	-0.620527	8.20222	-7.63732	5.95592e-05	0.00219175	2.08563	NFS1
1458	17017180	0.907081	10.1014	7.63575	5.96471e-05	0.00219348	2.08405	NA
1459	16823561	-0.729457	9.085	-7.6335	5.97729e-05	0.00219552	2.08179	NMRAL1
1460	16792998	1.0236	7.5538	7.6333	5.97843e-05	0.00219552	2.08159	TXNDC16
1461	17052935	-0.823134	7.41131	-7.62872	6.00415e-05	0.00220345	2.07699	OR2A20P,,OR2A9P
1462	16691486	-0.670103	8.152	-7.62359	6.03308e-05	0.00221256	2.07185	GDAP2
1463	16819430	-0.846366	8.98574	-7.61949	6.05635e-05	0.00221957	2.06772	CPNE2
1464	16791734	0.655943	9.08015	7.61809	6.06433e-05	0.00222098	2.06632	HEATR5A,
1465	16669700	-0.790812	9.64341	-7.61603	6.07609e-05	0.00222377	2.06424	SEC22B,SEC22B3P,SEC22B2P
1466	17033604	-0.887997	5.18559	-7.61164	6.10117e-05	0.00223142	2.05983	HLA-DRA,
1467	16726224	-0.614373	9.03675	-7.61062	6.10702e-05	0.00223204	2.0588	STIP1
1468	17101775	0.935483	6.74839	7.60964	6.11263e-05	0.00223257	2.05782	GRPR
1469	16714798	0.739709	8.99683	7.6081	6.1215e-05	0.00223428	2.05627	JMJD1C
1470	16731654	-0.761598	6.08954	-7.60728	6.12621e-05	0.00223448	2.05545	TAGLN
1471	17059872	-0.724702	4.43036	-7.60598	6.13371e-05	0.00223488	2.05414	SGCE
1472	16671723	0.821891	7.53824	7.60564	6.13565e-05	0.00223488	2.0538	HCN3
1473	16914345	-0.671184	8.80884	-7.60397	6.14529e-05	0.00223628	2.05211	ZSWIM1
1474	16956386	-0.670158	9.00221	-7.6031	6.15032e-05	0.00223628	2.05124	ROBO1
1475	17124374	1.3328	4.61334	7.60281	6.152e-05	0.00223628	2.05095	LINC02532
1476	17031139	-0.793007	5.1922	-7.5944	6.20087e-05	0.00225192	2.04247	HLA-DRA,
1477	16770685	0.793518	6.9477	7.59396	6.20342e-05	0.00225192	2.04203	TBX3
1478	17045354	1.11238	7.45635	7.58982	6.22767e-05	0.00225919	2.03786	YAE1
1479	16990321	-0.767268	8.43903	-7.5891	6.23192e-05	0.00225921	2.03713	PCDHB14
1480	17069212	-0.587498	6.09464	-7.58426	6.26034e-05	0.0022675	2.03225	SDCBP
1481	16791898	-1.27618	6.93886	-7.58377	6.26324e-05	0.0022675	2.03176	CFL2
1482	16787799	0.755578	5.63159	7.57788	6.29811e-05	0.00227858	2.02581	IFI27L1
1483	17107676	-0.605587	7.47641	-7.57358	6.32369e-05	0.00228629	2.02147	MAMLD1
1484	16678132	1.26469	8.03055	7.57209	6.33257e-05	0.00228702	2.01997	NA
1485	16962185	-0.660547	8.65345	-7.57182	6.33423e-05	0.00228702	2.01969	ALG3
1486	17005042	-0.634885	10.2089	-7.571	6.33913e-05	0.00228725	2.01886	JARID2
1487	16755527	0.907633	7.76807	7.5691	6.35047e-05	0.0022898	2.01695	NA
1488	16654643	1.13749	10.6647	7.56584	6.37005e-05	0.00229532	2.01365	NA
1489	16933114	0.728114	7.41127	7.5649	6.3757e-05	0.00229581	2.0127	GSTT1
1490	17082947	-0.726392	8.16534	-7.56374	6.3827e-05	0.00229665	2.01153	ZNF252P
1491	17120790	0.88921	3.86337	7.56309	6.38659e-05	0.00229665	2.01087	A2MP1
1492	17023150	-0.667614	9.47902	-7.55858	6.41386e-05	0.0023049	2.00631	MAN1A1
1493	16880814	-0.824983	6.80231	-7.55398	6.44181e-05	0.0023134	2.00165	NA
1494	16696177	0.652306	9.53755	7.55162	6.45615e-05	0.0023165	1.99927	SLC19A2
1495	16728731	0.610166	6.63966	7.55115	6.45908e-05	0.0023165	1.99879	ATG16L2
1496	16837087	1.12984	6.11773	7.54954	6.46888e-05	0.00231846	1.99716	,SLC16A6P1
1497	16942202	-0.85009	6.92587	-7.54452	6.49969e-05	0.00232678	1.99207	PXK
1498	16989018	0.621438	8.25691	7.54434	6.50077e-05	0.00232678	1.99189	SLC22A5
1499	16824004	-0.664768	10.2773	-7.54198	6.51528e-05	0.00233006	1.98951	GSPT1
1500	17120100	1.12773	6.91288	7.54087	6.52214e-05	0.00233006	1.98838	NA
1501	16762126	-0.967031	4.6132	-7.54061	6.52378e-05	0.00233006	1.98811	LDHB
1502	16847897	1.12368	6.84451	7.54003	6.52732e-05	0.00233006	1.98753	LRRC37A3
1503	16810974	0.711123	9.55266	7.53698	6.54622e-05	0.0023337	1.98443	RPL4,SNORD16,SNORD18A
1504	16810975	0.711123	9.55266	7.53698	6.54622e-05	0.0023337	1.98443	NA
1505	17092208	0.690775	10.1518	7.53616	6.55128e-05	0.00233395	1.9836	ERMP1
1506	16690881	1.14752	5.11974	7.53422	6.56336e-05	0.0023367	1.98163	LINC01160
1507	17120078	0.687268	5.27368	7.52696	6.60861e-05	0.00235052	1.97427	CALR4P
1508	16718376	1.06196	7.58511	7.52659	6.61094e-05	0.00235052	1.97389	NA
1509	16771624	-0.791265	5.91241	-7.52456	6.62371e-05	0.0023535	1.97183
1510	16837065	0.806874	9.68898	7.52089	6.64678e-05	0.00236014	1.9681	CEP95
1511	16770733	0.656748	9.99182	7.51742	6.66869e-05	0.00236635	1.96458	MED13L
1512	16812053	0.80598	7.10531	7.51624	6.67612e-05	0.00236673	1.96339	TBC1D2B
1513	16698304	0.709523	6.9051	7.51585	6.6786e-05	0.00236673	1.96299	GOLT1A
1514	16709201	0.692905	10.0796	7.51004	6.71555e-05	0.00237825	1.95708	PDCD4
1515	16842237	-0.831142	11.5487	-7.50703	6.73474e-05	0.00238228	1.95402	SNORD3C
1516	16698556	0.917739	9.09469	7.50687	6.73579e-05	0.00238228	1.95385	SLC41A1
1517	16890126	0.588407	8.57122	7.50524	6.74625e-05	0.0023844	1.95219	PIKFYVE
1518	16826718	0.721293	8.32017	7.50386	6.75509e-05	0.00238595	1.95079	BBS2
1519	16656413	1.46922	9.34031	7.50025	6.77831e-05	0.00239113	1.94711	NA
1520	16818204	0.725372	8.02843	7.50019	6.77865e-05	0.00239113	1.94706	KAT8,
1521	17112439	0.8247	6.48394	7.49791	6.79338e-05	0.00239474	1.94473	RPS6KA6
1522	16767911	0.747963	7.70642	7.49005	6.84431e-05	0.00241111	1.93673	PAWR
1523	16814211	-0.774762	7.27022	-7.48899	6.85127e-05	0.00241198	1.93564	NME4
1524	16682098	0.661628	7.57631	7.48804	6.85741e-05	0.00241256	1.93468	EPHA2
1525	16804804	0.581658	11.5542	7.47976	6.91172e-05	0.00243007	1.92623	IQGAP1
1526	16873647	-0.602283	9.85923	-7.47493	6.94354e-05	0.00243966	1.92131	AP2S1
1527	16833139	-0.584728	9.81348	-7.4742	6.94842e-05	0.00243977	1.92056	PSMD11
1528	17029348	0.596688	9.41513	7.46943	6.98008e-05	0.00244929	1.91569	NEU1
1529	17118828	0.9211	8.13496	7.46676	6.99787e-05	0.00245301	1.91296	SNHG1,SNORD30,
1530	16758264	-0.838737	7.73736	-7.46611	7.0022e-05	0.00245301	1.9123	MLXIP
1531	16847251	0.898668	5.07382	7.46577	7.00443e-05	0.00245301	1.91196	MIR301A
1532	16823198	-0.890667	10.7653	-7.46491	7.01024e-05	0.00245344	1.91107	NA
1533	16665717	0.885371	6.38718	7.4636	7.01894e-05	0.00245489	1.90974	NA
1534	17122502	1.22723	5.66006	7.46284	7.02409e-05	0.00245509	1.90895	CYTOR,MIR4435-2HG
1535	16930534	-0.776013	9.86482	-7.45311	7.0896e-05	0.00247637	1.89901	EP300
1536	17086845	-0.783372	6.78121	-7.45195	7.09746e-05	0.0024775	1.89782	SUSD3
1537	16995802	0.989187	5.58759	7.44781	7.1256e-05	0.00248559	1.89358	PLCXD3
1538	17076285	-0.740912	7.71257	-7.44659	7.13386e-05	0.00248559	1.89234	RAB11FIP1
1539	17078793	-0.672057	5.59428	-7.44605	7.13759e-05	0.00248559	1.89178
1540	16808334	0.669517	8.97563	7.44581	7.13918e-05	0.00248559	1.89154	PPIP5K1,
1541	16938322	-0.795633	7.75745	-7.44498	7.14487e-05	0.00248596	1.89069	UBE2E2
1542	16718800	0.6537	7.86573	7.44373	7.15341e-05	0.00248732	1.88941	RAB11FIP2
1543	17057478	-0.702852	6.65648	-7.44278	7.15994e-05	0.00248797	1.88843	IGFBP3
1544	17097895	-0.611853	9.10021	-7.44074	7.17386e-05	0.00249067	1.88635	PSMD5
1545	16806820	0.602837	5.11986	7.44017	7.17779e-05	0.00249067	1.88576	,AVEN
1546	16828523	-0.730242	10.5512	-7.43961	7.18162e-05	0.00249067	1.88519	NA
1547	17009459	0.7697	5.07828	7.43857	7.18878e-05	0.00249154	1.88412	RN7SKP116
1548	16722299	-0.629848	7.72425	-7.43664	7.20205e-05	0.00249453	1.88215	PDE3B
1549	16745154	0.998228	10.5013	7.4329	7.22787e-05	0.00250185	1.87831	NA
1550	16654645	1.08519	12.4423	7.43092	7.24163e-05	0.002505	1.87627	NA
1551	16676764	0.58587	9.19788	7.42605	7.27548e-05	0.00251508	1.87128	CD55
1552	17121148	0.669128	9.2251	7.41791	7.33237e-05	0.00253234	1.86293	HERC2P3,HERC2P2,HERC2,HERC2P9,HERC2P4,HERC2P5,HERC2P8
1553	16715847	1.54823	3.54356	7.41736	7.33627e-05	0.00253234	1.86236	RNU6-1266P
1554	16808314	0.619772	9.16099	7.41689	7.33956e-05	0.00253234	1.86188	PPIP5K1,
1555	16960795	0.850418	5.92676	7.41214	7.37309e-05	0.00254227	1.85699	LINC00886
1556	17120404	1.29858	4.74283	7.41012	7.38735e-05	0.00254392	1.85492
1557	17017126	0.711974	8.63804	7.41012	7.38737e-05	0.00254392	1.85492	HLA-C
1558	17117515	0.796366	5.85787	7.40827	7.40053e-05	0.00254682	1.85301	NA
1559	17120156	0.851118	3.85085	7.40745	7.4063e-05	0.00254717	1.85218	NA
1560	17122654	1.7254	5.78232	7.40521	7.42224e-05	0.00255101	1.84988	CYTOR,MIR4435-2HG
1561	17074608	-0.739906	5.73264	-7.4028	7.43944e-05	0.00255529	1.84739
1562	16828897	-0.732668	7.82557	-7.39925	7.46486e-05	0.00256238	1.84374	C16orf74
1563	16945375	0.565653	7.84146	7.39757	7.47692e-05	0.00256373	1.84201	IFT122
1564	17067963	-1.05194	7.95667	-7.39737	7.47837e-05	0.00256373	1.8418	EIF4EBP1
1565	17105727	-0.984412	3.26925	-7.39624	7.48648e-05	0.00256487	1.84064
1566	16655613	1.20714	6.91904	7.3949	7.49613e-05	0.00256654	1.83926	NA
1567	16846800	0.774247	8.42262	7.39278	7.51138e-05	0.00257012	1.83708	MBTD1
1568	16807976	0.740513	7.01233	7.39052	7.5277e-05	0.00257264	1.83475	TTBK2
1569	16847199	0.83002	7.31488	7.39043	7.52834e-05	0.00257264	1.83466
1570	16783944	0.7329	9.21668	7.38815	7.54492e-05	0.0025753	1.83231	KLHDC2
1571	16840799	-0.693631	5.70074	-7.38745	7.54994e-05	0.0025753	1.83159	ALOX12B
1572	17099027	-0.767933	8.36687	-7.38698	7.55335e-05	0.0025753	1.83111	IER5L
1573	16945101	-0.741907	9.767	-7.38614	7.55946e-05	0.0025753	1.83024	MCM2
1574	16788023	0.883087	6.59103	7.38586	7.56149e-05	0.0025753	1.82995	BDKRB2
1575	16653763	0.789168	8.44298	7.38539	7.56494e-05	0.0025753	1.82947	NA
1576	17087933	-0.587083	11.082	-7.38241	7.58668e-05	0.00257787	1.82639	RAD23B
1577	16803973	0.734618	7.49341	7.38221	7.5881e-05	0.00257787	1.82619	GOLGA6L10,GOLGA6L9,GOLGA6L3
1578	16900802	0.606648	10.2007	7.38221	7.58811e-05	0.00257787	1.82619	TMEM131
1579	17035969	0.826621	7.28116	7.38126	7.59505e-05	0.00257787	1.82521	BRD2
1580	16866562	-0.81775	6.33419	-7.38106	7.59653e-05	0.00257787	1.825
1581	16683470	0.842416	6.49748	7.37748	7.62273e-05	0.00258512	1.82131	NA
1582	16907130	1.05012	8.45391	7.37477	7.64261e-05	0.00259015	1.81852	CLK1
1583	16867047	-0.656382	9.15177	-7.37415	7.64723e-05	0.00259015	1.81787	TLE5
1584	16979825	-0.647358	6.24308	-7.37117	7.6692e-05	0.00259596	1.81479	PABPC4L
1585	16668785	1.13975	6.2452	7.36603	7.70725e-05	0.00260719	1.80949	WNT2B
1586	16656401	1.38084	7.59377	7.36494	7.71534e-05	0.00260816	1.80837	NA
1587	16912212	0.59223	7.04338	7.36421	7.72077e-05	0.00260816	1.80761	ZNF337-AS1
1588	16817945	-0.696461	8.3104	-7.36368	7.72471e-05	0.00260816	1.80707	FBRS
1589	16706286	0.599824	7.44396	7.36178	7.73892e-05	0.00261131	1.8051	SAMD8
1590	16931892	-1.58641	4.44477	-7.35969	7.75448e-05	0.00261337	1.80294	ANKRD62P1-PARP4P3
1591	16798570	0.73962	8.77925	7.35966	7.75475e-05	0.00261337	1.8029	HERC2P9
1592	16970863	-0.629562	9.43585	-7.35674	7.77662e-05	0.00261909	1.79989	NAA15
1593	17051965	-0.579797	10.0988	-7.35577	7.78383e-05	0.00261987	1.79889	NUP205
1594	16828518	-0.698885	10.3342	-7.35168	7.81462e-05	0.00262828	1.79466	NA
1595	16756212	0.882347	5.82631	7.35116	7.8186e-05	0.00262828	1.79411	CHST11
1596	16995241	0.778487	5.63177	7.34891	7.83559e-05	0.0026311	1.79179	UGT3A2
1597	16691414	-0.610531	9.59341	-7.34862	7.83775e-05	0.0026311	1.79149	IGSF3
1598	17105719	-0.880306	4.88188	-7.3481	7.84173e-05	0.0026311	1.79095
1599	16877133	0.611839	8.95853	7.34596	7.85791e-05	0.00263488	1.78874	SLC66A3
1600	16780808	-0.883262	6.55362	-7.33167	7.96721e-05	0.00266883	1.77393	POGLUT2
1601	17095217	0.976823	6.8217	7.33142	7.96912e-05	0.00266883	1.77368	FRMD3
1602	16720318	-0.639839	7.8763	-7.3301	7.97927e-05	0.00266978	1.77231	TALDO1
1603	16730471	-1.06788	5.75554	-7.32976	7.98189e-05	0.00266978	1.77196	CEP126
1604	17115996	0.707	11.9515	7.32871	7.99002e-05	0.00267083	1.77087	KRT18P10
1605	17089499	-0.620517	6.28985	-7.32653	8.00686e-05	0.00267479	1.76861
1606	16911212	-0.557145	10.0305	-7.32179	8.04372e-05	0.00268543	1.76369	MCM8,
1607	16860266	-1.16843	6.36756	-7.32108	8.04925e-05	0.0026856	1.76295	ZNF492
1608	16668102	-0.622479	8.84718	-7.32044	8.05424e-05	0.0026856	1.76228	TMEM167B
1609	17112376	0.730771	7.62592	7.3181	8.07249e-05	0.00269001	1.75986	BRWD3
1610	16784883	0.759775	9.55743	7.31708	8.08048e-05	0.002691	1.7588	PCNX4
1611	16811249	0.751651	7.8358	7.31588	8.08987e-05	0.002692	1.75755	UACA
1612	16735738	-0.589803	7.49327	-7.31542	8.09353e-05	0.002692	1.75707	RNF141
1613	16653853	1.26575	6.18094	7.31285	8.1137e-05	0.00269653	1.7544	NA
1614	16985614	-0.655928	7.23099	-7.3124	8.1172e-05	0.00269653	1.75394	CENPH
1615	17125226	0.869623	5.39271	7.30639	8.16463e-05	0.00271061	1.74769	,ANKRD20A7P,ANKRD20A1
1616	17043856	-0.60093	9.23723	-7.30148	8.20361e-05	0.00272044	1.74258	AHR,
1617	16847117	0.648186	9.80274	7.30138	8.20439e-05	0.00272044	1.74248	MTMR4
1618	16777380	2.79912	5.22462	7.29845	8.22779e-05	0.00272651	1.73943	RNY3P4
1619	16736554	-0.674943	7.75621	-7.29463	8.25836e-05	0.00273495	1.73545	SPTY2D1
1620	16667303	0.695199	9.29758	7.29117	8.28615e-05	0.00274246	1.73185	ABCD3
1621	16807139	0.962586	6.38529	7.29015	8.2943e-05	0.00274249	1.7308	NA
1622	16791086	-0.606407	9.64699	-7.28988	8.29649e-05	0.00274249	1.73051	IPO4,
1623	16668415	1.19362	4.36421	7.28715	8.31858e-05	0.0027481	1.72766	LINC01768
1624	16777224	-0.601983	9.1413	-7.28461	8.33913e-05	0.0027532	1.72502	XPO4
1625	17120240	1.21647	5.50765	7.28164	8.3632e-05	0.00275934	1.72193	LINC01409
1626	16751554	0.672353	9.58333	7.28105	8.36802e-05	0.00275934	1.72131	KRT18
1627	16941781	-0.658504	9.66629	-7.27403	8.42537e-05	0.00277508	1.71399	PRKCD
1628	16781980	1.00266	4.84869	7.27394	8.42611e-05	0.00277508	1.71389	TRAV39
1629	16661071	0.695581	7.46378	7.27095	8.45064e-05	0.00278036	1.71078	CNKSR1
1630	16683061	0.613437	8.44551	7.27072	8.45253e-05	0.00278036	1.71054	USP48
1631	16858488	0.753311	7.23685	7.26946	8.4629e-05	0.00278204	1.70922	NA
1632	16743322	0.865108	10.7401	7.26884	8.46801e-05	0.00278204	1.70857	TAF1D,SNORA8,SNORD5,SNORA18
1633	17063536	-0.826415	7.81588	-7.26275	8.51841e-05	0.00279282	1.70221	SLC37A3
1634	16850896	-0.648735	9.967	-7.26275	8.51841e-05	0.00279282	1.70221	TWSG1
1635	16767052	0.614	10.7783	7.2626	8.5196e-05	0.00279282	1.70206	GNS
1636	16728802	0.745963	7.49338	7.26236	8.52165e-05	0.00279282	1.7018	ARHGEF17
1637	16974049	-0.829649	7.60143	-7.26139	8.52964e-05	0.00279373	1.7008	NA
1638	16769569	-0.744307	7.1883	-7.26042	8.5377e-05	0.00279466	1.69979	NUAK1
1639	16918664	-0.76803	8.37305	-7.2581	8.55707e-05	0.00279929	1.69736	EIF6
1640	17121600	1.03338	6.56225	7.25741	8.56277e-05	0.00279945	1.69664	FAM106A
1641	17121260	0.57647	5.21412	7.25579	8.57635e-05	0.00280218	1.69494	WHAMMP3,WHAMMP2
1642	16823097	-0.650892	11.7602	-7.25508	8.58231e-05	0.00280242	1.6942	RNPS1
1643	17119340	0.657493	7.60677	7.2516	8.61144e-05	0.00281022	1.69056	RPSA,SNORA6
1644	17054660	-1.14073	4.53344	-7.24787	8.64285e-05	0.00281716	1.68666
1645	16913733	0.612111	3.83769	7.24783	8.64321e-05	0.00281716	1.68661	NA
1646	17056536	0.759799	6.25729	7.24544	8.66333e-05	0.002822	1.68412	RP9
1647	16926942	0.743458	8.16739	7.24403	8.67528e-05	0.00282418	1.68264	USP18
1648	17120290	0.920291	6.3339	7.24122	8.69913e-05	0.00283023	1.6797
1649	17053654	-0.596161	8.0475	-7.23958	8.71305e-05	0.00283304	1.67798	NUB1
1650	16935767	-0.660076	7.75234	-7.23428	8.75832e-05	0.00284603	1.67243	MCAT
1651	17085561	0.665001	9.15508	7.22909	8.8028e-05	0.00285875	1.66699	CBWD6,CBWD5,CBWD3
1652	16661117	0.687669	7.46792	7.22759	8.81577e-05	0.00286109	1.66542	CEP85
1653	16676461	0.648523	6.58069	7.2263	8.82684e-05	0.00286109	1.66407	CDK18
1654	16812994	0.912792	6.42193	7.22584	8.83085e-05	0.00286109	1.66358	DET1
1655	17121528	-0.689951	9.33721	-7.22578	8.83135e-05	0.00286109	1.66352	EBPL,
1656	16698312	0.590114	8.61129	7.22491	8.83888e-05	0.0028618	1.66261	PLEKHA6
1657	16942991	-0.569172	8.75021	-7.21552	8.92042e-05	0.00288485	1.65276	ARL13B
1658	16819747	-1.00848	7.44472	-7.21548	8.92082e-05	0.00288485	1.65271	NA
1659	16872189	-0.733432	5.72296	-7.21242	8.94761e-05	0.002888	1.6495	LRFN1
1660	16732569	0.862427	7.62646	7.21232	8.94847e-05	0.002888	1.64939	SC5D
1661	16838412	1.14849	5.91411	7.2121	8.95043e-05	0.002888	1.64916
1662	17053333	-0.640606	8.57223	-7.2119	8.95212e-05	0.002888	1.64896	REPIN1
1663	16758321	-0.864592	6.07466	-7.21089	8.96103e-05	0.00288914	1.64789	B3GNT4
1664	16834766	0.624225	12.1675	7.20399	9.02179e-05	0.00290698	1.64064	GRN
1665	16775763	0.823433	10.4958	7.20065	9.05139e-05	0.00291476	1.63713	KRT18P27,MIR622
1666	16871000	0.690138	5.87491	7.19735	9.08069e-05	0.00292245	1.63366	NA
1667	16801850	0.933276	7.17275	7.1946	9.10524e-05	0.00292859	1.63077	RAB8B
1668	17006863	-0.58165	11.8156	-7.19302	9.11939e-05	0.00293138	1.6291	HSPA1A,HSPA1B
1669	17097880	-0.630704	9.37719	-7.19115	9.13611e-05	0.002935	1.62714	FBXW2
1670	16812448	1.11474	7.14792	7.18882	9.15704e-05	0.00293996	1.62468
1671	16653923	1.0343	9.08935	7.18682	9.17503e-05	0.00294221	1.62258	NA
1672	16654035	1.0343	9.08935	7.18682	9.17503e-05	0.00294221	1.62258	NA
1673	17047652	-0.662146	8.95294	-7.18552	9.18674e-05	0.00294353	1.62121	PTPN12
1674	17014798	1.01877	6.20089	7.18515	9.19014e-05	0.00294353	1.62081	SMOC2
1675	16770553	-0.627116	7.3712	-7.17839	9.25136e-05	0.00295954	1.61369	SLC8B1
1676	17086386	1.05336	5.16096	7.17788	9.25601e-05	0.00295954	1.61315	NTRK2
1677	17018256	0.636237	7.82856	7.17729	9.26132e-05	0.00295954	1.61254	CUTA
1678	17082507	-0.767487	7.96513	-7.17663	9.26736e-05	0.00295954	1.61184	BOP1
1679	17077659	0.595759	7.52607	7.17659	9.26771e-05	0.00295954	1.6118	GGH
1680	16687618	0.623608	11.7931	7.17435	9.28813e-05	0.00296374	1.60944	DHCR24
1681	16958812	-0.657199	7.5368	-7.17394	9.29193e-05	0.00296374	1.609	RUVBL1
1682	16851344	-0.657019	9.49313	-7.16589	9.36576e-05	0.00298552	1.60051	SNRPD1
1683	16875970	0.644334	6.58569	7.16472	9.3766e-05	0.0029872	1.59927	ZNF550
1684	16840961	0.730473	4.6877	7.16388	9.3843e-05	0.00298788	1.59839	NA
1685	17090190	-0.821977	8.36547	-7.16185	9.40307e-05	0.00299207	1.59624	NCS1
1686	16654639	1.00861	11.4038	7.16113	9.40981e-05	0.00299244	1.59547	NA
1687	16939668	0.591388	8.30004	7.16049	9.41573e-05	0.00299255	1.5948	NKTR
1688	16964735	-0.854804	5.88891	-7.15765	9.44205e-05	0.00299914	1.59181	S100P
1689	17122676	-1.04236	4.88849	-7.15471	9.46944e-05	0.00300606	1.5887	,CYP4F62P
1690	16884523	0.638425	9.07374	7.15364	9.47947e-05	0.00300746	1.58756	SLC20A1
1691	16968246	-0.559057	8.2806	-7.1521	9.49385e-05	0.00301024	1.58594	BMP2K
1692	16715611	0.802621	6.79968	7.14955	9.51776e-05	0.00301604	1.58324	,BMS1P4
1693	17085432	0.718267	7.98708	7.14859	9.52677e-05	0.00301711	1.58222
1694	16655633	1.2887	8.012	7.14658	9.54566e-05	0.00302131	1.5801	NA
1695	16654565	1.25568	5.00122	7.14161	9.59255e-05	0.00303436	1.57484	NA
1696	16852445	-0.668058	8.08139	-7.14015	9.60642e-05	0.00303695	1.57329	C18orf54
1697	16787902	0.655381	7.01394	7.13754	9.6312e-05	0.00304299	1.57053	,SERPINA3
1698	17061467	-0.542289	8.75084	-7.13692	9.63708e-05	0.00304306	1.56987	PUS7
1699	16729290	0.828042	9.28081	7.13619	9.644e-05	0.00304345	1.5691	TSKU
1700	16925239	-0.680682	7.72306	-7.13256	9.67863e-05	0.00305258	1.56526	DONSON
1701	16740557	0.797448	6.72545	7.13111	9.69252e-05	0.00305389	1.56372	NA
1702	16734686	-0.534522	8.96004	-7.13054	9.69796e-05	0.00305389	1.56312	NUP98
1703	16802479	0.627495	8.15033	7.13005	9.70268e-05	0.00305389	1.5626	GLCE
1704	17124870	-0.821109	8.83931	-7.1295	9.70794e-05	0.00305389	1.56201
1705	16777198	-0.840465	6.97581	-7.12916	9.71125e-05	0.00305389	1.56165	CRYL1
1706	16989962	0.700912	4.96072	7.12661	9.73566e-05	0.00305977	1.55896
1707	16674292	-0.580462	8.96859	-7.12316	9.769e-05	0.00306845	1.55529	RALGPS2
1708	16670728	0.579136	8.33276	7.12244	9.77593e-05	0.00306883	1.55453	BNIPL,C1orf56
1709	16803932	0.686562	7.94829	7.12127	9.78721e-05	0.00307057	1.55329	GOLGA6L10,,GOLGA6L9,GOLGA6L4,GOLGA6L5P,GOLGA6L3
1710	16865945	-0.839685	6.13835	-7.12005	9.79902e-05	0.0030708	1.552	ZNF71
1711	16833708	-0.612497	9.23177	-7.11878	9.81134e-05	0.0030708	1.55065	LASP1
1712	16783764	0.832182	6.29563	7.11842	9.8149e-05	0.0030708	1.55026	C14orf28
1713	16948837	-0.613416	6.18664	-7.11796	9.81931e-05	0.0030708	1.54978	NA
1714	16650407	0.727875	6.66177	7.11764	9.82242e-05	0.0030708	1.54944	NA
1715	16656529	1.13573	6.77444	7.11734	9.82538e-05	0.0030708	1.54911	NA
1716	16929573	-0.658558	9.01956	-7.11707	9.82802e-05	0.0030708	1.54883	MCM5
1717	17004612	-0.555842	11.8903	-7.11565	9.84175e-05	0.0030733	1.54733	DSP
1718	16843906	0.814477	8.23567	7.10958	9.90106e-05	0.00309002	1.54088	,NPEPPSP1,NPEPPS
1719	16805154	0.888205	5.38118	7.10854	9.91134e-05	0.00309143	1.53977	NA
1720	16771805	-0.738807	7.02662	-7.10699	9.92653e-05	0.00309437	1.53813	VPS37B
1721	16794379	0.997652	5.83404	7.1059	9.93727e-05	0.00309505	1.53697
1722	16767751	0.773746	7.63487	7.10559	9.94028e-05	0.00309505	1.53664	PHLDA1,NAP1L1
1723	16955795	-0.820225	4.88922	-7.10402	9.95576e-05	0.00309807	1.53497	LINC00994
1724	17121774	0.602414	5.85007	7.09683	0.00010027	0.00311843	1.52732	LINC00910
1725	16773946	-0.606633	10.5531	-7.09226	0.000100725	0.00313077	1.52246	RFC3
1726	16662475	0.55937	8.35576	7.08902	0.000101049	0.00313903	1.51901	AGO3
1727	16930093	-0.758729	8.34437	-7.08644	0.000101309	0.00314526	1.51626	TOMM22
1728	16796229	0.932812	6.34575	7.0851	0.000101443	0.0031476	1.51485	IFI27L2
1729	17125752	0.824446	6.88695	7.08447	0.000101507	0.00314776	1.51417	UBE2Q2P2,
1730	17052157	-0.659842	7.18065	-7.08171	0.000101785	0.00315457	1.51123	TTC26
1731	16866002	-0.668181	7.03223	-7.08027	0.00010193	0.00315725	1.5097	ZNF543
1732	17095918	-0.597827	8.50544	-7.07901	0.000102059	0.00315941	1.50835	IPPK
1733	17082088	-0.666038	8.24228	-7.07744	0.000102218	0.00316113	1.50668	ZC3H3
1734	17071584	-0.632615	10.1569	-7.0773	0.000102232	0.00316113	1.50653	ATP6V1C1
1735	16811312	0.700943	9.17196	7.07611	0.000102353	0.00316302	1.50527	MYO9A
1736	17062460	-0.551183	10.5182	-7.07551	0.000102414	0.0031631	1.50462	WASL
1737	16692297	0.583793	9.10103	7.07476	0.00010249	0.00316362	1.50383	PRKAB2
1738	16886677	0.676933	9.74308	7.07207	0.000102765	0.00316965	1.50095	GPD2
1739	16749511	-0.583925	9.07907	-7.07169	0.000102803	0.00316965	1.50055	MRPS35
1740	17126192	0.814289	8.78496	7.07025	0.000102951	0.00317176	1.49901	SNHG29,SNORD49B
1741	16776353	0.593835	5.34292	7.06986	0.00010299	0.00317176	1.4986	MYO16
1742	16656145	1.19366	3.26491	7.06793	0.000103189	0.00317604	1.49654	NA
1743	16794966	0.638008	11.0939	7.06638	0.000103347	0.00317909	1.49489	ERG28
1744	16916144	0.770374	7.35402	7.06474	0.000103517	0.00318248	1.49313	NA
1745	16836863	1.08952	5.33929	7.06217	0.000103781	0.00318878	1.49039	NA
1746	16929855	-0.869901	7.48792	-7.06057	0.000103947	0.00319025	1.48868	LGALS1
1747	16893414	-0.910746	6.49762	-7.06056	0.000103948	0.00319025	1.48867	ANO7
1748	16815001	-0.657285	10.0138	-7.05789	0.000104224	0.00319691	1.48582	TRAF7
1749	17013784	-0.58845	11.6393	-7.05609	0.000104412	0.00319921	1.48389	ARMT1
1750	16883107	1.58844	6.33941	7.05602	0.000104419	0.00319921	1.48382	ANKRD36
1751	16832568	0.76494	8.64054	7.05199	0.000104839	0.00321025	1.47951	RPL23A,SNORD4A,SNORD42A,SNORD4B
1752	17122922	-0.57209	8.81517	-7.05092	0.000104951	0.00321089	1.47837	,PIK3CA
1753	17058000	1.22973	5.78872	7.05064	0.000104979	0.00321089	1.47807	RNU6-1052P
1754	16930947	-0.797379	5.95858	-7.04934	0.000105115	0.00321321	1.47669	BIK
1755	17092739	0.6299	10.8843	7.04814	0.000105241	0.00321341	1.4754	NA
1756	16839425	0.673535	8.71307	7.04814	0.000105242	0.00321341	1.4754	SLC43A2
1757	16785952	0.643274	9.67331	7.04715	0.000105345	0.00321474	1.47434	PCNX1
1758	17045806	0.617904	10.1123	7.04567	0.000105501	0.00321765	1.47276	ADCY1
1759	16651433	0.980578	7.21444	7.04468	0.000105605	0.003219	1.4717	NA
1760	16889954	0.933184	9.20671	7.04023	0.000106075	0.00323148	1.46694	EEF1B2,,SNORD51
1761	16732045	0.8195	7.92763	7.03918	0.000106186	0.00323304	1.46581	UPK2
1762	17118692	1.17101	6.93388	7.03818	0.000106291	0.00323441	1.46475	SNHG12,SNORA44,SNORA16A
1763	17057149	0.707036	7.05631	7.03618	0.000106504	0.00323905	1.4626	POLM
1764	17084767	0.708177	5.97688	7.03456	0.000106677	0.00324245	1.46086	NPR2
1765	16959441	0.691112	7.81146	7.03367	0.000106771	0.00324349	1.45991	AMOTL2
1766	16823413	-0.61735	10.7628	-7.03298	0.000106845	0.00324389	1.45917	TRAP1
1767	16670739	0.690381	6.70429	7.03121	0.000107033	0.00324777	1.45728	MLLT11
1768	16815289	-0.689334	9.20694	-7.02914	0.000107255	0.00325264	1.45506	PAQR4
1769	16810968	0.557717	10.9643	7.0269	0.000107496	0.00325811	1.45265	NA
1770	16808460	0.674583	8.25788	7.02379	0.00010783	0.00326639	1.44933	SPG11
1771	16859900	-0.59704	9.32668	-7.02271	0.000107946	0.0032678	1.44817	DDX49
1772	16850437	-0.652183	10.7245	-7.02223	0.000107998	0.0032678	1.44765	USP14
1773	16976074	-0.5255	10.351	-7.02054	0.000108181	0.00327149	1.44583	CLOCK
1774	16811192	0.591587	8.06439	7.01954	0.000108289	0.00327219	1.44477	TLE3
1775	16932782	0.600478	8.54675	7.01873	0.000108376	0.00327219	1.4439	PI4KAP1,PI4KA,PI4KAP2
1776	16920315	0.754303	8.67582	7.01777	0.00010848	0.00327219	1.44287	NFATC2
1777	16764092	0.8437	6.98197	7.0176	0.000108499	0.00327219	1.44269	NA
1778	16845850	1.02627	7.18324	7.0175	0.00010851	0.00327219	1.44258
1779	16881735	0.635066	6.76003	7.00826	0.000109518	0.00330074	1.43266	TTC31
1780	16835374	0.603167	10.5821	7.00752	0.000109599	0.00330133	1.43186	NFE2L1
1781	16934302	0.747455	4.73716	7.00685	0.000109672	0.00330167	1.43115	NA
1782	16668150	-0.54683	8.98389	-7.00537	0.000109835	0.00330278	1.42955	SARS1
1783	16991151	0.802562	5.77367	7.00506	0.000109868	0.00330278	1.42923	SYNPO
1784	16843511	0.564164	6.20797	7.00483	0.000109894	0.00330278	1.42898	CCL5
1785	17025895	0.748214	6.76039	7.00146	0.000110265	0.0033121	1.42536	WDR27
1786	17083614	0.659935	8.14127	6.99936	0.000110497	0.0033165	1.4231	LURAP1L
1787	16706422	1.25986	9.66274	6.99902	0.000110536	0.0033165	1.42273	NA
1788	16986203	0.614825	11.0891	6.99738	0.000110717	0.00331985	1.42097	HEXB
1789	17119088	0.739665	9.11762	6.9969	0.000110771	0.00331985	1.42045	SNHG20,SCARNA16,MIR6516
1790	16908926	1.82853	7.06358	6.9937	0.000111126	0.00332862	1.41701	NA
1791	16705448	1.24312	4.56166	6.99089	0.000111439	0.00333177	1.41399	RNU6-697P
1792	16865675	0.574278	7.63195	6.99073	0.000111458	0.00333177	1.41381	RPL28
1793	16802795	0.619941	10.3356	6.9907	0.000111461	0.00333177	1.41378	NEO1
1794	17124446	0.900288	4.24457	6.99054	0.000111479	0.00333177	1.4136	DPY19L2P3
1795	17123040	0.734204	9.45493	6.98762	0.000111806	0.00333966	1.41046	PI4KAP1,PI4KA,PI4KAP2
1796	16904917	0.755841	7.15826	6.98593	0.000111996	0.00334348	1.40864	FASTKD1
1797	16997574	-0.806876	7.89576	-6.98128	0.000112519	0.00335418	1.40364	HOMER1
1798	16815914	-0.655757	7.82137	-6.98127	0.000112521	0.00335418	1.40362	SNN
1799	16893574	0.798658	7.61827	6.98035	0.000112624	0.00335418	1.40264	ING5
1800	17062580	-0.553184	9.20508	-6.98006	0.000112657	0.00335418	1.40232	ZNF800
1801	16985518	0.556122	10.1371	6.97997	0.000112667	0.00335418	1.40223	PIK3R1
1802	16967843	-0.694732	4.79204	-6.97926	0.000112748	0.00335471	1.40146	EREG
1803	17011593	0.64763	8.19786	6.97791	0.0001129	0.00335739	1.40001	FIG4
1804	16776827	-0.587891	8.85983	-6.97656	0.000113054	0.0033601	1.39855	CUL4A
1805	16898957	0.821228	6.42854	6.97372	0.000113377	0.00336783	1.39549	NA
1806	17045001	0.734552	7.69355	6.97294	0.000113466	0.0033686	1.39465	LINC00997
1807	16915961	1.38561	4.50506	6.97165	0.000113613	0.0033711	1.39326	COL20A1,RNU6-994P
1808	16743577	-0.637492	9.05878	-6.96708	0.000114135	0.00338345	1.38833	PGR
1809	16778715	0.632401	9.58562	6.96602	0.000114258	0.00338345	1.38718	TPT1
1810	17087209	-0.782134	3.17547	-6.96597	0.000114263	0.00338345	1.38713	NA
1811	16987673	0.824223	8.09235	6.96581	0.000114281	0.00338345	1.38696	PAM
1812	16978417	0.628023	7.34205	6.9638	0.000114512	0.00338471	1.38479	SLC39A8
1813	16861427	-0.552847	4.44753	-6.96356	0.00011454	0.00338471	1.38453	ZNF382
1814	16747336	0.975088	8.60844	6.96352	0.000114545	0.00338471	1.38448	SCARNA10,
1815	16687467	0.950711	6.95985	6.96324	0.000114577	0.00338471	1.38419	HSPB11
1816	16701092	-0.66527	7.39937	-6.96122	0.00011481	0.00338855	1.382	OPN3
1817	16803966	0.64756	7.64513	6.96102	0.000114833	0.00338855	1.38179	UBE2Q2P2
1818	16993235	0.756291	7.79144	6.95926	0.000115037	0.00339269	1.37989	N4BP3
1819	16832350	0.695537	7.41363	6.95861	0.000115112	0.00339304	1.37919	KSR1
1820	17112596	-1.19964	5.70196	-6.95745	0.000115246	0.00339416	1.37794	PCDH19
1821	16759411	-0.610326	9.56876	-6.95719	0.000115276	0.00339416	1.37765	EP400
1822	16977579	0.810536	6.57542	6.95632	0.000115378	0.00339528	1.37671	ABRAXAS1
1823	16755526	1.22264	8.08929	6.95314	0.000115747	0.00340114	1.37328	NA
1824	16850322	0.590189	7.07578	6.95269	0.0001158	0.00340114	1.37279	ARL17B,ARL17A,
1825	17124988	-0.691742	11.0341	-6.95248	0.000115824	0.00340114	1.37257	TPM4,
1826	16791401	0.746728	7.76999	6.95243	0.000115831	0.00340114	1.37251	SDR39U1
1827	16984056	0.953898	5.21212	6.95073	0.000116029	0.00340365	1.37067	SLC1A3
1828	17016503	-0.8802	12.8022	-6.95061	0.000116043	0.00340365	1.37054	H3C11
1829	16818630	0.587321	9.23013	6.9484	0.000116302	0.00340937	1.36815	PHKB
1830	16823197	-0.917698	9.69062	-6.945	0.0001167	0.00341918	1.36448	NA
1831	16764620	0.566513	8.6932	6.94397	0.000116821	0.00342086	1.36336	SLC11A2
1832	16919022	-0.595196	8.29184	-6.94276	0.000116964	0.00342228	1.36205	SAMHD1
1833	16773379	0.776818	5.50465	6.9423	0.000117018	0.00342228	1.36156	ATP8A2
1834	16823102	-0.756417	11.9792	-6.94175	0.000117083	0.00342228	1.36096	NA
1835	17121280	0.936852	6.28277	6.94139	0.000117125	0.00342228	1.36058	NA
1836	16812406	0.935224	7.48223	6.93942	0.000117359	0.00342725	1.35843	STARD5
1837	17079771	-0.698096	6.01385	-6.93566	0.000117804	0.0034368	1.35437
1838	16847863	0.762012	6.46116	6.93558	0.000117814	0.0034368	1.35428	ARHGAP27P1-BPTFP1-KPNA2P3,PLEKHM1P1
1839	16880001	0.551328	5.79363	6.93324	0.000118092	0.00344251	1.35175	NA
1840	16754783	0.829878	6.23483	6.93285	0.000118138	0.00344251	1.35133	METTL25
1841	17005108	-0.761253	7.27494	-6.93119	0.000118337	0.00344641	1.34953	ATXN1-AS1
1842	16823193	-0.791059	9.21409	-6.9302	0.000118455	0.0034468	1.34846	ELOB
1843	16994960	-0.581167	10.3725	-6.92991	0.00011849	0.0034468	1.34814	GOLPH3
1844	16692311	0.717463	5.67199	6.92947	0.000118543	0.0034468	1.34766	FMO5
1845	16731605	-0.589715	7.84546	-6.92839	0.000118671	0.00344867	1.3465	SIDT2
1846	16862974	0.697634	5.08604	6.92754	0.000118773	0.00344975	1.34558	ZNF233
1847	16899619	0.600197	9.35058	6.92063	0.000119605	0.00347204	1.33809	TGOLN2
1848	16866867	-0.73689	9.89434	-6.91937	0.000119757	0.00347251	1.33672	MOB3A
1849	17052937	-0.716112	6.69506	-6.91917	0.000119781	0.00347251	1.3365	OR2A1,
1850	16657514	0.722429	6.54558	6.91889	0.000119815	0.00347251	1.3362	LINC01128
1851	16700515	0.744313	7.80668	6.91824	0.000119895	0.00347293	1.33549	SIPA1L2
1852	16657476	0.622257	8.50931	6.91724	0.000120015	0.00347455	1.33441	,RPL23AP87
1853	16667960	-1.14814	7.39375	-6.9154	0.000120239	0.00347915	1.33241	SLC25A24P1
1854	16804003	0.855539	7.9372	6.91326	0.000120499	0.00348235	1.33009	GOLGA6L10,GOLGA6L9,GOLGA6L17P,GOLGA6L4,GOLGA6L5P,GOLGA6L3,
1855	17085558	1.56848	5.78683	6.91257	0.000120584	0.00348235	1.32933
1856	16881514	0.569482	8.51394	6.91249	0.000120593	0.00348235	1.32926	ALMS1
1857	16948278	-0.604336	9.07083	-6.91235	0.00012061	0.00348235	1.3291	ACTL6A
1858	16802162	0.622476	8.66635	6.91147	0.000120717	0.00348359	1.32815	DIS3L
1859	16650121	1.51725	3.38005	6.9075	0.000121203	0.00349571	1.32384	NA
1860	16778392	-0.839507	7.81647	-6.90428	0.000121599	0.00350488	1.32033	FOXO1
1861	16653825	0.97993	6.79061	6.90385	0.000121652	0.00350488	1.31987	NA
1862	17057066	0.745668	7.75194	6.90205	0.000121873	0.00350938	1.31792	COA1
1863	16816214	-0.630216	9.70266	-6.89747	0.00012244	0.00352382	1.31293	ABCC1
1864	16848692	-0.569608	9.58666	-6.89627	0.000122588	0.00352619	1.31164	HID1
1865	16664299	0.719992	7.32148	6.89353	0.000122929	0.0035341	1.30865	FAAH
1866	17021901	-0.770676	5.92726	-6.89222	0.000123093	0.00353692	1.30722	FAXC
1867	16812544	0.694384	8.0137	6.89079	0.000123272	0.00353989	1.30567	GOLGA6L10,GOLGA6L9,GOLGA6L4,GOLGA6L5P,GOLGA6L3,
1868	16948087	1.18786	5.6908	6.89033	0.000123329	0.00353989	1.30517	NA
1869	16985491	1.06672	3.79987	6.88805	0.000123614	0.00354472	1.30269	MAST4-IT1
1870	16840066	0.603909	6.92814	6.88793	0.000123629	0.00354472	1.30256	ALOX15
1871	17121568	0.88679	7.58774	6.88736	0.0001237	0.00354487	1.30194	ALOX12P2
1872	16767901	0.903809	5.49952	6.88351	0.000124185	0.00355685	1.29774
1873	16651333	1.5821	7.0441	6.8806	0.000124552	0.00356545	1.29458	NA
1874	16654771	1.01473	7.92438	6.87815	0.000124862	0.00357079	1.29191	NA
1875	16835174	0.979132	4.67314	6.87763	0.000124927	0.00357079	1.29134	EFCAB13
1876	16685866	0.851851	6.85334	6.87755	0.000124938	0.00357079	1.29125	NFYC-AS1
1877	16870956	0.768229	6.53357	6.87582	0.000125157	0.00357398	1.28937	ZNF91
1878	17077341	-1.40044	4.577	-6.87562	0.000125183	0.00357398	1.28915	SDR16C5
1879	17117680	-0.812158	8.66028	-6.87413	0.000125372	0.00357748	1.28753	NA
1880	16650169	1.02423	6.41513	6.87322	0.000125488	0.00357888	1.28654	NA
1881	17062502	-0.583489	7.76043	-6.87226	0.000125611	0.00358048	1.28549	POT1
1882	16705024	1.29276	4.54357	6.86761	0.000126205	0.0035955	1.28042	RNA5SP318
1883	16656539	0.929802	8.3177	6.86613	0.000126396	0.00359903	1.2788	NA
1884	16761820	0.786088	8.52367	6.86462	0.000126589	0.00360262	1.27716	MGP
1885	16795021	0.613188	8.67154	6.86176	0.000126957	0.00361118	1.27404	ANGEL1
1886	16847820	0.559708	12.6053	6.86097	0.000127061	0.0036121	1.27317	DDX5
1887	16651233	1.37518	7.55939	6.86047	0.000127124	0.0036121	1.27263	NA
1888	17097132	-1.1414	5.35224	-6.85953	0.000127246	0.00361281	1.2716	LPAR1
1889	17117695	0.767668	7.34269	6.85924	0.000127284	0.00361281	1.27128	CDYL2
1890	16841802	0.590251	7.54604	6.8578	0.000127471	0.00361573	1.2697	ZNF624
1891	16990304	-0.869297	7.96746	-6.85701	0.000127573	0.00361573	1.26885	PCDHB12
1892	16926751	0.833381	7.19569	6.85688	0.000127589	0.00361573	1.26871	NA
1893	17126034	0.797824	6.49314	6.85097	0.000128359	0.0036324	1.26225	NA
1894	17126144	0.797824	6.49314	6.85097	0.000128359	0.0036324	1.26225	NA
1895	16978568	-0.578458	8.9726	-6.85081	0.000128381	0.0036324	1.26207	CENPE
1896	16918351	-0.604271	8.65496	-6.84705	0.000128873	0.00364285	1.25796	,COMMD7
1897	16728560	0.632839	6.90821	6.84695	0.000128886	0.00364285	1.25785	IL18BP
1898	17120874	0.573461	7.74998	6.84495	0.000129149	0.00364835	1.25566	PARP4P2,PARP4
1899	16846849	0.62613	7.98921	6.84347	0.000129343	0.00365191	1.25405	COX11
1900	17118492	-0.552517	13.3952	-6.83994	0.000129809	0.00365943	1.25019	NA
1901	16838103	0.861908	6.21053	6.83965	0.000129847	0.00365943	1.24987	SNHG16,SNORD1B,SNORD1A
1902	16835934	0.685335	7.97285	6.83952	0.000129865	0.00365943	1.24972	SPATA20
1903	16671642	0.658221	7.86014	6.83939	0.000129882	0.00365943	1.24958	EFNA1
1904	16725393	-0.579792	10.6325	-6.83856	0.000129992	0.00366061	1.24867	TMEM109
1905	16682829	-0.629207	8.18157	-6.83668	0.000130242	0.00366571	1.24661	CAMK2N1
1906	17042650	0.623019	7.94387	6.83417	0.000130575	0.00367308	1.24387	CUTA
1907	16859253	-0.548478	10.2816	-6.83368	0.000130641	0.00367308	1.24333	TPM4
1908	16988801	-0.695333	10.9201	-6.83291	0.000130743	0.00367404	1.24249	SLC12A2
1909	16678135	0.981217	6.50585	6.83228	0.000130827	0.00367447	1.2418	NA
1910	16734646	1.22402	4.78859	6.83009	0.000131119	0.00368074	1.23941	NA
1911	16968583	-0.643387	8.14849	-6.82722	0.000131505	0.00368781	1.23625	AFF1
1912	16916546	-0.576255	9.02012	-6.82712	0.000131517	0.00368781	1.23615	SNRPB
1913	16918918	-0.546617	11.6138	-6.82667	0.000131577	0.00368781	1.23566	NORAD
1914	16984032	-0.58835	9.43329	-6.82614	0.000131649	0.00368788	1.23508	SKP2
1915	16860626	-0.794347	7.08391	-6.82139	0.000132289	0.00370365	1.22987	LRP3
1916	16987798	0.554909	7.69231	6.82094	0.00013235	0.00370365	1.22938	FER
1917	16763540	0.549925	12.9437	6.81917	0.00013259	0.00370714	1.22743	SLC38A2
1918	16651335	0.692728	7.03001	6.819	0.000132613	0.00370714	1.22724	NA
1919	17077774	0.549316	8.27415	6.81489	0.00013317	0.00372077	1.22274	PDE7A
1920	16774669	-0.584327	7.21342	-6.81416	0.000133269	0.00372162	1.22194	NUDT15
1921	16946666	0.558335	6.33113	6.81309	0.000133416	0.00372201	1.22076	NA
1922	16651599	0.661493	8.24493	6.81304	0.000133422	0.00372201	1.22071	NA
1923	16915755	0.52764	9.01429	6.81225	0.00013353	0.00372308	1.21984	OGFR
1924	16793800	1.28262	4.69826	6.81047	0.000133774	0.0037266	1.21788
1925	16823103	-0.865757	9.47437	-6.81031	0.000133795	0.0037266	1.21771	NA
1926	16811730	0.788462	6.75154	6.80779	0.00013414	0.00373394	1.21494	FAM219B
1927	16696533	0.785233	8.97284	6.80737	0.000134198	0.00373394	1.21448	GAS5
1928	16677514	-0.978903	4.87982	-6.80451	0.00013459	0.00374291	1.21135	SPATA17
1929	16811936	0.74483	7.95973	6.803	0.000134799	0.00374462	1.20969	SCAPER
1930	16795755	0.6838	7.12826	6.80266	0.000134846	0.00374462	1.20931	TTC7B
1931	16838581	0.576593	9.14069	6.80255	0.000134861	0.00374462	1.20919	RNF213
1932	16783927	1.32226	5.34451	6.80068	0.00013512	0.00374724	1.20713	KLHDC1
1933	16653835	1.57562	7.07991	6.8004	0.000135159	0.00374724	1.20682	NA
1934	17105269	0.707141	4.19027	6.80022	0.000135183	0.00374724	1.20663	FAM133A
1935	16821280	-0.545396	9.27619	-6.79984	0.000135235	0.00374724	1.20621	GAN
1936	17093138	0.674444	3.69246	6.79888	0.000135368	0.00374795	1.20516	NA
1937	17062491	-0.769818	7.18607	-6.79865	0.000135401	0.00374795	1.2049	GPR37
1938	16902879	0.627457	5.45428	6.7954	0.000135851	0.00375786	1.20133	NA
1939	16654595	0.70058	8.83773	6.79506	0.000135899	0.00375786	1.20096	NA
1940	16865967	-0.742154	5.23794	-6.79407	0.000136037	0.00375974	1.19987	ZNF264
1941	17047411	-0.570278	7.30953	-6.79356	0.000136108	0.00375977	1.19931	NA
1942	16944695	0.770335	7.29824	6.792	0.000136326	0.00376385	1.19759	PARP14
1943	16814488	-0.597458	10.5369	-6.78983	0.000136629	0.00376928	1.1952	STUB1
1944	17105018	0.653487	7.40296	6.78934	0.000136698	0.00376928	1.19466	ATP7A
1945	16968621	-0.6045	8.59781	-6.7885	0.000136815	0.00376928	1.19374	NUDT9
1946	16777856	0.73266	7.62202	6.78823	0.000136853	0.00376928	1.19345	NA
1947	17122638	0.741941	7.92956	6.78808	0.000136874	0.00376928	1.19328	LINC00342,
1948	17024633	-0.513752	8.92619	-6.78733	0.00013698	0.00377026	1.19245	NUP43
1949	17003558	1.05928	8.18267	6.78589	0.000137182	0.00377388	1.19087	CLK4
1950	16792420	-0.671916	5.17186	-6.78395	0.000137455	0.00377945	1.18873	MDGA2
1951	16971463	0.732224	5.86692	6.78082	0.000137897	0.00378965	1.18529	RN7SKP35
1952	16900734	0.623943	7.76448	6.77911	0.000138139	0.00379437	1.1834	NA
1953	17104664	0.584283	7.92884	6.77767	0.000138343	0.00379535	1.18181	NA
1954	17044969	0.538572	10.2635	6.77763	0.000138349	0.00379535	1.18177	AVL9
1955	17115777	1.049	6.9234	6.77736	0.000138387	0.00379535	1.18147	RAB39B
1956	16818693	0.834208	6.27439	6.77656	0.000138501	0.00379624	1.18059	LONP2
1957	17020464	-0.714433	7.93654	-6.77613	0.000138561	0.00379624	1.18012	RAB23
1958	17087958	-0.625479	5.70931	-6.77468	0.000138768	0.00379814	1.17852	NA
1959	17015587	-0.781598	5.11268	-6.77465	0.000138772	0.00379814	1.17849	C6orf52
1960	16823666	0.597077	8.54898	6.77346	0.000138942	0.00380085	1.17718	PPL
1961	16922907	0.643442	12.3634	6.76948	0.000139511	0.00381378	1.17279	DSCAM-AS1
1962	16939439	-1.01566	6.05857	-6.76916	0.000139557	0.00381378	1.17243	MYRIP
1963	17121594	1.02346	6.58631	6.76757	0.000139785	0.00381805	1.17068	CCDC144A,,CCDC144B,CCDC144CP
1964	16830837	0.90103	8.22808	6.76598	0.000140014	0.00382066	1.16892	CHD3,SCARNA21
1965	16702524	0.769989	6.7264	6.76468	0.0001402	0.00382066	1.1675	CAMK1D
1966	16955800	-0.870853	7.01275	-6.76411	0.000140283	0.00382066	1.16686	PRICKLE2
1967	17026318	-0.535058	12.3048	-6.76364	0.00014035	0.00382066	1.16635	HSPA1A,HSPA1B
1968	17027994	-0.535058	12.3048	-6.76364	0.00014035	0.00382066	1.16635	HSPA1A,HSPA1B
1969	17030820	-0.535058	12.3048	-6.76364	0.00014035	0.00382066	1.16635	HSPA1A,HSPA1B
1970	17104122	-0.703527	6.2779	-6.76344	0.000140379	0.00382066	1.16613	MAGEH1
1971	17063168	-0.540677	9.93123	-6.76063	0.000140785	0.00382976	1.16303	CNOT4
1972	17126084	-0.597833	8.34845	-6.75864	0.000141073	0.00383292	1.16083	NA
1973	17126126	-0.597833	8.34845	-6.75864	0.000141073	0.00383292	1.16083	NA
1974	16994054	-0.816862	7.18078	-6.75786	0.000141187	0.00383292	1.15996	IRX4
1975	16816978	0.616807	6.28543	6.75748	0.000141241	0.00383292	1.15955	SCNN1B
1976	16654675	1.40088	7.66303	6.75664	0.000141364	0.00383292	1.15862	NA
1977	16950519	0.59759	8.08714	6.75645	0.000141392	0.00383292	1.1584	NA
1978	16668919	-0.769827	8.51842	-6.7563	0.000141413	0.00383292	1.15824	MAGI3
1979	16995333	-0.556326	6.91334	-6.75589	0.000141473	0.00383292	1.15779	NIPBL-DT
1980	17067170	-0.65038	9.81979	-6.75441	0.000141688	0.00383681	1.15616	BNIP3L
1981	16915457	-0.662751	6.58811	-6.75336	0.000141842	0.00383851	1.15499	CDH26
1982	16761663	0.780232	9.34109	6.753	0.000141894	0.00383851	1.1546	HEBP1
1983	16717625	0.630275	7.03325	6.75238	0.000141985	0.00383904	1.15391	MRPL43
1984	16770507	-0.558318	9.52049	-6.75109	0.000142173	0.00384218	1.15249	DDX54
1985	16920806	-0.714857	9.12764	-6.75058	0.000142248	0.00384228	1.15192	SYCP2
1986	16785606	0.572845	8.67217	6.74972	0.000142374	0.00384348	1.15097	MPP5
1987	16847829	0.633925	12.1014	6.74929	0.000142436	0.00384348	1.1505	NA
1988	17090109	0.623288	8.87348	6.7487	0.000142523	0.00384389	1.14985	TOR1B
1989	17084605	0.613082	7.94991	6.74808	0.000142615	0.00384443	1.14916	UNC13B
1990	16998368	0.605216	7.93098	6.74726	0.000142735	0.00384574	1.14825	ERAP1
1991	16784412	0.607177	9.22402	6.74607	0.000142909	0.00384851	1.14694	KTN1
1992	16752715	0.604318	6.50465	6.74554	0.000142987	0.00384855	1.14636	LRP1
1993	17094432	0.783613	6.6856	6.74497	0.000143072	0.00384855	1.14572	RNA5SP530,,RNA5SP283,RNA5SP284
1994	16956244	-0.615255	8.64097	-6.74372	0.000143256	0.00384855	1.14434	RYBP,
1995	16656623	0.813198	7.76366	6.74366	0.000143265	0.00384855	1.14427	NA
1996	17044758	-0.850287	6.06981	-6.74317	0.000143337	0.00384855	1.14373	MTURN
1997	16653007	0.944103	8.1067	6.74302	0.000143359	0.00384855	1.14356	NA
1998	16922779	0.599239	8.89552	6.74265	0.000143413	0.00384855	1.14316	ETS2
1999	16924966	-0.542418	8.4147	-6.73916	0.00014393	0.00386049	1.1393	MIS18A
[truncated: 51,618 more rows]
